# Supplementary material for: A Cdk4/6-dependent phosphorylation gradient regulates the early to late G1 phase transition
Source: Sci Rep. 2021 Jul 19;11:14736. doi: 10.1038/s41598-021-94200-w (PMC8290049; doi:10.1038/s41598-021-94200-w)
Supplement: Supplementary file 6 — Supplementary Information 2. [file 41598_2021_94200_MOESM6_ESM.xlsx]

## Sheet: Non-Phos
Protein	Description	(+)(+)1	(+)(+)2	(+)(+)3	(+)(-)1	(+)(-)2	(+)(-)3	(+)(+)Avg	(+)(-)Avg	(+)(+) vs (+)(-) p-value	Log2 [(+)(+)/(+)(-)]	(-)Log p-value
Q8TEV9	Smith-Magenis syndrome chromosomal region candidate gene 8 protein OS=Homo sapiens GN=SMCR8 PE=1 SV=2	557.111	546.02	548.496	670.363	653.8	660.593	550.542	661.585	0.000102114	-0.265073	3.99092
Q86SK9	Stearoyl-CoA desaturase 5 OS=Homo sapiens GN=SCD5 PE=1 SV=2	464.317	479.749	485.735	721.925	737.702	769.193	476.6	742.94	0.00060307	-0.640467	3.21963
A6NKF1	SAC3 domain-containing protein 1 OS=Homo sapiens GN=SAC3D1 PE=1 SV=2	525.663	545.891	532.094	681.774	658.89	694.634	534.55	678.433	0.000951193	-0.343882	3.02173
Q5TFE4	5'-nucleotidase domain-containing protein 1 OS=Homo sapiens GN=NT5DC1 PE=1 SV=1	654.095	681.803	663.42	519.25	548.639	509.354	666.439	525.748	0.00106559	0.342102	2.97241
P25098	Beta-adrenergic receptor kinase 1 OS=Homo sapiens GN=ADRBK1 PE=1 SV=2	658.444	639.721	673.677	520.397	536.254	558.463	657.281	538.372	0.0013696	0.287907	2.86341
P62987	Ubiquitin-60S ribosomal protein L40 OS=Homo sapiens GN=UBA52 PE=1 SV=2	669.173	637.582	674.786	551.392	545.743	513.956	660.514	537.031	0.00167673	0.298584	2.77554
Q9BZI7	Regulator of nonsense transcripts 3B OS=Homo sapiens GN=UPF3B PE=1 SV=1	685.096	665.359	639.563	552.135	516.609	532.813	663.339	533.853	0.00188894	0.313306	2.72378
Q99715	Collagen alpha-1(XII) chain OS=Homo sapiens GN=COL12A1 PE=1 SV=2	649.879	722.963	701.657	477.064	487.24	521.801	691.5	495.368	0.0030854	0.481227	2.51069
A4D1U4	Protein LCHN OS=Homo sapiens GN=LCHN PE=2 SV=1	627.537	637.43	661.385	555.38	541.49	570.913	642.117	555.928	0.00308838	0.207939	2.51027
P11217	Glycogen phosphorylase, muscle form OS=Homo sapiens GN=PYGM PE=1 SV=6	535.39	543.036	505.552	717.124	654.616	693.171	527.992	688.304	0.00332782	-0.382529	2.47784
Q9P1Z0	Zinc finger and BTB domain-containing protein 4 OS=Homo sapiens GN=ZBTB4 PE=1 SV=3	521.86	552.879	559.1	691.879	670.311	640.046	544.613	667.412	0.00364759	-0.293347	2.43799
Q9UER7	Death domain-associated protein 6 OS=Homo sapiens GN=DAXX PE=1 SV=2	631.849	636.609	625.701	563.513	558.822	580.921	631.386	567.752	0.0040989	0.153263	2.38733
Q08043	Alpha-actinin-3 OS=Homo sapiens GN=ACTN3 PE=1 SV=2	625.008	656.139	632.192	540.247	574.258	558.73	637.779	557.745	0.00420287	0.193451	2.37645
Q9Y2Q5	Ragulator complex protein LAMTOR2 OS=Homo sapiens GN=LAMTOR2 PE=1 SV=1	497.327	556.803	543.214	717.409	676.071	649.532	532.448	681.004	0.00525306	-0.355022	2.27959
Q8TDJ6	DmX-like protein 2 OS=Homo sapiens GN=DMXL2 PE=1 SV=2	516.686	570.589	552.032	693.559	650.612	650.755	546.436	664.975	0.00527089	-0.283248	2.27812
D6RG30	Asteroid homolog 1 (Drosophila), isoform CRA_c OS=Homo sapiens GN=ASTE1 PE=1 SV=1	549.03	583.108	561.895	633.055	652.672	639.72	564.678	641.816	0.00543602	-0.184732	2.26472
Q86UT6	NLR family member X1 OS=Homo sapiens GN=NLRX1 PE=1 SV=1	527.148	565.418	512.275	645.324	665.901	712.465	534.947	674.563	0.00614095	-0.334558	2.21176
Q12955	Ankyrin-3 OS=Homo sapiens GN=ANK3 PE=1 SV=3	435.128	545.534	502.822	664.739	737.604	744.641	494.495	715.661	0.00660879	-0.53332	2.17988
Q8NHV4	Protein NEDD1 OS=Homo sapiens GN=NEDD1 PE=1 SV=1	565.874	559.016	565.148	664.629	636.789	640.929	563.346	647.449	0.00750177	-0.200744	2.12484
Q9H0B6	Kinesin light chain 2 OS=Homo sapiens GN=KLC2 PE=1 SV=1	673.372	632.071	632.113	571.517	539.027	553.628	645.852	554.724	0.00773955	0.219433	2.11128
Q9UGR2	Zinc finger CCCH domain-containing protein 7B OS=Homo sapiens GN=ZC3H7B PE=1 SV=1	631.574	633.222	667.029	527.4	552.931	576.427	643.942	552.253	0.00819883	0.221601	2.08625
Q9BX67	Junctional adhesion molecule C OS=Homo sapiens GN=JAM3 PE=1 SV=1	473.814	564.451	513.706	720.372	723.862	641.102	517.324	695.112	0.00918431	-0.426177	2.03695
D3DTX6	Neurabin-2 OS=Homo sapiens GN=PPP1R9B PE=1 SV=1	585.538	551.06	537.333	650.38	677.453	629.167	557.977	652.333	0.00923579	-0.225403	2.03453
O75695	Protein XRP2 OS=Homo sapiens GN=RP2 PE=1 SV=4	547.145	575.797	512.989	657.629	697.33	635.297	545.31	663.419	0.0100149	-0.282842	1.99936
Q9BYM8	RanBP-type and C3HC4-type zinc finger-containing protein 1 OS=Homo sapiens GN=RBCK1 PE=1 SV=2	590.024	552.214	547.703	653.336	657.063	631.728	563.313	647.376	0.0102066	-0.200666	1.99112
Q9Y2H2	Phosphatidylinositide phosphatase SAC2 OS=Homo sapiens GN=INPP5F PE=1 SV=3	566.964	557.007	534.351	687.129	628.748	666.005	552.774	660.627	0.0102977	-0.257146	1.98726
P0CG29	Glutathione S-transferase theta-2 OS=Homo sapiens GN=GSTT2 PE=1 SV=1	558.358	573.717	586.398	614.584	635.923	648.763	572.824	633.09	0.010339	-0.144318	1.98552
P56181	NADH dehydrogenase [ubiquinone] flavoprotein 3, mitochondrial OS=Homo sapiens GN=NDUFV3 PE=1 SV=2	629.175	746.472	736.86	440.369	463.395	530.596	704.169	478.12	0.0103859	0.558548	1.98356
P31431	Syndecan-4 OS=Homo sapiens GN=SDC4 PE=1 SV=2	727.75	879.951	690.358	463.91	312.013	463.014	766.019	412.979	0.0105451	0.891313	1.97695
P22676	Calretinin OS=Homo sapiens GN=CALB2 PE=2 SV=2	650.325	616.728	638.206	564.72	546.456	586.189	635.086	565.789	0.0107181	0.16669	1.96988
P51648	Fatty aldehyde dehydrogenase OS=Homo sapiens GN=ALDH3A2 PE=1 SV=1	580.487	521.718	561.288	640.759	684.653	644.592	554.498	656.668	0.0111771	-0.243981	1.95167
Q8N668	COMM domain-containing protein 1 OS=Homo sapiens GN=COMMD1 PE=1 SV=1	646.171	662.055	633.277	571.007	520.846	562.073	647.168	551.309	0.01134	0.231279	1.94539
P62875	DNA-directed RNA polymerases I, II, and III subunit RPABC5 OS=Homo sapiens GN=POLR2L PE=1 SV=1	530.507	580.969	546.086	656.658	665.311	644.854	552.52	655.608	0.0114384	-0.246805	1.94163
Q9HCM4	Band 4.1-like protein 5 OS=Homo sapiens GN=EPB41L5 PE=1 SV=3	511.409	531.467	565.668	628.438	680.663	710.052	536.181	673.051	0.0123636	-0.327996	1.90785
C9JF17	Apolipoprotein D (Fragment) OS=Homo sapiens GN=APOD PE=1 SV=1	665.084	839.276	715.214	395.261	378.136	532.504	739.858	435.3	0.0129559	0.765238	1.88753
Q96BD8	Spindle and kinetochore-associated protein 1 OS=Homo sapiens GN=SKA1 PE=1 SV=1	549.336	574.758	578.828	638.189	618.376	664.287	567.641	640.284	0.0141717	-0.173734	1.84858
Q9Y6R4	Mitogen-activated protein kinase kinase kinase 4 OS=Homo sapiens GN=MAP3K4 PE=1 SV=2	610.049	637.252	648.771	567.751	555.313	576.996	632.024	566.687	0.0142934	0.157427	1.84487
A0A087X020	Ribosome maturation protein SBDS OS=Homo sapiens GN=SBDS PE=1 SV=1	638.056	698.741	660.808	469.109	555.079	540.768	665.868	521.652	0.0146756	0.352149	1.83341
Q8N1B4	Vacuolar protein sorting-associated protein 52 homolog OS=Homo sapiens GN=VPS52 PE=1 SV=1	528.193	477.17	456.955	716.407	811.337	665.688	487.439	731.144	0.0153304	-0.584933	1.81445
I3L0E3	HCG1984214, isoform CRA_a OS=Homo sapiens GN=hCG_1984214 PE=3 SV=1	437.718	534.411	474.943	648.434	805.465	725.984	482.358	726.628	0.0154076	-0.591114	1.81227
P36404	ADP-ribosylation factor-like protein 2 OS=Homo sapiens GN=ARL2 PE=1 SV=4	523.492	588.592	524.329	636.892	681.761	664.124	545.471	660.926	0.0159148	-0.276985	1.7982
Q99598	Translin-associated protein X OS=Homo sapiens GN=TSNAX PE=1 SV=1	581.017	542.801	554.632	619.914	678.713	648.524	559.483	649.05	0.0159576	-0.214235	1.79703
Q9H6J7	UPF0705 protein C11orf49 OS=Homo sapiens GN=C11orf49 PE=1 SV=2	508.565	497.873	583.861	628.527	710.714	702.251	530.1	680.497	0.0161636	-0.360325	1.79146
Q5VTR2	E3 ubiquitin-protein ligase BRE1A OS=Homo sapiens GN=RNF20 PE=1 SV=2	626.206	605.111	623.772	573.235	584.177	592.256	618.363	583.222	0.0164006	0.084408	1.78514
Q8TEW0	Partitioning defective 3 homolog OS=Homo sapiens GN=PARD3 PE=1 SV=2	587.829	575.112	555.81	617.177	656.104	627.212	572.917	633.497	0.016922	-0.145013	1.77155
Q07960	Rho GTPase-activating protein 1 OS=Homo sapiens GN=ARHGAP1 PE=1 SV=1	591.556	571.847	556.891	643.178	650.2	611.674	573.431	635.017	0.0174699	-0.147176	1.75771
P02765	Alpha-2-HS-glycoprotein OS=Homo sapiens GN=AHSG PE=1 SV=1	814.085	1038.46	730.026	395.986	93.0493	430.635	860.857	306.557	0.0179759	1.48962	1.74531
E7EQR8	Protein YIPF3 OS=Homo sapiens GN=YIPF3 PE=1 SV=1	826.695	733.887	637.994	446.382	388.916	534.136	732.859	456.478	0.0180129	0.68299	1.74442
Q9UGN5	Poly [ADP-ribose] polymerase 2 OS=Homo sapiens GN=PARP2 PE=1 SV=2	527.412	546.385	520.122	634.283	718.606	679.373	531.306	677.421	0.0188572	-0.350509	1.72452
Q9NUQ6	SPATS2-like protein OS=Homo sapiens GN=SPATS2L PE=1 SV=2	661.842	639.67	647.789	583.959	525.715	542.903	649.767	550.859	0.0189939	0.23824	1.72138
Q6PCB8	Embigin OS=Homo sapiens GN=EMB PE=1 SV=1	581.626	459.039	517.925	685.15	656.165	762.494	519.53	701.27	0.0191437	-0.432763	1.71797
Q3ZCQ8	Mitochondrial import inner membrane translocase subunit TIM50 OS=Homo sapiens GN=TIMM50 PE=1 SV=2	463.023	540.529	519.501	624.358	749.24	725.619	507.684	699.739	0.0192773	-0.462885	1.71495
Q6P1J9	Parafibromin OS=Homo sapiens GN=CDC73 PE=1 SV=1	642.651	675.338	619.419	589.106	530.894	538.54	645.803	552.847	0.0195006	0.224215	1.70995
Q12851	Mitogen-activated protein kinase kinase kinase kinase 2 OS=Homo sapiens GN=MAP4K2 PE=1 SV=2	482.969	543.879	469.286	653.166	791.594	687.008	498.711	710.589	0.0195065	-0.51081	1.70982
O15287	Fanconi anemia group G protein OS=Homo sapiens GN=FANCG PE=1 SV=1	569.08	561.535	484.824	639.578	701.807	671.603	538.48	670.996	0.0196477	-0.317413	1.70669
P54727	UV excision repair protein RAD23 homolog B OS=Homo sapiens GN=RAD23B PE=1 SV=1	730.403	660.455	655.051	573.778	457.583	523.698	681.97	518.353	0.0202826	0.395773	1.69288
Q96RY5	Protein cramped-like OS=Homo sapiens GN=CRAMP1L PE=1 SV=3	498.98	578.848	441.033	657.155	718.139	734.533	506.287	703.276	0.0204701	-0.474134	1.68888
Q92485	Acid sphingomyelinase-like phosphodiesterase 3b OS=Homo sapiens GN=SMPDL3B PE=2 SV=2	587.124	529.588	562.971	649.053	663.888	642.184	559.894	651.708	0.0205179	-0.219071	1.68787
Q96EM0	Trans-3-hydroxy-L-proline dehydratase OS=Homo sapiens GN=L3HYPDH PE=1 SV=2	718.979	635.343	647.356	548.896	537.1	508.715	667.226	531.571	0.0209295	0.327914	1.67924
Q9ULI2	Beta-citrylglutamate synthase B OS=Homo sapiens GN=RIMKLB PE=2 SV=2	482.056	514.334	583.882	633.674	678.155	738.889	526.757	683.573	0.0215268	-0.375956	1.66702
Q9H9Q2	COP9 signalosome complex subunit 7b OS=Homo sapiens GN=COPS7B PE=1 SV=1	545.93	542.404	548.128	703.207	637.818	667.029	545.487	669.351	0.0218279	-0.295218	1.66099
Q8IXS8	Protein FAM126B OS=Homo sapiens GN=FAM126B PE=1 SV=1	548.198	514.123	555.321	618.249	694.663	699.661	539.214	670.858	0.0222771	-0.315149	1.65214
P61081	NEDD8-conjugating enzyme Ubc12 OS=Homo sapiens GN=UBE2M PE=1 SV=1	526.906	556.408	554.461	621.888	663.62	699.777	545.925	661.762	0.0225896	-0.277609	1.64609
Q8TEH3	DENN domain-containing protein 1A OS=Homo sapiens GN=DENND1A PE=1 SV=2	576.182	566.827	519.419	666.243	616.502	691.091	554.143	657.945	0.0227213	-0.24771	1.64357
D6REA1	Nucleotide exchange factor SIL1 OS=Homo sapiens GN=SIL1 PE=1 SV=1	498.935	593.188	508.292	724.52	631.112	683.4	533.472	679.677	0.0227249	-0.349438	1.6435
P49459	Ubiquitin-conjugating enzyme E2 A OS=Homo sapiens GN=UBE2A PE=1 SV=2	538.802	594.378	547.17	613.392	663.623	655.896	560.117	644.304	0.0229116	-0.202013	1.63994
Q9NVT9	Armadillo repeat-containing protein 1 OS=Homo sapiens GN=ARMC1 PE=1 SV=1	534.686	594.051	561.521	650.879	657.672	620.833	563.419	643.128	0.0234081	-0.190897	1.63063
Q13535	Serine/threonine-protein kinase ATR OS=Homo sapiens GN=ATR PE=1 SV=3	550.008	584.749	506.373	623.283	698.705	654.96	547.044	658.983	0.0237705	-0.268585	1.62396
P24821	Tenascin OS=Homo sapiens GN=TNC PE=1 SV=3	648.838	766.807	655.613	412.296	557.191	495.46	690.419	488.316	0.0239501	0.499659	1.62069
Q13277	Syntaxin-3 OS=Homo sapiens GN=STX3 PE=1 SV=3	489.507	469.764	576.482	618.962	747.676	731.612	511.918	699.416	0.0244769	-0.45024	1.61124
Q9UQ03	Coronin-2B OS=Homo sapiens GN=CORO2B PE=1 SV=4	664.122	623.776	626.152	537.378	551.785	593.377	638.016	560.846	0.0245519	0.185988	1.60992
A0A0C4DGQ5	Calpain small subunit 1 OS=Homo sapiens GN=CAPNS1 PE=1 SV=1	560.392	586.245	509.038	685.577	670.338	620.042	551.892	658.652	0.0246312	-0.255131	1.60851
Q12905	Interleukin enhancer-binding factor 2 OS=Homo sapiens GN=ILF2 PE=1 SV=2	510.537	572.317	483.96	656.692	757.067	643.269	522.271	685.676	0.0248318	-0.392727	1.60499
O94826	Mitochondrial import receptor subunit TOM70 OS=Homo sapiens GN=TOMM70A PE=1 SV=1	617.584	622.7	670.956	544.655	582.239	553.328	637.08	560.074	0.0251404	0.185857	1.59963
Q9NV70	Exocyst complex component 1 OS=Homo sapiens GN=EXOC1 PE=1 SV=4	530.396	538.59	581.332	698.934	615.486	678.727	550.106	664.382	0.0251614	-0.272304	1.59927
Q9Y5W7	Sorting nexin-14 OS=Homo sapiens GN=SNX14 PE=1 SV=3	552.609	592.997	575.205	610.544	651.513	629.126	573.604	630.394	0.0269575	-0.1362	1.56932
A0A087WU02	Endoplasmic reticulum-Golgi intermediate compartment protein 2 OS=Homo sapiens GN=ERGIC2 PE=1 SV=1	369.38	429.901	473.081	642.424	842.994	888.825	424.121	791.415	0.0270966	-0.899958	1.56709
P26572	Alpha-1,3-mannosyl-glycoprotein 2-beta-N-acetylglucosaminyltransferase OS=Homo sapiens GN=MGAT1 PE=1 SV=2	661.144	707.219	688.014	435.352	500.639	564.338	685.459	500.109	0.0271027	0.454826	1.56699
E9PMS6	LIM domain only protein 7 OS=Homo sapiens GN=LMO7 PE=1 SV=1	636.159	634.329	722.106	503.656	545.039	538.866	664.198	529.187	0.0279431	0.327835	1.55372
Q9Y2B9	cAMP-dependent protein kinase inhibitor gamma OS=Homo sapiens GN=PKIG PE=2 SV=1	576.874	457.798	555.767	700.734	647.686	724.33	530.146	690.916	0.0280421	-0.382121	1.55219
Q8N0Z6	Tetratricopeptide repeat protein 5 OS=Homo sapiens GN=TTC5 PE=1 SV=2	614.633	664.905	620.191	538.628	561.851	585.752	633.243	562.077	0.0283238	0.171992	1.54785
Q13873	Bone morphogenetic protein receptor type-2 OS=Homo sapiens GN=BMPR2 PE=1 SV=2	525.211	596.836	501.493	658.487	698.177	641.657	541.18	666.107	0.0289514	-0.299645	1.53833
Q96RR4	Calcium/calmodulin-dependent protein kinase kinase 2 OS=Homo sapiens GN=CAMKK2 PE=1 SV=2	429.713	507.573	524.373	674.983	671.157	836.998	487.219	727.713	0.0293343	-0.578797	1.53262
Q969G6	Riboflavin kinase OS=Homo sapiens GN=RFK PE=1 SV=2	465.233	507.947	584.568	614.135	724.626	728.324	519.249	689.028	0.0297188	-0.408137	1.52697
Q9Y5Q8	General transcription factor 3C polypeptide 5 OS=Homo sapiens GN=GTF3C5 PE=1 SV=2	612.307	638.492	647.89	598.044	548.733	556.695	632.897	567.824	0.0300752	0.156526	1.52179
P45880	Voltage-dependent anion-selective channel protein 2 OS=Homo sapiens GN=VDAC2 PE=1 SV=2	547.372	592.517	558.13	604.829	654.919	654.275	566.006	638.008	0.0301057	-0.172756	1.52135
Q6UWS5	Protein PET117 homolog, mitochondrial OS=Homo sapiens GN=PET117 PE=3 SV=1	498.427	576.703	397.993	670.195	755.119	733.728	491.041	719.68	0.0301535	-0.551513	1.52066
A0A0A0MSE2	Hydroxyacyl-coenzyme A dehydrogenase, mitochondrial OS=Homo sapiens GN=HADH PE=1 SV=1	565.365	560.567	595.877	635.157	632.679	634.691	573.937	634.176	0.0315691	-0.143991	1.50074
Q86Y07	Serine/threonine-protein kinase VRK2 OS=Homo sapiens GN=VRK2 PE=1 SV=3	557.342	596.293	562.26	666.377	615.702	627.674	571.965	636.584	0.0321291	-0.154425	1.4931
K7ENA8	Eukaryotic translation initiation factor 3 subunit G (Fragment) OS=Homo sapiens GN=EIF3G PE=1 SV=1	679.92	657.27	650.992	522.611	492.502	585.541	662.727	533.552	0.0324464	0.312787	1.48883
P62979	Ubiquitin-40S ribosomal protein S27a OS=Homo sapiens GN=RPS27A PE=1 SV=2	742.379	617.491	666.331	553.065	549.748	470.257	675.4	524.357	0.0326655	0.365195	1.48591
Q9UFN0	Protein NipSnap homolog 3A OS=Homo sapiens GN=NIPSNAP3A PE=1 SV=2	457.419	579.945	434.279	623.251	805.497	714.632	490.547	714.46	0.0330746	-0.542461	1.48051
Q9Y296	Trafficking protein particle complex subunit 4 OS=Homo sapiens GN=TRAPPC4 PE=1 SV=1	564.073	548.879	593.689	626.788	618.821	674.523	568.88	640.044	0.0343916	-0.170047	1.46355
P49761	Dual specificity protein kinase CLK3 OS=Homo sapiens GN=CLK3 PE=1 SV=3	604.681	520.579	520.182	701.582	617.739	689.398	548.481	669.573	0.0346142	-0.2878	1.46075
A0A087WVA8	Testis-expressed sequence 2 protein OS=Homo sapiens GN=TEX2 PE=1 SV=1	620.703	657.454	625.541	599.764	546.196	550.466	634.566	565.475	0.0353795	0.166306	1.45125
B7Z7N5	Regulator of G-protein-signaling 6 OS=Homo sapiens GN=RGS6 PE=1 SV=1	630.492	705.516	648.385	508.063	592.432	481.32	661.464	527.272	0.0356775	0.327117	1.44761
F8WCF6	Protein ARPC4-TTLL3 OS=Homo sapiens GN=ARPC4-TTLL3 PE=4 SV=1	535.498	542.692	523.656	624.703	724.747	673.326	533.948	674.259	0.0358202	-0.336602	1.44587
Q96S97	Myeloid-associated differentiation marker OS=Homo sapiens GN=MYADM PE=1 SV=2	608.868	627.418	666.891	587.043	548.791	562.121	634.392	565.985	0.035914	0.164611	1.44474
Q8WXA3	RUN and FYVE domain-containing protein 2 OS=Homo sapiens GN=RUFY2 PE=1 SV=2	605.836	531.515	529.716	646.334	689.051	632.372	555.689	655.919	0.0359718	-0.23924	1.44404
M0QXF9	Branched-chain-amino-acid aminotransferase (Fragment) OS=Homo sapiens GN=BCAT2 PE=1 SV=1	512.835	594.142	548.964	670.837	643.143	655.238	551.98	656.406	0.036026	-0.249972	1.44338
Q6NXR4	TELO2-interacting protein 2 OS=Homo sapiens GN=TTI2 PE=1 SV=1	579.072	525.966	546.887	684.567	609.474	701.814	550.642	665.285	0.0362614	-0.272858	1.44056
D6RFG8	Deoxycytidine kinase OS=Homo sapiens GN=DCK PE=1 SV=1	516.062	549.223	597.877	613.08	662.588	680.708	554.387	652.125	0.0363116	-0.234255	1.43995
Q9C0J8	pre-mRNA 3' end processing protein WDR33 OS=Homo sapiens GN=WDR33 PE=1 SV=2	592.679	551.14	561.683	631.212	674.633	614.356	568.501	640.067	0.036313	-0.171061	1.43994
O95071	E3 ubiquitin-protein ligase UBR5 OS=Homo sapiens GN=UBR5 PE=1 SV=2	621.128	610.814	658.496	587.101	549.451	578.903	630.146	571.818	0.0367367	0.140129	1.4349
P46821	Microtubule-associated protein 1B OS=Homo sapiens GN=MAP1B PE=1 SV=2	657.976	662.229	616.849	551.986	590.893	507.868	645.685	550.249	0.0367604	0.230746	1.43462
P82909	28S ribosomal protein S36, mitochondrial OS=Homo sapiens GN=MRPS36 PE=1 SV=2	641.364	609.586	672.863	555.059	551.626	568.675	641.271	558.453	0.0369981	0.199498	1.43182
Q8WUN7	Ubiquitin domain-containing protein 2 OS=Homo sapiens GN=UBTD2 PE=1 SV=2	741.525	661.784	619.97	522.41	498.381	546.696	674.426	522.496	0.0371009	0.368242	1.43062
H0Y7R8	Afadin (Fragment) OS=Homo sapiens GN=MLLT4 PE=1 SV=1	621.001	650.785	634.979	522.984	570.787	584.041	635.588	559.271	0.0371361	0.184546	1.4302
H8Y6P7	GRINL1A combined protein 15 OS=Homo sapiens GN=GCOM1 PE=2 SV=1	711.705	682.56	600.322	555.004	559.924	478.694	664.862	531.208	0.037233	0.32378	1.42907
Q9NRX5	Serine incorporator 1 OS=Homo sapiens GN=SERINC1 PE=1 SV=1	422.768	579.036	541.464	769.098	661.989	670.477	514.423	700.521	0.0375828	-0.445474	1.42501
O95999	B-cell lymphoma/leukemia 10 OS=Homo sapiens GN=BCL10 PE=1 SV=1	493.054	499.979	587.162	603.592	719.655	721.937	526.732	681.728	0.0380241	-0.372129	1.41994
Q5VVQ6	Ubiquitin thioesterase OTU1 OS=Homo sapiens GN=YOD1 PE=1 SV=1	546.271	598.53	564.254	644.451	606.575	661.29	569.685	637.439	0.0385486	-0.162122	1.41399
O14657	Torsin-1B OS=Homo sapiens GN=TOR1B PE=1 SV=2	458.84	587.363	470.671	699.155	706.843	709.558	505.625	705.185	0.0390491	-0.479936	1.40839
Q16849	Receptor-type tyrosine-protein phosphatase-like N OS=Homo sapiens GN=PTPRN PE=1 SV=1	352.257	536.744	446.969	737.6	922.213	639.011	445.323	766.275	0.0394101	-0.783008	1.40439
Q9BPX5	Actin-related protein 2/3 complex subunit 5-like protein OS=Homo sapiens GN=ARPC5L PE=1 SV=1	545.209	592.21	527.547	602.528	681.47	663.034	554.989	649.011	0.039633	-0.225784	1.40194
A0A087WW76	Rho GTPase-activating protein 21 OS=Homo sapiens GN=ARHGAP21 PE=1 SV=1	526.468	596.709	569.138	664.97	638.706	626.421	564.105	643.366	0.040123	-0.189676	1.39661
P35240	Merlin OS=Homo sapiens GN=NF2 PE=1 SV=1	667.385	622.295	637.409	579.794	517.038	582.886	642.363	559.906	0.0401912	0.198205	1.39587
P14316	Interferon regulatory factor 2 OS=Homo sapiens GN=IRF2 PE=1 SV=2	760.181	598.783	724.131	502.583	460.008	551.264	694.365	504.618	0.0405134	0.460502	1.3924
P50479	PDZ and LIM domain protein 4 OS=Homo sapiens GN=PDLIM4 PE=1 SV=2	636.414	626.585	629.852	596.68	563.799	552.044	630.95	570.841	0.0407176	0.144437	1.39022
C9JFV4	Proline-, glutamic acid- and leucine-rich protein 1 OS=Homo sapiens GN=PELP1 PE=1 SV=2	627.178	625.953	714.841	540.244	516.264	567.232	655.991	541.247	0.0410791	0.277388	1.38638
Q13371	Phosducin-like protein OS=Homo sapiens GN=PDCL PE=1 SV=3	524.847	542.741	524.769	658.918	639.167	747.077	530.786	681.721	0.0412867	-0.36105	1.38419
Q9H497	Torsin-3A OS=Homo sapiens GN=TOR3A PE=1 SV=1	601.444	660.402	646.164	552.399	557.395	569.869	636.003	559.888	0.0413215	0.183896	1.38382
Q9NYL2	Mitogen-activated protein kinase kinase kinase MLT OS=Homo sapiens GN=ZAK PE=1 SV=3	563.562	576.542	519.085	671.544	694.578	603.318	553.063	656.48	0.0421002	-0.247307	1.37572
Q7L9L4	MOB kinase activator 1B OS=Homo sapiens GN=MOB1B PE=1 SV=3	545.339	551.082	590.285	647.516	608.967	687.698	562.235	648.06	0.0421213	-0.204954	1.3755
Q14CZ7	FAST kinase domain-containing protein 3 OS=Homo sapiens GN=FASTKD3 PE=1 SV=2	547.644	604.16	558.935	642.003	651.462	612.288	570.246	635.251	0.0424935	-0.155742	1.37168
Q9UJY5	ADP-ribosylation factor-binding protein GGA1 OS=Homo sapiens GN=GGA1 PE=1 SV=1	501.993	601.064	509.579	606.821	702.353	687.976	537.545	665.717	0.0425426	-0.308521	1.37118
Q9Y3D9	28S ribosomal protein S23, mitochondrial OS=Homo sapiens GN=MRPS23 PE=1 SV=2	539.895	552.288	447.162	740.989	764.765	602.149	513.115	702.635	0.0432108	-0.453492	1.36441
P61812	Transforming growth factor beta-2 OS=Homo sapiens GN=TGFB2 PE=1 SV=1	773.724	742.588	597.319	474.61	519.22	455.905	704.544	483.245	0.0433887	0.543935	1.36262
P05023	Sodium/potassium-transporting ATPase subunit alpha-1 OS=Homo sapiens GN=ATP1A1 PE=1 SV=1	591.522	599.723	583.437	621.154	602.295	618.131	591.561	613.86	0.043464	-0.0533842	1.36187
A6NEM2	Host cell factor 1 OS=Homo sapiens GN=HCFC1 PE=1 SV=2	605.918	623.39	656.87	578.88	557.087	578.503	628.726	571.49	0.0435839	0.137703	1.36067
Q9H9A5	CCR4-NOT transcription complex subunit 10 OS=Homo sapiens GN=CNOT10 PE=1 SV=1	579.967	581.774	553.017	620.914	667.452	614.445	571.586	634.27	0.0436259	-0.150127	1.36026
Q9BZX2	Uridine-cytidine kinase 2 OS=Homo sapiens GN=UCK2 PE=1 SV=1	538.182	558.677	550.868	606.892	685.85	677.956	549.242	656.9	0.043885	-0.25823	1.35768
P63173	60S ribosomal protein L38 OS=Homo sapiens GN=RPL38 PE=1 SV=2	647.448	728.352	611.579	557.68	475.952	561.523	662.46	531.718	0.0445117	0.31717	1.35153
P30566	Adenylosuccinate lyase OS=Homo sapiens GN=ADSL PE=1 SV=2	694.397	622.44	624.431	584.503	516.352	567.073	647.089	555.976	0.044624	0.218943	1.35043
Q7Z4R8	UPF0669 protein C6orf120 OS=Homo sapiens GN=C6orf120 PE=1 SV=1	477.259	478.299	584.853	656.402	797.064	640.385	513.47	697.95	0.044769	-0.442844	1.34902
Q9H0C8	Integrin-linked kinase-associated serine/threonine phosphatase 2C OS=Homo sapiens GN=ILKAP PE=1 SV=1	588.999	525.001	577.491	614.743	683.404	637.137	563.83	645.094	0.0450877	-0.194249	1.34594
Q08170	Serine/arginine-rich splicing factor 4 OS=Homo sapiens GN=SRSF4 PE=1 SV=2	665.944	641.202	609.862	593.121	524.776	571.503	639.003	563.133	0.0451967	0.182346	1.34489
Q8IWT3	Cullin-9 OS=Homo sapiens GN=CUL9 PE=1 SV=2	514.906	557.203	529.809	615.834	667.484	737.964	533.973	673.761	0.0461397	-0.33547	1.33593
P07954	Fumarate hydratase, mitochondrial OS=Homo sapiens GN=FH PE=1 SV=3	659.516	642.577	610.061	589.428	576.593	523.009	637.385	563.01	0.0464119	0.179004	1.33337
Q9BRG1	Vacuolar protein-sorting-associated protein 25 OS=Homo sapiens GN=VPS25 PE=1 SV=1	598.189	538.451	581.069	633.366	660.821	616.845	572.57	637.011	0.0475663	-0.153867	1.3227
A0A087WUE4	Leukocyte receptor cluster member 8 OS=Homo sapiens GN=LENG8 PE=1 SV=1	510.025	603.618	519.112	638.126	716.129	626.345	544.252	660.2	0.0476366	-0.27863	1.32206
Q9H0D6	5'-3' exoribonuclease 2 OS=Homo sapiens GN=XRN2 PE=1 SV=1	591.392	578.707	571.68	653.9	619.42	611.881	580.593	628.4	0.0488058	-0.114158	1.31153
Q96M83	Coiled-coil domain-containing protein 7 OS=Homo sapiens GN=CCDC7 PE=2 SV=2	452.689	605.003	421.331	681.822	733.106	732.818	493.008	715.915	0.0491603	-0.538179	1.30839
Q9NSY2	StAR-related lipid transfer protein 5 OS=Homo sapiens GN=STARD5 PE=1 SV=2	482.587	550.137	502.517	660.746	794.511	634.457	511.747	696.571	0.0495918	-0.44484	1.30459
Q15059	Bromodomain-containing protein 3 OS=Homo sapiens GN=BRD3 PE=1 SV=1	596.628	550.028	578.222	638.028	605.632	662.89	574.959	635.517	0.0496011	-0.14447	1.30451
O00629	Importin subunit alpha-3 OS=Homo sapiens GN=KPNA4 PE=1 SV=1	621.021	617.415	630.965	577.539	558.194	598.909	623.133	578.214	0.0498778	0.107938	1.30209
Q9ULJ7	Ankyrin repeat domain-containing protein 50 OS=Homo sapiens GN=ANKRD50 PE=1 SV=4	593.915	671.079	662.49	563.529	516.021	582.035	642.495	553.862	0.0499782	0.214159	1.30122
P16989	Y-box-binding protein 3 OS=Homo sapiens GN=YBX3 PE=1 SV=4	593.499	696.951	686.13	476.569	520.413	590.796	658.86	529.259	0.0501979	0.315997	1.29931
O15360	Fanconi anemia group A protein OS=Homo sapiens GN=FANCA PE=1 SV=2	559.222	562.36	562.097	611.547	645.616	680.209	561.226	645.791	0.0504543	-0.202484	1.2971
J3KNF5	Centrosomal protein of 290 kDa OS=Homo sapiens GN=CEP290 PE=1 SV=1	658.608	630.669	825.913	470.397	417.108	574.227	705.063	487.244	0.0504814	0.533108	1.29687
P49773	Histidine triad nucleotide-binding protein 1 OS=Homo sapiens GN=HINT1 PE=1 SV=2	635.614	622.786	739.54	549.852	543.582	498.91	665.98	530.781	0.0505221	0.327361	1.29652
O60934	Nibrin OS=Homo sapiens GN=NBN PE=1 SV=1	555.874	568.303	581.025	605.245	668.926	635.683	568.401	636.618	0.0506437	-0.16352	1.29547
Q9NQH7	Probable Xaa-Pro aminopeptidase 3 OS=Homo sapiens GN=XPNPEP3 PE=1 SV=1	524.949	607.896	543.055	657.408	623.424	664.875	558.633	648.569	0.0507168	-0.215359	1.29485
Q9Y255	PRELI domain-containing protein 1, mitochondrial OS=Homo sapiens GN=PRELID1 PE=1 SV=1	464.054	586.156	504.926	641.883	780.557	635.913	518.379	686.117	0.05147	-0.404449	1.28845
Q8N1F7	Nuclear pore complex protein Nup93 OS=Homo sapiens GN=NUP93 PE=1 SV=2	604.541	615.635	603.809	599.043	590.766	594.043	607.995	594.618	0.0515309	0.032097	1.28793
Q07817	Bcl-2-like protein 1 OS=Homo sapiens GN=BCL2L1 PE=1 SV=1	611.546	627.26	640.917	542.168	597.272	571.869	626.574	570.436	0.0516429	0.13542	1.28699
P62304	Small nuclear ribonucleoprotein E OS=Homo sapiens GN=SNRPE PE=1 SV=1	577.542	548.427	510.544	598.374	710.559	675.73	545.504	661.554	0.0516433	-0.278269	1.28699
D6REX3	Protein transport protein Sec31A OS=Homo sapiens GN=SEC31A PE=1 SV=1	602.146	574.184	556.65	659.89	627.66	609.376	577.66	632.308	0.0517846	-0.130408	1.2858
Q6XE24	RNA-binding motif, single-stranded-interacting protein 3 OS=Homo sapiens GN=RBMS3 PE=1 SV=1	645.124	625.258	666.099	505.536	597.873	543.225	645.493	548.878	0.0519914	0.233917	1.28407
Q9H0U9	Testis-specific Y-encoded-like protein 1 OS=Homo sapiens GN=TSPYL1 PE=1 SV=3	613.721	668.49	665.604	496.143	531.635	600.267	649.272	542.682	0.0521587	0.258716	1.28267
P42575	Caspase-2 OS=Homo sapiens GN=CASP2 PE=1 SV=2	566.56	594.079	554.014	645.317	660.037	599.524	571.551	634.959	0.0522146	-0.151782	1.28221
P09486	SPARC OS=Homo sapiens GN=SPARC PE=1 SV=1	665.18	694.4	673.785	473.104	593.426	460.835	677.788	509.122	0.0523588	0.412823	1.28101
P51965	Ubiquitin-conjugating enzyme E2 E1 OS=Homo sapiens GN=UBE2E1 PE=1 SV=1	595.929	761.715	747.975	475.629	486.092	479.325	701.873	480.349	0.0525329	0.547127	1.27957
Q86Y56	Dynein assembly factor 5, axonemal OS=Homo sapiens GN=DNAAF5 PE=1 SV=4	531.076	591.74	574.288	604.545	637.907	672.396	565.701	638.283	0.0530346	-0.174156	1.27544
Q7Z4F1	Low-density lipoprotein receptor-related protein 10 OS=Homo sapiens GN=LRP10 PE=1 SV=2	437.456	565.499	553.126	779.696	604.699	713.375	518.694	699.257	0.0533324	-0.430939	1.27301
A0A0B4J291	Chromodomain Y-like protein 2 OS=Homo sapiens GN=CDYL2 PE=1 SV=1	712.42	652.159	862.808	524.86	290.251	547.519	742.463	454.21	0.0533607	0.708959	1.27278
Q86V21	Acetoacetyl-CoA synthetase OS=Homo sapiens GN=AACS PE=1 SV=1	648.672	636.796	643.658	575.885	514.919	582.069	643.042	557.624	0.0542399	0.20562	1.26568
P56192	Methionine--tRNA ligase, cytoplasmic OS=Homo sapiens GN=MARS PE=1 SV=2	688.977	600.557	686.346	537.904	540.697	544.174	658.627	540.925	0.0553171	0.284033	1.25714
Q9H3Q1	Cdc42 effector protein 4 OS=Homo sapiens GN=CDC42EP4 PE=1 SV=1	703.125	703.596	642.969	508.52	591.793	418.431	683.23	506.248	0.0560086	0.432528	1.25175
Q9BZK3	Putative nascent polypeptide-associated complex subunit alpha-like protein OS=Homo sapiens GN=NACAP1 PE=5 SV=1	519.311	597.375	520.702	621.344	722.322	630.161	545.796	657.942	0.0561538	-0.2696	1.25062
P61803	Dolichyl-diphosphooligosaccharide--protein glycosyltransferase subunit DAD1 OS=Homo sapiens GN=DAD1 PE=1 SV=3	517.42	574.599	557.574	681.652	597.696	705.841	549.865	661.73	0.0562491	-0.267166	1.24988
Q96GW9	Methionine--tRNA ligase, mitochondrial OS=Homo sapiens GN=MARS2 PE=1 SV=2	596.35	571.478	588.068	602.412	637.865	620.154	585.298	620.144	0.0562752	-0.0834304	1.24968
Q9UM82	Spermatogenesis-associated protein 2 OS=Homo sapiens GN=SPATA2 PE=1 SV=2	528.497	573.5	600.645	622.179	626.672	666.826	567.547	638.559	0.0568052	-0.170079	1.24561
Q6STE5	SWI/SNF-related matrix-associated actin-dependent regulator of chromatin subfamily D member 3 OS=Homo sapiens GN=SMARCD3 PE=1 SV=1	655.348	655.371	645.708	506.507	523.422	597.481	652.142	542.47	0.0574124	0.265643	1.24099
O00303	Eukaryotic translation initiation factor 3 subunit F OS=Homo sapiens GN=EIF3F PE=1 SV=1	555.818	602.9	537.713	603.324	670.503	639.589	565.477	637.805	0.057976	-0.173647	1.23675
Q9NRG7	Epimerase family protein SDR39U1 OS=Homo sapiens GN=SDR39U1 PE=1 SV=2	522.525	529.186	565.203	598.34	721.75	682.557	538.971	667.549	0.0579968	-0.308665	1.2366
Q9BUT1	3-hydroxybutyrate dehydrogenase type 2 OS=Homo sapiens GN=BDH2 PE=1 SV=2	572.133	519.162	555.426	649.417	724.884	611.869	548.907	662.057	0.0580357	-0.270393	1.2363
Q9Y678	Coatomer subunit gamma-1 OS=Homo sapiens GN=COPG1 PE=1 SV=1	598.618	660.278	630.485	546.387	598.938	549.798	629.794	565.041	0.0581879	0.156524	1.23517
Q92793	CREB-binding protein OS=Homo sapiens GN=CREBBP PE=1 SV=3	673.273	680.969	637.271	570.311	461.323	572.496	663.838	534.71	0.058316	0.312075	1.23421
P35219	Carbonic anhydrase-related protein OS=Homo sapiens GN=CA8 PE=1 SV=3	532.318	607.896	466.588	699.264	641.795	686.401	535.6	675.82	0.0586147	-0.335482	1.23199
P51946	Cyclin-H OS=Homo sapiens GN=CCNH PE=1 SV=1	578.957	528.368	586.385	609.852	634.602	689.862	564.57	644.772	0.0586717	-0.191636	1.23157
Q5SRQ6	Casein kinase II subunit beta OS=Homo sapiens GN=CSNK2B PE=1 SV=2	582.112	725.331	696.511	465.079	500.416	586.593	667.985	517.363	0.0587236	0.368639	1.23119
Q96C24	Synaptotagmin-like protein 4 OS=Homo sapiens GN=SYTL4 PE=1 SV=2	596.168	671.432	649.465	517.97	545.567	598.568	639.022	554.035	0.0594806	0.205888	1.22562
Q9H1A3	Methyltransferase-like protein 9 OS=Homo sapiens GN=METTL9 PE=2 SV=1	601.173	553.475	547.439	666.24	598.659	672.016	567.362	645.638	0.0601419	-0.186457	1.22082
Q8WY22	BRI3-binding protein OS=Homo sapiens GN=BRI3BP PE=1 SV=1	528.262	532.868	462.613	805.748	734.282	601.221	507.914	713.751	0.0608338	-0.490835	1.21585
O14732	Inositol monophosphatase 2 OS=Homo sapiens GN=IMPA2 PE=1 SV=1	542.211	596.207	503.024	614.969	720.142	635.703	547.147	656.938	0.0609595	-0.263829	1.21496
P13984	General transcription factor IIF subunit 2 OS=Homo sapiens GN=GTF2F2 PE=1 SV=2	658.265	663.74	642.355	554.841	485.934	589.081	654.787	543.285	0.0610195	0.269315	1.21453
Q9UMX5	Neudesin OS=Homo sapiens GN=NENF PE=1 SV=1	822.9	586.517	728.487	535.654	519.191	409.349	712.635	488.065	0.0613359	0.54609	1.21229
Q9BZM5	NKG2D ligand 2 OS=Homo sapiens GN=ULBP2 PE=1 SV=1	487.478	574.233	502.52	605.334	773.45	667.56	521.411	682.115	0.0615035	-0.387594	1.2111
Q9HAZ1	Dual specificity protein kinase CLK4 OS=Homo sapiens GN=CLK4 PE=1 SV=1	507.638	558.456	514.792	601.82	754.757	677.01	526.962	677.862	0.0624333	-0.363294	1.20458
P51610	Host cell factor 1 OS=Homo sapiens GN=HCFC1 PE=1 SV=2	602.22	623.767	656.012	576.326	563.306	577.967	627.333	572.533	0.0624493	0.131873	1.20447
Q5T4U5	Acyl-Coenzyme A dehydrogenase, C-4 to C-12 straight chain, isoform CRA_a OS=Homo sapiens GN=ACADM PE=1 SV=1	599.419	666.079	626.964	529.67	592.15	566.536	630.821	562.785	0.0624746	0.164645	1.2043
O95633	Follistatin-related protein 3 OS=Homo sapiens GN=FSTL3 PE=1 SV=1	694.512	597.537	805.124	588.478	471.419	447.869	699.058	502.589	0.0625625	0.476034	1.20369
P05455	Lupus La protein OS=Homo sapiens GN=SSB PE=1 SV=2	665.456	686.158	586.185	511.596	562.126	567.866	645.933	547.196	0.0625709	0.239327	1.20363
A0A0A0MSG2	Four and a half LIM domains protein 2 OS=Homo sapiens GN=FHL2 PE=1 SV=1	655.42	625.294	835.164	514.104	397.131	560.082	705.293	490.439	0.0629117	0.52415	1.20127
F5H269	DmX-like protein 1 OS=Homo sapiens GN=DMXL1 PE=1 SV=1	502.963	605.661	553.985	626.826	680.232	641.006	554.203	649.355	0.0646532	-0.228593	1.18941
Q13057	Bifunctional coenzyme A synthase OS=Homo sapiens GN=COASY PE=1 SV=4	610.945	565.686	553.951	656.164	634.003	610.328	576.86	633.498	0.0647476	-0.135119	1.18878
Q9NZU5	LIM and cysteine-rich domains protein 1 OS=Homo sapiens GN=LMCD1 PE=1 SV=1	680.265	599.901	638.452	595.464	561.05	536.581	639.539	564.365	0.06479	0.180405	1.18849
P30740	Leukocyte elastase inhibitor OS=Homo sapiens GN=SERPINB1 PE=1 SV=1	591.532	590.818	530.173	653.413	653.014	605.745	570.841	637.391	0.0648012	-0.159089	1.18842
Q9H8W3	Protein FAM204A OS=Homo sapiens GN=FAM204A PE=2 SV=1	575.338	774.937	816.361	493.115	445.352	439.129	722.212	459.198	0.0649337	0.653305	1.18753
A0A0G2JPT5	Cell cycle checkpoint protein RAD17 OS=Homo sapiens GN=RAD17 PE=1 SV=1	476.39	600.737	551.219	635.895	686.505	662.082	542.782	661.494	0.0657321	-0.285355	1.18222
Q7Z4T8	Inactive polypeptide N-acetylgalactosaminyltransferase-like protein 5 OS=Homo sapiens GN=GALNTL5 PE=2 SV=3	631.142	679.258	640.727	528.394	605.019	491.333	650.376	541.582	0.0657448	0.264093	1.18214
P53675	Clathrin heavy chain 2 OS=Homo sapiens GN=CLTCL1 PE=1 SV=2	538.225	587.445	595.966	628.245	649.992	614.986	573.879	631.074	0.0657744	-0.137065	1.18194
O75955	Flotillin-1 OS=Homo sapiens GN=FLOT1 PE=1 SV=3	580.929	583.783	515.169	619.027	696.989	621.555	559.96	645.857	0.0660069	-0.20589	1.18041
Q9NRG9	Aladin OS=Homo sapiens GN=AAAS PE=1 SV=1	536.551	604.488	523.856	598.207	654.281	693.193	554.965	648.56	0.0663851	-0.224844	1.17793
Q7Z2E3	Aprataxin OS=Homo sapiens GN=APTX PE=1 SV=2	567.489	581.882	519.137	646.723	705.312	601.372	556.169	651.136	0.0668018	-0.227434	1.17521
Q13243	Serine/arginine-rich splicing factor 5 OS=Homo sapiens GN=SRSF5 PE=1 SV=1	601.551	582.711	545.168	642.357	624.471	629.492	576.477	632.107	0.0668634	-0.132906	1.17481
O00116	Alkyldihydroxyacetonephosphate synthase, peroxisomal OS=Homo sapiens GN=AGPS PE=1 SV=1	643.349	600.577	647.349	592.335	539.282	588.466	630.425	573.361	0.0669112	0.136881	1.1745
P20393	Nuclear receptor subfamily 1 group D member 1 OS=Homo sapiens GN=NR1D1 PE=1 SV=1	625.397	795.942	1027.02	393.972	107.23	581.693	816.12	360.965	0.0669832	1.17692	1.17403
F8WA39	Myotubularin-related protein 1 OS=Homo sapiens GN=MTMR1 PE=1 SV=1	504.175	544.711	527.461	635.334	772.73	637.129	525.449	681.731	0.0671644	-0.375651	1.17286
P36871	Phosphoglucomutase-1 OS=Homo sapiens GN=PGM1 PE=1 SV=3	694.038	610.26	621.857	556.617	533.968	588.906	642.052	559.83	0.0677008	0.1977	1.16941
Q16533	snRNA-activating protein complex subunit 1 OS=Homo sapiens GN=SNAPC1 PE=1 SV=1	487.135	599.067	466.905	805.84	604.436	695.176	517.702	701.817	0.0679465	-0.438973	1.16783
B8ZZN6	Small ubiquitin-related modifier 1 OS=Homo sapiens GN=SUMO1 PE=1 SV=1	749.621	633.127	623.392	511.05	541.525	533.156	668.713	528.577	0.0680966	0.339274	1.16687
Q9NPD3	Exosome complex component RRP41 OS=Homo sapiens GN=EXOSC4 PE=1 SV=3	560.252	565.788	585.53	676.115	602.074	644.197	570.523	640.796	0.0683054	-0.167578	1.16554
P49711	Transcriptional repressor CTCF OS=Homo sapiens GN=CTCF PE=1 SV=1	768.957	637.106	737.456	610.81	362.897	497.741	714.507	490.483	0.0685566	0.542745	1.16395
Q13242	Serine/arginine-rich splicing factor 9 OS=Homo sapiens GN=SRSF9 PE=1 SV=1	599.97	428.712	536.876	655.727	793.3	637.439	521.853	695.489	0.068564	-0.414384	1.1639
Q9UKY7	Protein CDV3 homolog OS=Homo sapiens GN=CDV3 PE=1 SV=1	590.486	721.76	799.836	346.62	479.143	590.326	704.027	472.03	0.0688608	0.576754	1.16203
P35221	Catenin alpha-1 OS=Homo sapiens GN=CTNNA1 PE=1 SV=1	572.562	537.078	602.946	602.136	664.834	641.148	570.862	636.039	0.0690595	-0.155974	1.16078
Q14137	Ribosome biogenesis protein BOP1 OS=Homo sapiens GN=BOP1 PE=1 SV=2	560.669	586.492	582.085	599.813	627.364	656.578	576.416	627.918	0.0691813	-0.123467	1.16001
O75821	Eukaryotic translation initiation factor 3 subunit G OS=Homo sapiens GN=EIF3G PE=1 SV=2	663.27	615.158	631.679	518.803	562.027	602.935	636.702	561.255	0.0693914	0.181963	1.15869
Q12894	Interferon-related developmental regulator 2 OS=Homo sapiens GN=IFRD2 PE=1 SV=3	535.856	585.89	542.499	601.934	705.314	638.661	554.748	648.636	0.0703875	-0.225577	1.1525
Q8N4V2	Synaptic vesicle 2-related protein OS=Homo sapiens GN=SVOP PE=2 SV=1	561.395	528.392	548.655	746.173	619.089	653.897	546.147	673.053	0.0708963	-0.30143	1.14938
Q5H8A4	GPI ethanolamine phosphate transferase 2 OS=Homo sapiens GN=PIGG PE=1 SV=1	569.213	594.874	492.499	606.635	699.324	651.387	552.195	652.449	0.0709589	-0.240685	1.14899
Q9BY41	Histone deacetylase 8 OS=Homo sapiens GN=HDAC8 PE=1 SV=2	459.743	580.972	539.708	588.687	751.128	683.942	526.808	674.586	0.0712539	-0.356726	1.14719
Q9BZJ0	Crooked neck-like protein 1 OS=Homo sapiens GN=CRNKL1 PE=1 SV=4	567.856	547.542	591.449	637.009	602.822	683.835	568.949	641.222	0.0713198	-0.172524	1.14679
O00512	B-cell CLL/lymphoma 9 protein OS=Homo sapiens GN=BCL9 PE=1 SV=4	611.412	744.677	623.539	512.678	565.99	503.269	659.876	527.312	0.0714208	0.323538	1.14618
P62633	Cellular nucleic acid-binding protein OS=Homo sapiens GN=CNBP PE=1 SV=1	879.459	591.53	772.644	551.746	527.076	278.27	747.878	452.364	0.071441	0.725318	1.14605
Q15742	NGFI-A-binding protein 2 OS=Homo sapiens GN=NAB2 PE=1 SV=1	398.308	516.928	420.692	640.583	958.358	686.383	445.309	761.775	0.0717587	-0.774557	1.14413
Q92905	COP9 signalosome complex subunit 5 OS=Homo sapiens GN=COPS5 PE=1 SV=4	537.824	580.927	556.64	641.835	603.719	704.791	558.464	650.115	0.0730931	-0.219231	1.13612
Q14191	Werner syndrome ATP-dependent helicase OS=Homo sapiens GN=WRN PE=1 SV=2	636.079	650.567	592.398	567.008	586.298	562.987	626.348	572.098	0.0739515	0.130702	1.13105
Q9Y2T2	AP-3 complex subunit mu-1 OS=Homo sapiens GN=AP3M1 PE=1 SV=1	475.783	590.307	514.874	596.35	763.481	663.894	526.988	674.575	0.0745203	-0.356209	1.12773
Q96ST2	Protein IWS1 homolog OS=Homo sapiens GN=IWS1 PE=1 SV=2	628.395	666.661	656.637	586.986	571.674	480.827	650.564	546.496	0.0752201	0.251481	1.12367
Q8NFV4	Alpha/beta hydrolase domain-containing protein 11 OS=Homo sapiens GN=ABHD11 PE=1 SV=1	586.603	777.214	666.79	531.472	457.114	542.921	676.869	510.502	0.0761724	0.406959	1.1182
P01733	T-cell receptor beta chain V region YT35 OS=Homo sapiens GN=TRBV12-3 PE=1 SV=1	608.327	780.846	639.284	446.298	602.309	459.294	676.152	502.634	0.0762723	0.427841	1.11763
Q9NXG2	THUMP domain-containing protein 1 OS=Homo sapiens GN=THUMPD1 PE=1 SV=2	641.327	592.772	688.643	540.638	596.924	535.305	640.914	557.623	0.0771188	0.200842	1.11284
Q9Y3A6	Transmembrane emp24 domain-containing protein 5 OS=Homo sapiens GN=TMED5 PE=1 SV=1	710.718	577.626	772.005	556.871	444.448	547.077	686.783	516.132	0.0771596	0.412113	1.11261
Q6UUV7	CREB-regulated transcription coactivator 3 OS=Homo sapiens GN=CRTC3 PE=1 SV=2	666.172	625.62	598.873	591.45	575.885	548.636	630.221	571.99	0.07721	0.139868	1.11233
Q9UG63	ATP-binding cassette sub-family F member 2 OS=Homo sapiens GN=ABCF2 PE=1 SV=2	608.976	574.303	568.732	614.223	610.968	644.549	584.004	623.247	0.078025	-0.0938267	1.10777
P23634	Plasma membrane calcium-transporting ATPase 4 OS=Homo sapiens GN=ATP2B4 PE=1 SV=2	613.868	543.295	558.649	633.158	652.256	629.055	571.937	638.156	0.0784026	-0.158053	1.10567
O95243	Methyl-CpG-binding domain protein 4 OS=Homo sapiens GN=MBD4 PE=1 SV=1	424.935	622.774	506.807	680.022	647.215	739.954	518.172	689.064	0.0784752	-0.411207	1.10527
Q9H6R0	Putative ATP-dependent RNA helicase DHX33 OS=Homo sapiens GN=DHX33 PE=1 SV=2	495.167	570.451	525.891	623.578	770.233	628.094	530.503	673.968	0.0789798	-0.345319	1.10248
A0A0C4DGV5	Zinc finger Ran-binding domain-containing protein 2 OS=Homo sapiens GN=ZRANB2 PE=1 SV=1	581.612	662.708	697.185	527.001	522.409	589.788	647.168	546.399	0.0793386	0.244185	1.10052
Q9Y2L5	Trafficking protein particle complex subunit 8 OS=Homo sapiens GN=TRAPPC8 PE=1 SV=2	551.169	530.776	592.149	605.144	635.281	711.078	558.031	650.501	0.0793896	-0.221206	1.10024
F8W6H6	Unconventional myosin-Va OS=Homo sapiens GN=MYO5A PE=1 SV=2	596.217	559.547	599.308	621.256	608.172	639.631	585.024	623.02	0.0794019	-0.0907822	1.10017
Q96PE3	Type I inositol 3,4-bisphosphate 4-phosphatase OS=Homo sapiens GN=INPP4A PE=1 SV=1	609.677	575.028	534.972	654.974	619.989	636.601	573.226	637.188	0.0794521	-0.152616	1.09989
A9Z1X7	Serine/arginine repetitive matrix protein 1 OS=Homo sapiens GN=SRRM1 PE=1 SV=1	624.477	616.45	784.3	455.95	552.548	535.934	675.075	514.811	0.0797139	0.391007	1.09847
Q8NHG7	Small VCP/p97-interacting protein OS=Homo sapiens GN=SVIP PE=1 SV=1	714.748	799.751	584.209	469.981	605.88	367.652	699.569	481.171	0.0797295	0.539918	1.09838
Q66K74	Microtubule-associated protein 1S OS=Homo sapiens GN=MAP1S PE=1 SV=2	654.397	645.662	626.331	595.282	507.4	576.549	642.13	559.744	0.0800177	0.198099	1.09681
Q14318	Peptidyl-prolyl cis-trans isomerase FKBP8 OS=Homo sapiens GN=FKBP8 PE=1 SV=2	595.638	700.773	652.905	565.085	481.706	589.728	649.772	545.507	0.0800502	0.252338	1.09664
Q9BXS4	Transmembrane protein 59 OS=Homo sapiens GN=TMEM59 PE=1 SV=1	500.687	465.746	485.902	876.5	597.494	776.305	484.112	750.099	0.0804487	-0.631742	1.09448
Q8NE01	Metal transporter CNNM3 OS=Homo sapiens GN=CNNM3 PE=1 SV=1	601.711	581.66	531.456	604.316	638.318	661.392	571.609	634.675	0.0806352	-0.15099	1.09348
D4Q8H0	Mitogen-activated protein kinase kinase kinase MLT OS=Homo sapiens GN=pk PE=1 SV=1	546.297	580.007	503.486	663.577	737.532	592.988	543.264	664.699	0.0812683	-0.29105	1.09008
Q9H3S7	Tyrosine-protein phosphatase non-receptor type 23 OS=Homo sapiens GN=PTPN23 PE=1 SV=1	557.614	566.332	605.702	637.631	597.686	660.318	576.549	631.878	0.0813271	-0.132202	1.08976
Q4LDG9	Dynein light chain 1, axonemal OS=Homo sapiens GN=DNAL1 PE=1 SV=1	636.264	665.884	643.622	519.5	610.717	500.782	648.59	543.666	0.0822336	0.254586	1.08495
Q8N4L1	Transmembrane protein 151A OS=Homo sapiens GN=TMEM151A PE=2 SV=1	383.728	502.186	516.861	575.861	893.798	737.297	467.591	735.652	0.0822965	-0.653775	1.08462
Q96S82	Ubiquitin-like protein 7 OS=Homo sapiens GN=UBL7 PE=1 SV=2	565.719	796.89	701.123	436.86	508.771	523.149	687.911	489.593	0.0824798	0.490637	1.08365
A0A087X1Z3	Proteasome activator complex subunit 2 OS=Homo sapiens GN=PSME2 PE=1 SV=1	551.479	594.067	579.022	656.41	592.955	650.724	574.856	633.363	0.0827054	-0.139832	1.08247
O00217	NADH dehydrogenase [ubiquinone] iron-sulfur protein 8, mitochondrial OS=Homo sapiens GN=NDUFS8 PE=1 SV=1	558.963	551.229	602.239	640.593	597.584	679.109	570.81	639.096	0.0830278	-0.163021	1.08078
Q8N5U6	RING finger protein 10 OS=Homo sapiens GN=RNF10 PE=1 SV=2	504.32	540.754	444.259	679.31	854.883	607.397	496.444	713.863	0.0831376	-0.524016	1.0802
O60294	tRNA wybutosine-synthesizing protein 4 OS=Homo sapiens GN=LCMT2 PE=1 SV=3	552.285	607.166	444.117	646.056	725.854	644.454	534.523	672.121	0.0834013	-0.330471	1.07883
A0AVF1	Intraflagellar transport protein 56 OS=Homo sapiens GN=TTC26 PE=2 SV=1	486.895	611.805	452.008	765.079	576.756	758.706	516.903	700.18	0.0835481	-0.437834	1.07806
Q9UK73	Protein fem-1 homolog B OS=Homo sapiens GN=FEM1B PE=1 SV=1	583.621	556.107	490.28	596.433	738.718	653.337	543.336	662.829	0.0835914	-0.286794	1.07784
Q8WUH6	Transmembrane protein 263 OS=Homo sapiens GN=TMEM263 PE=1 SV=1	558.123	605.063	511.042	608.952	698.009	629.206	558.076	645.389	0.0845387	-0.209707	1.07294
Q9NWY4	UPF0609 protein C4orf27 OS=Homo sapiens GN=C4orf27 PE=1 SV=2	535.571	602.804	481.481	677.708	736.184	589.094	539.952	667.662	0.0846472	-0.306287	1.07239
F6WQW2	Ran-specific GTPase-activating protein OS=Homo sapiens GN=RANBP1 PE=1 SV=1	662.565	641.218	664.398	475.545	608.249	521.332	656.06	535.042	0.0848097	0.294177	1.07155
Q96QD8	Sodium-coupled neutral amino acid transporter 2 OS=Homo sapiens GN=SLC38A2 PE=1 SV=2	525.199	620.379	492.866	631.614	713.437	627.232	546.148	657.428	0.0848314	-0.26754	1.07144
P02794	Ferritin heavy chain OS=Homo sapiens GN=FTH1 PE=1 SV=2	607.488	535.321	567.039	606.543	679.11	628.77	569.949	638.141	0.0851195	-0.163043	1.06997
Q8NCE0	tRNA-splicing endonuclease subunit Sen2 OS=Homo sapiens GN=TSEN2 PE=1 SV=2	483.04	580.306	587.095	600.171	702.371	653.955	550.147	652.166	0.0858302	-0.245422	1.06636
Q6GMV3	Putative peptidyl-tRNA hydrolase PTRHD1 OS=Homo sapiens GN=PTRHD1 PE=1 SV=1	537.591	857.843	754.411	348.05	479.603	521.471	716.615	449.708	0.0864133	0.67221	1.06342
Q03393	6-pyruvoyl tetrahydrobiopterin synthase OS=Homo sapiens GN=PTS PE=1 SV=1	448.794	601.591	540.969	632.35	626.039	767.343	530.451	675.244	0.0865712	-0.348189	1.06263
G3V180	Dipeptidyl peptidase 3 OS=Homo sapiens GN=DPP3 PE=1 SV=1	537.688	563.637	603.863	618.967	610.747	686.295	568.396	638.67	0.0870761	-0.168175	1.0601
Q03113	Guanine nucleotide-binding protein subunit alpha-12 OS=Homo sapiens GN=GNA12 PE=1 SV=4	534.638	595.865	560.341	592.753	684.14	638.553	563.615	638.482	0.0873832	-0.179938	1.05857
P53701	Cytochrome c-type heme lyase OS=Homo sapiens GN=HCCS PE=1 SV=1	664.971	740.479	727.429	536.531	328.653	580.264	710.959	481.816	0.0876466	0.561284	1.05726
Q8N398	von Willebrand factor A domain-containing protein 5B2 OS=Homo sapiens GN=VWA5B2 PE=2 SV=2	459.144	602.413	562.239	611.49	667.53	705.358	541.265	661.459	0.0879654	-0.289317	1.05569
P43358	Melanoma-associated antigen 4 OS=Homo sapiens GN=MAGEA4 PE=1 SV=2	595.358	660.004	805.338	475.555	499.223	529.604	686.9	501.461	0.0882697	0.453963	1.05419
Q9Y6C9	Mitochondrial carrier homolog 2 OS=Homo sapiens GN=MTCH2 PE=1 SV=1	603.249	740.971	632.09	527.45	520.174	544.077	658.77	530.567	0.0885026	0.31224	1.05304
Q96LT7	Protein C9orf72 OS=Homo sapiens GN=C9orf72 PE=1 SV=2	460.301	634.591	355.827	653.953	849.621	656.417	483.573	719.997	0.0886877	-0.574257	1.05214
P00918	Carbonic anhydrase 2 OS=Homo sapiens GN=CA2 PE=1 SV=2	456.571	603.245	525.371	616.998	769.31	632.401	528.396	672.903	0.0891791	-0.34878	1.04974
Q96Q11	CCA tRNA nucleotidyltransferase 1, mitochondrial OS=Homo sapiens GN=TRNT1 PE=1 SV=2	592.684	632.692	686.342	518.587	599.765	551.104	637.24	556.486	0.0893165	0.195492	1.04907
P78540	Arginase-2, mitochondrial OS=Homo sapiens GN=ARG2 PE=1 SV=1	510.025	560.098	543.487	586.713	739.277	670.61	537.87	665.533	0.089342	-0.307253	1.04894
P38571	Lysosomal acid lipase/cholesteryl ester hydrolase OS=Homo sapiens GN=LIPA PE=1 SV=2	530.231	558.679	591.402	583.854	670.093	677.705	560.104	643.884	0.0896192	-0.201105	1.0476
Q5T0Z6	cAMP-dependent protein kinase inhibitor beta OS=Homo sapiens GN=PKIB PE=1 SV=1	622.105	672.342	822.959	442.824	372.213	632.605	705.802	482.547	0.0899861	0.548594	1.04582
B5MD23	Tetraspanin OS=Homo sapiens GN=TSPAN9 PE=1 SV=1	613.103	548.481	508.061	702.497	679.795	592.015	556.549	658.102	0.0900579	-0.241804	1.04548
Q6P2I3	Fumarylacetoacetate hydrolase domain-containing protein 2B OS=Homo sapiens GN=FAHD2B PE=1 SV=1	573.325	584.037	607.616	613.303	611.811	625.422	588.326	616.845	0.0901474	-0.0682932	1.04505
Q9UBK7	Rab-like protein 2A OS=Homo sapiens GN=RABL2A PE=1 SV=1	712.35	694.309	867.958	566.521	211.036	541.535	758.206	439.697	0.0908323	0.786078	1.04176
O00268	Transcription initiation factor TFIID subunit 4 OS=Homo sapiens GN=TAF4 PE=1 SV=2	727.121	599.587	637.773	592.318	518.022	540.596	654.827	550.312	0.0909242	0.250864	1.04132
O95183	Vesicle-associated membrane protein 5 OS=Homo sapiens GN=VAMP5 PE=1 SV=1	333.813	513.134	505.316	556.307	930.138	761.989	450.754	749.478	0.0910987	-0.733545	1.04049
Q99747	Gamma-soluble NSF attachment protein OS=Homo sapiens GN=NAPG PE=1 SV=1	679.788	620.349	701.32	559.895	441.501	601.724	667.152	534.373	0.0912631	0.320168	1.0397
Q9BZ67	FERM domain-containing protein 8 OS=Homo sapiens GN=FRMD8 PE=1 SV=1	528.745	583.245	596.521	594.332	644.672	662.179	569.504	633.728	0.0915227	-0.154158	1.03847
Q6NXT1	Ankyrin repeat domain-containing protein 54 OS=Homo sapiens GN=ANKRD54 PE=1 SV=2	601.953	520.276	590.551	675.829	642.782	610.359	570.926	642.99	0.0915934	-0.171492	1.03814
Q15369	Transcription elongation factor B polypeptide 1 OS=Homo sapiens GN=TCEB1 PE=1 SV=1	750.46	598.24	709.672	591.556	405.188	564.006	686.124	520.25	0.0916452	0.399265	1.03789
Q8IYB5	Stromal membrane-associated protein 1 OS=Homo sapiens GN=SMAP1 PE=1 SV=2	513.22	525.984	591.548	661.784	594.586	752.885	543.584	669.751	0.09215	-0.301122	1.0355
R4GMU1	GDH/6PGL endoplasmic bifunctional protein OS=Homo sapiens GN=H6PD PE=1 SV=1	560.044	583.672	557.039	611.343	687.077	613.948	566.918	637.456	0.0923082	-0.169185	1.03476
Q9Y6X5	Bis(5'-adenosyl)-triphosphatase ENPP4 OS=Homo sapiens GN=ENPP4 PE=1 SV=3	382.759	642.488	459.251	687.454	677.684	769.506	494.833	711.548	0.0923633	-0.52402	1.0345
O43298	Zinc finger and BTB domain-containing protein 43 OS=Homo sapiens GN=ZBTB43 PE=1 SV=1	476.433	520.464	606.142	664.841	597.713	774.273	534.346	678.942	0.0925002	-0.345514	1.03386
P27635	60S ribosomal protein L10 OS=Homo sapiens GN=RPL10 PE=1 SV=4	611.902	607.869	688.321	528.631	556.233	599.568	636.031	561.478	0.0926045	0.179867	1.03337
Q9Y448	Small kinetochore-associated protein OS=Homo sapiens GN=KNSTRN PE=1 SV=2	658.568	586.876	681.08	575.316	546.186	560.386	642.175	560.629	0.0927058	0.195919	1.03289
Q9UEW8	STE20/SPS1-related proline-alanine-rich protein kinase OS=Homo sapiens GN=STK39 PE=1 SV=3	590.903	692.74	705.039	514.958	455.223	617.291	662.894	529.157	0.0927166	0.325082	1.03284
A6ZKI3	Protein FAM127A OS=Homo sapiens GN=FAM127A PE=1 SV=1	405.348	604.36	545.313	620.341	661.761	773.169	518.34	685.09	0.0933384	-0.402395	1.02994
Q2T9J0	Peroxisomal leader peptide-processing protease OS=Homo sapiens GN=TYSND1 PE=1 SV=3	496.322	537.658	609.662	597.854	723.948	647.862	547.881	656.555	0.0933666	-0.261054	1.02981
Q9H8M9	Protein eva-1 homolog A OS=Homo sapiens GN=EVA1A PE=1 SV=1	464.765	525.919	560.026	578.669	792.083	689.09	516.903	686.614	0.0934677	-0.409606	1.02934
J3KR58	Selenide, water dikinase 2 OS=Homo sapiens GN=SEPHS2 PE=1 SV=1	812.914	613.931	678.489	623.101	392.669	504.749	701.778	506.84	0.0938716	0.469484	1.02747
Q6PCD5	E3 ubiquitin-protein ligase RFWD3 OS=Homo sapiens GN=RFWD3 PE=1 SV=3	532.871	498.227	556.408	622.498	786.158	631.064	529.169	679.907	0.0938844	-0.361609	1.02741
O75718	Cartilage-associated protein OS=Homo sapiens GN=CRTAP PE=1 SV=1	513.061	612.973	559.415	613.256	658.438	650.698	561.817	640.797	0.0939549	-0.189768	1.02708
Q5T0I0	Gelsolin (Fragment) OS=Homo sapiens GN=GSN PE=1 SV=1	613.988	501.8	562.324	657.739	663.127	644.59	559.371	655.152	0.0940632	-0.228025	1.02658
Q8NG06	E3 ubiquitin-protein ligase TRIM58 OS=Homo sapiens GN=TRIM58 PE=2 SV=2	567.729	733.488	683.396	490.698	533.022	548.839	661.537	524.186	0.0944292	0.335744	1.02489
O15126	Secretory carrier-associated membrane protein 1 OS=Homo sapiens GN=SCAMP1 PE=1 SV=2	587.4	528.413	477.132	700.449	770.983	578.798	530.982	683.41	0.0946446	-0.364089	1.0239
P06733	Alpha-enolase OS=Homo sapiens GN=ENO1 PE=1 SV=2	601.718	572.368	587.961	622.545	637.453	597.988	587.349	619.329	0.0947517	-0.0764873	1.02341
Q96GK7	Fumarylacetoacetate hydrolase domain-containing protein 2A OS=Homo sapiens GN=FAHD2A PE=1 SV=1	565.852	590.909	603.977	605.882	618.481	627.035	586.912	617.132	0.0957173	-0.0724349	1.01901
Q8ND56	Protein LSM14 homolog A OS=Homo sapiens GN=LSM14A PE=1 SV=3	592.249	629.665	676.233	530.837	558.507	600.754	632.716	563.366	0.0958739	0.167484	1.0183
Q6ZWT7	Lysophospholipid acyltransferase 2 OS=Homo sapiens GN=MBOAT2 PE=2 SV=2	597.535	661.177	889.276	454.825	371.382	590.112	715.996	472.106	0.0958824	0.600839	1.01826
O95453	Poly(A)-specific ribonuclease PARN OS=Homo sapiens GN=PARN PE=1 SV=1	576.751	749.163	666.54	504.822	514.456	547.345	664.152	522.208	0.0959188	0.346889	1.0181
G3V5Z7	Proteasome subunit alpha type OS=Homo sapiens GN=PSMA6 PE=1 SV=1	584.651	645.429	704.97	536.223	574.333	536.254	645.017	548.937	0.0960338	0.232697	1.01758
Q9BT67	NEDD4 family-interacting protein 1 OS=Homo sapiens GN=NDFIP1 PE=1 SV=1	480.821	562.804	468.499	577.455	823.46	693.666	504.041	698.193	0.0962325	-0.470085	1.01668
Q9H267	Vacuolar protein sorting-associated protein 33B OS=Homo sapiens GN=VPS33B PE=1 SV=2	548.734	522.612	608.027	602.524	634.42	709.478	559.791	648.807	0.096471	-0.212902	1.0156
Q9NP87	DNA-directed DNA/RNA polymerase mu OS=Homo sapiens GN=POLM PE=1 SV=1	446.42	579.91	565.659	574.994	730.545	703.656	530.663	669.732	0.0965416	-0.335789	1.01529
Q9Y316	Protein MEMO1 OS=Homo sapiens GN=MEMO1 PE=1 SV=1	543.845	508.683	543.336	575.987	715.15	735.826	531.955	675.654	0.096548	-0.344981	1.01526
Q643R3	Lysophospholipid acyltransferase LPCAT4 OS=Homo sapiens GN=LPCAT4 PE=1 SV=1	533.376	617.633	535.603	596.302	657.401	665.557	562.204	639.753	0.0966764	-0.186422	1.01468
P30101	Protein disulfide-isomerase A3 OS=Homo sapiens GN=PDIA3 PE=1 SV=4	631.399	592.679	639.585	579.793	572.685	592.518	621.221	581.665	0.0966981	0.0949174	1.01458
Q8IYB7	DIS3-like exonuclease 2 OS=Homo sapiens GN=DIS3L2 PE=1 SV=4	611.067	624.022	741.771	505.735	489.906	612.838	658.954	536.16	0.0968143	0.297514	1.01406
Q92539	Phosphatidate phosphatase LPIN2 OS=Homo sapiens GN=LPIN2 PE=1 SV=1	576.77	691.571	664.674	557.685	522.623	568.823	644.338	549.71	0.0970169	0.229147	1.01315
Q9NXW9	Alpha-ketoglutarate-dependent dioxygenase alkB homolog 4 OS=Homo sapiens GN=ALKBH4 PE=1 SV=1	645.032	605.585	660.495	500.921	592.591	583.138	637.037	558.883	0.0970434	0.188831	1.01303
Q86Y82	Syntaxin-12 OS=Homo sapiens GN=STX12 PE=1 SV=1	676.742	591.18	693.771	576.575	478.903	595.045	653.898	550.175	0.0979754	0.249176	1.00888
Q9BUB4	tRNA-specific adenosine deaminase 1 OS=Homo sapiens GN=ADAT1 PE=1 SV=1	544.767	614.503	520.904	590.628	668.081	667.183	560.058	641.964	0.0982177	-0.196916	1.00781
Q9Y3B9	RRP15-like protein OS=Homo sapiens GN=RRP15 PE=1 SV=2	594.633	630.822	736.201	504.31	556.296	556.144	653.886	538.916	0.0983958	0.278977	1.00702
Q99828	Calcium and integrin-binding protein 1 OS=Homo sapiens GN=CIB1 PE=1 SV=4	862.635	572.946	692.376	394.12	587.485	467.293	709.319	482.966	0.0986419	0.554512	1.00594
O43156	TELO2-interacting protein 1 homolog OS=Homo sapiens GN=TTI1 PE=1 SV=3	589.326	672.764	727	518.392	455.623	616.608	663.03	530.207	0.0990621	0.322517	1.00409
Q8WWV3	Reticulon-4-interacting protein 1, mitochondrial OS=Homo sapiens GN=RTN4IP1 PE=1 SV=2	641.183	488.696	513.185	728.216	665.857	626.944	547.688	673.673	0.0995173	-0.298693	1.0021
O95394	Phosphoacetylglucosamine mutase OS=Homo sapiens GN=PGM3 PE=1 SV=1	624.507	647.021	718.697	567.787	441.128	598.336	663.408	535.75	0.0998929	0.308336	1.00047
Q8NFW1	Collagen alpha-1(XXII) chain OS=Homo sapiens GN=COL22A1 PE=2 SV=2	695.61	632.088	611.22	604.526	570.663	493.369	646.306	556.186	0.100297	0.216651	0.998712
P60604	Ubiquitin-conjugating enzyme E2 G2 OS=Homo sapiens GN=UBE2G2 PE=1 SV=1	584.686	701.155	647.421	512.394	610.195	510.121	644.421	544.237	0.100695	0.243768	0.996993
Q8IYS1	Peptidase M20 domain-containing protein 2 OS=Homo sapiens GN=PM20D2 PE=1 SV=2	614.889	642.351	625.548	547.724	612.314	545.78	627.596	568.606	0.100837	0.142406	0.996382
Q5W0V3	Protein FAM160B1 OS=Homo sapiens GN=FAM160B1 PE=1 SV=1	564.183	437.265	553.358	707.593	816.275	577.362	518.269	700.41	0.101144	-0.434499	0.995061
Q15061	WD repeat-containing protein 43 OS=Homo sapiens GN=WDR43 PE=1 SV=3	638.44	630.927	724.08	596.307	442.541	574.041	664.482	537.63	0.10124	0.305618	0.994649
K7EMT4	Uncharacterized protein (Fragment) OS=Homo sapiens PE=4 SV=1	563.175	519.349	477.799	777.951	567.898	769.265	520.108	705.038	0.101367	-0.438891	0.994103
U3KQB3	Casein kinase I isoform gamma-1 OS=Homo sapiens GN=CSNK1G1 PE=3 SV=1	572.632	612.051	553.441	636.939	618.459	623.604	579.375	626.334	0.101379	-0.112436	0.994053
O75157	TSC22 domain family protein 2 OS=Homo sapiens GN=TSC22D2 PE=1 SV=3	816.841	601.977	662.776	620.225	486.098	434.183	693.865	513.502	0.10144	0.434284	0.99379
Q9BTE1	Dynactin subunit 5 OS=Homo sapiens GN=DCTN5 PE=1 SV=1	694.678	576.149	680.668	495.373	601.58	543.735	650.498	546.896	0.101542	0.25028	0.993352
Q86YQ8	Copine-8 OS=Homo sapiens GN=CPNE8 PE=1 SV=2	525.659	560.441	599.612	586.282	651.783	688.937	561.904	642.334	0.101663	-0.193	0.992836
Q9Y2E5	Epididymis-specific alpha-mannosidase OS=Homo sapiens GN=MAN2B2 PE=1 SV=4	443.128	495.276	558.48	569.666	839.299	706.302	498.961	705.089	0.102128	-0.498877	0.990854
H0Y9Z5	CCR4-NOT transcription complex subunit 6-like (Fragment) OS=Homo sapiens GN=CNOT6L PE=1 SV=1	568.48	579.069	550.812	595.475	686.425	631.656	566.12	637.852	0.10237	-0.172113	0.989828
Q96QC0	Serine/threonine-protein phosphatase 1 regulatory subunit 10 OS=Homo sapiens GN=PPP1R10 PE=1 SV=1	580.228	772.984	651.837	460.831	607.292	465.917	668.35	511.347	0.102684	0.386301	0.988497
Q86U86	Protein polybromo-1 OS=Homo sapiens GN=PBRM1 PE=1 SV=1	659.134	614.175	628.83	617.034	535.465	560.19	634.046	570.896	0.102735	0.15136	0.988284
Q8WZ82	Ovarian cancer-associated gene 2 protein OS=Homo sapiens GN=OVCA2 PE=1 SV=1	437.369	661.045	407.142	768.934	620.571	744.579	501.852	711.361	0.102755	-0.503319	0.988197
Q9H4L5	Oxysterol-binding protein-related protein 3 OS=Homo sapiens GN=OSBPL3 PE=1 SV=1	588.945	544.962	607.015	630.77	606.369	650.715	580.307	629.284	0.102781	-0.116895	0.988087
P34913	Bifunctional epoxide hydrolase 2 OS=Homo sapiens GN=EPHX2 PE=1 SV=2	445.091	610.283	545.324	620.475	748.769	632.777	533.566	667.34	0.103031	-0.322755	0.98703
Q52LA3	Protein lin-52 homolog OS=Homo sapiens GN=LIN52 PE=1 SV=1	680.489	390.675	396.155	673.498	695.775	848.029	489.106	739.101	0.103119	-0.595623	0.986662
Q8WWX9	Selenoprotein M OS=Homo sapiens GN=SELM PE=1 SV=3	555.435	549.189	509.248	572.993	727.747	699.993	537.957	666.911	0.103232	-0.310003	0.986187
Q92636	Protein FAN OS=Homo sapiens GN=NSMAF PE=1 SV=2	498.389	591.914	593.281	619.416	631.449	678.709	561.195	643.191	0.103256	-0.196746	0.986084
O15541	RING finger protein 113A OS=Homo sapiens GN=RNF113A PE=1 SV=1	770.184	600.586	638.846	577.643	512.356	513.878	669.872	534.626	0.10361	0.325356	0.984597
G3V1V4	Family with sequence similarity 112, member B, isoform CRA_b OS=Homo sapiens GN=GTSF1 PE=1 SV=1	504.272	889.386	855.733	367.386	284.674	600.404	749.797	417.488	0.103611	0.844765	0.984592
P25686	DnaJ homolog subfamily B member 2 OS=Homo sapiens GN=DNAJB2 PE=1 SV=3	666.178	619.17	731.114	587.655	422.412	582.443	672.154	530.837	0.104025	0.340524	0.982863
O00255	Menin OS=Homo sapiens GN=MEN1 PE=1 SV=4	511.264	529.946	518.712	764.718	754.789	572.162	519.974	697.223	0.104284	-0.423181	0.981782
Q92870	Amyloid beta A4 precursor protein-binding family B member 2 OS=Homo sapiens GN=APBB2 PE=1 SV=3	605.542	508.47	527.76	761.89	666.588	593.677	547.257	674.051	0.104444	-0.30064	0.981116
P05121	Plasminogen activator inhibitor 1 OS=Homo sapiens GN=SERPINE1 PE=1 SV=1	448.603	642.34	428.928	598.184	789.761	689.256	506.624	692.4	0.104533	-0.450691	0.980748
Q13200	26S proteasome non-ATPase regulatory subunit 2 OS=Homo sapiens GN=PSMD2 PE=1 SV=3	623.412	605.706	661.62	587.771	530.272	599.746	630.246	572.596	0.104637	0.138397	0.980315
Q9UHV9	Prefoldin subunit 2 OS=Homo sapiens GN=PFDN2 PE=1 SV=1	648.346	628.36	591.769	592.464	575.384	570.168	622.825	579.338	0.104715	0.10442	0.979993
Q8WYB5	Histone acetyltransferase KAT6B OS=Homo sapiens GN=KAT6B PE=1 SV=3	542.865	348.551	611.868	893.116	609.127	717.668	501.095	739.97	0.104955	-0.562384	0.978995
Q8WXX7	Autism susceptibility gene 2 protein OS=Homo sapiens GN=AUTS2 PE=1 SV=1	547.37	567.18	593.84	686.219	590.025	650.965	569.463	642.403	0.104991	-0.173877	0.978848
Q08357	Sodium-dependent phosphate transporter 2 OS=Homo sapiens GN=SLC20A2 PE=1 SV=1	587.02	669.57	726.506	556.615	449.28	599.165	661.032	535.02	0.105237	0.305128	0.977832
Q8WWQ0	PH-interacting protein OS=Homo sapiens GN=PHIP PE=1 SV=2	635.299	590.591	646.958	591.946	558.766	588.449	624.283	579.72	0.105361	0.106843	0.977319
Q96KP4	Cytosolic non-specific dipeptidase OS=Homo sapiens GN=CNDP2 PE=1 SV=2	576.343	570.791	596.114	590.93	636.54	642.743	581.082	623.405	0.105608	-0.101426	0.976304
A0A0G2JL52	Valine--tRNA ligase, mitochondrial OS=Homo sapiens GN=VARS2 PE=1 SV=1	552.194	561.332	577.098	590.672	689.376	641.935	563.541	640.661	0.105795	-0.18504	0.975535
Q5EBL8	PDZ domain-containing protein 11 OS=Homo sapiens GN=PDZD11 PE=1 SV=2	603.292	545.161	569.198	599.264	678.633	624.822	572.551	634.24	0.106022	-0.147625	0.974603
P60953	Cell division control protein 42 homolog OS=Homo sapiens GN=CDC42 PE=1 SV=2	717.95	558.633	868.21	481.282	385.444	584.585	714.931	483.77	0.106972	0.563482	0.97073
Q9UID3	Vacuolar protein sorting-associated protein 51 homolog OS=Homo sapiens GN=VPS51 PE=1 SV=2	521.264	590.263	600.34	622.928	617.943	662.348	570.623	634.406	0.107029	-0.15287	0.9705
Q9NTJ5	Phosphatidylinositide phosphatase SAC1 OS=Homo sapiens GN=SACM1L PE=1 SV=2	473.283	596.479	549.601	574.393	725.35	680.183	539.788	659.975	0.107443	-0.290021	0.968823
P51114	Fragile X mental retardation syndrome-related protein 1 OS=Homo sapiens GN=FXR1 PE=1 SV=3	703.656	626.538	607.765	617.177	516.685	544.009	645.986	559.29	0.10774	0.207906	0.967625
Q96JQ2	Calmin OS=Homo sapiens GN=CLMN PE=1 SV=1	490.478	401.886	401.552	678.614	644.806	1066.03	431.305	796.485	0.107851	-0.884937	0.967175
P57740	Nuclear pore complex protein Nup107 OS=Homo sapiens GN=NUP107 PE=1 SV=1	524.673	603.366	583.516	599.774	646.959	648.461	570.518	631.731	0.107931	-0.147037	0.966853
O43396	Thioredoxin-like protein 1 OS=Homo sapiens GN=TXNL1 PE=1 SV=3	577.478	522.472	604.461	657.825	591.273	686.877	568.137	645.325	0.108271	-0.183788	0.965487
Q14344	Guanine nucleotide-binding protein subunit alpha-13 OS=Homo sapiens GN=GNA13 PE=1 SV=2	568.271	594.843	569.62	605.863	663.708	608.118	577.578	625.896	0.109025	-0.115908	0.962474
Q9NW15	Anoctamin-10 OS=Homo sapiens GN=ANO10 PE=1 SV=2	622.041	643.698	681.671	581.646	474.847	597.228	649.136	551.24	0.109883	0.23584	0.959068
Q6IE81	Protein Jade-1 OS=Homo sapiens GN=JADE1 PE=1 SV=1	591.135	570.602	580.66	612.243	658.727	603.879	580.799	624.949	0.110168	-0.105701	0.957946
P05187	Alkaline phosphatase, placental type OS=Homo sapiens GN=ALPP PE=1 SV=2	546.522	591.491	547.128	586.202	693.908	641.325	561.714	640.478	0.110429	-0.189315	0.956918
P36543	V-type proton ATPase subunit E 1 OS=Homo sapiens GN=ATP6V1E1 PE=1 SV=1	700.868	640.453	583.35	524.255	577.465	565.79	641.557	555.837	0.111067	0.206917	0.954414
Q70J99	Protein unc-13 homolog D OS=Homo sapiens GN=UNC13D PE=1 SV=1	541.374	539.597	543.322	646.215	754.974	600.062	541.431	667.083	0.111554	-0.30109	0.952515
Q15043	Zinc transporter ZIP14 OS=Homo sapiens GN=SLC39A14 PE=1 SV=3	711.841	606.627	612.519	535.095	578.076	555.865	643.662	556.345	0.111887	0.210323	0.951219
Q15118	[Pyruvate dehydrogenase (acetyl-transferring)] kinase isozyme 1, mitochondrial OS=Homo sapiens GN=PDK1 PE=1 SV=1	573.264	588.974	514.237	713.251	662.774	584.085	558.825	653.37	0.112444	-0.225505	0.949065
P48443	Retinoic acid receptor RXR-gamma OS=Homo sapiens GN=RXRG PE=1 SV=1	573.482	565.301	552.125	591.094	641.563	694.296	563.636	642.318	0.112847	-0.188523	0.947511
A0A0A0MTN0	Cullin-2 OS=Homo sapiens GN=CUL2 PE=1 SV=1	475.959	585.87	595.523	679.716	589.328	702.298	552.451	657.114	0.113156	-0.250298	0.946324
O95359	Transforming acidic coiled-coil-containing protein 2 OS=Homo sapiens GN=TACC2 PE=1 SV=3	537.638	736.2	758.159	433.887	582.039	487.59	677.332	501.172	0.113158	0.434558	0.946313
Q13190	Syntaxin-5 OS=Homo sapiens GN=STX5 PE=1 SV=2	565.865	551.879	544.013	621.128	727.126	610.455	553.919	652.903	0.113232	-0.237194	0.946031
Q0VDF9	Heat shock 70 kDa protein 14 OS=Homo sapiens GN=HSPA14 PE=1 SV=1	613.435	573.862	552.053	647.356	644.007	596.177	579.784	629.18	0.113545	-0.117958	0.944834
Q9H0K6	Pseudouridylate synthase 7 homolog-like protein OS=Homo sapiens GN=PUS7L PE=1 SV=1	574.859	597.149	578.81	629.438	593.025	645.973	583.606	622.812	0.113651	-0.0938023	0.944425
Q17RW2	Collagen alpha-1(XXIV) chain OS=Homo sapiens GN=COL24A1 PE=1 SV=2	414.191	642.104	464.588	586.651	786.734	697.513	506.961	690.299	0.1139	-0.445347	0.943476
Q8IYB8	ATP-dependent RNA helicase SUPV3L1, mitochondrial OS=Homo sapiens GN=SUPV3L1 PE=1 SV=1	622.321	623.259	709.933	556.441	473.212	613.934	651.838	547.862	0.114192	0.250699	0.942366
Q9BT88	Synaptotagmin-11 OS=Homo sapiens GN=SYT11 PE=1 SV=2	447.724	548.093	481.905	571.975	865.427	689.105	492.574	708.836	0.114579	-0.52511	0.940896
M0R2A8	Dipeptidyl peptidase 9 OS=Homo sapiens GN=DPP9 PE=1 SV=1	689.063	641.6	685.896	595.749	421.404	575.548	672.186	530.9	0.115275	0.34042	0.938266
Q99426	Tubulin-folding cofactor B OS=Homo sapiens GN=TBCB PE=1 SV=2	764.858	605.511	626.785	566.274	468.662	582.418	665.718	539.118	0.115288	0.30431	0.938214
Q96LD8	Sentrin-specific protease 8 OS=Homo sapiens GN=SENP8 PE=1 SV=1	607.332	724.491	829.388	502.391	281.207	625.517	720.404	469.705	0.116081	0.61705	0.93524
Q9NZQ7	Programmed cell death 1 ligand 1 OS=Homo sapiens GN=CD274 PE=1 SV=1	719.481	580.245	761.756	357.26	547.278	597.433	687.161	500.657	0.116422	0.456826	0.933966
O75787	Renin receptor OS=Homo sapiens GN=ATP6AP2 PE=1 SV=2	554.14	607.426	459.71	654.057	749.481	593.485	540.425	665.675	0.116466	-0.300722	0.9338
Q11201	CMP-N-acetylneuraminate-beta-galactosamide-alpha-2,3-sialyltransferase 1 OS=Homo sapiens GN=ST3GAL1 PE=2 SV=1	733.757	597.208	650.106	585.239	462.562	589.268	660.357	545.69	0.117139	0.275165	0.931297
Q9UM22	Mammalian ependymin-related protein 1 OS=Homo sapiens GN=EPDR1 PE=1 SV=2	553.973	583.155	448.796	602.927	791.221	631.933	528.641	675.361	0.117242	-0.353368	0.930915
P56556	NADH dehydrogenase [ubiquinone] 1 alpha subcomplex subunit 6 OS=Homo sapiens GN=NDUFA6 PE=1 SV=3	450.774	623.021	551.72	672.594	619.109	702.086	541.838	664.596	0.117385	-0.294616	0.930387
P60468	Protein transport protein Sec61 subunit beta OS=Homo sapiens GN=SEC61B PE=1 SV=2	730.016	734.37	737.488	567.547	258.177	563.831	733.958	463.185	0.118339	0.664109	0.926874
P26374	Rab proteins geranylgeranyltransferase component A 2 OS=Homo sapiens GN=CHML PE=1 SV=2	649.159	601.345	619.853	613.137	565.714	566.091	623.452	581.647	0.118617	0.100135	0.925854
A0A024R644	Ceroid-lipofuscinosis neuronal protein 5 OS=Homo sapiens GN=CLN5 PE=1 SV=1	361.771	541.002	498.862	624.656	635.981	968.838	467.212	743.158	0.118658	-0.669594	0.925702
Q8WWI1	LIM domain only protein 7 OS=Homo sapiens GN=LMO7 PE=1 SV=3	771.674	575.308	682.93	618.798	477.816	499.908	676.637	532.174	0.118677	0.346485	0.925635
P21359	Neurofibromin OS=Homo sapiens GN=NF1 PE=1 SV=2	585.474	635.276	655.95	554.058	557.169	604.971	625.567	572.066	0.118742	0.128982	0.925396
Q9P2D3	HEAT repeat-containing protein 5B OS=Homo sapiens GN=HEATR5B PE=1 SV=2	564.912	677.252	707.878	549.383	503.775	578.61	650.014	543.923	0.118759	0.257069	0.925333
Q9Y3B8	Oligoribonuclease, mitochondrial OS=Homo sapiens GN=REXO2 PE=1 SV=3	628.137	680.644	607.429	541.684	619.115	502.536	638.736	554.445	0.118912	0.204177	0.924774
Q5R3I4	Tetratricopeptide repeat protein 38 OS=Homo sapiens GN=TTC38 PE=1 SV=1	734.042	622.201	673.13	614.482	413.895	561.978	676.457	530.118	0.119172	0.351685	0.923825
Q8TDI0	Chromodomain-helicase-DNA-binding protein 5 OS=Homo sapiens GN=CHD5 PE=1 SV=1	659.961	675.465	601.196	625.488	540.223	501.433	645.541	555.715	0.119183	0.216162	0.923787
O14964	Hepatocyte growth factor-regulated tyrosine kinase substrate OS=Homo sapiens GN=HGS PE=1 SV=1	681.838	627.921	641.91	569.504	474.849	610.723	650.556	551.692	0.119258	0.237811	0.923511
P49023	Paxillin OS=Homo sapiens GN=PXN PE=1 SV=3	705.801	605.92	653.861	618.004	559.321	470.949	655.194	549.425	0.119271	0.254001	0.923466
Q9NPA8	Transcription and mRNA export factor ENY2 OS=Homo sapiens GN=ENY2 PE=1 SV=1	669.794	671.356	856.737	508.904	251.46	627.061	732.629	462.475	0.119408	0.663707	0.922968
B8ZZA8	Glutaminase kidney isoform, mitochondrial OS=Homo sapiens GN=GLS PE=1 SV=1	603.517	551.543	595.005	607.249	646.047	617.51	583.355	623.602	0.119413	-0.0962513	0.922948
Q96DR7	Rho guanine nucleotide exchange factor 26 OS=Homo sapiens GN=ARHGEF26 PE=1 SV=4	539.662	580.755	600.98	586.746	650.371	649.718	573.799	628.945	0.119627	-0.132389	0.92217
Q5T8D3	Acyl-CoA-binding domain-containing protein 5 OS=Homo sapiens GN=ACBD5 PE=1 SV=1	569.993	692.201	671.758	479.444	602.766	544.13	644.651	542.113	0.119791	0.249924	0.921574
P02786	Transferrin receptor protein 1 OS=Homo sapiens GN=TFRC PE=1 SV=2	578.837	611.569	557.009	620.679	640.742	603.409	582.471	621.61	0.120226	-0.0938223	0.920002
Q4G0N4	NAD kinase 2, mitochondrial OS=Homo sapiens GN=NADK2 PE=1 SV=2	502.26	588.251	586.433	584.722	650.715	694.212	558.981	643.217	0.120309	-0.202504	0.919702
P48382	DNA-binding protein RFX5 OS=Homo sapiens GN=RFX5 PE=1 SV=1	406.395	609.64	525.277	614.671	813.493	628.167	513.77	685.444	0.120595	-0.415914	0.918669
Q6NYC1	Bifunctional arginine demethylase and lysyl-hydroxylase JMJD6 OS=Homo sapiens GN=JMJD6 PE=1 SV=1	574.583	660.761	710.816	500.147	514.93	614.26	648.72	543.113	0.120599	0.256344	0.918656
Q8N5L8	Ribonuclease P protein subunit p25-like protein OS=Homo sapiens GN=RPP25L PE=1 SV=1	652.29	599.62	617.791	565.617	611.577	556.479	623.234	577.891	0.120715	0.108976	0.91824
P53778	Mitogen-activated protein kinase 12 OS=Homo sapiens GN=MAPK12 PE=1 SV=3	575.995	533.69	554.157	573.653	685.275	695.724	554.614	651.551	0.120806	-0.232393	0.917911
Q8IZQ5	Selenoprotein H OS=Homo sapiens GN=SELH PE=1 SV=2	644.193	598.909	643.252	602.725	533.895	591.498	628.785	576.039	0.120872	0.126399	0.917675
Q9BSJ2	Gamma-tubulin complex component 2 OS=Homo sapiens GN=TUBGCP2 PE=1 SV=2	570.809	604.478	577.583	599.781	611.457	646.414	584.29	619.217	0.121131	-0.083761	0.916744
A0A0A0MRX1	ELAV-like protein OS=Homo sapiens GN=ELAVL2 PE=1 SV=1	659.874	648.615	590.562	611.053	569.27	526.589	633.017	568.971	0.121138	0.153889	0.916719
Q8ND90	Paraneoplastic antigen Ma1 OS=Homo sapiens GN=PNMA1 PE=1 SV=2	510.549	563.943	528.721	560.527	722.774	720.352	534.404	667.884	0.121346	-0.321666	0.915975
Q8NG27	E3 ubiquitin-protein ligase Praja-1 OS=Homo sapiens GN=PJA1 PE=1 SV=2	815.529	620.441	830.344	582.513	199.23	571.774	755.438	451.172	0.121407	0.743635	0.915756
Q7L2J0	7SK snRNA methylphosphate capping enzyme OS=Homo sapiens GN=MEPCE PE=1 SV=1	549.428	692.482	812.905	452.846	492.606	552.019	684.939	499.157	0.121809	0.456481	0.914322
P63172	Dynein light chain Tctex-type 1 OS=Homo sapiens GN=DYNLT1 PE=1 SV=1	466.517	544.13	626.641	623.398	629.171	732.339	545.763	661.636	0.122224	-0.277764	0.912843
F8VU11	PRP40 pre-mRNA processing factor 40 homolog B (Yeast), isoform CRA_a OS=Homo sapiens GN=PRPF40B PE=1 SV=2	605.605	651.951	701.074	447.762	544.846	615.429	652.876	536.012	0.12282	0.284544	0.910732
Q76FK4	Nucleolar protein 8 OS=Homo sapiens GN=NOL8 PE=1 SV=1	699.345	750.883	752.702	651.431	284.073	461.101	734.31	465.535	0.123194	0.6575	0.909412
P04843	Dolichyl-diphosphooligosaccharide--protein glycosyltransferase subunit 1 OS=Homo sapiens GN=RPN1 PE=1 SV=1	699.324	588.946	656.02	605.767	494.786	575.531	648.097	558.694	0.124741	0.214151	0.90399
Q8WUA2	Peptidyl-prolyl cis-trans isomerase-like 4 OS=Homo sapiens GN=PPIL4 PE=1 SV=1	586.497	640.838	703.076	492.773	540.462	613.981	643.47	549.072	0.125076	0.228878	0.902825
Q9H1I8	Activating signal cointegrator 1 complex subunit 2 OS=Homo sapiens GN=ASCC2 PE=1 SV=3	496.144	608.707	575.344	601.582	680.819	640.743	560.065	641.048	0.125089	-0.194837	0.90278
Q13077	TNF receptor-associated factor 1 OS=Homo sapiens GN=TRAF1 PE=1 SV=1	511.409	579.521	531.323	570.782	743.943	666.268	540.751	660.331	0.125934	-0.288225	0.899857
Q92747	Actin-related protein 2/3 complex subunit 1A OS=Homo sapiens GN=ARPC1A PE=1 SV=2	548.007	728.069	699.099	448.161	557.328	566.294	658.392	523.928	0.126705	0.329578	0.897207
Q14790	Caspase-8 OS=Homo sapiens GN=CASP8 PE=1 SV=1	454.401	608.072	556.657	575.372	713.93	688.323	539.71	659.208	0.126714	-0.28855	0.897175
Q96CW5	Gamma-tubulin complex component 3 OS=Homo sapiens GN=TUBGCP3 PE=1 SV=2	491.619	614.893	572.475	651.733	603.048	683.82	559.662	646.2	0.126749	-0.207425	0.897055
Q5T6V5	UPF0553 protein C9orf64 OS=Homo sapiens GN=C9orf64 PE=1 SV=1	561.791	737.472	677.211	545.27	515.311	531.227	658.824	530.603	0.126965	0.312262	0.896315
P43355	Melanoma-associated antigen 1 OS=Homo sapiens GN=MAGEA1 PE=1 SV=1	583.826	643.015	649.956	533.695	605.189	568.227	625.599	569.037	0.127052	0.136716	0.896019
O14545	TRAF-type zinc finger domain-containing protein 1 OS=Homo sapiens GN=TRAFD1 PE=1 SV=1	812.444	636.301	825.1	685.965	239.926	432.958	757.949	452.95	0.127127	0.742748	0.895761
Q9Y6G9	Cytoplasmic dynein 1 light intermediate chain 1 OS=Homo sapiens GN=DYNC1LI1 PE=1 SV=3	690.051	614.902	598.563	582.497	585.704	535.416	634.506	567.872	0.127233	0.160067	0.8954
O15439	Multidrug resistance-associated protein 4 OS=Homo sapiens GN=ABCC4 PE=1 SV=3	618.663	559.069	556.467	677.432	612.735	613.876	578.066	634.681	0.127481	-0.134796	0.894556
Q02447	Transcription factor Sp3 OS=Homo sapiens GN=SP3 PE=1 SV=3	501.335	777.888	861.741	372.78	441.307	561.322	713.655	458.47	0.128826	0.6384	0.889996
Q14119	Vascular endothelial zinc finger 1 OS=Homo sapiens GN=VEZF1 PE=1 SV=2	770.886	727.993	575.748	611.793	546.384	359.348	691.542	505.842	0.129441	0.451131	0.887928
Q86X29	Lipolysis-stimulated lipoprotein receptor OS=Homo sapiens GN=LSR PE=1 SV=4	605.92	588.022	533.004	653.384	591.16	658.746	575.649	634.43	0.129455	-0.140272	0.887882
Q8N8R7	ARL14 effector protein OS=Homo sapiens GN=ARL14EP PE=1 SV=1	400.998	658.333	465.532	662.304	736.926	681.705	508.287	693.645	0.129602	-0.448553	0.887389
Q8TER5	Rho guanine nucleotide exchange factor 40 OS=Homo sapiens GN=ARHGEF40 PE=1 SV=3	669.262	580.955	691.947	556.905	495.777	614.783	647.388	555.822	0.130509	0.220009	0.884359
Q5XPI4	E3 ubiquitin-protein ligase RNF123 OS=Homo sapiens GN=RNF123 PE=1 SV=1	573.987	653.184	722.699	598.436	501.327	546.25	649.957	548.671	0.130987	0.244403	0.882773
Q9BQ13	BTB/POZ domain-containing protein KCTD14 OS=Homo sapiens GN=KCTD14 PE=1 SV=2	573.339	514.395	493.893	550.745	730.312	757.288	527.209	679.448	0.131158	-0.365989	0.882205
Q06190	Serine/threonine-protein phosphatase 2A regulatory subunit B'' subunit alpha OS=Homo sapiens GN=PPP2R3A PE=1 SV=1	531.668	463.874	497.032	672.599	890.19	585.937	497.525	716.242	0.13122	-0.525679	0.881999
Q86SJ2	Amphoterin-induced protein 2 OS=Homo sapiens GN=AMIGO2 PE=1 SV=1	583.413	825.905	898.791	374.175	154.391	689.606	769.37	406.057	0.131334	0.921994	0.881621
A0A087WW40	Endophilin-B1 OS=Homo sapiens GN=SH3GLB1 PE=1 SV=1	619.974	515.966	579.334	686.804	611.119	635.325	571.758	644.416	0.131661	-0.172589	0.880543
H3BLT4	Baculoviral IAP repeat-containing protein 5 OS=Homo sapiens GN=BIRC5 PE=1 SV=1	518.913	439.498	383.784	878.234	963.317	505.063	447.398	782.205	0.131905	-0.805986	0.879737
Q16619	Cardiotrophin-1 OS=Homo sapiens GN=CTF1 PE=1 SV=1	491.09	615.503	532.296	622.015	742.441	600.729	546.296	655.062	0.133043	-0.261948	0.876009
Q9P1F3	Costars family protein ABRACL OS=Homo sapiens GN=ABRACL PE=1 SV=1	632.078	523.559	485.346	765.161	583.358	681.855	546.994	676.791	0.13324	-0.307185	0.875365
Q1ED39	Lysine-rich nucleolar protein 1 OS=Homo sapiens GN=KNOP1 PE=1 SV=1	674.933	654.714	592.068	619.885	509.062	560.392	640.571	563.113	0.133251	0.185935	0.875328
O15127	Secretory carrier-associated membrane protein 2 OS=Homo sapiens GN=SCAMP2 PE=1 SV=2	565.381	614.531	472.789	603.428	715.442	637.35	550.9	652.073	0.133285	-0.243243	0.87522
Q7L273	BTB/POZ domain-containing protein KCTD9 OS=Homo sapiens GN=KCTD9 PE=1 SV=1	548.337	698.269	743.7	451.813	613.15	491.468	663.435	518.81	0.134026	0.354748	0.872811
Q9HB09	Bcl-2-like protein 12 OS=Homo sapiens GN=BCL2L12 PE=1 SV=1	472.737	635.319	485.092	640.627	772.87	597.313	531.049	670.27	0.134209	-0.335896	0.872219
Q9HC98	Serine/threonine-protein kinase Nek6 OS=Homo sapiens GN=NEK6 PE=1 SV=2	592.968	601.415	537.85	620.893	661.055	600.67	577.411	627.539	0.13447	-0.120107	0.871374
Q8WUM0	Nuclear pore complex protein Nup133 OS=Homo sapiens GN=NUP133 PE=1 SV=2	572.657	617.266	548.384	639.9	616.601	622.191	579.436	626.231	0.134864	-0.112045	0.870104
Q96GC5	39S ribosomal protein L48, mitochondrial OS=Homo sapiens GN=MRPL48 PE=1 SV=2	644.214	595.726	625.112	612.512	573.914	563.884	621.684	583.437	0.135097	0.0916057	0.869355
H0Y886	NADH dehydrogenase [ubiquinone] 1 beta subcomplex subunit 5, mitochondrial (Fragment) OS=Homo sapiens GN=NDUFB5 PE=1 SV=1	547.435	780.882	674.47	443.51	508.876	584.194	667.595	512.194	0.135128	0.382285	0.869256
Q9BXW9	Fanconi anemia group D2 protein OS=Homo sapiens GN=FANCD2 PE=1 SV=2	600.23	596.144	558.089	640.025	632.961	592.963	584.821	621.983	0.135313	-0.0888799	0.868659
Q96AG4	Leucine-rich repeat-containing protein 59 OS=Homo sapiens GN=LRRC59 PE=1 SV=1	765.978	644.634	576.946	541.284	578.741	488.3	662.52	536.108	0.135363	0.305439	0.868499
O43172	U4/U6 small nuclear ribonucleoprotein Prp4 OS=Homo sapiens GN=PRPF4 PE=1 SV=2	631.762	627.281	614.654	576.809	541.827	612.009	624.566	576.882	0.135591	0.114578	0.867768
P23142	Fibulin-1 OS=Homo sapiens GN=FBLN1 PE=1 SV=4	665.582	565.548	753.016	451.358	584.982	560.973	661.382	532.438	0.135949	0.31287	0.866625
Q9UBQ7	Glyoxylate reductase/hydroxypyruvate reductase OS=Homo sapiens GN=GRHPR PE=1 SV=1	511.528	600.96	537.448	576.463	727.268	646.404	549.979	650.045	0.136176	-0.241164	0.8659
Q15022	Polycomb protein SUZ12 OS=Homo sapiens GN=SUZ12 PE=1 SV=3	656.093	575.533	741.603	548.487	480.767	603.843	657.743	544.366	0.136385	0.272948	0.865232
Q8IV08	Phospholipase D3 OS=Homo sapiens GN=PLD3 PE=1 SV=1	796.691	668.404	582.613	536.733	402.148	616.785	682.569	518.555	0.136694	0.396477	0.864249
Q6P1Q0	LETM1 domain-containing protein 1 OS=Homo sapiens GN=LETMD1 PE=1 SV=1	630.757	538.833	542.943	623.745	672.629	620.589	570.844	638.988	0.137508	-0.162691	0.861673
Q8WW12	PEST proteolytic signal-containing nuclear protein OS=Homo sapiens GN=PCNP PE=1 SV=2	802.316	644.935	656.365	653.952	360.899	509.949	701.205	508.267	0.137694	0.46425	0.861084
A0A0A0MT23	MAP/microtubule affinity-regulating kinase 3 OS=Homo sapiens GN=MARK3 PE=1 SV=1	512.342	619.454	554.907	642.862	690.157	590.003	562.234	641.007	0.137819	-0.18917	0.86069
Q6ZSZ5	Rho guanine nucleotide exchange factor 18 OS=Homo sapiens GN=ARHGEF18 PE=1 SV=3	606.01	565.815	570.012	600.229	663.002	611.81	580.612	625.014	0.138066	-0.106313	0.859913
P49840	Glycogen synthase kinase-3 alpha OS=Homo sapiens GN=GSK3A PE=1 SV=2	488.792	524.606	641.188	611.927	661.778	693.003	551.529	655.569	0.138176	-0.249313	0.859568
Q17R31	Putative deoxyribonuclease TATDN3 OS=Homo sapiens GN=TATDN3 PE=1 SV=1	423.814	611.094	500.799	561.671	816.14	675.85	511.903	684.553	0.138315	-0.419294	0.859132
E9PKG0	Plectin (Fragment) OS=Homo sapiens GN=PLEC PE=1 SV=1	577.322	613.587	500.504	613.078	681.854	625.244	563.804	640.059	0.138465	-0.18301	0.858659
Q9Y2V7	Conserved oligomeric Golgi complex subunit 6 OS=Homo sapiens GN=COG6 PE=1 SV=2	563.788	568.155	584.37	591.832	625.909	681.768	572.104	633.17	0.138653	-0.146314	0.858072
Q9Y2S7	Polymerase delta-interacting protein 2 OS=Homo sapiens GN=POLDIP2 PE=1 SV=1	543.205	624.68	547.489	632	618.598	647.216	571.791	632.605	0.138722	-0.145816	0.857853
Q8IYS0	GRAM domain-containing protein 1C OS=Homo sapiens GN=GRAMD1C PE=1 SV=2	455.627	619.624	391.501	602.95	900.314	627.725	488.917	710.329	0.138918	-0.538899	0.857241
B0QZ18	Copine-1 OS=Homo sapiens GN=CPNE1 PE=1 SV=1	608.649	637.713	599.857	568.258	575.172	608.791	615.406	584.074	0.138942	0.0753875	0.857165
Q8IUH3	RNA-binding protein 45 OS=Homo sapiens GN=RBM45 PE=1 SV=1	550.631	520.919	542.912	573.059	762.438	665.843	538.154	667.113	0.138968	-0.309912	0.857085
Q86UU0	B-cell CLL/lymphoma 9-like protein OS=Homo sapiens GN=BCL9L PE=1 SV=1	673.952	711.257	584.671	624.095	545.484	456.718	656.627	542.099	0.139071	0.276517	0.856764
O75928	E3 SUMO-protein ligase PIAS2 OS=Homo sapiens GN=PIAS2 PE=1 SV=3	531.574	512.705	462.277	544.768	841.251	719.769	502.185	701.929	0.139413	-0.483106	0.855697
A0A0D9SF54	Spectrin alpha chain, non-erythrocytic 1 OS=Homo sapiens GN=SPTAN1 PE=1 SV=1	610.547	599.988	654.336	562.492	564.451	610.988	621.623	579.31	0.139533	0.101705	0.855324
Q92545	Transmembrane protein 131 OS=Homo sapiens GN=TMEM131 PE=1 SV=3	635.29	605.653	691.964	560.349	489.543	621.564	644.302	557.152	0.140386	0.209666	0.852677
Q86U44	N6-adenosine-methyltransferase 70 kDa subunit OS=Homo sapiens GN=METTL3 PE=1 SV=2	703.346	597.734	625.082	617.545	525.294	551.643	642.054	564.827	0.14041	0.184885	0.852603
A6NHB5	Zinc finger MYM-type protein 3 OS=Homo sapiens GN=ZMYM3 PE=1 SV=1	604.906	624.695	836.112	492.471	397.328	626.828	688.571	505.542	0.140571	0.445774	0.852105
Q99973	Telomerase protein component 1 OS=Homo sapiens GN=TEP1 PE=1 SV=2	473.23	544.201	595.236	606.565	616.152	787.274	537.556	669.997	0.140848	-0.31774	0.851249
Q8WUU5	GATA zinc finger domain-containing protein 1 OS=Homo sapiens GN=GATAD1 PE=1 SV=1	481.1	599.648	474.455	650.039	828.12	577.438	518.401	685.199	0.141204	-0.402454	0.850151
Q9NW08	DNA-directed RNA polymerase III subunit RPC2 OS=Homo sapiens GN=POLR3B PE=1 SV=2	588.514	596.388	559.629	648.545	586.341	645.894	581.51	626.927	0.141702	-0.108491	0.848624
Q8N1G0	Zinc finger protein 687 OS=Homo sapiens GN=ZNF687 PE=1 SV=1	546.118	737.341	795.192	489.095	360.021	632.53	692.884	493.882	0.141787	0.488446	0.848363
A0A087WSV8	Nucleobindin 2, isoform CRA_b OS=Homo sapiens GN=NUCB2 PE=1 SV=1	810.169	554.463	689.498	532.671	554.385	468.063	684.71	518.373	0.142097	0.401503	0.847414
Q9BX63	Fanconi anemia group J protein OS=Homo sapiens GN=BRIP1 PE=1 SV=1	565.791	602.202	487.761	656.735	729.596	577.471	551.918	654.601	0.142161	-0.246161	0.84722
Q13131	5'-AMP-activated protein kinase catalytic subunit alpha-1 OS=Homo sapiens GN=PRKAA1 PE=1 SV=4	660.777	609.831	599.897	604.973	571.071	566.571	623.502	580.872	0.142176	0.102173	0.847172
P23469	Receptor-type tyrosine-protein phosphatase epsilon OS=Homo sapiens GN=PTPRE PE=1 SV=1	503.896	513.635	545.398	544.333	736.471	769.465	520.976	683.423	0.142776	-0.39156	0.845346
A0A087WUS5	Myc proto-oncogene protein OS=Homo sapiens GN=MYC PE=1 SV=1	667.21	350.894	455.454	974.592	590.221	715.636	491.186	760.15	0.142944	-0.630015	0.844835
Q8IW45	ATP-dependent (S)-NAD(P)H-hydrate dehydratase OS=Homo sapiens GN=CARKD PE=1 SV=1	689.538	474.607	352.105	800.231	742.024	630.121	505.417	724.125	0.143425	-0.518766	0.843376
Q96J42	Thioredoxin domain-containing protein 15 OS=Homo sapiens GN=TXNDC15 PE=1 SV=1	641.069	523.182	474.611	692.414	735.465	580.049	546.287	669.309	0.143827	-0.293014	0.842161
Q8N6H7	ADP-ribosylation factor GTPase-activating protein 2 OS=Homo sapiens GN=ARFGAP2 PE=1 SV=1	732.965	608.117	614.337	621.174	509.176	535.72	651.806	555.357	0.144343	0.231029	0.840605
J3QQT0	Protein-methionine sulfoxide oxidase MICAL3 (Fragment) OS=Homo sapiens GN=MICAL3 PE=1 SV=6	655.343	572.46	756.592	544.7	520.776	552.108	661.465	539.195	0.144632	0.294858	0.839736
P62273	40S ribosomal protein S29 OS=Homo sapiens GN=RPS29 PE=1 SV=2	692.498	602.715	842.513	516.616	303.508	642.559	712.576	487.561	0.144799	0.547461	0.839236
Q9P021	Cysteine-rich PDZ-binding protein OS=Homo sapiens GN=CRIPT PE=1 SV=1	653.156	584.181	1143.28	466.044	304.371	419.502	793.539	396.639	0.144951	1.00048	0.838779
P43243	Matrin-3 OS=Homo sapiens GN=MATR3 PE=1 SV=2	648.779	581.134	652.323	587.899	585.249	555.808	627.412	576.319	0.145107	0.122546	0.838311
C9JLB7	Oxidoreductase NAD-binding domain-containing protein 1 OS=Homo sapiens GN=OXNAD1 PE=1 SV=2	621.551	558.428	536.413	688.703	588.27	650.726	572.131	642.566	0.145265	-0.167501	0.83784
Q7L804	Rab11 family-interacting protein 2 OS=Homo sapiens GN=RAB11FIP2 PE=1 SV=1	588.978	439.753	597.368	795.182	669.02	590.111	542.033	684.771	0.14545	-0.337241	0.837287
Q9NXN4	Ganglioside-induced differentiation-associated protein 2 OS=Homo sapiens GN=GDAP2 PE=1 SV=1	562.508	678.582	677.768	551.129	520.539	592.342	639.619	554.67	0.145655	0.205585	0.836675
P51858	Hepatoma-derived growth factor OS=Homo sapiens GN=HDGF PE=1 SV=1	586.192	640.273	741.488	431.006	558.917	603.742	655.984	531.222	0.145665	0.304348	0.836644
Q9UPW6	DNA-binding protein SATB2 OS=Homo sapiens GN=SATB2 PE=1 SV=2	582.548	564.781	579.369	667.651	583.174	657.429	575.566	636.085	0.145901	-0.144237	0.835943
P14923	Junction plakoglobin OS=Homo sapiens GN=JUP PE=1 SV=3	564.368	684.511	758.437	476.247	444.153	639.271	669.105	519.891	0.145986	0.364025	0.835688
Q9UBX3	Mitochondrial dicarboxylate carrier OS=Homo sapiens GN=SLC25A10 PE=1 SV=2	572.173	617.452	545.219	616.169	606.335	656.199	578.281	626.234	0.146006	-0.114931	0.835628
Q9BX10	GTP-binding protein 2 OS=Homo sapiens GN=GTPBP2 PE=1 SV=1	569.482	598.856	539.523	701.827	585.991	640.387	569.287	642.735	0.146294	-0.175068	0.834775
Q96IU4	Alpha/beta hydrolase domain-containing protein 14B OS=Homo sapiens GN=ABHD14B PE=1 SV=1	633.724	597.44	610.244	593.474	591.118	585.035	613.803	589.876	0.146857	0.0573646	0.833105
P43307	Translocon-associated protein subunit alpha OS=Homo sapiens GN=SSR1 PE=1 SV=3	512.303	605.668	568.757	586.823	696.78	630.488	562.243	638.03	0.146906	-0.182432	0.832961
B1AK88	Capping protein (Actin filament) muscle Z-line, beta, isoform CRA_d OS=Homo sapiens GN=CAPZB PE=1 SV=1	691.526	599.78	611.788	574.49	571.563	560.14	634.364	568.731	0.14733	0.157566	0.831709
Q96EY8	Cob(I)yrinic acid a,c-diamide adenosyltransferase, mitochondrial OS=Homo sapiens GN=MMAB PE=1 SV=1	467.193	611.575	524.524	566.917	662.761	768.175	534.431	665.951	0.14753	-0.317414	0.83112
P51587	Breast cancer type 2 susceptibility protein OS=Homo sapiens GN=BRCA2 PE=1 SV=3	536.705	615.892	451.295	624.051	780.81	599.816	534.631	668.226	0.147541	-0.321793	0.831087
P61266	Syntaxin-1B OS=Homo sapiens GN=STX1B PE=1 SV=1	572.48	770.368	630.299	506.896	484.906	594.655	657.716	528.819	0.147617	0.31469	0.830863
Q14865	AT-rich interactive domain-containing protein 5B OS=Homo sapiens GN=ARID5B PE=1 SV=3	484.802	538.084	504.906	589.98	855.28	636.504	509.264	693.922	0.148222	-0.446358	0.829086
J3QL71	Secernin-2 OS=Homo sapiens GN=SCRN2 PE=1 SV=1	510.014	577.259	563.669	570.943	730.322	650.071	550.314	650.445	0.148737	-0.241172	0.827581
A0A0A0MTE8	Neuron navigator 2 OS=Homo sapiens GN=NAV2 PE=1 SV=1	702.434	683.031	569.391	627.044	516.203	509.305	651.618	550.851	0.148841	0.242366	0.827278
Q00169	Phosphatidylinositol transfer protein alpha isoform OS=Homo sapiens GN=PITPNA PE=1 SV=2	668.496	620.907	709.73	567.542	419.758	620.302	666.378	535.867	0.149224	0.314464	0.826161
Q9NPA0	ER membrane protein complex subunit 7 OS=Homo sapiens GN=EMC7 PE=1 SV=1	500.789	621.791	494.469	627.297	769.002	591.325	539.016	662.541	0.149487	-0.297682	0.825395
B7Z8V7	NAD kinase 2, mitochondrial OS=Homo sapiens GN=NADK2 PE=1 SV=1	514.969	574.084	600.531	607.487	606.729	712.974	563.195	642.397	0.149533	-0.189831	0.825262
Q9BUN8	Derlin-1 OS=Homo sapiens GN=DERL1 PE=1 SV=1	623.725	562.548	563.609	649.191	611.029	621.654	583.294	627.291	0.149724	-0.104912	0.824707
Q13751	Laminin subunit beta-3 OS=Homo sapiens GN=LAMB3 PE=1 SV=1	726.558	560.54	678.981	530.751	511.658	601.786	655.36	548.065	0.149849	0.25794	0.824347
P53350	Serine/threonine-protein kinase PLK1 OS=Homo sapiens GN=PLK1 PE=1 SV=1	632.367	555.054	521.091	696.011	631.291	608.464	569.504	645.255	0.14986	-0.180164	0.824316
P11021	78 kDa glucose-regulated protein OS=Homo sapiens GN=HSPA5 PE=1 SV=2	587.633	563.885	561.828	623.873	690.924	591.787	571.115	635.528	0.15008	-0.154173	0.823676
Q9BWH2	FUN14 domain-containing protein 2 OS=Homo sapiens GN=FUNDC2 PE=1 SV=2	602.93	741.294	599.03	580.436	497.676	560.94	647.751	546.351	0.150192	0.245614	0.823354
Q8WV41	Sorting nexin-33 OS=Homo sapiens GN=SNX33 PE=1 SV=1	542.237	706.302	831.028	462.638	380.424	635.5	693.189	492.854	0.150201	0.492089	0.823327
Q9UQQ2	SH2B adapter protein 3 OS=Homo sapiens GN=SH2B3 PE=1 SV=2	618.108	542.254	552.972	643.803	586.719	694.36	571.111	641.627	0.150626	-0.167964	0.8221
Q969T4	Ubiquitin-conjugating enzyme E2 E3 OS=Homo sapiens GN=UBE2E3 PE=1 SV=1	675.121	649.699	621.316	532.91	633.114	471.618	648.712	545.881	0.150674	0.248993	0.821962
Q9BTE7	DCN1-like protein 5 OS=Homo sapiens GN=DCUN1D5 PE=1 SV=1	558.851	605.607	572.181	601.574	663.362	605.163	578.879	623.366	0.150775	-0.106817	0.82167
O43175	D-3-phosphoglycerate dehydrogenase OS=Homo sapiens GN=PHGDH PE=1 SV=4	748.29	583.464	631.809	523.323	545.384	572.656	654.521	547.121	0.150896	0.25858	0.821321
P04004	Vitronectin OS=Homo sapiens GN=VTN PE=1 SV=1	468.915	515.441	470.246	567.656	916.879	669.232	484.867	717.922	0.150945	-0.566238	0.82118
P42694	Probable helicase with zinc finger domain OS=Homo sapiens GN=HELZ PE=1 SV=2	539.129	619.811	564.307	596.173	633.503	652.094	574.415	627.257	0.151022	-0.126962	0.820961
H7BYJ1	E3 ubiquitin-protein ligase RNF34 OS=Homo sapiens GN=RNF34 PE=1 SV=1	531.736	560.351	515.144	580.877	780.412	639.916	535.744	667.068	0.151092	-0.316291	0.820758
Q9BUM1	Glucose-6-phosphatase 3 OS=Homo sapiens GN=G6PC3 PE=1 SV=2	447.735	614.544	506.683	598.807	812.071	615.941	522.987	675.606	0.15111	-0.369406	0.820707
Q5VW32	BRO1 domain-containing protein BROX OS=Homo sapiens GN=BROX PE=1 SV=1	519.654	572.377	570.952	569.984	718.327	652.481	554.328	646.931	0.151742	-0.222872	0.818893
P78524	Suppression of tumorigenicity 5 protein OS=Homo sapiens GN=ST5 PE=1 SV=3	493.917	601.717	498.661	592.351	794.957	618.751	531.432	668.686	0.151839	-0.331445	0.818617
O43913	Origin recognition complex subunit 5 OS=Homo sapiens GN=ORC5 PE=1 SV=1	544.852	617.11	543.317	674.073	576.69	670.509	568.426	640.424	0.152087	-0.172055	0.817908
O43808	Peroxisomal membrane protein PMP34 OS=Homo sapiens GN=SLC25A17 PE=1 SV=1	619.894	690.046	743.484	585.928	355.595	600.446	684.474	513.99	0.152087	0.413257	0.817907
O15084	Serine/threonine-protein phosphatase 6 regulatory ankyrin repeat subunit A OS=Homo sapiens GN=ANKRD28 PE=1 SV=5	535.373	573.064	604.788	601.943	686.69	607.814	571.075	632.149	0.152343	-0.146584	0.817178
P35270	Sepiapterin reductase OS=Homo sapiens GN=SPR PE=1 SV=1	684.482	563.526	702.244	522.781	513.902	618.401	650.084	551.694	0.152574	0.236757	0.816519
Q9NVJ2	ADP-ribosylation factor-like protein 8B OS=Homo sapiens GN=ARL8B PE=1 SV=1	690.128	655.877	590.356	585.528	603.985	471.354	645.453	553.623	0.152727	0.22141	0.816084
Q9P2K3	REST corepressor 3 OS=Homo sapiens GN=RCOR3 PE=1 SV=2	542.218	608.101	556.206	574.817	660.704	660.28	568.842	631.934	0.153055	-0.151746	0.815152
Q96CU9	FAD-dependent oxidoreductase domain-containing protein 1 OS=Homo sapiens GN=FOXRED1 PE=1 SV=2	491.859	612.019	558.481	573.797	703.565	657.094	554.12	644.819	0.153372	-0.218696	0.814255
A0A0A0MQR2	Protein RTF2 homolog OS=Homo sapiens GN=RTFDC1 PE=1 SV=1	528.959	860.729	755.084	527.074	270.601	605.772	714.924	467.816	0.154115	0.61185	0.812156
P31350	Ribonucleoside-diphosphate reductase subunit M2 OS=Homo sapiens GN=RRM2 PE=1 SV=1	517.744	528.179	553.079	791.689	553.571	726.033	533.001	690.431	0.154229	-0.37336	0.811835
Q9Y2D4	Exocyst complex component 6B OS=Homo sapiens GN=EXOC6B PE=1 SV=3	601.663	642.229	616.714	562.433	556.203	617.066	620.202	578.567	0.154797	0.100252	0.810237
Q7Z4H3	HD domain-containing protein 2 OS=Homo sapiens GN=HDDC2 PE=1 SV=1	694.477	636.258	703.251	598.064	385.577	594.857	677.995	526.166	0.154864	0.365757	0.81005
Q96A23	Copine-4 OS=Homo sapiens GN=CPNE4 PE=1 SV=1	468.303	600.27	586.554	578.67	691.338	673.707	551.709	647.905	0.155049	-0.231875	0.809531
P10586	Receptor-type tyrosine-protein phosphatase F OS=Homo sapiens GN=PTPRF PE=1 SV=2	626.038	564.487	547.5	666.982	603.196	628.383	579.342	632.854	0.155646	-0.127458	0.807863
O95147	Dual specificity protein phosphatase 14 OS=Homo sapiens GN=DUSP14 PE=1 SV=1	531.894	700.832	849.183	567.07	393.306	534.138	693.97	498.172	0.155804	0.47823	0.807422
Q9Y5X3	Sorting nexin-5 OS=Homo sapiens GN=SNX5 PE=1 SV=1	588.798	524.285	615.001	635.993	601.017	669.335	576.028	635.449	0.156377	-0.141636	0.805827
Q12873	Chromodomain-helicase-DNA-binding protein 3 OS=Homo sapiens GN=CHD3 PE=1 SV=3	684.334	686.256	643.92	660.129	462.351	473.862	671.503	532.114	0.156494	0.335659	0.805501
Q6PFW1	Inositol hexakisphosphate and diphosphoinositol-pentakisphosphate kinase 1 OS=Homo sapiens GN=PPIP5K1 PE=1 SV=1	548.843	591.875	490.257	641.886	766.389	576.578	543.658	661.618	0.156658	-0.283298	0.805047
P36897	TGF-beta receptor type-1 OS=Homo sapiens GN=TGFBR1 PE=1 SV=1	453.88	625.182	553.297	579.392	695.122	688.332	544.12	654.282	0.156742	-0.265989	0.804816
M0QZR4	Rho guanine nucleotide exchange factor 1 OS=Homo sapiens GN=ARHGEF1 PE=1 SV=1	566.517	664.033	664.89	541.258	572.733	572.004	631.813	561.999	0.156784	0.168931	0.8047
O60469	Down syndrome cell adhesion molecule OS=Homo sapiens GN=DSCAM PE=1 SV=2	414.937	621.498	529.082	640.349	808.065	586.001	521.839	678.138	0.157063	-0.377974	0.803925
P98160	Basement membrane-specific heparan sulfate proteoglycan core protein OS=Homo sapiens GN=HSPG2 PE=1 SV=4	600.661	604.878	788.354	550.442	487.336	562.911	664.631	533.563	0.157416	0.316894	0.80295
Q9Y2G2	Caspase recruitment domain-containing protein 8 OS=Homo sapiens GN=CARD8 PE=1 SV=1	504.875	609.073	464.084	549.722	785.541	680.989	526.011	672.084	0.157657	-0.353549	0.802287
O15143	Actin-related protein 2/3 complex subunit 1B OS=Homo sapiens GN=ARPC1B PE=1 SV=3	608.565	620.166	666.157	577.757	515.633	615.489	631.629	569.626	0.157699	0.149062	0.80217
P63104	14-3-3 protein zeta/delta OS=Homo sapiens GN=YWHAZ PE=1 SV=1	610.153	605.045	697.3	536.838	522.458	624.856	637.499	561.384	0.157744	0.183435	0.802048
H0Y599	Dedicator of cytokinesis protein 4 (Fragment) OS=Homo sapiens GN=DOCK4 PE=1 SV=1	735.183	566.085	784.289	664.691	399.047	485.454	695.186	516.397	0.157771	0.428918	0.801974
Q9Y4P3	Transducin beta-like protein 2 OS=Homo sapiens GN=TBL2 PE=1 SV=1	604.875	607.963	658.03	566.577	548.643	616.451	623.623	577.224	0.158082	0.111543	0.801118
Q9NY93	Probable ATP-dependent RNA helicase DDX56 OS=Homo sapiens GN=DDX56 PE=1 SV=1	566.932	593.342	578.293	661.415	583.537	643.305	579.522	629.419	0.158743	-0.119157	0.799306
Q8N8R5	UPF0565 protein C2orf69 OS=Homo sapiens GN=C2orf69 PE=1 SV=1	543.791	600.926	591.038	618.467	661.501	593.688	578.585	624.552	0.159027	-0.110293	0.798528
H3BMD8	cAMP-regulated phosphoprotein 19 OS=Homo sapiens GN=ARPP19 PE=1 SV=1	935.35	648.428	623.358	694.962	404.628	329.971	735.712	476.52	0.159225	0.626604	0.797988
Q15173	Serine/threonine-protein phosphatase 2A 56 kDa regulatory subunit beta isoform OS=Homo sapiens GN=PPP2R5B PE=1 SV=1	407.471	548.566	589.795	536.358	797.032	714.298	515.278	682.563	0.159243	-0.405612	0.797939
P83111	Serine beta-lactamase-like protein LACTB, mitochondrial OS=Homo sapiens GN=LACTB PE=1 SV=2	707.538	584.829	691.961	539.481	447.21	638.876	661.443	541.856	0.159474	0.287708	0.797311
Q9BZL1	Ubiquitin-like protein 5 OS=Homo sapiens GN=UBL5 PE=1 SV=1	688.404	643.772	854.572	623.15	237.237	567.785	728.916	476.057	0.159506	0.614617	0.797224
R4GN08	Actin-related protein 2/3 complex subunit 4 (Fragment) OS=Homo sapiens GN=ARPC4 PE=1 SV=1	477.521	557.598	433.06	586.179	922.215	627.999	489.393	712.131	0.159897	-0.541149	0.796159
P61024	Cyclin-dependent kinases regulatory subunit 1 OS=Homo sapiens GN=CKS1B PE=1 SV=1	772.565	712.292	600.901	541.286	330.653	639.923	695.253	503.954	0.160221	0.464246	0.795279
A0A096LPI6	Uncharacterized protein (Fragment) OS=Homo sapiens PE=4 SV=2	558.857	539.993	613.604	636.696	585.739	696.777	570.818	639.737	0.160635	-0.164449	0.794159
Q9H7Z6	Histone acetyltransferase KAT8 OS=Homo sapiens GN=KAT8 PE=1 SV=2	726.721	621.653	611.305	631.916	480.791	550.297	653.226	554.335	0.160648	0.236825	0.794125
W0Z7M9	MKL/myocardin-like protein 1 OS=Homo sapiens GN=mkl1 PE=1 SV=1	642.757	616.962	608.687	614.425	583.366	545.045	622.802	580.945	0.160905	0.100371	0.793431
Q5T160	Probable arginine--tRNA ligase, mitochondrial OS=Homo sapiens GN=RARS2 PE=1 SV=1	543.162	614.345	571.712	629.101	589.893	667.199	576.406	628.731	0.16102	-0.125358	0.79312
Q9UKK6	NTF2-related export protein 1 OS=Homo sapiens GN=NXT1 PE=1 SV=1	602.426	622.814	897.331	636.384	367.614	480.685	707.524	494.894	0.161502	0.515658	0.791822
Q96MF7	E3 SUMO-protein ligase NSE2 OS=Homo sapiens GN=NSMCE2 PE=1 SV=2	666.872	652.999	799.006	540.327	295.341	642.124	706.292	492.598	0.161903	0.519856	0.790746
Q8TD55	Pleckstrin homology domain-containing family O member 2 OS=Homo sapiens GN=PLEKHO2 PE=1 SV=1	646.112	724.909	585.909	637.247	486.453	518.882	652.31	547.527	0.162111	0.252627	0.790189
J3KTD8	Core-binding factor subunit beta (Fragment) OS=Homo sapiens GN=CBFB PE=1 SV=1	588.069	899.019	605.952	512.587	354.172	582.949	697.68	483.236	0.162277	0.529837	0.789744
P28070	Proteasome subunit beta type-4 OS=Homo sapiens GN=PSMB4 PE=1 SV=4	588.294	613.865	479.351	659.871	656.346	626.476	560.503	647.564	0.162561	-0.2083	0.788984
Q92845	Kinesin-associated protein 3 OS=Homo sapiens GN=KIFAP3 PE=1 SV=2	642.399	712.787	733.609	583.928	316.317	604.854	696.265	501.699	0.16309	0.472813	0.787572
P00338	L-lactate dehydrogenase A chain OS=Homo sapiens GN=LDHA PE=1 SV=2	642.803	678.363	699.694	515.524	399.794	649.135	673.62	521.484	0.163508	0.369312	0.786461
P30043	Flavin reductase (NADPH) OS=Homo sapiens GN=BLVRB PE=1 SV=3	616.509	613.583	687.882	472.708	580.983	607.155	639.325	553.615	0.16386	0.207665	0.785528
Q9H857	5'-nucleotidase domain-containing protein 2 OS=Homo sapiens GN=NT5DC2 PE=1 SV=1	548.512	581.572	579.946	576.104	642.708	679.626	570.01	632.813	0.163982	-0.150792	0.785203
Q04206	Transcription factor p65 OS=Homo sapiens GN=RELA PE=1 SV=2	579.952	655.278	630.841	577.884	561.447	588.824	622.024	576.051	0.164058	0.110772	0.785003
Q92698	DNA repair and recombination protein RAD54-like OS=Homo sapiens GN=RAD54L PE=1 SV=2	525.871	433.642	653.356	588.761	686.239	748.298	537.623	674.433	0.164311	-0.327081	0.784333
A0A0A0MT26	Sodium/potassium-transporting ATPase subunit alpha-3 OS=Homo sapiens GN=ATP1A3 PE=1 SV=1	624.931	571.235	546.132	643.791	635.76	606.305	580.766	628.619	0.164503	-0.114228	0.783826
O15357	Phosphatidylinositol 3,4,5-trisphosphate 5-phosphatase 2 OS=Homo sapiens GN=INPPL1 PE=1 SV=2	531.654	607.814	553.386	670.985	568.522	695.429	564.285	644.979	0.164532	-0.192828	0.783749
Q9NW38	E3 ubiquitin-protein ligase FANCL OS=Homo sapiens GN=FANCL PE=1 SV=2	541.69	528.984	621.846	597.509	618.605	714.736	564.173	643.616	0.164782	-0.190063	0.783091
Q9NUS5	AP-5 complex subunit sigma-1 OS=Homo sapiens GN=AP5S1 PE=1 SV=1	539.84	639.499	470.737	599.997	692.955	660.854	550.025	651.269	0.164809	-0.243755	0.783019
P54725	UV excision repair protein RAD23 homolog A OS=Homo sapiens GN=RAD23A PE=1 SV=1	682.758	587.071	749.562	573.64	401.639	619.697	673.13	531.659	0.164923	0.340385	0.782719
H0YL18	Beta-2-microglobulin OS=Homo sapiens GN=B2M PE=1 SV=1	898.781	607.247	821.092	521.424	107.115	665.18	775.707	431.24	0.164967	0.847021	0.782604
A0A087WTT2	Transmembrane protein 230 OS=Homo sapiens GN=TMEM230 PE=1 SV=1	732.458	635.4	757.803	579.132	290.708	617.37	708.554	495.737	0.165056	0.515302	0.782368
P14927	Cytochrome b-c1 complex subunit 7 OS=Homo sapiens GN=UQCRB PE=1 SV=2	540.126	582.006	613.96	594.097	643.168	635.499	578.697	624.255	0.165286	-0.109325	0.781765
Q4VX76	Synaptotagmin-like protein 3 OS=Homo sapiens GN=SYTL3 PE=2 SV=3	502.367	606.345	463.834	636.54	823.903	575.223	524.182	678.555	0.165726	-0.372399	0.78061
Q9H9A7	RecQ-mediated genome instability protein 1 OS=Homo sapiens GN=RMI1 PE=1 SV=3	609.484	687.079	610.563	613.25	576.076	497.859	635.709	562.395	0.165823	0.176782	0.780354
Q9Y5Y0	Feline leukemia virus subgroup C receptor-related protein 1 OS=Homo sapiens GN=FLVCR1 PE=1 SV=1	465.012	640.424	486.621	576.587	774.428	647.264	530.686	666.093	0.165944	-0.327866	0.780039
Q9UH99	SUN domain-containing protein 2 OS=Homo sapiens GN=SUN2 PE=1 SV=3	617.668	555.361	519.062	645.286	710.769	580.177	564.031	645.411	0.166326	-0.194443	0.779041
A0A087WUW9	ADP-ribosylation factor-like protein 15 OS=Homo sapiens GN=ARL15 PE=1 SV=1	522.669	590.06	536.831	556.097	720.803	673.103	549.853	650.001	0.166331	-0.241394	0.779027
Q9NSP4	Centromere protein M OS=Homo sapiens GN=CENPM PE=1 SV=1	578.233	648.675	685.307	569.642	500.211	612.613	637.405	560.822	0.166894	0.184667	0.77756
Q13813	Spectrin alpha chain, non-erythrocytic 1 OS=Homo sapiens GN=SPTAN1 PE=1 SV=3	613.006	599.065	656.837	569.825	550.471	616.136	622.97	578.811	0.167122	0.106071	0.776966
Q9HAU0	Pleckstrin homology domain-containing family A member 5 OS=Homo sapiens GN=PLEKHA5 PE=1 SV=1	591.592	584.762	597.279	624.597	627.317	591.826	591.211	614.58	0.168421	-0.0559278	0.773605
Q9Y3B2	Exosome complex component CSL4 OS=Homo sapiens GN=EXOSC1 PE=1 SV=1	608.857	566.687	537.431	713.697	618.838	598.629	570.991	643.721	0.168421	-0.172967	0.773603
Q6ZNJ1	Neurobeachin-like protein 2 OS=Homo sapiens GN=NBEAL2 PE=1 SV=2	598.364	605.385	612.886	591.94	600.987	597.731	605.545	596.886	0.168761	0.0207792	0.772727
E7EQ69	N-alpha-acetyltransferase 50 OS=Homo sapiens GN=NAA50 PE=1 SV=1	568.391	516.185	628.623	602.959	644.925	664.166	571.066	637.35	0.168765	-0.158428	0.772718
P13473	Lysosome-associated membrane glycoprotein 2 OS=Homo sapiens GN=LAMP2 PE=1 SV=2	407.076	969.406	922.439	236.196	270.043	647.314	766.307	384.518	0.16883	0.994872	0.772551
J3QRL7	N-acetyltransferase 9 OS=Homo sapiens GN=NAT9 PE=1 SV=1	469.408	609.527	555.113	580.288	633.992	755.675	544.683	656.652	0.168969	-0.269712	0.772194
P00813	Adenosine deaminase OS=Homo sapiens GN=ADA PE=1 SV=3	586.749	518.392	619.16	633.57	603.331	673.618	574.767	636.839	0.169056	-0.147952	0.77197
M0QXZ5	Zinc finger protein 428 (Fragment) OS=Homo sapiens GN=ZNF428 PE=1 SV=1	637.592	648.999	964.999	598.91	171.273	582.886	750.53	451.023	0.169458	0.734709	0.770937
Q16763	Ubiquitin-conjugating enzyme E2 S OS=Homo sapiens GN=UBE2S PE=1 SV=2	540.659	637.415	504.742	643.573	635.35	652.666	560.939	643.863	0.169522	-0.198911	0.770774
Q9UNP9	Peptidyl-prolyl cis-trans isomerase E OS=Homo sapiens GN=PPIE PE=1 SV=1	591.127	679.648	604.547	551.476	598.351	557.725	625.107	569.184	0.169559	0.135208	0.77068
A0A0B4J1R7	Protein BORCS7-ASMT OS=Homo sapiens GN=BORCS7-ASMT PE=4 SV=1	569.851	731.485	624.4	498.142	600.696	533.887	641.912	544.242	0.170119	0.238128	0.769248
Q8IW50	Protein FAM219A OS=Homo sapiens GN=FAM219A PE=1 SV=3	562.548	575.956	449.875	796.233	734.773	535.175	529.46	688.727	0.170326	-0.379411	0.76872
O95202	LETM1 and EF-hand domain-containing protein 1, mitochondrial OS=Homo sapiens GN=LETM1 PE=1 SV=1	523.534	574.041	541.144	592.6	762.597	612.677	546.24	655.958	0.170341	-0.264069	0.76868
P49641	Alpha-mannosidase 2x OS=Homo sapiens GN=MAN2A2 PE=2 SV=3	424.525	603.76	542.749	532.23	744.053	740.587	523.678	672.29	0.170542	-0.360404	0.768168
Q8IUX7	Adipocyte enhancer-binding protein 1 OS=Homo sapiens GN=AEBP1 PE=1 SV=1	600.768	699.815	597.806	497.292	601.253	571.451	632.796	556.665	0.170763	0.184931	0.767606
Q0ZGT2	Nexilin OS=Homo sapiens GN=NEXN PE=1 SV=1	748.711	597.768	609.357	592.863	517.383	552.544	651.945	554.263	0.170872	0.234179	0.76733
A0A096LPH6	Zinc finger protein 638 OS=Homo sapiens GN=ZNF638 PE=1 SV=1	668.011	649.337	580.892	598.676	594.189	511.304	632.747	568.056	0.171436	0.155595	0.765899
Q9NVC6	Mediator of RNA polymerase II transcription subunit 17 OS=Homo sapiens GN=MED17 PE=1 SV=2	567.457	668.573	670.645	485.891	607.737	566.447	635.558	553.358	0.171588	0.199811	0.765512
Q9UH62	Armadillo repeat-containing X-linked protein 3 OS=Homo sapiens GN=ARMCX3 PE=1 SV=1	562.172	707.601	642.404	494.581	592.219	563.565	637.393	550.122	0.171682	0.212431	0.765275
Q8TBN0	Guanine nucleotide exchange factor for Rab-3A OS=Homo sapiens GN=RAB3IL1 PE=1 SV=1	479.635	548.167	509.94	620.594	865.108	588.222	512.581	691.308	0.172289	-0.431549	0.763743
P21580	Tumor necrosis factor alpha-induced protein 3 OS=Homo sapiens GN=TNFAIP3 PE=1 SV=1	614.646	564.403	515.874	723.566	647.111	580.525	564.974	650.401	0.173014	-0.203144	0.761918
Q9BRX2	Protein pelota homolog OS=Homo sapiens GN=PELO PE=1 SV=2	812.121	584.569	646.881	646.55	445.749	499.668	681.19	530.656	0.17304	0.360282	0.761852
P25325	3-mercaptopyruvate sulfurtransferase OS=Homo sapiens GN=MPST PE=1 SV=3	699.718	639.62	622.336	535.968	458.866	644.282	653.892	546.372	0.173105	0.259168	0.761689
Q9Y6I4	Ubiquitin carboxyl-terminal hydrolase 3 OS=Homo sapiens GN=USP3 PE=1 SV=2	718.294	616.787	698.713	607.929	379.351	599.118	677.931	528.799	0.173955	0.358419	0.759562
Q9BQ51	Programmed cell death 1 ligand 2 OS=Homo sapiens GN=PDCD1LG2 PE=1 SV=2	558.786	708.566	692.37	422.268	625.19	534.892	653.241	527.45	0.174064	0.308581	0.759292
O94955	Rho-related BTB domain-containing protein 3 OS=Homo sapiens GN=RHOBTB3 PE=1 SV=2	631.465	549.736	458.95	568.433	723.668	686.966	546.717	659.689	0.174152	-0.270992	0.759072
Q9NR33	DNA polymerase epsilon subunit 4 OS=Homo sapiens GN=POLE4 PE=1 SV=2	737.684	708.861	555.001	485.758	651.218	427.305	667.182	521.427	0.174258	0.355614	0.758807
O00622	Protein CYR61 OS=Homo sapiens GN=CYR61 PE=1 SV=1	533.915	620.592	576.042	627.219	612.793	640.716	576.85	626.909	0.175084	-0.120062	0.756755
Q96JN0	Ligand-dependent corepressor OS=Homo sapiens GN=LCOR PE=1 SV=2	417.481	596.373	465.399	600.654	918.481	596.453	493.084	705.196	0.175167	-0.51619	0.756548
Q7Z7H5	Transmembrane emp24 domain-containing protein 4 OS=Homo sapiens GN=TMED4 PE=1 SV=1	579.811	560.688	583.982	575.297	653.453	659.374	574.827	629.375	0.175184	-0.130792	0.756505
Q8N394	Transmembrane and TPR repeat-containing protein 2 OS=Homo sapiens GN=TMTC2 PE=2 SV=1	531.682	571.802	552.169	580.635	743.701	625.626	551.884	649.987	0.17557	-0.236045	0.755551
Q13889	General transcription factor IIH subunit 3 OS=Homo sapiens GN=GTF2H3 PE=1 SV=2	625.56	557.715	523.7	641.972	585.578	702.243	568.991	643.264	0.175667	-0.177005	0.75531
Q8TDD1	ATP-dependent RNA helicase DDX54 OS=Homo sapiens GN=DDX54 PE=1 SV=2	712.371	632.418	606.478	632.035	474.069	563.466	650.422	556.523	0.175858	0.224935	0.754839
Q86WB0	Nuclear-interacting partner of ALK OS=Homo sapiens GN=ZC3HC1 PE=1 SV=1	433.59	560.258	621.29	648.432	582.194	780.908	538.379	670.511	0.175958	-0.316639	0.754592
A0A087WX08	Gamma-adducin OS=Homo sapiens GN=ADD3 PE=1 SV=1	600.571	599.822	558.28	646.661	623.942	592.214	586.224	620.939	0.176073	-0.082998	0.754306
P14649	Myosin light chain 6B OS=Homo sapiens GN=MYL6B PE=1 SV=1	532.649	719.931	708.652	461.373	611.17	512.333	653.744	528.292	0.176114	0.30739	0.754205
P15153	Ras-related C3 botulinum toxin substrate 2 OS=Homo sapiens GN=RAC2 PE=1 SV=1	593.136	652.218	924.822	231.057	434.132	681.127	723.392	448.772	0.176258	0.688795	0.75385
O60341	Lysine-specific histone demethylase 1A OS=Homo sapiens GN=KDM1A PE=1 SV=2	580.88	601.835	560.398	667.701	585.544	631.142	581.038	628.129	0.176346	-0.112429	0.753634
A6NFX8	ADP-sugar pyrophosphatase OS=Homo sapiens GN=NUDT5 PE=1 SV=1	656.27	616.382	593.286	593.255	550.197	602.074	621.98	581.842	0.176625	0.0962388	0.752948
Q17RG1	BTB/POZ domain-containing protein KCTD19 OS=Homo sapiens GN=KCTD19 PE=2 SV=1	311.463	595.763	564.619	549.295	689.803	882.718	490.615	707.272	0.176634	-0.527675	0.752925
P52565	Rho GDP-dissociation inhibitor 1 OS=Homo sapiens GN=ARHGDIA PE=1 SV=3	637.385	550.617	534.575	652.706	623.316	638.219	574.192	638.08	0.176936	-0.152204	0.752185
Q01831	DNA repair protein complementing XP-C cells OS=Homo sapiens GN=XPC PE=1 SV=4	542.368	556.469	457.262	645.579	853.011	565.912	518.7	688.168	0.176938	-0.40786	0.75218
H0Y6A0	ADP-ribosylation factor GTPase-activating protein 3 (Fragment) OS=Homo sapiens GN=ARFGAP3 PE=1 SV=1	694.46	649.755	592.127	563.379	626.028	466.957	645.447	552.121	0.176955	0.225314	0.752138
Q66K14	TBC1 domain family member 9B OS=Homo sapiens GN=TBC1D9B PE=1 SV=3	710.655	586.037	663.482	559.904	462.185	632.334	653.391	551.475	0.177605	0.244653	0.750546
P25942	Tumor necrosis factor receptor superfamily member 5 OS=Homo sapiens GN=CD40 PE=1 SV=1	466.334	760.43	941.414	261.991	472.57	587.524	722.726	440.695	0.177663	0.71367	0.750404
Q5VV52	Zinc finger protein 691 OS=Homo sapiens GN=ZNF691 PE=1 SV=1	583.492	667.131	642.73	493.288	613.791	570.068	631.118	559.049	0.177764	0.174934	0.750157
Q9NZM5	Glioma tumor suppressor candidate region gene 2 protein OS=Homo sapiens GN=GLTSCR2 PE=1 SV=2	589.345	588.223	502.813	739.396	571.82	658.427	560.127	656.547	0.17786	-0.229146	0.749922
Q8NBM4	Ubiquitin-associated domain-containing protein 2 OS=Homo sapiens GN=UBAC2 PE=1 SV=1	637.425	502.474	528.099	673.001	732.235	570.725	555.999	658.654	0.178398	-0.244437	0.748609
Q86UL3	Glycerol-3-phosphate acyltransferase 4 OS=Homo sapiens GN=AGPAT6 PE=1 SV=1	549.093	622.346	566.115	603.217	636.492	628.264	579.185	622.658	0.178482	-0.104416	0.748405
Q14677	Clathrin interactor 1 OS=Homo sapiens GN=CLINT1 PE=1 SV=1	605.728	595.501	656.421	555.059	589.662	597.861	619.217	580.861	0.178535	0.0922522	0.748277
Q9GZY6	Linker for activation of T-cells family member 2 OS=Homo sapiens GN=LAT2 PE=1 SV=1	499.781	574.146	503.523	555.736	812.591	652.532	525.817	673.62	0.178974	-0.357374	0.74721
O95376	E3 ubiquitin-protein ligase ARIH2 OS=Homo sapiens GN=ARIH2 PE=1 SV=1	556.644	730.272	650.351	518.833	499.423	612.802	645.756	543.686	0.179012	0.248215	0.747119
P54136	Arginine--tRNA ligase, cytoplasmic OS=Homo sapiens GN=RARS PE=1 SV=2	589.505	579.493	585.612	623.438	650.696	588.713	584.87	620.949	0.179066	-0.0863593	0.746987
H0Y860	Stromal interaction molecule 2 OS=Homo sapiens GN=STIM2 PE=1 SV=1	377.947	683.97	443.799	603.086	824.154	650.126	501.906	692.455	0.179115	-0.464305	0.746868
Q9H773	dCTP pyrophosphatase 1 OS=Homo sapiens GN=DCTPP1 PE=1 SV=1	581.41	533.858	516.038	611.915	784.034	593.749	543.769	663.233	0.179457	-0.286522	0.74604
O14744	Protein arginine N-methyltransferase 5 OS=Homo sapiens GN=PRMT5 PE=1 SV=4	536.622	686.785	734.998	500.438	529.136	577.737	652.802	535.77	0.179824	0.28503	0.745152
Q969E8	Pre-rRNA-processing protein TSR2 homolog OS=Homo sapiens GN=TSR2 PE=1 SV=1	474.968	531.235	541.579	518.08	796.144	737.217	515.927	683.814	0.179961	-0.406436	0.744821
Q9NSK0	Kinesin light chain 4 OS=Homo sapiens GN=KLC4 PE=1 SV=3	594.802	651.6	817.316	541.698	346.265	638.91	687.906	508.958	0.180079	0.434665	0.744537
P51790	H(+)/Cl(-) exchange transporter 3 OS=Homo sapiens GN=CLCN3 PE=1 SV=2	549.767	587.207	574.975	578.082	684.635	629.955	570.65	630.891	0.180355	-0.144785	0.743872
O95671	N-acetylserotonin O-methyltransferase-like protein OS=Homo sapiens GN=ASMTL PE=1 SV=3	559.528	582.128	428.723	585.909	834.851	616.167	523.46	678.976	0.180486	-0.375282	0.743557
Q6ZN57	Zinc finger protein 2 homolog OS=Homo sapiens GN=ZFP2 PE=1 SV=1	968.87	559.335	876.783	705.664	58.9069	497.765	801.663	420.779	0.180897	0.929933	0.742569
O95685	Protein phosphatase 1 regulatory subunit 3D OS=Homo sapiens GN=PPP1R3D PE=1 SV=1	634.863	565.908	467.49	680.585	704.86	583.63	556.087	656.359	0.180938	-0.239173	0.742471
O94886	CSC1-like protein 1 OS=Homo sapiens GN=TMEM63A PE=1 SV=3	375.956	629.685	454.329	603.211	929.808	593.758	486.657	708.926	0.180961	-0.54273	0.742415
P35916	Vascular endothelial growth factor receptor 3 OS=Homo sapiens GN=FLT4 PE=1 SV=3	563.602	635.742	431.757	621.941	708.521	649.616	543.7	660.026	0.18105	-0.279711	0.742201
Q9HD40	O-phosphoseryl-tRNA(Sec) selenium transferase OS=Homo sapiens GN=SEPSECS PE=1 SV=2	431.863	585.013	535.118	515.663	741.058	781.476	517.331	679.399	0.181053	-0.393171	0.742195
Q8WYQ5	Microprocessor complex subunit DGCR8 OS=Homo sapiens GN=DGCR8 PE=1 SV=1	791.732	802.919	662.766	529.577	136.237	661.444	752.472	442.419	0.18134	0.766225	0.741507
Q9UQ53	Alpha-1,3-mannosyl-glycoprotein 4-beta-N-acetylglucosaminyltransferase B OS=Homo sapiens GN=MGAT4B PE=1 SV=1	501.126	597.992	569.868	557.597	697.337	672.902	556.329	642.612	0.181555	-0.20801	0.740993
O60551	Glycylpeptide N-tetradecanoyltransferase 2 OS=Homo sapiens GN=NMT2 PE=1 SV=1	480.904	626.71	570.221	607.812	647.371	670.026	559.278	641.737	0.181854	-0.198415	0.740277
Q15323	Keratin, type I cuticular Ha1 OS=Homo sapiens GN=KRT31 PE=1 SV=3	704.879	605.397	596.673	579.594	576.02	547.432	635.65	567.682	0.182115	0.16315	0.739655
A0A087WZT2	Methyltransferase-like protein 7B OS=Homo sapiens GN=METTL7B PE=1 SV=1	689.146	595.668	614.099	505.095	589.134	602.458	632.971	565.563	0.182292	0.162453	0.739233
Q13643	Four and a half LIM domains protein 3 OS=Homo sapiens GN=FHL3 PE=1 SV=4	546.434	641.359	928.346	412.622	407.287	618.216	705.38	479.375	0.18256	0.557246	0.738595
Q96AE7	Tetratricopeptide repeat protein 17 OS=Homo sapiens GN=TTC17 PE=1 SV=1	523.882	556.936	558.932	564.405	754.094	646.343	546.583	654.947	0.182971	-0.260938	0.737618
O43665	Regulator of G-protein signaling 10 OS=Homo sapiens GN=RGS10 PE=1 SV=2	512.28	554.924	565.284	560.396	759.999	650.265	544.163	656.887	0.183296	-0.271606	0.736846
P54819	Adenylate kinase 2, mitochondrial OS=Homo sapiens GN=AK2 PE=1 SV=2	652.741	579.15	640.937	574.881	573.8	589.584	624.276	579.422	0.183444	0.10757	0.736497
Q9UBP0	Spastin OS=Homo sapiens GN=SPAST PE=1 SV=1	587.292	566.195	603.124	586.742	643.707	625.757	585.537	618.735	0.18374	-0.0795615	0.735796
O00411	DNA-directed RNA polymerase, mitochondrial OS=Homo sapiens GN=POLRMT PE=1 SV=2	640.416	618.735	660.462	523.58	510.383	641.738	639.871	558.567	0.183972	0.196051	0.735249
B2RTY4	Unconventional myosin-IXa OS=Homo sapiens GN=MYO9A PE=1 SV=2	504.861	570.708	600.41	558.953	692.057	674.577	558.66	641.862	0.183978	-0.200293	0.735235
Q14684	Ribosomal RNA processing protein 1 homolog B OS=Homo sapiens GN=RRP1B PE=1 SV=3	688.439	664.51	734.325	623.422	319.51	582.986	695.758	508.64	0.183991	0.451942	0.735203
Q8NBI5	Solute carrier family 43 member 3 OS=Homo sapiens GN=SLC43A3 PE=1 SV=2	1024.85	638.15	603.181	703.883	301.424	380.542	755.393	461.95	0.184273	0.709493	0.734538
Q9NYU1	UDP-glucose:glycoprotein glucosyltransferase 2 OS=Homo sapiens GN=UGGT2 PE=1 SV=4	656.954	774.271	546.058	517.649	548.401	520.497	659.094	528.849	0.184306	0.317629	0.73446
P52333	Tyrosine-protein kinase JAK3 OS=Homo sapiens GN=JAK3 PE=1 SV=2	442.48	558.406	534.081	541.712	852.433	663.754	511.656	685.967	0.184389	-0.422965	0.734265
Q8N129	Protein canopy homolog 4 OS=Homo sapiens GN=CNPY4 PE=2 SV=1	545.524	532.566	532.16	651.391	798.513	565.556	536.75	671.82	0.184975	-0.323824	0.732886
P11802	Cyclin-dependent kinase 4 OS=Homo sapiens GN=CDK4 PE=1 SV=2	624.21	611.617	764.861	595.617	408.884	604.741	666.896	536.414	0.185128	0.314114	0.732528
F5H6I6	Cullin-associated NEDD8-dissociated protein 1 (Fragment) OS=Homo sapiens GN=CAND1 PE=1 SV=1	442.981	433.086	507.403	607.409	1036.92	594.671	461.156	746.333	0.18604	-0.694564	0.730394
Q96G25	Mediator of RNA polymerase II transcription subunit 8 OS=Homo sapiens GN=MED8 PE=1 SV=2	941.805	662.137	542.992	567.771	453.864	443.616	715.645	488.417	0.186358	0.55113	0.729651
Q9UH92	Max-like protein X OS=Homo sapiens GN=MLX PE=1 SV=2	445.488	626.258	508.31	544.289	785.892	674.417	526.685	668.199	0.1868	-0.343338	0.728624
Q9BT30	Alpha-ketoglutarate-dependent dioxygenase alkB homolog 7, mitochondrial OS=Homo sapiens GN=ALKBH7 PE=1 SV=1	451.111	571.175	458.385	534.237	907.993	667.354	493.557	703.195	0.186845	-0.510707	0.728518
Q14195	Dihydropyrimidinase-related protein 3 OS=Homo sapiens GN=DPYSL3 PE=1 SV=1	518.952	534.038	596.738	551.467	733.84	671.033	549.909	652.113	0.187036	-0.245929	0.728076
Q9BX95	Sphingosine-1-phosphate phosphatase 1 OS=Homo sapiens GN=SGPP1 PE=1 SV=2	587.033	561.824	587.816	599.162	605.649	678.919	578.891	627.91	0.187313	-0.117266	0.727432
Q8NDT2	Putative RNA-binding protein 15B OS=Homo sapiens GN=RBM15B PE=1 SV=3	672.63	493.556	483.385	731.743	693.75	589.238	549.857	671.577	0.187591	-0.288497	0.726787
Q6ULP2	Aftiphilin OS=Homo sapiens GN=AFTPH PE=1 SV=2	763.365	632.832	650.492	684.745	417.472	483.531	682.23	528.583	0.187881	0.368129	0.726116
P62310	U6 snRNA-associated Sm-like protein LSm3 OS=Homo sapiens GN=LSM3 PE=1 SV=2	568.985	628.771	468.505	701.376	685.615	573.47	555.42	653.487	0.188766	-0.234579	0.724077
K7ELX0	Centrosomal protein of 192 kDa (Fragment) OS=Homo sapiens GN=CEP192 PE=1 SV=6	604.709	658.832	795.509	549.113	339.44	645.115	686.35	511.222	0.189009	0.424994	0.723518
F5H070	Lysine-specific demethylase 3A OS=Homo sapiens GN=KDM3A PE=1 SV=2	502.335	631.973	516.324	587.822	739.275	617.733	550.21	648.277	0.189343	-0.236627	0.722752
Q8NE62	Choline dehydrogenase, mitochondrial OS=Homo sapiens GN=CHDH PE=1 SV=2	737.825	574.574	672.768	630.055	448.242	567.842	661.722	548.713	0.189587	0.270175	0.722191
Q96MG7	Melanoma-associated antigen G1 OS=Homo sapiens GN=NDNL2 PE=1 SV=1	483.19	628.161	573.041	649.416	623.124	655.315	561.464	642.618	0.189695	-0.194768	0.721944
Q9H2J4	Phosducin-like protein 3 OS=Homo sapiens GN=PDCL3 PE=1 SV=1	526.143	487.618	537.974	772.326	515.029	841.539	517.245	709.631	0.189932	-0.456222	0.721403
P16591	Tyrosine-protein kinase Fer OS=Homo sapiens GN=FER PE=1 SV=2	647.09	635.558	635.093	586.894	486.774	615.83	639.247	563.166	0.189958	0.182814	0.721343
A0A087X0W9	OTU domain containing 6B, isoform CRA_b OS=Homo sapiens GN=OTUD6B PE=1 SV=1	649.136	586.874	624.645	603.821	565.489	586.638	620.218	585.316	0.190091	0.0835595	0.721038
Q12972	Nuclear inhibitor of protein phosphatase 1 OS=Homo sapiens GN=PPP1R8 PE=1 SV=2	790.924	607	723.44	668.777	306.625	542.139	707.121	505.847	0.190321	0.483256	0.720514
Q8NC60	Nitric oxide-associated protein 1 OS=Homo sapiens GN=NOA1 PE=1 SV=2	613.402	582.899	544.45	644.456	655.506	583.196	580.25	627.72	0.190474	-0.113445	0.720165
P22033	Methylmalonyl-CoA mutase, mitochondrial OS=Homo sapiens GN=MUT PE=1 SV=4	539.959	587.624	565.232	596.073	715.304	601.916	564.271	637.764	0.190523	-0.176634	0.720053
P16435	NADPH--cytochrome P450 reductase OS=Homo sapiens GN=POR PE=1 SV=2	697.116	611.581	664.481	620.518	436.14	591.866	657.726	549.508	0.190588	0.259346	0.719905
A1XBS5	Protein FAM92A1 OS=Homo sapiens GN=FAM92A1 PE=1 SV=2	432.189	509.257	615.563	539.371	828.942	673.9	519.003	680.738	0.190756	-0.391357	0.719522
Q9NQS3	Nectin-3 OS=Homo sapiens GN=PVRL3 PE=1 SV=1	645.967	495.431	554.647	699.198	668.16	590.216	565.348	652.525	0.190803	-0.206892	0.719415
P30305	M-phase inducer phosphatase 2 OS=Homo sapiens GN=CDC25B PE=1 SV=2	529.449	583.541	451.458	636.967	848.535	563.232	521.482	682.911	0.190848	-0.38908	0.719312
Q15427	Splicing factor 3B subunit 4 OS=Homo sapiens GN=SF3B4 PE=1 SV=1	572.108	624.209	534.654	608.98	631.408	638.104	576.991	626.164	0.19087	-0.117993	0.719262
A0A096LPC5	WASH complex subunit FAM21C OS=Homo sapiens GN=FAM21C PE=1 SV=1	725.605	586.444	633.659	605.136	591.404	473.21	648.569	556.583	0.191034	0.220663	0.71889
Q9P2D6	Protein FAM135A OS=Homo sapiens GN=FAM135A PE=1 SV=2	521.122	554.961	553.683	572.55	773.976	629.106	543.255	658.544	0.191148	-0.27765	0.71863
Q96TC7	Regulator of microtubule dynamics protein 3 OS=Homo sapiens GN=RMDN3 PE=1 SV=2	625.704	585.367	482.936	686.131	586.148	675.457	564.669	649.245	0.191575	-0.201358	0.717662
Q9BSE4	Homocysteine-responsive endoplasmic reticulum-resident ubiquitin-like domain member 2 protein OS=Homo sapiens GN=HERPUD2 PE=1 SV=2	415.483	572.274	540.651	522.252	845.178	689.691	509.469	685.707	0.191697	-0.428597	0.717384
P11216	Glycogen phosphorylase, brain form OS=Homo sapiens GN=PYGB PE=1 SV=5	628.988	557.662	529.597	635.656	687.653	587.579	572.082	636.963	0.191792	-0.154986	0.717169
Q9P0L0	Vesicle-associated membrane protein-associated protein A OS=Homo sapiens GN=VAPA PE=1 SV=3	711.903	574.268	634.187	583.387	574.212	537.377	640.119	564.992	0.191895	0.18011	0.716937
A0A0C4DFX9	Negative elongation factor A OS=Homo sapiens GN=NELFA PE=1 SV=1	529.823	537.317	483.914	648.654	864.022	558.776	517.018	690.484	0.19217	-0.417394	0.716315
A4D1E9	GTP-binding protein 10 OS=Homo sapiens GN=GTPBP10 PE=1 SV=1	502.161	639.411	522.184	579.74	707.454	643.268	554.585	643.487	0.192223	-0.214503	0.716194
O94915	Protein furry homolog-like OS=Homo sapiens GN=FRYL PE=1 SV=2	519.978	592.467	549.173	634.12	744.813	570.192	553.873	649.708	0.192321	-0.230238	0.715974
Q96H79	Zinc finger CCCH-type antiviral protein 1-like OS=Homo sapiens GN=ZC3HAV1L PE=1 SV=2	839.879	536.242	699.47	639.859	467.324	457.495	691.864	521.559	0.192739	0.407656	0.71503
Q9NV31	U3 small nucleolar ribonucleoprotein protein IMP3 OS=Homo sapiens GN=IMP3 PE=1 SV=1	523.801	596.91	583.207	568.09	650.438	679.609	567.973	632.712	0.192862	-0.155728	0.714752
Q7Z392	Trafficking protein particle complex subunit 11 OS=Homo sapiens GN=TRAPPC11 PE=1 SV=2	417.571	595.149	583.944	544.03	698.313	753.351	532.221	665.231	0.193123	-0.321829	0.714166
Q9UK45	U6 snRNA-associated Sm-like protein LSm7 OS=Homo sapiens GN=LSM7 PE=1 SV=1	780.478	652.263	556.19	585.033	572.983	457.712	662.977	538.576	0.193184	0.299809	0.71403
Q9UMX1	Suppressor of fused homolog OS=Homo sapiens GN=SUFU PE=1 SV=2	618.239	607.997	763.59	550.005	423.28	637.968	663.275	537.084	0.193198	0.304459	0.713997
Q9Y2R4	Probable ATP-dependent RNA helicase DDX52 OS=Homo sapiens GN=DDX52 PE=1 SV=3	837.343	576.975	877.159	610.635	116.252	620.193	763.826	449.027	0.193564	0.766442	0.713175
O00444	Serine/threonine-protein kinase PLK4 OS=Homo sapiens GN=PLK4 PE=1 SV=3	427.018	954.221	786.002	263.934	584.684	431.865	722.414	426.828	0.193619	0.759171	0.713051
Q9NRN9	Methyltransferase-like protein 5 OS=Homo sapiens GN=METTL5 PE=1 SV=1	534.928	614.64	445.861	648.358	807.942	559.975	531.81	672.092	0.193828	-0.337749	0.712584
P60981	Destrin OS=Homo sapiens GN=DSTN PE=1 SV=3	626.855	623.166	683.25	578.669	468.56	625.376	644.423	557.535	0.193952	0.208947	0.712306
Q9UGU0	Transcription factor 20 OS=Homo sapiens GN=TCF20 PE=1 SV=3	598.758	724.333	610.787	488.126	645.216	489.108	644.626	540.817	0.194351	0.253323	0.711414
Q96C90	Protein phosphatase 1 regulatory subunit 14B OS=Homo sapiens GN=PPP1R14B PE=1 SV=3	533.644	611.975	483.765	589.269	776.265	605.75	543.128	657.095	0.194621	-0.274809	0.710809
P60174	Triosephosphate isomerase OS=Homo sapiens GN=TPI1 PE=1 SV=3	622.649	612.329	652.623	599.9	605.478	511.044	629.2	572.14	0.19471	0.13715	0.710613
Q9HAN9	Nicotinamide/nicotinic acid mononucleotide adenylyltransferase 1 OS=Homo sapiens GN=NMNAT1 PE=1 SV=1	586.79	558.681	595.236	579.909	632.988	661.17	580.236	624.689	0.194772	-0.106499	0.710472
A4D161	Protein FAM221A OS=Homo sapiens GN=FAM221A PE=2 SV=1	568.739	630.029	893.663	560.991	349.651	589.448	697.477	500.03	0.19479	0.480132	0.710433
E9PLT0	Cold shock domain-containing protein E1 OS=Homo sapiens GN=CSDE1 PE=1 SV=1	787.695	608.559	586.439	557.002	568.057	500.062	660.898	541.707	0.194821	0.286914	0.710364
Q15723	ETS-related transcription factor Elf-2 OS=Homo sapiens GN=ELF2 PE=1 SV=2	509.713	578.322	578.692	555.782	659.875	721.137	555.576	645.598	0.195105	-0.216652	0.709731
Q8TF42	Ubiquitin-associated and SH3 domain-containing protein B OS=Homo sapiens GN=UBASH3B PE=1 SV=2	603.345	630.468	706.106	580.677	460.551	621.794	646.64	554.341	0.195242	0.222189	0.709428
Q06546	GA-binding protein alpha chain OS=Homo sapiens GN=GABPA PE=1 SV=1	566.411	636.767	695.827	544.569	543.454	601.313	633.002	563.112	0.195419	0.168788	0.709033
Q9Y5B6	PAX3- and PAX7-binding protein 1 OS=Homo sapiens GN=PAXBP1 PE=1 SV=2	450.375	641.32	544.022	575.951	677.142	704.03	545.239	652.374	0.195548	-0.258811	0.708747
Q969P6	DNA topoisomerase I, mitochondrial OS=Homo sapiens GN=TOP1MT PE=1 SV=1	829.734	623.657	677.39	659.916	289.606	558.657	710.26	502.727	0.19561	0.498574	0.708608
A0A087X1N8	Serpin B6 OS=Homo sapiens GN=SERPINB6 PE=1 SV=1	557.979	611.609	488.891	613.332	748.124	587.555	552.826	649.67	0.195899	-0.232881	0.707968
Q92759	General transcription factor IIH subunit 4 OS=Homo sapiens GN=GTF2H4 PE=2 SV=1	480.504	621.499	531.18	630.879	574.742	778.644	544.394	661.422	0.196014	-0.280919	0.707712
O15118	Niemann-Pick C1 protein OS=Homo sapiens GN=NPC1 PE=1 SV=2	727.598	599.26	703.708	569.305	375.476	641.788	676.855	528.856	0.196157	0.355971	0.707397
Q9BXT8	RING finger protein 17 OS=Homo sapiens GN=RNF17 PE=1 SV=3	863.902	567.426	845.875	607.207	132.508	624.911	759.068	454.876	0.196239	0.738756	0.707214
Q5VTE6	Protein angel homolog 2 OS=Homo sapiens GN=ANGEL2 PE=2 SV=1	627.65	575.041	702.427	546.918	546.759	604.814	635.039	566.164	0.196683	0.165627	0.706233
Q9GZP9	Derlin-2 OS=Homo sapiens GN=DERL2 PE=1 SV=1	499.611	637.355	506.17	564.525	730.694	652.895	547.712	649.371	0.197023	-0.245626	0.705484
Q14146	Unhealthy ribosome biogenesis protein 2 homolog OS=Homo sapiens GN=URB2 PE=2 SV=2	576.642	835.903	589.708	473.846	565.952	492.766	667.417	510.855	0.197078	0.385676	0.705362
P23381	Tryptophan--tRNA ligase, cytoplasmic OS=Homo sapiens GN=WARS PE=1 SV=2	647.419	573.635	667.967	608.014	559.832	560.613	629.674	576.153	0.197201	0.128153	0.705091
Q5BJD5	Transmembrane protein 41B OS=Homo sapiens GN=TMEM41B PE=1 SV=1	969.533	531.499	843.474	657.921	95.4518	566.845	781.502	440.073	0.197288	0.828508	0.7049
Q9NZC3	Glycerophosphodiester phosphodiesterase 1 OS=Homo sapiens GN=GDE1 PE=1 SV=1	491.337	570.323	430.299	599.871	927.182	585.184	497.32	704.079	0.197288	-0.501564	0.704899
Q9BW92	Threonine--tRNA ligase, mitochondrial OS=Homo sapiens GN=TARS2 PE=1 SV=1	529.632	625.021	546.729	572.121	655.166	670.133	567.127	632.473	0.197601	-0.157332	0.70421
Q53R41	FAST kinase domain-containing protein 1 OS=Homo sapiens GN=FASTKD1 PE=1 SV=1	613.687	597.938	518.705	641.353	616.428	636.798	576.777	631.526	0.197952	-0.130829	0.70344
O95801	Tetratricopeptide repeat protein 4 OS=Homo sapiens GN=TTC4 PE=1 SV=3	599.902	639.61	663.456	547.303	635.303	498.514	634.323	560.373	0.197998	0.178829	0.703338
Q8TA86	Retinitis pigmentosa 9 protein OS=Homo sapiens GN=RP9 PE=1 SV=2	555.668	757.409	631.569	523.848	512.028	582.819	648.215	539.565	0.198065	0.264676	0.703192
J3KMZ9	Low-density lipoprotein receptor (Fragment) OS=Homo sapiens GN=LDLR PE=1 SV=1	580.785	624.904	508.959	628.057	615.962	657.634	571.549	633.884	0.198475	-0.149342	0.702295
K7ELP0	Tropomyosin alpha-4 chain (Fragment) OS=Homo sapiens GN=TPM4 PE=1 SV=1	566.994	713.745	752.913	424.941	407.102	688.134	677.884	506.726	0.198618	0.419834	0.70198
Q9H3P7	Golgi resident protein GCP60 OS=Homo sapiens GN=ACBD3 PE=1 SV=4	595.967	663.661	605.522	537.551	618.301	561.465	621.717	572.439	0.198945	0.119135	0.701267
P49137	MAP kinase-activated protein kinase 2 OS=Homo sapiens GN=MAPKAPK2 PE=1 SV=1	562.435	605.356	590.934	605.206	598.489	648.731	586.241	617.475	0.199839	-0.0748868	0.69932
Q07864	DNA polymerase epsilon catalytic subunit A OS=Homo sapiens GN=POLE PE=1 SV=5	570.575	609.291	517.21	605.055	710.248	595.033	565.692	636.779	0.200035	-0.170776	0.698894
Q8WWH5	Probable tRNA pseudouridine synthase 1 OS=Homo sapiens GN=TRUB1 PE=1 SV=1	639.165	550.674	534.006	639.226	668.265	599.468	574.615	635.653	0.200215	-0.145644	0.698503
Q641Q2	WASH complex subunit FAM21A OS=Homo sapiens GN=FAM21A PE=1 SV=3	774.524	584.825	627.419	625.1	556.81	454.949	662.256	545.62	0.200274	0.279493	0.698376
F5H527	Protein phosphatase Slingshot homolog 2 OS=Homo sapiens GN=SSH2 PE=1 SV=1	605.921	654.527	693.903	583.947	439.03	623.251	651.45	548.743	0.200383	0.247526	0.698139
Q9Y6V0	Protein piccolo OS=Homo sapiens GN=PCLO PE=1 SV=4	506.23	717.483	773.14	448.605	516.574	584.118	665.617	516.432	0.200583	0.366114	0.697706
O95340	Bifunctional 3'-phosphoadenosine 5'-phosphosulfate synthase 2 OS=Homo sapiens GN=PAPSS2 PE=1 SV=2	636.804	555.193	547.765	659.512	616.141	621.102	579.921	632.251	0.200629	-0.124643	0.697607
Q06481	Amyloid-like protein 2 OS=Homo sapiens GN=APLP2 PE=1 SV=2	571.462	712.75	621.218	576.211	591.357	505.591	635.143	557.72	0.202254	0.187542	0.694104
Q13107	Ubiquitin carboxyl-terminal hydrolase 4 OS=Homo sapiens GN=USP4 PE=1 SV=3	678.953	600.384	618.573	623.967	522.066	577.654	632.636	574.562	0.202747	0.138914	0.693046
Q13454	Tumor suppressor candidate 3 OS=Homo sapiens GN=TUSC3 PE=1 SV=1	654.863	320.719	532.912	881.228	497.945	856.797	502.831	745.323	0.202834	-0.567792	0.692859
E7EQ45	AP-5 complex subunit mu-1 OS=Homo sapiens GN=AP5M1 PE=1 SV=1	535.483	636.965	450.631	576.503	761.908	634.676	541.026	657.696	0.203366	-0.281721	0.691721
P31150	Rab GDP dissociation inhibitor alpha OS=Homo sapiens GN=GDI1 PE=1 SV=2	551.388	605.321	579.671	585.01	664.35	617.15	578.793	622.17	0.203519	-0.104261	0.691396
P30050	60S ribosomal protein L12 OS=Homo sapiens GN=RPL12 PE=1 SV=1	794.864	597.999	597.538	604.064	508.578	520.036	663.467	544.226	0.203792	0.28582	0.690813
Q96A26	Protein FAM162A OS=Homo sapiens GN=FAM162A PE=1 SV=2	557.386	604.759	481.487	646.946	763.926	560.264	547.878	657.045	0.203843	-0.262139	0.690704
P08651	Nuclear factor 1 C-type OS=Homo sapiens GN=NFIC PE=1 SV=2	742.728	545.212	685.183	604.811	514.706	534.716	657.708	551.411	0.204395	0.254319	0.68953
E7ETU7	39S ribosomal protein L3, mitochondrial OS=Homo sapiens GN=MRPL3 PE=1 SV=1	895.202	585.685	663.813	673.093	310.827	522.298	714.9	502.073	0.204828	0.509845	0.68861
O43482	Protein Mis18-beta OS=Homo sapiens GN=OIP5 PE=1 SV=2	490.961	583.877	550.25	548.771	768.585	651.843	541.696	656.4	0.205009	-0.277092	0.688228
O95140	Mitofusin-2 OS=Homo sapiens GN=MFN2 PE=1 SV=3	644.822	548.656	509.045	645.011	690.795	594.353	567.507	643.386	0.205107	-0.181046	0.688019
P49756	RNA-binding protein 25 OS=Homo sapiens GN=RBM25 PE=1 SV=3	604.661	557.212	606.671	626.804	610.57	619.171	589.515	618.848	0.205138	-0.0700574	0.687954
Q16134	Electron transfer flavoprotein-ubiquinone oxidoreductase, mitochondrial OS=Homo sapiens GN=ETFDH PE=1 SV=2	514.599	546.402	571.183	534.216	733.942	701.519	544.061	656.559	0.205316	-0.271156	0.687577
O14773	Tripeptidyl-peptidase 1 OS=Homo sapiens GN=TPP1 PE=1 SV=2	524.384	583.221	601.69	566.471	663.332	663.406	569.765	631.07	0.20552	-0.147432	0.687145
O14924	Regulator of G-protein signaling 12 OS=Homo sapiens GN=RGS12 PE=1 SV=1	634.651	485.451	494.234	645.507	814.19	564.986	538.112	674.894	0.205552	-0.326756	0.687078
Q9UL63	Muskelin OS=Homo sapiens GN=MKLN1 PE=1 SV=2	540.552	582.978	568.328	591.023	719.462	603.349	563.953	637.944	0.205923	-0.177857	0.686295
Q9Y4C4	Malignant fibrous histiocytoma-amplified sequence 1 OS=Homo sapiens GN=MFHAS1 PE=1 SV=2	545.909	475.054	472.764	706.94	520.711	955.016	497.909	727.556	0.206186	-0.547175	0.685741
Q8N531	F-box/LRR-repeat protein 6 OS=Homo sapiens GN=FBXL6 PE=2 SV=1	409.777	588.102	559.755	531.716	822.584	671.789	519.211	675.363	0.206286	-0.379342	0.685531
O95900	Probable tRNA pseudouridine synthase 2 OS=Homo sapiens GN=TRUB2 PE=1 SV=1	582.911	662.268	631.407	513.065	572.622	617.235	625.528	567.641	0.207067	0.140097	0.683889
Q96DX4	RING finger and SPRY domain-containing protein 1 OS=Homo sapiens GN=RSPRY1 PE=1 SV=1	527.79	616.892	541.194	592.107	719.303	602.556	561.959	637.989	0.207323	-0.183067	0.683353
Q9NVP1	ATP-dependent RNA helicase DDX18 OS=Homo sapiens GN=DDX18 PE=1 SV=2	615.996	632.165	593.953	609.597	566.462	590.631	614.038	588.897	0.207346	0.0603141	0.683305
Q9H6S0	Probable ATP-dependent RNA helicase YTHDC2 OS=Homo sapiens GN=YTHDC2 PE=1 SV=2	546.394	582.993	542.788	557.901	722.137	649.172	557.392	643.07	0.20765	-0.206283	0.682669
O75746	Calcium-binding mitochondrial carrier protein Aralar1 OS=Homo sapiens GN=SLC25A12 PE=1 SV=2	544.334	628.794	556.299	594.063	639.191	640.093	576.476	624.449	0.207711	-0.115324	0.68254
O00192	Armadillo repeat protein deleted in velo-cardio-facial syndrome OS=Homo sapiens GN=ARVCF PE=1 SV=1	461.249	546.057	633.981	553.727	689.036	719.199	547.096	653.987	0.207932	-0.25747	0.68208
Q9BV81	ER membrane protein complex subunit 6 OS=Homo sapiens GN=EMC6 PE=1 SV=1	601.019	383.347	636.861	682.154	649.375	718.335	540.409	683.288	0.208097	-0.338442	0.681734
Q9UNQ0	ATP-binding cassette sub-family G member 2 OS=Homo sapiens GN=ABCG2 PE=1 SV=3	541.031	649.464	489.544	657.824	661.456	614.078	560.013	644.453	0.208492	-0.202613	0.68091
O00154	Cytosolic acyl coenzyme A thioester hydrolase OS=Homo sapiens GN=ACOT7 PE=1 SV=3	621.276	539.67	572.647	688.225	580.023	644.346	577.864	637.532	0.209331	-0.141766	0.679166
Q9H4A5	Golgi phosphoprotein 3-like OS=Homo sapiens GN=GOLPH3L PE=1 SV=1	609.997	627.395	666.966	496.532	544.241	639.36	634.786	560.044	0.209727	0.180729	0.678345
Q96MW5	Conserved oligomeric Golgi complex subunit 8 OS=Homo sapiens GN=COG8 PE=1 SV=2	607.177	590.144	691.35	603.251	566.165	551.558	629.557	573.658	0.20984	0.134146	0.678111
P30260	Cell division cycle protein 27 homolog OS=Homo sapiens GN=CDC27 PE=1 SV=2	832.851	576.506	748.459	661.179	257.368	570.901	719.272	496.483	0.210066	0.534794	0.677645
G5EA36	Cell division cycle 27, isoform CRA_c OS=Homo sapiens GN=CDC27 PE=1 SV=1	825.356	580.078	744.375	659.955	263.817	572.302	716.603	498.691	0.210185	0.523027	0.677397
Q8N5A5	Zinc finger CCCH-type with G patch domain-containing protein OS=Homo sapiens GN=ZGPAT PE=1 SV=3	769.204	589.999	630.601	628.158	440.536	573.299	663.268	547.331	0.210236	0.277178	0.677293
Q5JSJ4	Protein DDX26B OS=Homo sapiens GN=DDX26B PE=1 SV=1	526.554	574.209	618.214	595.014	610.788	688.08	572.992	631.294	0.210503	-0.139797	0.676741
F8W7C6	60S ribosomal protein L10 OS=Homo sapiens GN=RPL10 PE=1 SV=2	581.457	608.655	718.124	516.297	554.069	608.703	636.079	559.69	0.210632	0.184578	0.676477
Q8TE77	Protein phosphatase Slingshot homolog 3 OS=Homo sapiens GN=SSH3 PE=1 SV=2	513.91	570.287	603.276	556.389	691.242	666.066	562.491	637.899	0.211032	-0.181499	0.675651
P28482	Mitogen-activated protein kinase 1 OS=Homo sapiens GN=MAPK1 PE=1 SV=3	618.231	656.115	640.719	557.533	635.189	476.449	638.355	556.39	0.211062	0.198262	0.67559
Q9NQ89	Protein C12orf4 OS=Homo sapiens GN=C12orf4 PE=2 SV=1	645.543	509.699	563.537	678.185	636.426	614.685	572.926	643.099	0.211209	-0.16669	0.675287
C9JXG8	Ran-specific GTPase-activating protein (Fragment) OS=Homo sapiens GN=RANBP1 PE=1 SV=2	570.886	669.648	694.738	436.848	637.119	543.851	645.091	539.273	0.211654	0.258487	0.674374
Q9NX58	Cell growth-regulating nucleolar protein OS=Homo sapiens GN=LYAR PE=1 SV=2	562.53	704.241	675.587	511.014	470.676	649.309	647.453	543.666	0.211716	0.252054	0.674247
A8MYK1	39S ribosomal protein L23, mitochondrial OS=Homo sapiens GN=MRPL23 PE=1 SV=1	580.023	577.536	502.079	584.179	757.658	607.152	553.213	649.663	0.211913	-0.231857	0.673843
Q9P031	Thyroid transcription factor 1-associated protein 26 OS=Homo sapiens GN=CCDC59 PE=1 SV=2	491.445	587.535	586.337	561.972	729.399	639.427	555.106	643.6	0.212027	-0.213401	0.673609
Q6AI12	Ankyrin repeat domain-containing protein 40 OS=Homo sapiens GN=ANKRD40 PE=1 SV=2	719.798	657.831	776.015	641.6	234.276	592.574	717.881	489.483	0.212042	0.552486	0.673578
Q99442	Translocation protein SEC62 OS=Homo sapiens GN=SEC62 PE=1 SV=1	717.724	562.805	852.292	597.765	271.15	625.557	710.941	498.157	0.2125	0.513128	0.67264
D6RF35	Vitamin D-binding protein OS=Homo sapiens GN=GC PE=1 SV=1	187.652	1082.37	1369.16	182.945	87.5321	481.132	879.729	250.536	0.212511	1.81204	0.672618
Q52LR7	Enhancer of polycomb homolog 2 OS=Homo sapiens GN=EPC2 PE=1 SV=2	586.015	613.224	545.777	629.966	652.991	585.678	581.672	622.878	0.212681	-0.0987454	0.672271
A0A087WU53	Magnesium transporter protein 1 OS=Homo sapiens GN=MAGT1 PE=1 SV=1	466.677	629.606	567.986	600.334	614.842	724.014	554.756	646.397	0.212912	-0.220566	0.6718
Q8NDZ4	Deleted in autism protein 1 OS=Homo sapiens GN=C3orf58 PE=1 SV=1	488.973	539.776	539.063	872.452	704.657	526.558	522.604	701.222	0.213044	-0.424153	0.67153
Q6ICL3	Transport and Golgi organization protein 2 homolog OS=Homo sapiens GN=TANGO2 PE=2 SV=1	584.495	563.868	547.551	747.968	612.005	594.689	565.304	651.554	0.213163	-0.204857	0.671289
Q8IZH2	5'-3' exoribonuclease 1 OS=Homo sapiens GN=XRN1 PE=1 SV=1	704.216	582.583	624.891	620.81	533.59	558.128	637.23	570.843	0.213225	0.158721	0.671162
Q16643	Drebrin OS=Homo sapiens GN=DBN1 PE=1 SV=4	656.435	604.21	602.853	610.786	591.153	548.217	621.166	583.385	0.213354	0.0905287	0.670898
Q9BVM2	Protein DPCD OS=Homo sapiens GN=DPCD PE=1 SV=2	461.431	498.624	595.026	709.204	517.569	878.473	518.36	701.749	0.213732	-0.436999	0.670131
Q6IBW4	Condensin-2 complex subunit H2 OS=Homo sapiens GN=NCAPH2 PE=1 SV=1	543.697	651.945	761.487	495.227	502.573	618.143	652.376	538.647	0.213765	0.276363	0.670064
Q9BY71	Leucine-rich repeat-containing protein 3 OS=Homo sapiens GN=LRRC3 PE=1 SV=1	429.921	633.305	425.9	675.704	919.516	519.152	496.375	704.791	0.214138	-0.505764	0.669306
P35659	Protein DEK OS=Homo sapiens GN=DEK PE=1 SV=1	674.476	584.699	619.976	584.11	546.485	605.954	626.384	578.85	0.214493	0.113858	0.668587
Q6P2Q9	Pre-mRNA-processing-splicing factor 8 OS=Homo sapiens GN=PRPF8 PE=1 SV=2	594.846	591.615	559.047	671.81	579.849	634.31	581.836	628.657	0.21488	-0.11166	0.667803
Q9HBE1	POZ-, AT hook-, and zinc finger-containing protein 1 OS=Homo sapiens GN=PATZ1 PE=1 SV=1	473.659	719.865	894.092	344.012	629.211	446.004	695.872	473.076	0.215159	0.556751	0.667241
H0Y8C3	Mitochondrial carrier homolog 1 (Fragment) OS=Homo sapiens GN=MTCH1 PE=1 SV=1	497.804	588.102	521.763	586.529	810.098	595.209	535.89	663.945	0.215266	-0.309128	0.667024
A2RRP1	Neuroblastoma-amplified sequence OS=Homo sapiens GN=NBAS PE=1 SV=2	654.131	666.507	629.763	616.385	443.687	598.928	650.133	553	0.21557	0.233456	0.666411
Q08379	Golgin subfamily A member 2 OS=Homo sapiens GN=GOLGA2 PE=1 SV=3	622.912	540.31	572.16	601.962	677.903	606.922	578.461	628.929	0.215766	-0.120679	0.666016
F6XEV2	Calcium uptake protein 1, mitochondrial OS=Homo sapiens GN=MICU1 PE=1 SV=2	671.253	483.926	492.692	797.624	650.821	585.266	549.29	677.904	0.215845	-0.303511	0.665859
P33552	Cyclin-dependent kinases regulatory subunit 2 OS=Homo sapiens GN=CKS2 PE=1 SV=1	869.13	707.205	580.133	632.14	237.867	600	718.823	490.002	0.216164	0.552847	0.665216
Q5TGZ0	MICOS complex subunit MIC10 OS=Homo sapiens GN=MINOS1 PE=1 SV=1	859.116	735.032	678.857	773.344	181.814	414.646	757.668	456.601	0.216315	0.730631	0.664912
O94766	Galactosylgalactosylxylosylprotein 3-beta-glucuronosyltransferase 3 OS=Homo sapiens GN=B3GAT3 PE=1 SV=2	507.63	593.95	594.194	677.628	687.839	558.019	565.258	641.162	0.217047	-0.181779	0.663446
Q6ZRI6	Uncharacterized protein C15orf39 OS=Homo sapiens GN=C15orf39 PE=1 SV=3	677.356	467.551	489.458	809.541	668.437	574.322	544.789	684.1	0.218132	-0.328511	0.66128
H7C3C4	Anion exchange protein (Fragment) OS=Homo sapiens GN=SLC4A7 PE=1 SV=1	524.734	550.356	444.97	676.004	906.366	521.826	506.687	701.399	0.218185	-0.469141	0.661176
Q7Z7H8	39S ribosomal protein L10, mitochondrial OS=Homo sapiens GN=MRPL10 PE=1 SV=3	745.021	557.568	653.815	608.16	507.069	556.577	652.135	557.269	0.21844	0.226797	0.660669
Q8WW59	SPRY domain-containing protein 4 OS=Homo sapiens GN=SPRYD4 PE=1 SV=2	594.649	438.75	521.601	911.823	506.636	748.063	518.333	722.174	0.218874	-0.478466	0.659806
Q9H3U1	Protein unc-45 homolog A OS=Homo sapiens GN=UNC45A PE=1 SV=1	614.237	594.488	638.405	570.246	571.649	617.302	615.71	586.399	0.21931	0.0703681	0.658941
P52701	DNA mismatch repair protein Msh6 OS=Homo sapiens GN=MSH6 PE=1 SV=2	674.16	593.543	623.794	603.509	518.049	606.132	630.499	575.897	0.219772	0.130684	0.658027
Q09472	Histone acetyltransferase p300 OS=Homo sapiens GN=EP300 PE=1 SV=2	643.715	699.374	571.967	479.875	640.597	529.361	638.352	549.944	0.219814	0.215067	0.657944
P08069	Insulin-like growth factor 1 receptor OS=Homo sapiens GN=IGF1R PE=1 SV=1	579.862	533.146	617.54	661.711	572.411	674.403	576.849	636.175	0.220043	-0.14123	0.657491
Q15911	Zinc finger homeobox protein 3 OS=Homo sapiens GN=ZFHX3 PE=1 SV=2	588.62	641.577	622.984	569.239	555.347	619.325	617.727	581.304	0.220136	0.0876768	0.657309
P13010	X-ray repair cross-complementing protein 5 OS=Homo sapiens GN=XRCC5 PE=1 SV=3	642.331	527.938	559.184	679.708	637.924	597.139	576.484	638.257	0.220187	-0.146857	0.657208
O15160	DNA-directed RNA polymerases I and III subunit RPAC1 OS=Homo sapiens GN=POLR1C PE=1 SV=1	654.361	491.766	559.041	680.882	603.173	666.726	568.389	650.26	0.220406	-0.194138	0.656777
B1ALY0	Protein PALM2-AKAP2 (Fragment) OS=Homo sapiens GN=PALM2-AKAP2 PE=1 SV=1	661.932	686.004	579.916	554.429	639.002	460.581	642.617	551.337	0.220465	0.221025	0.65666
Q5T653	39S ribosomal protein L2, mitochondrial OS=Homo sapiens GN=MRPL2 PE=1 SV=2	718.677	599.768	635.049	494.917	665.512	471.594	651.164	544.008	0.220653	0.259395	0.65629
Q8N653	Leucine-zipper-like transcriptional regulator 1 OS=Homo sapiens GN=LZTR1 PE=1 SV=2	594.512	608.157	535.619	634.11	661.048	582.5	579.429	625.886	0.220729	-0.111267	0.656141
Q9UJ70	N-acetyl-D-glucosamine kinase OS=Homo sapiens GN=NAGK PE=1 SV=4	614.084	546.449	591.228	643.314	583.187	656.024	583.921	627.508	0.22074	-0.103862	0.65612
D3DQV9	Eukaryotic translation initiation factor 4 gamma 2 (Fragment) OS=Homo sapiens GN=EIF4G2 PE=1 SV=1	656.296	606.708	660.498	609.748	475.685	608.42	641.167	564.618	0.22095	0.183427	0.655705
Q92643	GPI-anchor transamidase OS=Homo sapiens GN=PIGK PE=1 SV=2	467.181	624.954	585.329	625.066	601.24	705.133	559.155	643.813	0.221119	-0.203394	0.655374
O43924	Retinal rod rhodopsin-sensitive cGMP 3',5'-cyclic phosphodiesterase subunit delta OS=Homo sapiens GN=PDE6D PE=1 SV=1	485.704	598.715	581.687	572.481	734.925	621.776	555.369	643.061	0.221317	-0.211509	0.654985
Q14469	Transcription factor HES-1 OS=Homo sapiens GN=HES1 PE=1 SV=1	387.689	574.37	335.573	577.27	1147.88	564.671	432.544	763.274	0.22134	-0.819355	0.654941
Q8N201	Integrator complex subunit 1 OS=Homo sapiens GN=INTS1 PE=1 SV=2	552.652	608.498	540.947	622.666	709.219	574.818	567.365	635.568	0.221788	-0.163767	0.654062
Q14258	E3 ubiquitin/ISG15 ligase TRIM25 OS=Homo sapiens GN=TRIM25 PE=1 SV=2	709.42	579.533	722.929	617.516	388.745	609.843	670.627	538.701	0.221922	0.316026	0.653801
O15013	Rho guanine nucleotide exchange factor 10 OS=Homo sapiens GN=ARHGEF10 PE=1 SV=4	456.344	550.395	505.205	510.48	887.626	678.602	503.981	692.236	0.22215	-0.457894	0.653354
Q8TEQ6	Gem-associated protein 5 OS=Homo sapiens GN=GEMIN5 PE=1 SV=3	550.623	705.394	647.467	494.971	566.827	599.262	634.495	553.686	0.222469	0.196539	0.65273
A0A087WT44	Heme oxygenase 2 OS=Homo sapiens GN=HMOX2 PE=1 SV=1	638.443	554.646	533.884	652.859	667.81	584.819	575.658	635.163	0.222816	-0.141915	0.652054
O75037	Kinesin-like protein KIF21B OS=Homo sapiens GN=KIF21B PE=1 SV=2	588.418	472.887	616.339	669.977	562.259	746.037	559.215	659.424	0.222945	-0.237805	0.651802
P02511	Alpha-crystallin B chain OS=Homo sapiens GN=CRYAB PE=1 SV=2	576.156	577.493	589.843	659.27	573.923	653.471	581.164	628.888	0.223048	-0.113857	0.651602
O75113	NEDD4-binding protein 1 OS=Homo sapiens GN=N4BP1 PE=1 SV=4	571.386	671.783	641.156	494.553	587.065	605.724	628.108	562.448	0.223325	0.159295	0.651063
Q01974	Tyrosine-protein kinase transmembrane receptor ROR2 OS=Homo sapiens GN=ROR2 PE=1 SV=2	491.676	538.356	516.914	574.927	881.49	600.39	515.649	685.602	0.224062	-0.410984	0.649631
E9PBE3	Uncharacterized protein OS=Homo sapiens PE=4 SV=1	584.02	563.779	558.128	670.281	558.772	704.349	568.642	644.468	0.224097	-0.180587	0.649564
O00442	RNA 3'-terminal phosphate cyclase OS=Homo sapiens GN=RTCA PE=1 SV=1	541.618	643.587	519.421	617.148	658.376	624.854	568.209	633.46	0.224179	-0.156831	0.649406
Q8N8N7	Prostaglandin reductase 2 OS=Homo sapiens GN=PTGR2 PE=1 SV=1	567.659	644.522	674.47	539.088	537.019	624.952	628.884	567.02	0.224456	0.149394	0.648868
O75818	Ribonuclease P protein subunit p40 OS=Homo sapiens GN=RPP40 PE=1 SV=3	771.317	563.499	839.471	576.625	214.749	663.848	724.762	485.074	0.224659	0.579303	0.648476
Q9Y535	DNA-directed RNA polymerase III subunit RPC8 OS=Homo sapiens GN=POLR3H PE=1 SV=1	456	592.915	549.996	561.218	812.457	617.889	532.97	663.855	0.224693	-0.316813	0.648411
C9JK30	SH3 domain-binding protein 5 (Fragment) OS=Homo sapiens GN=SH3BP5 PE=1 SV=1	545.704	542.755	596.52	556.448	650.195	720.37	561.66	642.338	0.225403	-0.193635	0.64704
O60239	SH3 domain-binding protein 5 OS=Homo sapiens GN=SH3BP5 PE=1 SV=2	545.704	542.755	596.52	556.448	650.195	720.37	561.66	642.338	0.225403	-0.193635	0.64704
Q15738	Sterol-4-alpha-carboxylate 3-dehydrogenase, decarboxylating OS=Homo sapiens GN=NSDHL PE=1 SV=2	565.642	697.69	649.492	520.037	502.953	640.383	637.608	554.458	0.225543	0.201593	0.646771
Q4KMQ2	Anoctamin-6 OS=Homo sapiens GN=ANO6 PE=1 SV=2	664.122	618.197	868.792	601.594	225.023	638.612	717.037	488.41	0.225798	0.553956	0.646281
G5EA03	LIM and calponin homology domains-containing protein 1 OS=Homo sapiens GN=LIMCH1 PE=1 SV=1	620.695	625.857	625.76	631.037	555.012	554.405	624.104	580.152	0.225811	0.105356	0.646255
P40818	Ubiquitin carboxyl-terminal hydrolase 8 OS=Homo sapiens GN=USP8 PE=1 SV=1	642.439	574.933	648.342	584.96	594.537	566.378	621.905	581.958	0.226024	0.0957777	0.645845
Q10713	Mitochondrial-processing peptidase subunit alpha OS=Homo sapiens GN=PMPCA PE=1 SV=2	546.103	554.34	609.409	669.702	558.794	698.377	569.951	642.291	0.226413	-0.17239	0.645099
A8MXP9	Matrin-3 OS=Homo sapiens GN=MATR3 PE=1 SV=1	668.915	569.546	649.302	608.043	570.128	553.553	629.255	577.241	0.226452	0.124469	0.645025
P52732	Kinesin-like protein KIF11 OS=Homo sapiens GN=KIF11 PE=1 SV=2	642.545	494.579	577.355	663.961	651.499	616.697	571.493	644.052	0.226552	-0.172443	0.644831
Q6UWZ7	BRCA1-A complex subunit Abraxas OS=Homo sapiens GN=FAM175A PE=1 SV=2	452.883	633.671	574.154	587.109	666.064	681.373	553.569	644.849	0.226587	-0.220196	0.644765
O95835	Serine/threonine-protein kinase LATS1 OS=Homo sapiens GN=LATS1 PE=1 SV=1	537.723	536.128	568.447	576.201	780.491	610.13	547.433	655.607	0.226858	-0.26015	0.644246
P63000	Ras-related C3 botulinum toxin substrate 1 OS=Homo sapiens GN=RAC1 PE=1 SV=1	551.648	661.773	833.812	296.577	535.125	646.246	682.411	492.649	0.226883	0.470079	0.644198
P56937	3-keto-steroid reductase OS=Homo sapiens GN=HSD17B7 PE=1 SV=1	619.704	614.644	642.173	553.275	537.166	633.913	625.507	574.785	0.227295	0.122004	0.643411
Q92900	Regulator of nonsense transcripts 1 OS=Homo sapiens GN=UPF1 PE=1 SV=2	574.467	599.283	565.954	591.121	671.77	603.766	579.901	622.219	0.227308	-0.101614	0.643385
B0YJ81	Very-long-chain (3R)-3-hydroxyacyl-CoA dehydratase 1 OS=Homo sapiens GN=HACD1 PE=1 SV=1	640.358	499.863	432.529	837.757	770.044	499.711	524.25	702.504	0.227416	-0.422251	0.64318
Q16585	Beta-sarcoglycan OS=Homo sapiens GN=SGCB PE=1 SV=1	436.616	673.567	448.192	575.503	824.84	622.202	519.458	674.182	0.22754	-0.37613	0.642942
P09619	Platelet-derived growth factor receptor beta OS=Homo sapiens GN=PDGFRB PE=1 SV=1	547.087	621.932	519.853	601.739	721.097	590.637	562.957	637.824	0.227595	-0.180133	0.642838
Q969M3	Protein YIPF5 OS=Homo sapiens GN=YIPF5 PE=1 SV=1	1145.94	572.708	646.226	620.182	91.2104	590.629	788.291	434.007	0.227646	0.861008	0.642739
P30291	Wee1-like protein kinase OS=Homo sapiens GN=WEE1 PE=1 SV=2	562.434	397.232	657.262	614.677	620.493	803.029	538.976	679.399	0.227816	-0.33404	0.642416
A0A0C4DGG9	Chromodomain-helicase-DNA-binding protein 4 OS=Homo sapiens GN=CHD4 PE=1 SV=1	598.955	602.179	676.847	576.662	533.128	617.653	625.994	575.815	0.227856	0.120544	0.64234
O75717	WD repeat and HMG-box DNA-binding protein 1 OS=Homo sapiens GN=WDHD1 PE=1 SV=1	660.452	655.075	562.596	561.775	602.061	552.87	626.041	572.236	0.227856	0.129648	0.642339
J3KQ48	Peptidyl-tRNA hydrolase 2, mitochondrial OS=Homo sapiens GN=PTRH2 PE=1 SV=1	456.196	777.562	843.157	402.77	405.823	640.114	692.305	482.903	0.227872	0.519675	0.642309
Q06265	Exosome complex component RRP45 OS=Homo sapiens GN=EXOSC9 PE=1 SV=3	655.239	674.461	683.667	595.332	367.716	628.842	671.122	530.63	0.227974	0.33887	0.642115
Q9Y281	Cofilin-2 OS=Homo sapiens GN=CFL2 PE=1 SV=1	676.455	570.799	669.732	610.898	498.487	597.496	638.995	568.96	0.227976	0.167478	0.642111
Q68D91	Metallo-beta-lactamase domain-containing protein 2 OS=Homo sapiens GN=MBLAC2 PE=1 SV=3	322.875	837.32	1285.27	352.828	151.447	534.864	815.156	346.38	0.228077	1.23472	0.641918
Q8IUI8	Cytokine receptor-like factor 3 OS=Homo sapiens GN=CRLF3 PE=1 SV=2	488.689	480.888	532.332	617.838	943.247	556.274	500.636	705.786	0.22809	-0.495469	0.641893
Q7Z6E9	E3 ubiquitin-protein ligase RBBP6 OS=Homo sapiens GN=RBBP6 PE=1 SV=1	611.871	598.198	658.215	622.32	547.952	576.931	622.761	582.401	0.22837	0.0966663	0.641361
Q86WG5	Myotubularin-related protein 13 OS=Homo sapiens GN=SBF2 PE=1 SV=1	552.573	607.144	595.6	588.178	634	626.699	585.105	616.292	0.228407	-0.0749181	0.641291
Q14674	Separin OS=Homo sapiens GN=ESPL1 PE=1 SV=3	488.745	631.268	531.003	557.658	736.898	643.173	550.339	645.91	0.228602	-0.231013	0.64092
Q9BVT8	Transmembrane and ubiquitin-like domain-containing protein 1 OS=Homo sapiens GN=TMUB1 PE=1 SV=1	599.102	609.747	645.42	555.315	567.312	622.545	618.09	581.724	0.228788	0.087481	0.640566
Q8NB49	Phospholipid-transporting ATPase IG OS=Homo sapiens GN=ATP11C PE=1 SV=3	416.927	641.224	540.223	548.014	668.305	773.361	532.792	663.227	0.22879	-0.315931	0.640564
P48739	Phosphatidylinositol transfer protein beta isoform OS=Homo sapiens GN=PITPNB PE=1 SV=2	588.756	536.361	585.922	710.414	558.821	670.941	570.346	646.725	0.228792	-0.181316	0.64056
B5MCA4	Epithelial cell adhesion molecule OS=Homo sapiens GN=EPCAM PE=1 SV=1	415.134	757.007	1031.01	243.551	417.799	619.41	734.384	426.92	0.228829	0.782569	0.640489
Q02224	Centromere-associated protein E OS=Homo sapiens GN=CENPE PE=1 SV=2	576.517	581.994	507.943	572.764	751.372	614.805	555.485	646.314	0.228903	-0.218487	0.640348
Q969R5	Lethal(3)malignant brain tumor-like protein 2 OS=Homo sapiens GN=L3MBTL2 PE=1 SV=1	552.153	677.47	675.07	518.594	631.809	513.195	634.898	554.533	0.229208	0.195252	0.63977
O75223	Gamma-glutamylcyclotransferase OS=Homo sapiens GN=GGCT PE=1 SV=1	612.001	537.466	603.614	664.815	595.455	625.113	584.36	628.461	0.229291	-0.104966	0.639613
P54198	Protein HIRA OS=Homo sapiens GN=HIRA PE=1 SV=2	601.566	552.808	492.33	625.919	783.066	565.771	548.901	658.252	0.229505	-0.262093	0.639208
U3KQP1	Asparagine synthetase domain-containing protein 1 (Fragment) OS=Homo sapiens GN=ASNSD1 PE=1 SV=1	721.26	579.007	618.182	607.826	546.361	549.798	639.483	567.995	0.229538	0.171028	0.639146
O75534	Cold shock domain-containing protein E1 OS=Homo sapiens GN=CSDE1 PE=1 SV=2	789.489	597.419	586.547	577.184	558.88	505.469	657.818	547.178	0.229799	0.265679	0.638651
Q5HYK3	2-methoxy-6-polyprenyl-1,4-benzoquinol methylase, mitochondrial OS=Homo sapiens GN=COQ5 PE=1 SV=2	627.675	470.2	575.259	674.557	741.064	558.505	557.711	658.042	0.229852	-0.238661	0.638552
O43296	Zinc finger protein 264 OS=Homo sapiens GN=ZNF264 PE=1 SV=1	927.046	612.74	796.88	813.72	134.702	389.644	778.889	446.022	0.230151	0.804301	0.637988
Q9NUP9	Protein lin-7 homolog C OS=Homo sapiens GN=LIN7C PE=1 SV=1	536.83	572.66	548.445	562.995	754.539	626.154	552.645	647.896	0.230352	-0.229409	0.637608
Q15293	Reticulocalbin-1 OS=Homo sapiens GN=RCN1 PE=1 SV=1	725.363	589.894	624.603	646.584	505.653	537.813	646.62	563.35	0.230452	0.198887	0.63742
Q96ES7	SAGA-associated factor 29 homolog OS=Homo sapiens GN=CCDC101 PE=1 SV=1	411.434	581.122	588.22	515.106	780.934	706.468	526.925	667.503	0.231113	-0.341175	0.636176
Q6DKI1	60S ribosomal protein L7-like 1 OS=Homo sapiens GN=RPL7L1 PE=1 SV=1	686.491	477.184	499.281	720.454	689.671	592.25	554.319	667.458	0.231317	-0.267962	0.635792
Q01826	DNA-binding protein SATB1 OS=Homo sapiens GN=SATB1 PE=1 SV=1	521.079	636.832	482.181	602.232	768.748	586.665	546.697	652.548	0.231868	-0.255342	0.634759
P09960	Leukotriene A-4 hydrolase OS=Homo sapiens GN=LTA4H PE=1 SV=2	587.398	654.765	613.464	587.985	547.176	608.094	618.542	581.085	0.231918	0.0901221	0.634666
Q16877	6-phosphofructo-2-kinase/fructose-2,6-bisphosphatase 4 OS=Homo sapiens GN=PFKFB4 PE=2 SV=6	494.228	643.303	552.802	604.018	671.723	632.026	563.444	635.922	0.231938	-0.174577	0.634629
O75663	TIP41-like protein OS=Homo sapiens GN=TIPRL PE=1 SV=2	547.317	608.362	595.843	648.824	630.387	584.754	583.841	621.322	0.23208	-0.0897657	0.634362
Q99766	ATP synthase subunit s, mitochondrial OS=Homo sapiens GN=ATP5S PE=1 SV=3	727.661	241.969	434.799	1184.25	595.417	637.341	468.143	805.669	0.232201	-0.783238	0.634135
A1KZ92	Peroxidasin-like protein OS=Homo sapiens GN=PXDNL PE=1 SV=3	495.258	636.698	542.973	586.683	718.163	613.77	558.31	639.539	0.232229	-0.195967	0.634083
P46199	Translation initiation factor IF-2, mitochondrial OS=Homo sapiens GN=MTIF2 PE=1 SV=2	551.466	618.254	587.697	628.369	611.041	614.717	585.806	618.042	0.23236	-0.0772838	0.633839
O95544	NAD kinase OS=Homo sapiens GN=NADK PE=1 SV=1	662.92	548.029	445.179	655.11	732.131	593.505	552.043	660.249	0.232501	-0.25823	0.633576
Q13303	Voltage-gated potassium channel subunit beta-2 OS=Homo sapiens GN=KCNAB2 PE=1 SV=2	396.588	433.505	671.383	551.44	636.169	940.462	500.492	709.357	0.232555	-0.503165	0.633474
O60664	Perilipin-3 OS=Homo sapiens GN=PLIN3 PE=1 SV=3	734.137	589.739	602.138	606.48	556.349	531.509	642.005	564.779	0.23268	0.184897	0.63324
Q8IZ41	Ras and EF-hand domain-containing protein OS=Homo sapiens GN=RASEF PE=1 SV=1	561.803	585.092	511.34	628.128	764.672	562.477	552.745	651.759	0.232804	-0.237724	0.633009
J3KNS1	Cytosolic carboxypeptidase 1 OS=Homo sapiens GN=AGTPBP1 PE=1 SV=1	777.383	647.039	691.236	568.622	260.87	671.404	705.219	500.299	0.233467	0.495282	0.631774
Q9BZQ6	ER degradation-enhancing alpha-mannosidase-like protein 3 OS=Homo sapiens GN=EDEM3 PE=1 SV=2	562.46	613.982	551.589	629.912	575.156	685.639	576.01	630.236	0.23385	-0.129797	0.631063
Q5HYJ3	Protein FAM76B OS=Homo sapiens GN=FAM76B PE=1 SV=3	607.128	608.785	944.131	569.216	230.646	645.165	720.015	481.676	0.233925	0.579965	0.630923
P21281	V-type proton ATPase subunit B, brain isoform OS=Homo sapiens GN=ATP6V1B2 PE=1 SV=3	644.796	584.28	622.52	577.481	572.772	609.939	617.199	586.731	0.234096	0.0730373	0.630605
O95619	YEATS domain-containing protein 4 OS=Homo sapiens GN=YEATS4 PE=1 SV=1	537.533	506.87	625.837	544.219	712.35	683.998	556.747	646.856	0.234746	-0.216423	0.629402
G3V5R9	Kinesin light chain 1 OS=Homo sapiens GN=KLC1 PE=1 SV=1	613.016	652.607	586.744	605.971	588.497	555.242	617.456	583.237	0.235064	0.0822544	0.628813
Q14147	Probable ATP-dependent RNA helicase DHX34 OS=Homo sapiens GN=DHX34 PE=1 SV=2	543.669	572.63	564.211	600.588	741.408	586.083	560.17	642.693	0.235358	-0.198264	0.628272
O43148	mRNA cap guanine-N7 methyltransferase OS=Homo sapiens GN=RNMT PE=1 SV=1	651.336	506.869	561.651	690.481	629.243	612.288	573.285	644.004	0.235378	-0.167817	0.628234
P25445	Tumor necrosis factor receptor superfamily member 6 OS=Homo sapiens GN=FAS PE=1 SV=1	630.361	574.406	974.949	505.486	230.916	683.003	726.572	473.135	0.23548	0.618854	0.628045
P21397	Amine oxidase [flavin-containing] A OS=Homo sapiens GN=MAOA PE=1 SV=1	546.405	561.977	580.435	642.713	561.904	738.485	562.939	647.701	0.23593	-0.202348	0.627217
Q9BXR0	Queuine tRNA-ribosyltransferase OS=Homo sapiens GN=QTRT1 PE=1 SV=3	508.176	569.226	480.484	560.909	872.856	606.027	519.295	679.931	0.2364	-0.388833	0.626353
Q9H0P0	Cytosolic 5'-nucleotidase 3A OS=Homo sapiens GN=NT5C3A PE=1 SV=3	591.474	615.424	537.755	612.649	655.183	597.946	581.551	621.926	0.237188	-0.0968377	0.624907
Q9BY44	Eukaryotic translation initiation factor 2A OS=Homo sapiens GN=EIF2A PE=1 SV=3	650.249	529.568	530.512	698.549	664.183	574.673	570.11	645.802	0.237566	-0.179852	0.624215
Q9UHC1	DNA mismatch repair protein Mlh3 OS=Homo sapiens GN=MLH3 PE=1 SV=3	505.633	516.484	541.368	899.274	705.663	513.622	521.162	706.186	0.237655	-0.438317	0.624053
P35556	Fibrillin-2 OS=Homo sapiens GN=FBN2 PE=1 SV=3	610.747	564.639	808.407	519.278	484.123	609.864	661.264	537.755	0.237833	0.298277	0.623729
Q6UXH1	Cysteine-rich with EGF-like domain protein 2 OS=Homo sapiens GN=CRELD2 PE=1 SV=1	722.715	608.826	828.198	605.678	207.839	651.635	719.913	488.384	0.237906	0.559807	0.623594
A0A0D9SF53	ATP-dependent RNA helicase DDX3X OS=Homo sapiens GN=DDX3X PE=1 SV=1	691.874	598.289	641.061	637.651	477.008	580.748	643.741	565.136	0.237931	0.187883	0.623549
Q13011	Delta(3,5)-Delta(2,4)-dienoyl-CoA isomerase, mitochondrial OS=Homo sapiens GN=ECH1 PE=1 SV=2	600.951	577.577	779.863	559.357	520.734	562.287	652.797	547.459	0.237955	0.253882	0.623504
Q6WCQ1	Myosin phosphatase Rho-interacting protein OS=Homo sapiens GN=MPRIP PE=1 SV=3	589.196	548.408	622.754	628.666	603.059	634.489	586.786	622.071	0.238266	-0.0842458	0.622938
Q8N3C0	Activating signal cointegrator 1 complex subunit 3 OS=Homo sapiens GN=ASCC3 PE=1 SV=3	572.382	648.66	660.739	574.684	518.976	620.579	627.26	571.413	0.238779	0.13453	0.622004
Q8IWQ3	Serine/threonine-protein kinase BRSK2 OS=Homo sapiens GN=BRSK2 PE=1 SV=3	532.407	790.002	672.807	519.636	397.726	647.587	665.072	521.65	0.238805	0.35043	0.621957
Q96F86	Enhancer of mRNA-decapping protein 3 OS=Homo sapiens GN=EDC3 PE=1 SV=1	907.276	546.51	658.268	659.116	365.443	517.283	704.018	513.947	0.238834	0.453992	0.621905
Q9Y5S9	RNA-binding protein 8A OS=Homo sapiens GN=RBM8A PE=1 SV=1	489.024	809.735	694.199	427.437	535.366	569.129	664.319	510.644	0.239065	0.379559	0.621483
Q15797	Mothers against decapentaplegic homolog 1 OS=Homo sapiens GN=SMAD1 PE=1 SV=1	644.03	468.007	560.468	589.23	745.407	625.702	557.502	653.446	0.239082	-0.229093	0.621454
A0A0C4DFM2	HCG1643764, isoform CRA_b OS=Homo sapiens GN=ZNF574 PE=1 SV=1	713.991	534.508	951.714	649.039	208.431	582.881	733.404	480.117	0.239197	0.611223	0.621244
Q9H8V3	Protein ECT2 OS=Homo sapiens GN=ECT2 PE=1 SV=4	593.567	593.644	477.756	718.918	715.356	536.413	554.989	656.896	0.239249	-0.243205	0.621149
O15211	Ral guanine nucleotide dissociation stimulator-like 2 OS=Homo sapiens GN=RGL2 PE=1 SV=1	557.304	599.356	569.519	567.188	638.389	672.147	575.393	625.908	0.239269	-0.121404	0.621113
O75940	Survival of motor neuron-related-splicing factor 30 OS=Homo sapiens GN=SMNDC1 PE=1 SV=1	636.422	473.6	547.466	671.076	767.9	549.588	552.496	662.855	0.239275	-0.262728	0.621102
Q14152	Eukaryotic translation initiation factor 3 subunit A OS=Homo sapiens GN=EIF3A PE=1 SV=1	648.62	605.756	593.399	603.226	578.939	583.514	615.925	588.56	0.23948	0.0655663	0.620731
E7EV46	Protein ERCC6-PGBD3 OS=Homo sapiens GN=ERCC6-PGBD3 PE=4 SV=1	628.712	610.253	647.371	536.829	642.111	525.012	628.778	567.984	0.23956	0.146701	0.620586
J3KN66	Torsin-1A-interacting protein 1 OS=Homo sapiens GN=TOR1AIP1 PE=1 SV=1	817.138	566.794	706.947	646.422	312.029	596.208	696.96	518.219	0.239647	0.427512	0.620427
Q5T7V8	RAB6-interacting golgin OS=Homo sapiens GN=GORAB PE=1 SV=1	403.239	541.183	527.858	618.58	974.485	536.283	490.76	709.782	0.240056	-0.532359	0.619687
P62993	Growth factor receptor-bound protein 2 OS=Homo sapiens GN=GRB2 PE=1 SV=1	743.511	577.73	617.838	620.94	519.121	548.606	646.359	562.889	0.240396	0.199487	0.619073
Q9NS56	E3 ubiquitin-protein ligase Topors OS=Homo sapiens GN=TOPORS PE=1 SV=1	514.817	568.855	586.078	572.805	749.034	609.842	556.583	643.894	0.240403	-0.210225	0.619059
Q99541	Perilipin-2 OS=Homo sapiens GN=PLIN2 PE=1 SV=2	608.08	573.945	735.278	498.54	583.627	589.447	639.101	557.205	0.240487	0.197837	0.618908
Q6ZRQ5	Protein MMS22-like OS=Homo sapiens GN=MMS22L PE=1 SV=3	437.725	625.667	558.102	532.313	701.067	730.244	540.498	654.541	0.240514	-0.276195	0.61886
P02768	Serum albumin OS=Homo sapiens GN=ALB PE=1 SV=2	600.82	710.253	758.734	622.817	289.964	618.598	689.936	510.46	0.240684	0.434665	0.618553
P78332	RNA-binding protein 6 OS=Homo sapiens GN=RBM6 PE=1 SV=5	890.622	601.323	657.943	731.733	305.223	472.236	716.629	503.064	0.240871	0.510486	0.618215
P09471	Guanine nucleotide-binding protein G(o) subunit alpha OS=Homo sapiens GN=GNAO1 PE=1 SV=4	597.837	579.124	537.413	592.58	706.998	597.344	571.458	632.307	0.242119	-0.145978	0.615972
Q8N3R9	MAGUK p55 subfamily member 5 OS=Homo sapiens GN=MPP5 PE=1 SV=3	624.9	625.959	669.283	621.382	472.227	600.29	640.048	564.633	0.242412	0.180866	0.615445
P52848	Bifunctional heparan sulfate N-deacetylase/N-sulfotransferase 1 OS=Homo sapiens GN=NDST1 PE=1 SV=1	501.527	546.521	473.648	556.767	918.527	602.119	507.232	692.471	0.24264	-0.449108	0.615038
Q15018	BRISC complex subunit Abro1 OS=Homo sapiens GN=FAM175B PE=1 SV=2	642.587	480.925	582.553	627.517	654.923	653.824	568.688	645.421	0.242897	-0.182603	0.614579
F6TLX2	Glyoxalase domain-containing protein 4 OS=Homo sapiens GN=GLOD4 PE=1 SV=1	551.517	668.687	666.429	535.781	547.957	610.514	628.878	564.751	0.242903	0.155166	0.614567
P16455	Methylated-DNA--protein-cysteine methyltransferase OS=Homo sapiens GN=MGMT PE=1 SV=1	360.106	542.839	534.177	450.666	946.292	736.583	479.041	711.18	0.24309	-0.570067	0.614234
Q13546	Receptor-interacting serine/threonine-protein kinase 1 OS=Homo sapiens GN=RIPK1 PE=1 SV=3	480.566	576.07	539.096	580.201	834.934	586.669	531.91	667.268	0.243137	-0.327083	0.61415
Q14145	Kelch-like ECH-associated protein 1 OS=Homo sapiens GN=KEAP1 PE=1 SV=2	480.248	629.692	582.749	621.883	598.462	694.793	564.229	638.379	0.243414	-0.178132	0.613655
E9PHG5	Cytochrome P450 20A1 OS=Homo sapiens GN=CYP20A1 PE=1 SV=1	540.356	696.666	705.241	512.73	469.141	648.724	647.421	543.531	0.244126	0.252341	0.612386
Q9HD20	Manganese-transporting ATPase 13A1 OS=Homo sapiens GN=ATP13A1 PE=1 SV=2	541.175	600.52	566.422	591.315	708.579	594.606	569.372	631.5	0.244809	-0.14941	0.611173
Q70CQ2	Ubiquitin carboxyl-terminal hydrolase 34 OS=Homo sapiens GN=USP34 PE=1 SV=2	498.851	582.863	611.238	561.122	694.554	649.31	564.318	634.995	0.244893	-0.170239	0.611024
H0YLW9	Transducin-like enhancer protein 3 OS=Homo sapiens GN=TLE3 PE=1 SV=1	713.219	517.897	1085.26	703.982	115.783	515.299	772.126	445.021	0.24524	0.794962	0.610409
Q96EP0	E3 ubiquitin-protein ligase RNF31 OS=Homo sapiens GN=RNF31 PE=1 SV=1	507.623	619.973	561.431	574.795	714.138	616.354	563.009	635.096	0.245549	-0.173817	0.609863
Q96DT7	Zinc finger and BTB domain-containing protein 10 OS=Homo sapiens GN=ZBTB10 PE=1 SV=2	616.591	546.385	580.582	659.86	656.5	572.611	581.186	629.657	0.245593	-0.115566	0.609783
Q9Y6I9	Testis-expressed sequence 264 protein OS=Homo sapiens GN=TEX264 PE=1 SV=1	859.632	593.529	702.747	721.526	262.251	518.612	718.636	500.796	0.245653	0.521038	0.609678
P05556	Integrin beta-1 OS=Homo sapiens GN=ITGB1 PE=1 SV=2	700.27	540.137	733.49	580.554	449.243	620.897	657.966	550.231	0.245891	0.257974	0.609258
Q8NBX0	Saccharopine dehydrogenase-like oxidoreductase OS=Homo sapiens GN=SCCPDH PE=1 SV=1	658.933	506.988	541.207	628.963	688.758	612.494	569.043	643.405	0.246022	-0.177189	0.609026
Q8NB46	Serine/threonine-protein phosphatase 6 regulatory ankyrin repeat subunit C OS=Homo sapiens GN=ANKRD52 PE=1 SV=3	547.522	636.662	548.24	612.187	618.852	643.155	577.475	624.732	0.246993	-0.113479	0.607315
Q9Y2X3	Nucleolar protein 58 OS=Homo sapiens GN=NOP58 PE=1 SV=1	833.913	551.946	649.596	630.138	413.889	563.338	678.485	535.789	0.248042	0.340654	0.605475
Q86UW6	NEDD4-binding protein 2 OS=Homo sapiens GN=N4BP2 PE=1 SV=2	544.14	577.107	524.872	644.425	779.365	546.024	548.706	656.605	0.248646	-0.258991	0.604419
P16278	Beta-galactosidase OS=Homo sapiens GN=GLB1 PE=1 SV=2	489.324	664.946	447.146	600.953	800.441	587.814	533.805	663.069	0.248664	-0.312846	0.604386
P50552	Vasodilator-stimulated phosphoprotein OS=Homo sapiens GN=VASP PE=1 SV=3	793.816	603.96	576.768	609.189	536.121	502.252	658.181	549.187	0.248728	0.261188	0.604275
O43813	LanC-like protein 1 OS=Homo sapiens GN=LANCL1 PE=1 SV=1	557.751	641.048	680.94	541.408	567.105	597.664	626.58	568.726	0.248796	0.139765	0.604156
O60573	Eukaryotic translation initiation factor 4E type 2 OS=Homo sapiens GN=EIF4E2 PE=1 SV=1	596.928	602.106	705.871	511.814	531.857	642.42	634.968	562.031	0.248803	0.176035	0.604145
A0A0J9YXF2	Paraoxonase 2, isoform CRA_a OS=Homo sapiens GN=PON2 PE=1 SV=1	413.382	592.73	562.212	503.156	810.986	695.569	522.775	669.904	0.248939	-0.357765	0.603908
Q9HD47	Ran guanine nucleotide release factor OS=Homo sapiens GN=RANGRF PE=1 SV=1	795.671	534.091	671.07	626.406	517.289	491.32	666.944	545.005	0.249008	0.291296	0.603786
P98172	Ephrin-B1 OS=Homo sapiens GN=EFNB1 PE=1 SV=1	563.402	569.121	526.662	617.947	771.211	565.318	553.062	651.492	0.249155	-0.236308	0.60353
X6RAY8	39S ribosomal protein L4, mitochondrial OS=Homo sapiens GN=MRPL4 PE=1 SV=1	641.76	510.684	571.709	679.719	576.647	671.605	574.718	642.657	0.249241	-0.161195	0.603381
Q86TP1	Protein prune homolog OS=Homo sapiens GN=PRUNE PE=1 SV=2	512.328	616.632	524.367	568.242	762.428	609.11	551.109	646.593	0.249389	-0.23052	0.603123
Q9UHB9	Signal recognition particle subunit SRP68 OS=Homo sapiens GN=SRP68 PE=1 SV=2	564.27	638.228	731.098	531.703	477.125	645.523	644.532	551.45	0.249892	0.225021	0.602248
E7EQ34	Uncharacterized protein OS=Homo sapiens PE=4 SV=2	508.343	552.795	521.103	553.517	850.303	612.648	527.414	672.156	0.250063	-0.349861	0.601951
Q03154	Aminoacylase-1 OS=Homo sapiens GN=ACY1 PE=1 SV=1	571.538	663.608	744.673	522.202	410.565	671.851	659.94	534.873	0.25028	0.303139	0.601574
Q16629	Serine/arginine-rich splicing factor 7 OS=Homo sapiens GN=SRSF7 PE=1 SV=1	583.024	604.096	750.392	524.276	489.123	641.537	645.837	551.645	0.250516	0.227429	0.601164
Q96SN8	CDK5 regulatory subunit-associated protein 2 OS=Homo sapiens GN=CDK5RAP2 PE=1 SV=5	662.92	588.671	798.883	548.607	333.59	677.702	683.491	519.966	0.25077	0.394505	0.600724
Q14568	Heat shock protein HSP 90-alpha A2 OS=Homo sapiens GN=HSP90AA2P PE=1 SV=2	634.296	616.651	685.113	554.587	458.356	654.663	645.353	555.869	0.250854	0.215345	0.600578
Q14141	Septin-6 OS=Homo sapiens GN=SEPT6 PE=1 SV=4	480.808	616.242	577.561	562.503	716.899	636.921	558.204	638.774	0.251664	-0.194514	0.599179
Q9NUL5	UPF0515 protein C19orf66 OS=Homo sapiens GN=C19orf66 PE=1 SV=2	845.882	593.621	771.012	585.028	149.687	690.564	736.838	475.093	0.251902	0.633138	0.598769
Q13347	Eukaryotic translation initiation factor 3 subunit I OS=Homo sapiens GN=EIF3I PE=1 SV=1	634.608	574.915	677.415	556.997	535.171	629.453	628.98	573.874	0.251915	0.13228	0.598747
O75306	NADH dehydrogenase [ubiquinone] iron-sulfur protein 2, mitochondrial OS=Homo sapiens GN=NDUFS2 PE=1 SV=2	520.07	608.83	563.018	575.137	720.636	608.89	563.973	634.887	0.251956	-0.170875	0.598676
Q96QE3	ATPase family AAA domain-containing protein 5 OS=Homo sapiens GN=ATAD5 PE=1 SV=4	676.023	630.836	650.237	652.106	441.31	572.956	652.365	555.457	0.252951	0.232005	0.596963
Q96QB1	Rho GTPase-activating protein 7 OS=Homo sapiens GN=DLC1 PE=1 SV=4	423.01	654.71	484.929	518.722	818.275	672.416	520.883	669.804	0.253236	-0.36278	0.596475
Q93063	Exostosin-2 OS=Homo sapiens GN=EXT2 PE=1 SV=1	461.719	577.109	537.865	532.744	845.519	632.362	525.564	670.208	0.253385	-0.350743	0.596218
Q14240	Eukaryotic initiation factor 4A-II OS=Homo sapiens GN=EIF4A2 PE=1 SV=2	541.207	590.882	608.617	587.08	611.464	669.128	580.236	622.558	0.253799	-0.101568	0.595509
Q9H939	Proline-serine-threonine phosphatase-interacting protein 2 OS=Homo sapiens GN=PSTPIP2 PE=1 SV=4	935.872	478.448	733.569	620.049	355.306	534.658	715.963	503.338	0.253989	0.508358	0.595186
A0A087X2H1	E3 ubiquitin-protein ligase HECTD1 OS=Homo sapiens GN=HECTD1 PE=1 SV=1	555.502	669.146	666.812	563.085	514.203	619.859	630.486	565.715	0.254147	0.156389	0.594915
Q5JS54	Proteasome assembly chaperone 4 OS=Homo sapiens GN=PSMG4 PE=2 SV=2	1046.69	407.013	824.177	593.925	292.005	505.656	759.294	463.862	0.254172	0.710963	0.594873
A0A0A6YYL6	Protein RPL17-C18orf32 OS=Homo sapiens GN=RPL17-C18orf32 PE=3 SV=1	606.032	570.972	545.388	666.979	681.526	557.82	574.131	635.442	0.254338	-0.146381	0.594589
Q9Y3E7	Charged multivesicular body protein 3 OS=Homo sapiens GN=CHMP3 PE=1 SV=3	561.323	525.048	538.739	650.439	812.28	538.132	541.703	666.95	0.254903	-0.300077	0.593626
Q96J02	E3 ubiquitin-protein ligase Itchy homolog OS=Homo sapiens GN=ITCH PE=1 SV=2	466.038	613.048	608.642	603.729	627.356	684.956	562.576	638.68	0.255095	-0.183045	0.593298
Q96GC9	Vacuole membrane protein 1 OS=Homo sapiens GN=VMP1 PE=1 SV=1	873.634	549.61	885.485	714.149	62.5881	583.192	769.576	453.31	0.25522	0.763567	0.593085
H0Y4E8	Serine/threonine-protein kinase SIK3 (Fragment) OS=Homo sapiens GN=SIK3 PE=1 SV=1	672.062	509.516	831.63	420.49	595.746	552.442	671.07	522.893	0.25527	0.359948	0.593001
P51659	Peroxisomal multifunctional enzyme type 2 OS=Homo sapiens GN=HSD17B4 PE=1 SV=3	653.308	532.227	538.613	708.004	607.351	613.261	574.716	642.872	0.255397	-0.161682	0.592785
P42224	Signal transducer and activator of transcription 1-alpha/beta OS=Homo sapiens GN=STAT1 PE=1 SV=2	530.379	594.479	599.316	566.038	643.236	668.185	574.725	625.82	0.255702	-0.122876	0.592266
P78316	Nucleolar protein 14 OS=Homo sapiens GN=NOP14 PE=1 SV=3	597.471	708.081	624.061	488.145	669.788	469.613	643.204	542.515	0.256207	0.245613	0.59141
P78346	Ribonuclease P protein subunit p30 OS=Homo sapiens GN=RPP30 PE=1 SV=1	518.094	629.771	510.99	608.674	759.686	571.767	552.952	646.709	0.256274	-0.225964	0.591295
F5GXJ1	NADH dehydrogenase [ubiquinone] iron-sulfur protein 7, mitochondrial OS=Homo sapiens GN=NDUFS7 PE=1 SV=1	631.318	707.834	553.514	522.155	581.686	580.242	630.889	561.361	0.25634	0.168457	0.591184
P49902	Cytosolic purine 5'-nucleotidase OS=Homo sapiens GN=NT5C2 PE=1 SV=1	680.393	597.641	601.633	614.109	588.96	533.761	626.556	578.943	0.256491	0.114021	0.590928
P0CAP2	DNA-directed RNA polymerase II subunit GRINL1A OS=Homo sapiens GN=POLR2M PE=1 SV=1	727.215	593.898	704.553	679.791	377.076	556.445	675.222	537.771	0.256554	0.328372	0.59082
O60832	H/ACA ribonucleoprotein complex subunit 4 OS=Homo sapiens GN=DKC1 PE=1 SV=3	644.737	505.945	573.325	635.567	674.507	603.073	574.669	637.716	0.256611	-0.150182	0.590724
Q6PJ69	Tripartite motif-containing protein 65 OS=Homo sapiens GN=TRIM65 PE=1 SV=3	521.978	566.269	578.365	559.512	753.361	620.452	555.537	644.442	0.256777	-0.214167	0.590444
P30048	Thioredoxin-dependent peroxide reductase, mitochondrial OS=Homo sapiens GN=PRDX3 PE=1 SV=3	520.621	656.24	510.79	602.178	685.489	622.085	562.55	636.584	0.256843	-0.178369	0.590332
Q96RS0	Trimethylguanosine synthase OS=Homo sapiens GN=TGS1 PE=1 SV=3	702.328	463.02	456.567	807.2	713.771	543.883	540.638	688.285	0.256954	-0.348341	0.590144
Q96HR9	Receptor expression-enhancing protein 6 OS=Homo sapiens GN=REEP6 PE=1 SV=1	693.996	658.767	547.367	505.581	586.79	593.864	633.377	562.078	0.257333	0.172293	0.589504
Q9UMZ2	Synergin gamma OS=Homo sapiens GN=SYNRG PE=1 SV=2	474.391	602.861	553.041	587.477	796.126	580.511	543.431	654.705	0.257503	-0.268747	0.589219
Q9GZR1	Sentrin-specific protease 6 OS=Homo sapiens GN=SENP6 PE=1 SV=2	670.329	650.93	646.955	660.439	428.888	563.889	656.071	551.072	0.257524	0.251612	0.589183
A0A087WUT6	Eukaryotic translation initiation factor 5B OS=Homo sapiens GN=EIF5B PE=1 SV=1	637.68	601.918	604.119	610.411	564.123	597.592	614.572	590.709	0.257719	0.0571362	0.588854
P36776	Lon protease homolog, mitochondrial OS=Homo sapiens GN=LONP1 PE=1 SV=2	553.271	614.519	585.446	594.211	605.769	653.413	584.412	617.798	0.257797	-0.0801481	0.588723
Q8NFU3	Thiosulfate sulfurtransferase/rhodanese-like domain-containing protein 1 OS=Homo sapiens GN=TSTD1 PE=1 SV=3	283.002	497.07	616.264	486.613	1037.8	652.458	465.446	725.623	0.257799	-0.640607	0.588719
Q8NFZ0	F-box DNA helicase 1 OS=Homo sapiens GN=FBXO18 PE=1 SV=2	537.869	537.448	610.534	649.326	552.096	749.919	561.95	650.447	0.258559	-0.210989	0.58744
Q6ZNW5	GDP-D-glucose phosphorylase 1 OS=Homo sapiens GN=GDPGP1 PE=1 SV=2	554.459	558.767	532.341	536.932	766.439	651.712	548.522	651.695	0.258668	-0.248647	0.587257
G3V4T6	Maleylacetoacetate isomerase OS=Homo sapiens GN=GSTZ1 PE=1 SV=1	537.437	708.742	656.543	483.864	593	579.072	634.241	551.979	0.259135	0.200418	0.586474
P46934	E3 ubiquitin-protein ligase NEDD4 OS=Homo sapiens GN=NEDD4 PE=1 SV=4	617.967	648.999	588.145	584.82	545.138	617.271	618.37	582.41	0.259596	0.0864373	0.585701
O95163	Elongator complex protein 1 OS=Homo sapiens GN=IKBKAP PE=1 SV=3	594.271	673.923	591.639	567.611	556.182	608.043	619.944	577.278	0.259771	0.102871	0.585409
Q92621	Nuclear pore complex protein Nup205 OS=Homo sapiens GN=NUP205 PE=1 SV=3	566.775	653.513	668.397	567.047	509.322	628.439	629.562	568.269	0.260583	0.147772	0.584054
Q7Z4L5	Tetratricopeptide repeat protein 21B OS=Homo sapiens GN=TTC21B PE=1 SV=2	564.561	629.779	526.742	572.913	654.205	651.876	573.694	626.331	0.261878	-0.126644	0.581901
Q68CP9	AT-rich interactive domain-containing protein 2 OS=Homo sapiens GN=ARID2 PE=1 SV=2	609.254	624.414	598.905	610.894	571.168	595.367	610.858	592.476	0.262961	0.0440792	0.580109
P49448	Glutamate dehydrogenase 2, mitochondrial OS=Homo sapiens GN=GLUD2 PE=1 SV=2	637.578	622.193	669.527	574.808	457.763	645.634	643.1	559.402	0.263074	0.201158	0.579922
P0CG08	Golgi pH regulator B OS=Homo sapiens GN=GPR89B PE=1 SV=1	563.335	622.858	541.65	570.985	663.936	636.608	575.948	623.843	0.263405	-0.115245	0.579376
Q13415	Origin recognition complex subunit 1 OS=Homo sapiens GN=ORC1 PE=1 SV=2	601.17	558.101	610.351	650.655	613.583	594.915	589.874	619.718	0.263742	-0.0712045	0.578821
Q2TAA5	GDP-Man:Man(3)GlcNAc(2)-PP-Dol alpha-1,2-mannosyltransferase OS=Homo sapiens GN=ALG11 PE=1 SV=2	510.526	654.288	539.043	641.444	611.765	651.566	567.952	634.925	0.26379	-0.160816	0.578742
Q96RF0	Sorting nexin-18 OS=Homo sapiens GN=SNX18 PE=1 SV=2	761.6	555.664	707.162	644.464	376.108	596.818	674.809	539.13	0.263809	0.323844	0.57871
O75792	Ribonuclease H2 subunit A OS=Homo sapiens GN=RNASEH2A PE=1 SV=2	514.055	580.903	550.931	562.406	781.361	607.219	548.63	650.329	0.263889	-0.245336	0.578578
J3KN16	Proteasome-associated protein ECM29 homolog OS=Homo sapiens GN=KIAA0368 PE=1 SV=1	669.685	604.601	648.207	626.487	470.363	603.282	640.831	566.71	0.264012	0.177332	0.578376
A0A0D9SFP9	Uncharacterized protein OS=Homo sapiens PE=4 SV=1	522.919	563.685	614.098	549.498	667.512	684.877	566.901	633.962	0.264089	-0.1613	0.578249
P17812	CTP synthase 1 OS=Homo sapiens GN=CTPS1 PE=1 SV=2	649.597	628.493	579.196	612.2	585.382	555.54	619.095	584.374	0.264139	0.0832701	0.578167
P0C7P0	CDGSH iron-sulfur domain-containing protein 3, mitochondrial OS=Homo sapiens GN=CISD3 PE=1 SV=1	668.525	616.883	931.786	619.084	121.454	665.406	739.065	468.648	0.264581	0.657195	0.577442
Q9H5Z1	Probable ATP-dependent RNA helicase DHX35 OS=Homo sapiens GN=DHX35 PE=1 SV=2	519.898	621.631	592.274	617.712	636.041	618.328	577.934	624.027	0.264649	-0.110702	0.57733
P18754	Regulator of chromosome condensation OS=Homo sapiens GN=RCC1 PE=1 SV=1	580.86	612.489	535.76	618.071	684.849	577.762	576.37	626.894	0.26496	-0.121228	0.57682
Q96CB8	Integrator complex subunit 12 OS=Homo sapiens GN=INTS12 PE=1 SV=1	831.346	558.849	742.383	713.571	273.772	540.539	710.859	509.294	0.265092	0.481066	0.576604
Q12834	Cell division cycle protein 20 homolog OS=Homo sapiens GN=CDC20 PE=1 SV=2	659.092	544.787	448.951	742.936	723.34	535.378	550.943	667.218	0.265607	-0.276254	0.57576
Q9NZD2	Glycolipid transfer protein OS=Homo sapiens GN=GLTP PE=1 SV=3	555.713	703.446	757.837	583.864	341.415	648.468	672.332	524.582	0.265874	0.358006	0.575324
O00308	NEDD4-like E3 ubiquitin-protein ligase WWP2 OS=Homo sapiens GN=WWP2 PE=1 SV=2	463.487	540.201	642.107	764.241	519.096	727.862	548.599	670.4	0.266097	-0.28927	0.574959
Q9BT73	Proteasome assembly chaperone 3 OS=Homo sapiens GN=PSMG3 PE=1 SV=1	592.367	626.247	458.882	767.9	601.879	600.307	559.165	656.695	0.266528	-0.231949	0.574258
Q68DK7	Male-specific lethal 1 homolog OS=Homo sapiens GN=MSL1 PE=1 SV=3	514.829	652.084	876.409	454.793	397.51	668.427	681.107	506.91	0.266577	0.426153	0.574177
P04792	Heat shock protein beta-1 OS=Homo sapiens GN=HSPB1 PE=1 SV=2	617.865	582.415	648.207	564.585	612.185	578.945	616.162	585.238	0.266856	0.074286	0.573724
Q8TDX7	Serine/threonine-protein kinase Nek7 OS=Homo sapiens GN=NEK7 PE=1 SV=1	583.971	680.3	606.577	503.522	594.753	604.581	623.616	567.619	0.266872	0.135736	0.573697
Q8IXQ5	Kelch-like protein 7 OS=Homo sapiens GN=KLHL7 PE=1 SV=2	566.544	525.983	623.002	558.515	672.27	666.525	571.843	632.436	0.266917	-0.145302	0.573625
Q03164	Histone-lysine N-methyltransferase 2A OS=Homo sapiens GN=KMT2A PE=1 SV=5	601.892	626.59	748.738	557.194	402.633	663.528	659.073	541.119	0.266923	0.284494	0.573614
P27105	Erythrocyte band 7 integral membrane protein OS=Homo sapiens GN=STOM PE=1 SV=3	506.04	625.806	555.714	559.805	634.144	715.339	562.52	636.429	0.267011	-0.178096	0.57347
P35244	Replication protein A 14 kDa subunit OS=Homo sapiens GN=RPA3 PE=1 SV=1	508.76	608.872	551.05	596.191	756.608	576.985	556.227	643.261	0.267264	-0.209731	0.573059
O75083	WD repeat-containing protein 1 OS=Homo sapiens GN=WDR1 PE=1 SV=4	632.385	604.416	605.373	572.879	570.707	621.728	614.058	588.438	0.267584	0.0614848	0.572539
Q9BTX7	Alpha-tocopherol transfer protein-like OS=Homo sapiens GN=TTPAL PE=1 SV=2	439.734	664.104	546.97	605.711	654.226	683.695	550.27	647.877	0.267718	-0.235582	0.572322
Q9C0C7	Activating molecule in BECN1-regulated autophagy protein 1 OS=Homo sapiens GN=AMBRA1 PE=1 SV=2	399.556	620.485	523.866	469.707	768.343	789.419	514.635	675.823	0.26789	-0.393095	0.572043
E9PK25	Cofilin-1 OS=Homo sapiens GN=CFL1 PE=1 SV=1	614.607	591.742	644.762	561.102	568.982	623.769	617.037	584.618	0.268017	0.0778644	0.571837
O43464	Serine protease HTRA2, mitochondrial OS=Homo sapiens GN=HTRA2 PE=1 SV=2	618.78	605.252	467.466	727.681	653.4	568.098	563.832	649.727	0.268043	-0.204566	0.571796
O43293	Death-associated protein kinase 3 OS=Homo sapiens GN=DAPK3 PE=1 SV=1	591.985	547.343	398.284	692.512	913.065	489.199	512.537	698.259	0.268344	-0.446105	0.571308
Q92843	Bcl-2-like protein 2 OS=Homo sapiens GN=BCL2L2 PE=1 SV=2	628.456	557.275	484.66	637.033	761.026	556.838	556.797	651.632	0.268352	-0.226907	0.571296
O15554	Intermediate conductance calcium-activated potassium channel protein 4 OS=Homo sapiens GN=KCNN4 PE=1 SV=1	595.557	626.021	505.194	663.228	639.021	592.356	575.591	631.535	0.268441	-0.133819	0.57115
Q96HE7	ERO1-like protein alpha OS=Homo sapiens GN=ERO1A PE=1 SV=2	517.706	623.062	588.847	605.551	604.404	666.418	576.539	625.458	0.268565	-0.117495	0.570951
Q9Y4F3	Meiosis arrest female protein 1 OS=Homo sapiens GN=KIAA0430 PE=1 SV=6	448.802	578.505	567.891	514.616	814.16	659.464	531.732	662.746	0.269098	-0.317757	0.57009
Q14157	Ubiquitin-associated protein 2-like OS=Homo sapiens GN=UBAP2L PE=1 SV=2	736.624	631.751	568.598	604.121	607.53	460.037	645.657	557.229	0.269358	0.212498	0.569671
Q86Y37	CDK2-associated and cullin domain-containing protein 1 OS=Homo sapiens GN=CACUL1 PE=1 SV=1	617.627	718.837	597.159	639.421	450.257	579.536	644.541	556.405	0.269603	0.212137	0.569276
P33993	DNA replication licensing factor MCM7 OS=Homo sapiens GN=MCM7 PE=1 SV=4	595.124	608.813	531.768	616.404	676.832	582.594	578.568	625.277	0.269826	-0.112007	0.568916
Q9NRF8	CTP synthase 2 OS=Homo sapiens GN=CTPS2 PE=1 SV=1	571.858	570.91	617.458	643.021	577.532	645.317	586.742	621.956	0.270374	-0.0840864	0.568034
Q86TI2	Dipeptidyl peptidase 9 OS=Homo sapiens GN=DPP9 PE=1 SV=3	650.795	613.612	690.702	603.514	423.648	633.876	651.703	553.679	0.270647	0.235164	0.567596
Q15006	ER membrane protein complex subunit 2 OS=Homo sapiens GN=EMC2 PE=1 SV=1	525.13	629.942	575.206	598.009	657.211	614.498	576.759	623.239	0.27087	-0.111817	0.567239
P54802	Alpha-N-acetylglucosaminidase OS=Homo sapiens GN=NAGLU PE=1 SV=2	667.256	543.036	461.721	677.106	728.677	563.418	557.338	656.4	0.271096	-0.236024	0.566876
Q9H4L4	Sentrin-specific protease 3 OS=Homo sapiens GN=SENP3 PE=1 SV=2	628.565	599.822	709.923	593.607	446.698	635.211	646.103	558.505	0.271267	0.210193	0.566603
Q9P258	Protein RCC2 OS=Homo sapiens GN=RCC2 PE=1 SV=2	600.918	589.71	596.211	629.69	593.88	609.625	595.613	611.065	0.271339	-0.0369505	0.566488
Q9H019	Mitochondrial fission regulator 1-like OS=Homo sapiens GN=MTFR1L PE=1 SV=2	416.98	526.658	426.186	412.376	740.039	1070.87	456.608	741.095	0.271354	-0.698701	0.566464
Q9Y6J0	Calcineurin-binding protein cabin-1 OS=Homo sapiens GN=CABIN1 PE=1 SV=1	530.455	571.195	627.218	617.261	583.168	689.979	576.289	630.136	0.271647	-0.128869	0.565995
Q9H7F0	Probable cation-transporting ATPase 13A3 OS=Homo sapiens GN=ATP13A3 PE=1 SV=4	519.057	637.354	563.711	587.341	646.238	644.219	573.374	625.932	0.271911	-0.126531	0.565573
Q3KQU3	MAP7 domain-containing protein 1 OS=Homo sapiens GN=MAP7D1 PE=1 SV=1	723.388	632.723	640.79	690.214	411.943	534.982	665.634	545.713	0.271941	0.286586	0.565525
J3KTA1	F-box and leucine-rich repeat protein 20, isoform CRA_a OS=Homo sapiens GN=FBXL20 PE=1 SV=1	454.94	737.038	834.728	389.854	483.41	627.349	675.569	500.204	0.271972	0.433584	0.565475
Q8IVF7	Formin-like protein 3 OS=Homo sapiens GN=FMNL3 PE=1 SV=3	571.088	589.573	783.589	502.63	544.496	593.225	648.083	546.784	0.272049	0.245209	0.565353
F8WBA3	Serine/threonine-protein kinase OS=Homo sapiens GN=PRKD1 PE=1 SV=1	440.439	604.284	548.553	513.196	810.605	661.682	531.092	661.828	0.272244	-0.317494	0.565041
Q96RL1	BRCA1-A complex subunit RAP80 OS=Homo sapiens GN=UIMC1 PE=1 SV=2	632.67	581.953	686.026	630.901	507.849	582.825	633.55	573.858	0.272593	0.142764	0.564486
O43252	Bifunctional 3'-phosphoadenosine 5'-phosphosulfate synthase 1 OS=Homo sapiens GN=PAPSS1 PE=1 SV=2	568.659	683.098	661.14	511.765	493.064	660.265	637.632	555.032	0.272655	0.200155	0.564386
Q8N9M1	Uncharacterized protein C19orf47 OS=Homo sapiens GN=C19orf47 PE=1 SV=1	949.44	521.339	841.664	769.273	81.4886	525.773	770.814	458.845	0.272952	0.748377	0.563913
C9J4K0	Ashwin OS=Homo sapiens GN=C2orf49 PE=1 SV=1	623.223	626.61	684.906	612.035	444.447	621.821	644.913	559.434	0.272964	0.205136	0.563895
Q12849	G-rich sequence factor 1 OS=Homo sapiens GN=GRSF1 PE=1 SV=3	752.844	509.874	738.521	595.715	442.501	596.146	667.079	544.787	0.27314	0.292165	0.563615
Q15032	R3H domain-containing protein 1 OS=Homo sapiens GN=R3HDM1 PE=1 SV=3	565.984	592.234	516.623	600.794	758.271	572.927	558.28	643.997	0.27327	-0.206065	0.563408
H0YDF6	NHS-like protein 1 (Fragment) OS=Homo sapiens GN=NHSL1 PE=1 SV=1	617.078	507.925	568.441	749.113	671.989	543.621	564.482	654.907	0.273326	-0.214365	0.563319
P78395	Melanoma antigen preferentially expressed in tumors OS=Homo sapiens GN=PRAME PE=1 SV=1	479.935	639.363	546.485	545.468	703.759	670.758	555.261	639.995	0.273526	-0.204895	0.563002
O60675	Transcription factor MafK OS=Homo sapiens GN=MAFK PE=1 SV=1	528.137	608.756	476.446	594.379	827.41	563.727	537.78	661.839	0.274512	-0.299464	0.561439
P12236	ADP/ATP translocase 3 OS=Homo sapiens GN=SLC25A6 PE=1 SV=4	729.097	554.435	637.266	572.754	580.035	544.017	640.266	565.602	0.274761	0.178885	0.561045
P16152	Carbonyl reductase [NADPH] 1 OS=Homo sapiens GN=CBR1 PE=1 SV=3	557.961	604.578	552.197	596.715	708.001	584.68	571.579	629.799	0.2748	-0.139938	0.560984
B1ALK7	Rho guanine nucleotide exchange factor 7 OS=Homo sapiens GN=ARHGEF7 PE=1 SV=1	461.862	715.052	878.22	450.946	390.577	651.303	685.045	497.609	0.274825	0.461187	0.560944
Q12830	Nucleosome-remodeling factor subunit BPTF OS=Homo sapiens GN=BPTF PE=1 SV=3	569.554	711.2	602.753	557.03	602.067	533.346	627.836	564.147	0.275168	0.154314	0.560402
Q8TEQ0	Sorting nexin-29 OS=Homo sapiens GN=SNX29 PE=1 SV=3	484.102	613.339	606.047	649.938	570.15	693.827	567.829	637.972	0.275421	-0.168035	0.560003
Q9NP72	Ras-related protein Rab-18 OS=Homo sapiens GN=RAB18 PE=1 SV=1	519.072	630.723	558.342	589.213	697.939	600.907	569.379	629.353	0.275537	-0.14448	0.55982
P78314	SH3 domain-binding protein 2 OS=Homo sapiens GN=SH3BP2 PE=1 SV=2	750.534	703.674	553.211	703.767	457.133	455.375	669.14	538.758	0.275569	0.312671	0.55977
Q9UQR1	Zinc finger protein 148 OS=Homo sapiens GN=ZNF148 PE=1 SV=2	500.328	603.409	514.852	569.346	818.084	586.6	539.53	658.01	0.275669	-0.286408	0.559612
Q9HAU4	E3 ubiquitin-protein ligase SMURF2 OS=Homo sapiens GN=SMURF2 PE=1 SV=1	571.163	522.164	639.559	640.608	581.356	680.244	577.629	634.069	0.275705	-0.134498	0.559556
Q9H5U6	Zinc finger CCHC domain-containing protein 4 OS=Homo sapiens GN=ZCCHC4 PE=1 SV=3	692.421	520.083	1039.11	565.198	119.656	691.393	750.539	458.749	0.27619	0.710222	0.558792
P35080	Profilin-2 OS=Homo sapiens GN=PFN2 PE=1 SV=3	684.345	492.713	519.755	714.006	643.942	607.615	565.604	655.188	0.276259	-0.212115	0.558683
Q9H1Y0	Autophagy protein 5 OS=Homo sapiens GN=ATG5 PE=1 SV=2	619.694	635.199	614.333	515.002	635.672	563.379	623.076	571.351	0.276488	0.12503	0.558324
Q3SYG4	Protein PTHB1 OS=Homo sapiens GN=BBS9 PE=1 SV=1	245.758	309.58	212.414	393.863	1843.97	562.661	255.917	933.499	0.276774	-1.86697	0.557874
O60921	Checkpoint protein HUS1 OS=Homo sapiens GN=HUS1 PE=1 SV=1	446.54	680.262	1072.65	372.474	262.446	701.367	733.151	445.429	0.276941	0.718914	0.557612
Q9GZR7	ATP-dependent RNA helicase DDX24 OS=Homo sapiens GN=DDX24 PE=1 SV=1	559.816	645.804	658.681	569.105	562.317	596.467	621.433	575.963	0.277795	0.109624	0.556275
P02649	Apolipoprotein E OS=Homo sapiens GN=APOE PE=1 SV=1	488.858	671.904	436.643	675.659	806.062	524.289	532.469	668.67	0.277816	-0.328598	0.556243
P37802	Transgelin-2 OS=Homo sapiens GN=TAGLN2 PE=1 SV=3	692.472	566.703	633.701	614.087	564.41	552.01	630.959	576.836	0.277951	0.129385	0.556032
Q13772	Nuclear receptor coactivator 4 OS=Homo sapiens GN=NCOA4 PE=1 SV=1	506.619	567.509	504.267	601.071	875.661	548.363	526.132	675.031	0.277985	-0.35953	0.555979
P11908	Ribose-phosphate pyrophosphokinase 2 OS=Homo sapiens GN=PRPS2 PE=1 SV=2	568.149	624.164	744.376	559.417	460.511	640.18	645.563	553.37	0.277998	0.222314	0.555959
Q9P275	Ubiquitin carboxyl-terminal hydrolase 36 OS=Homo sapiens GN=USP36 PE=1 SV=3	735.374	628.578	593.457	667.337	458.055	548.265	652.47	557.886	0.278202	0.225941	0.55564
P43007	Neutral amino acid transporter A OS=Homo sapiens GN=SLC1A4 PE=1 SV=1	737.542	424.811	1109.28	453.833	205.64	686.723	757.21	448.732	0.278278	0.754839	0.555522
Q9Y5U9	Immediate early response 3-interacting protein 1 OS=Homo sapiens GN=IER3IP1 PE=1 SV=1	530.78	674.686	469.231	692.205	640.303	609.814	558.232	647.44	0.278596	-0.213882	0.555025
Q9H4Z3	Phosphorylated CTD-interacting factor 1 OS=Homo sapiens GN=PCIF1 PE=1 SV=1	398.168	454.899	559.416	665.936	1079.16	462.51	470.827	735.869	0.278976	-0.64425	0.554433
A0A0G2JPR0	Complement C4-A OS=Homo sapiens GN=C4A PE=1 SV=1	499.757	538.98	599.993	512.223	753.927	690.479	546.243	652.21	0.27898	-0.255792	0.554427
Q9NZC7	WW domain-containing oxidoreductase OS=Homo sapiens GN=WWOX PE=1 SV=1	586.281	623.294	452.591	640.964	752.81	556.982	554.056	650.252	0.279351	-0.230968	0.55385
P07900	Heat shock protein HSP 90-alpha OS=Homo sapiens GN=HSP90AA1 PE=1 SV=5	602.61	605.523	577.972	624.551	606.306	598.872	595.368	609.91	0.279425	-0.0348127	0.553735
Q15819	Ubiquitin-conjugating enzyme E2 variant 2 OS=Homo sapiens GN=UBE2V2 PE=1 SV=4	519.634	610.61	547.781	537.894	717.755	656.92	559.342	637.523	0.279589	-0.188747	0.553479
Q9H6L2	Transmembrane protein 231 OS=Homo sapiens GN=TMEM231 PE=1 SV=1	751.763	877.251	625.127	388.889	73.6598	831.224	751.38	431.258	0.279849	0.800993	0.553076
Q13206	Probable ATP-dependent RNA helicase DDX10 OS=Homo sapiens GN=DDX10 PE=1 SV=2	835.264	592.529	572.278	613.152	547.117	465.393	666.69	541.888	0.280171	0.299023	0.552577
Q6PJG9	Leucine-rich repeat and fibronectin type-III domain-containing protein 4 OS=Homo sapiens GN=LRFN4 PE=1 SV=1	369.869	505.043	421.967	359.19	785.759	1142.35	432.293	762.432	0.280616	-0.8186	0.551888
P28330	Long-chain specific acyl-CoA dehydrogenase, mitochondrial OS=Homo sapiens GN=ACADL PE=1 SV=2	697.152	574.868	676.342	581.063	442.95	649.107	649.454	557.707	0.280742	0.219721	0.551692
Q8WUD1	Ras-related protein Rab-2B OS=Homo sapiens GN=RAB2B PE=1 SV=1	589.586	611.501	539.232	646.528	661.926	568.277	580.106	625.577	0.28102	-0.10887	0.551263
Q9ULI0	ATPase family AAA domain-containing protein 2B OS=Homo sapiens GN=ATAD2B PE=1 SV=3	603.194	711.821	690.39	642.392	348.339	609.261	668.468	533.331	0.281033	0.325829	0.551242
Q9Y3Q8	TSC22 domain family protein 4 OS=Homo sapiens GN=TSC22D4 PE=1 SV=2	643.659	640.322	655.815	531.479	671.96	436.156	646.598	546.532	0.28117	0.242565	0.551031
Q92598	Heat shock protein 105 kDa OS=Homo sapiens GN=HSPH1 PE=1 SV=1	612.002	586.394	640.682	575.307	609.817	581.765	613.026	588.963	0.281197	0.0577711	0.55099
P60520	Gamma-aminobutyric acid receptor-associated protein-like 2 OS=Homo sapiens GN=GABARAPL2 PE=1 SV=1	534.108	747.88	630.322	493.3	589.023	558.894	637.437	547.073	0.281574	0.22055	0.550408
Q99470	Stromal cell-derived factor 2 OS=Homo sapiens GN=SDF2 PE=1 SV=2	828.9	562.377	714.09	651.505	268.212	625.528	701.789	515.082	0.281671	0.446235	0.550258
Q8WUH2	Transforming growth factor-beta receptor-associated protein 1 OS=Homo sapiens GN=TGFBRAP1 PE=1 SV=1	483.283	633.678	574.17	572.072	690.164	637.662	563.71	633.299	0.281789	-0.167934	0.550076
Q9Y4D1	Disheveled-associated activator of morphogenesis 1 OS=Homo sapiens GN=DAAM1 PE=1 SV=2	627.549	537.255	585.911	683.879	588.144	621.608	583.572	631.21	0.281903	-0.113211	0.5499
Q6UVJ0	Spindle assembly abnormal protein 6 homolog OS=Homo sapiens GN=SASS6 PE=1 SV=1	601.017	474.523	600.786	769.311	526.286	706.571	558.775	667.389	0.282039	-0.256259	0.54969
P60842	Eukaryotic initiation factor 4A-I OS=Homo sapiens GN=EIF4A1 PE=1 SV=1	550.901	573.86	611.376	573.24	620.635	679.009	578.712	624.295	0.282087	-0.109382	0.549618
Q9BW27	Nuclear pore complex protein Nup85 OS=Homo sapiens GN=NUP85 PE=1 SV=1	509.085	692.086	730.693	518.594	545.485	570.534	643.955	544.871	0.282171	0.241045	0.549488
B4DR61	Protein transport protein Sec61 subunit alpha isoform 1 OS=Homo sapiens GN=SEC61A1 PE=1 SV=1	920.541	477.06	849.26	658.168	135.372	632.829	748.953	475.456	0.28222	0.655564	0.549413
Q9H6Y7	E3 ubiquitin-protein ligase RNF167 OS=Homo sapiens GN=RNF167 PE=1 SV=1	735.131	578.338	892.468	589.258	126.341	708.971	735.312	474.856	0.283384	0.630866	0.547625
Q9P2K8	Eukaryotic translation initiation factor 2-alpha kinase 4 OS=Homo sapiens GN=EIF2AK4 PE=1 SV=3	569.307	629.844	652.802	544.674	596.462	596.218	617.318	579.118	0.283475	0.0921563	0.547485
A0A0C4DFZ2	Arylsulfatase A OS=Homo sapiens GN=ARSA PE=1 SV=1	739.437	607.608	711.668	630.513	300.402	642.516	686.238	524.477	0.283657	0.387829	0.547207
Q96BY6	Dedicator of cytokinesis protein 10 OS=Homo sapiens GN=DOCK10 PE=1 SV=3	552.423	669.916	695.216	483.64	509.762	660.558	639.185	551.32	0.283961	0.213343	0.546742
Q9UFH2	Dynein heavy chain 17, axonemal OS=Homo sapiens GN=DNAH17 PE=1 SV=2	580.102	576.04	573.463	565.678	682.295	628.16	576.535	625.377	0.284016	-0.117318	0.546657
O95182	NADH dehydrogenase [ubiquinone] 1 alpha subcomplex subunit 7 OS=Homo sapiens GN=NDUFA7 PE=1 SV=3	648.382	606.389	793.009	569.801	311.333	683.235	682.593	521.456	0.284084	0.38848	0.546553
O43159	Ribosomal RNA-processing protein 8 OS=Homo sapiens GN=RRP8 PE=1 SV=2	655.871	638.578	634.513	609.239	449.551	626.099	642.987	561.63	0.284264	0.19517	0.546277
Q9BYX2	TBC1 domain family member 2A OS=Homo sapiens GN=TBC1D2 PE=1 SV=3	512.332	641.534	526.467	547.11	660.009	703.693	560.111	636.937	0.28444	-0.185439	0.54601
Q02790	Peptidyl-prolyl cis-trans isomerase FKBP4 OS=Homo sapiens GN=FKBP4 PE=1 SV=3	605.636	600.37	610.366	586.381	599.514	605.605	605.457	597.167	0.284471	0.0198915	0.545962
E9PNL2	Sorting nexin-7 OS=Homo sapiens GN=SNX7 PE=1 SV=1	763.752	655.698	715.066	659.656	206.163	633.47	711.505	499.763	0.284528	0.509631	0.545874
Q5TZA2	Rootletin OS=Homo sapiens GN=CROCC PE=1 SV=1	622.215	507.073	604.432	683.585	571.574	662.287	577.907	639.149	0.284609	-0.145315	0.545751
Q6P1M9	Armadillo repeat-containing X-linked protein 5 OS=Homo sapiens GN=ARMCX5 PE=1 SV=1	491.866	654.674	492.352	578.895	775.68	593.82	546.297	649.465	0.284677	-0.249566	0.545648
Q99871	HAUS augmin-like complex subunit 7 OS=Homo sapiens GN=HAUS7 PE=1 SV=3	412.515	649.577	548.502	567.278	790.156	611.341	536.864	656.258	0.284748	-0.289706	0.54554
Q92734	Protein TFG OS=Homo sapiens GN=TFG PE=1 SV=2	598.615	568.14	527.468	578.878	740.152	596.26	564.741	638.43	0.28491	-0.17694	0.545293
Q2M3D2	Exocyst complex component 3-like protein 2 OS=Homo sapiens GN=EXOC3L2 PE=2 SV=1	588.926	585.107	398.116	609.947	884.423	543.631	524.05	679.334	0.285167	-0.374417	0.5449
Q12906	Interleukin enhancer-binding factor 3 OS=Homo sapiens GN=ILF3 PE=1 SV=3	550.754	603.845	584.789	565.355	649.364	646.197	579.796	620.305	0.285526	-0.0974328	0.544355
Q4KMQ1	Taperin OS=Homo sapiens GN=TPRN PE=1 SV=2	887.263	681.288	556.072	763.008	355.965	406.536	708.208	508.503	0.285819	0.477916	0.543909
Q9NWM8	Peptidyl-prolyl cis-trans isomerase FKBP14 OS=Homo sapiens GN=FKBP14 PE=1 SV=1	565.717	723.173	683.944	534.149	392.17	679.647	657.611	535.322	0.286005	0.296828	0.543626
Q58A45	PAB-dependent poly(A)-specific ribonuclease subunit PAN3 OS=Homo sapiens GN=PAN3 PE=1 SV=3	495.752	582.191	531.058	513.124	810.029	654.176	536.334	659.11	0.286164	-0.297387	0.543385
Q8WUM4	Programmed cell death 6-interacting protein OS=Homo sapiens GN=PDCD6IP PE=1 SV=1	692.811	622.607	608.754	558.104	657.732	454.273	641.391	556.703	0.286281	0.204295	0.543208
P22415	Upstream stimulatory factor 1 OS=Homo sapiens GN=USF1 PE=1 SV=1	908.364	500.589	805.855	764.176	215.979	489.551	738.269	489.902	0.286287	0.591653	0.543199
O75356	Ectonucleoside triphosphate diphosphohydrolase 5 OS=Homo sapiens GN=ENTPD5 PE=1 SV=1	505.213	604.533	527.212	535.381	785.027	630.297	545.653	650.235	0.28637	-0.252979	0.543073
Q8WXD5	Gem-associated protein 6 OS=Homo sapiens GN=GEMIN6 PE=1 SV=1	564.685	562.826	591.573	683.447	546.517	690.955	573.028	640.306	0.286531	-0.160157	0.542829
Q14678	KN motif and ankyrin repeat domain-containing protein 1 OS=Homo sapiens GN=KANK1 PE=1 SV=3	532.925	617.394	515.627	568.969	761.575	597.68	555.315	642.741	0.286673	-0.210931	0.542612
H3BP20	Beta-hexosaminidase OS=Homo sapiens GN=HEXA PE=1 SV=1	669.557	607.054	671.976	626.1	430.549	617.971	649.529	558.207	0.286849	0.218595	0.542347
Q96I51	Williams-Beuren syndrome chromosomal region 16 protein OS=Homo sapiens GN=WBSCR16 PE=1 SV=2	434.113	534.901	592.641	466.854	820.28	733.277	520.552	673.47	0.286913	-0.371573	0.54225
Q02252	Methylmalonate-semialdehyde dehydrogenase [acylating], mitochondrial OS=Homo sapiens GN=ALDH6A1 PE=1 SV=2	517.025	650.34	799.305	532.407	471.825	608.499	655.557	537.577	0.286914	0.28625	0.542249
Q15758	Neutral amino acid transporter B(0) OS=Homo sapiens GN=SLC1A5 PE=1 SV=2	503.685	631.606	547.553	544.59	700.825	659.716	560.948	635.044	0.287064	-0.178988	0.542022
E9PCH4	Uncharacterized protein OS=Homo sapiens PE=4 SV=1	530.217	625.433	531.289	575.025	732.976	599.423	562.313	635.808	0.287179	-0.177219	0.541847
P78312	Protein FAM193A OS=Homo sapiens GN=FAM193A PE=1 SV=2	710.117	560.253	761.561	613.471	341.303	645.742	677.31	533.505	0.287253	0.344315	0.541735
Q86XL3	Ankyrin repeat and LEM domain-containing protein 2 OS=Homo sapiens GN=ANKLE2 PE=1 SV=4	675.004	491.589	545.637	692.322	614.467	639.646	570.743	648.812	0.287369	-0.184957	0.54156
P27449	V-type proton ATPase 16 kDa proteolipid subunit OS=Homo sapiens GN=ATP6V0C PE=1 SV=1	627.934	602.664	483.834	615.191	651.297	638.227	571.477	634.905	0.287483	-0.151845	0.541387
Q6ZMZ3	Nesprin-3 OS=Homo sapiens GN=SYNE3 PE=1 SV=2	459.539	621.274	496.035	527.174	855.494	618.829	525.616	667.166	0.287832	-0.344036	0.540861
Q92551	Inositol hexakisphosphate kinase 1 OS=Homo sapiens GN=IP6K1 PE=1 SV=3	681.49	527.264	749.076	627.609	531.757	511.232	652.61	556.866	0.28801	0.228891	0.540593
H0Y3P2	Eukaryotic translation initiation factor 4 gamma 2 OS=Homo sapiens GN=EIF4G2 PE=1 SV=1	664.218	598.417	668.647	621.195	452.089	618.242	643.761	563.842	0.288103	0.191234	0.540452
P38606	V-type proton ATPase catalytic subunit A OS=Homo sapiens GN=ATP6V1A PE=1 SV=2	648.845	522.274	552.445	728.792	582.958	624.456	574.521	645.402	0.288219	-0.167838	0.540277
Q9H8G2	Caspase activity and apoptosis inhibitor 1 OS=Homo sapiens GN=CAAP1 PE=1 SV=2	436.533	622.739	518.694	576.315	864.442	565.619	525.989	668.792	0.288228	-0.346526	0.540264
O14966	Ras-related protein Rab-7L1 OS=Homo sapiens GN=RAB29 PE=1 SV=1	476.035	598.43	551.669	530.209	795.284	633.263	542.045	652.919	0.288389	-0.268492	0.540021
Q5BJF6	Outer dense fiber protein 2 OS=Homo sapiens GN=ODF2 PE=1 SV=1	395.044	581.886	465.087	476.507	1014.89	633.562	480.672	708.321	0.288403	-0.55935	0.54
J3KQR7	Centrosomal protein of 170 kDa protein B OS=Homo sapiens GN=CEP170B PE=1 SV=1	598.384	586.061	601.848	596.638	626.034	602.692	595.431	608.455	0.288536	-0.0312155	0.5398
P30086	Phosphatidylethanolamine-binding protein 1 OS=Homo sapiens GN=PEBP1 PE=1 SV=3	582.202	665.541	622.698	589.506	517.919	620.233	623.48	575.886	0.289347	0.11456	0.538581
Q9BTV5	Fibronectin type III and SPRY domain-containing protein 1 OS=Homo sapiens GN=FSD1 PE=1 SV=1	489.64	588.192	608.82	542.896	666.927	698.993	562.217	636.272	0.289645	-0.178516	0.538134
Q8WUM9	Sodium-dependent phosphate transporter 1 OS=Homo sapiens GN=SLC20A1 PE=1 SV=1	586.873	629.98	687.35	546.603	490.133	654.606	634.734	563.781	0.289988	0.171019	0.537619
Q9UKV5	E3 ubiquitin-protein ligase AMFR OS=Homo sapiens GN=AMFR PE=1 SV=2	471.513	630.547	538.059	579.675	786.336	582.181	546.707	649.397	0.290232	-0.248335	0.537254
E5RIM7	Copper transport protein ATOX1 OS=Homo sapiens GN=ATOX1 PE=1 SV=1	438.39	455.961	725.879	636.986	635.155	744.368	540.076	672.17	0.290376	-0.315663	0.537039
Q9Y230	RuvB-like 2 OS=Homo sapiens GN=RUVBL2 PE=1 SV=3	592.007	633.425	656.865	565.193	509.637	642.083	627.432	572.304	0.290528	0.132677	0.536812
M0QZ12	GRAM domain-containing protein 1A OS=Homo sapiens GN=GRAMD1A PE=1 SV=1	547.813	624.754	474.832	539.88	767.592	635.119	549.133	647.53	0.290545	-0.237792	0.536786
Q9HB71	Calcyclin-binding protein OS=Homo sapiens GN=CACYBP PE=1 SV=2	591.943	634.816	627.604	555.175	633.699	546.324	618.121	578.399	0.290976	0.0958226	0.536142
P24666	Low molecular weight phosphotyrosine protein phosphatase OS=Homo sapiens GN=ACP1 PE=1 SV=3	486.056	574.503	506.605	557.553	890.452	576.79	522.388	674.932	0.291016	-0.369618	0.536083
Q52LJ0	Protein FAM98B OS=Homo sapiens GN=FAM98B PE=1 SV=1	624.854	633.864	583.835	549.101	616.328	586.072	614.184	583.833	0.291385	0.0731145	0.535533
Q9P0K7	Ankycorbin OS=Homo sapiens GN=RAI14 PE=1 SV=2	713.072	578.134	614.225	622.548	522.7	576.774	635.144	574.007	0.291627	0.146014	0.535173
Q06830	Peroxiredoxin-1 OS=Homo sapiens GN=PRDX1 PE=1 SV=1	609.769	579.281	596.25	618.885	622.432	591.746	595.1	611.021	0.291736	-0.0380906	0.53501
Q99811	Paired mesoderm homeobox protein 2 OS=Homo sapiens GN=PRRX2 PE=2 SV=2	530.889	619.435	515.685	584.063	582.641	777.87	555.336	648.192	0.291832	-0.223059	0.534868
Q9BVX2	Transmembrane protein 106C OS=Homo sapiens GN=TMEM106C PE=1 SV=1	558.192	546.917	603.154	749.57	555.011	641.655	569.421	648.745	0.291993	-0.188157	0.534627
Q96JM3	Chromosome alignment-maintaining phosphoprotein 1 OS=Homo sapiens GN=CHAMP1 PE=1 SV=2	671.429	678.581	543.992	566.344	617.996	512.2	631.334	565.514	0.292034	0.158841	0.534566
Q6SJ96	TATA box-binding protein-like protein 2 OS=Homo sapiens GN=TBPL2 PE=2 SV=1	658.88	554.284	515.726	650.856	607.972	650.954	576.297	636.594	0.292089	-0.143561	0.534485
O75923	Dysferlin OS=Homo sapiens GN=DYSF PE=1 SV=1	588.044	593.752	565.629	575.658	666.134	616.239	582.475	619.344	0.292247	-0.0885438	0.534251
Q96HA8	Protein N-terminal glutamine amidohydrolase OS=Homo sapiens GN=WDYHV1 PE=1 SV=2	476.41	569.982	546.462	522.232	844.498	627.08	530.951	664.603	0.292302	-0.323914	0.534169
Q14498	RNA-binding protein 39 OS=Homo sapiens GN=RBM39 PE=1 SV=2	562.613	583.223	553.343	576.506	731.081	596.784	566.393	634.791	0.292501	-0.164478	0.533873
A0A087WUL0	Triokinase/FMN cyclase OS=Homo sapiens GN=TKFC PE=1 SV=1	607.956	573.593	535.707	642.305	707.194	555.487	572.419	634.995	0.292631	-0.149675	0.53368
Q14558	Phosphoribosyl pyrophosphate synthase-associated protein 1 OS=Homo sapiens GN=PRPSAP1 PE=1 SV=2	612.534	588.214	523.228	724.094	619.716	574.341	574.659	639.384	0.2927	-0.153977	0.533578
P31323	cAMP-dependent protein kinase type II-beta regulatory subunit OS=Homo sapiens GN=PRKAR2B PE=1 SV=3	600.94	670.011	626.211	589.672	479.864	633.404	632.387	567.647	0.292768	0.155815	0.533477
Q9UBF2	Coatomer subunit gamma-2 OS=Homo sapiens GN=COPG2 PE=1 SV=1	537.228	680.359	668.533	526.162	556.303	606.67	628.707	563.045	0.29283	0.159137	0.533385
G3V556	6.8 kDa mitochondrial proteolipid OS=Homo sapiens GN=C14orf2 PE=1 SV=1	553.971	630.051	566.464	593.397	619.875	639.462	583.495	617.578	0.292944	-0.0819006	0.533216
O94851	Protein-methionine sulfoxide oxidase MICAL2 OS=Homo sapiens GN=MICAL2 PE=1 SV=1	506.06	579.551	634.834	582.504	643.979	658.033	573.482	628.172	0.293145	-0.131411	0.532918
Q9P0V3	SH3 domain-binding protein 4 OS=Homo sapiens GN=SH3BP4 PE=1 SV=1	408.64	666.99	550.68	560.672	707.212	686.11	542.103	651.331	0.293243	-0.264823	0.532772
Q17RS7	Flap endonuclease GEN homolog 1 OS=Homo sapiens GN=GEN1 PE=1 SV=2	421.693	546.872	545.068	535.272	953.864	582.403	504.544	690.513	0.293277	-0.452687	0.532722
H0YN33	Cyclin-dependent kinase 2-interacting protein (Fragment) OS=Homo sapiens GN=CINP PE=1 SV=1	496.287	725.332	762.701	530.249	403.302	651.367	661.44	528.306	0.293555	0.324236	0.532311
Q8N0V3	Putative ribosome-binding factor A, mitochondrial OS=Homo sapiens GN=RBFA PE=1 SV=3	502.353	595.189	515.833	509.727	803.809	657.521	537.792	657.019	0.293636	-0.288888	0.53219
Q16762	Thiosulfate sulfurtransferase OS=Homo sapiens GN=TST PE=1 SV=4	579.861	652.362	664.022	449.246	620.385	597.554	632.082	555.728	0.293745	0.185731	0.532029
Q5JTD0	Tight junction-associated protein 1 OS=Homo sapiens GN=TJAP1 PE=1 SV=1	497.387	793.966	660.039	442.52	621.711	511.899	650.464	525.376	0.293762	0.308118	0.532005
Q9BV36	Melanophilin OS=Homo sapiens GN=MLPH PE=1 SV=1	395.931	496.331	697.486	600.439	827.303	589.256	529.916	672.333	0.294299	-0.343412	0.531211
Q9Y5Z7	Host cell factor 2 OS=Homo sapiens GN=HCFC2 PE=1 SV=1	553.648	630.24	770.95	532.724	444.641	657.025	651.613	544.797	0.294333	0.258296	0.531161
Q9NVC3	Putative sodium-coupled neutral amino acid transporter 7 OS=Homo sapiens GN=SLC38A7 PE=1 SV=1	506.685	645.982	513.997	590.211	751.48	583.539	555.555	641.743	0.294689	-0.208067	0.530636
Q13907	Isopentenyl-diphosphate Delta-isomerase 1 OS=Homo sapiens GN=IDI1 PE=1 SV=2	442.026	811.141	748.704	443.239	501.796	578.135	667.29	507.724	0.295134	0.394271	0.52998
Q13829	BTB/POZ domain-containing adapter for CUL3-mediated RhoA degradation protein 2 OS=Homo sapiens GN=TNFAIP1 PE=1 SV=1	374.683	610.099	627.227	557.805	740.082	674.058	537.336	657.315	0.295196	-0.290759	0.529889
O14980	Exportin-1 OS=Homo sapiens GN=XPO1 PE=1 SV=1	553.956	620.971	588.567	643.922	594.231	613.475	587.831	617.209	0.295749	-0.0703575	0.529077
P78417	Glutathione S-transferase omega-1 OS=Homo sapiens GN=GSTO1 PE=1 SV=2	587.114	691.163	588.565	519.34	584.581	605.64	622.281	569.854	0.295752	0.126974	0.529073
Q96JG6	Syndetin OS=Homo sapiens GN=VPS50 PE=1 SV=3	529.763	614.963	560.885	551.403	695.155	640.837	568.537	629.132	0.295836	-0.146108	0.528948
Q9Y6D5	Brefeldin A-inhibited guanine nucleotide-exchange protein 2 OS=Homo sapiens GN=ARFGEF2 PE=1 SV=3	549.832	649.299	683.246	517.17	556.043	624.374	627.459	565.862	0.295867	0.149071	0.528903
Q9NRC1	Suppressor of tumorigenicity 7 protein OS=Homo sapiens GN=ST7 PE=1 SV=1	471.251	632.195	509.348	529.314	807.806	629.136	537.598	655.419	0.295931	-0.285888	0.52881
O75874	Isocitrate dehydrogenase [NADP] cytoplasmic OS=Homo sapiens GN=IDH1 PE=1 SV=2	584.96	577.095	595.069	602.497	589.148	669.335	585.708	620.327	0.296016	-0.0828462	0.528684
Q15276	Rab GTPase-binding effector protein 1 OS=Homo sapiens GN=RABEP1 PE=1 SV=2	595.638	586.91	724.457	557.789	505.144	633.894	635.669	565.609	0.296038	0.168469	0.528653
O60216	Double-strand-break repair protein rad21 homolog OS=Homo sapiens GN=RAD21 PE=1 SV=2	580.067	566.359	618.752	592.758	647.596	606.703	588.393	615.686	0.296311	-0.0654143	0.528252
Q92925	SWI/SNF-related matrix-associated actin-dependent regulator of chromatin subfamily D member 2 OS=Homo sapiens GN=SMARCD2 PE=1 SV=3	595.614	641.098	629.814	505.076	582.784	628.164	622.175	572.008	0.296648	0.121285	0.527758
P08047	Transcription factor Sp1 OS=Homo sapiens GN=SP1 PE=1 SV=3	441.386	640.399	1106.28	380.874	323.016	647.249	729.355	450.38	0.296802	0.695479	0.527533
Q9NSB8	Homer protein homolog 2 OS=Homo sapiens GN=HOMER2 PE=1 SV=1	531.609	742.999	632.479	482.347	580.196	583.475	635.696	548.672	0.296872	0.212391	0.527431
Q8TED0	U3 small nucleolar RNA-associated protein 15 homolog OS=Homo sapiens GN=UTP15 PE=1 SV=3	543.419	712.369	683.474	571.555	430.97	643.213	646.421	548.58	0.296995	0.236772	0.527251
Q9H5X1	MIP18 family protein FAM96A OS=Homo sapiens GN=FAM96A PE=1 SV=1	677.388	531.527	724.283	554.494	508.793	620.908	644.399	561.398	0.297078	0.198931	0.527129
P50583	Bis(5'-nucleosyl)-tetraphosphatase [asymmetrical] OS=Homo sapiens GN=NUDT2 PE=1 SV=3	456.848	570.112	623.668	525.3	734.251	679.223	550.209	646.258	0.297195	-0.232131	0.526959
P51159	Ras-related protein Rab-27A OS=Homo sapiens GN=RAB27A PE=1 SV=3	442.348	632.219	599.216	589.248	642.38	690.279	557.927	640.636	0.297296	-0.199427	0.526811
A0A0A0MSA7	Eukaryotic translation initiation factor 4 gamma 3 OS=Homo sapiens GN=EIF4G3 PE=1 SV=1	571.256	631.532	672.865	529.483	641.937	533.826	625.217	568.415	0.297617	0.137413	0.526342
Q9NVR2	Integrator complex subunit 10 OS=Homo sapiens GN=INTS10 PE=1 SV=2	589.946	618.57	739.218	541.353	437.633	670.58	649.244	549.855	0.297697	0.23971	0.526226
P62318	Small nuclear ribonucleoprotein Sm D3 OS=Homo sapiens GN=SNRPD3 PE=1 SV=1	476.146	571.942	570.682	498.772	782.126	685.095	539.59	655.331	0.297713	-0.280361	0.526203
P15923	Transcription factor E2-alpha OS=Homo sapiens GN=TCF3 PE=1 SV=1	759.8	561.329	718.133	652.525	335.302	617.211	679.754	535.013	0.297745	0.34544	0.526156
Q15172	Serine/threonine-protein phosphatase 2A 56 kDa regulatory subunit alpha isoform OS=Homo sapiens GN=PPP2R5A PE=1 SV=1	685.66	638.398	631.405	627.69	415.654	621.967	651.821	555.104	0.298106	0.231719	0.525629
Q9Y3D2	Methionine-R-sulfoxide reductase B2, mitochondrial OS=Homo sapiens GN=MSRB2 PE=1 SV=2	514.092	566.88	574.497	511.686	730.494	695.13	551.823	645.77	0.298394	-0.226814	0.525209
O75182	Paired amphipathic helix protein Sin3b OS=Homo sapiens GN=SIN3B PE=1 SV=2	608.917	533.875	474.34	641.642	843.875	523.013	539.044	669.51	0.298535	-0.312702	0.525005
Q9BV40	Vesicle-associated membrane protein 8 OS=Homo sapiens GN=VAMP8 PE=1 SV=1	758.977	705.093	648.664	706.467	231.458	583.498	704.245	507.141	0.298759	0.47369	0.524678
P04183	Thymidine kinase, cytosolic OS=Homo sapiens GN=TK1 PE=1 SV=2	720.247	312.605	538.33	977.502	608.66	599.071	523.727	728.411	0.298864	-0.475937	0.524527
Q06323	Proteasome activator complex subunit 1 OS=Homo sapiens GN=PSME1 PE=1 SV=1	755.443	541.409	644.671	596.173	574.897	512.745	647.174	561.272	0.298956	0.205456	0.524393
Q9NUD5	Zinc finger CCHC domain-containing protein 3 OS=Homo sapiens GN=ZCCHC3 PE=1 SV=1	1193.7	478.485	720.97	862.929	197.718	267.452	797.718	442.7	0.299025	0.84955	0.524292
O15042	U2 snRNP-associated SURP motif-containing protein OS=Homo sapiens GN=U2SURP PE=1 SV=2	558.413	662.419	679.53	531.288	499.759	652.979	633.454	561.342	0.299165	0.17436	0.524089
Q6PL18	ATPase family AAA domain-containing protein 2 OS=Homo sapiens GN=ATAD2 PE=1 SV=1	553.316	630.25	549.256	619.557	675.884	576.78	577.607	624.074	0.299334	-0.111628	0.523844
Q8NFI3	Cytosolic endo-beta-N-acetylglucosaminidase OS=Homo sapiens GN=ENGASE PE=1 SV=1	600.811	586.112	517.07	566.057	722.21	612.87	567.998	633.713	0.299573	-0.157944	0.523497
Q15257	Serine/threonine-protein phosphatase 2A activator OS=Homo sapiens GN=PPP2R4 PE=1 SV=3	746.494	541.53	716.433	675.248	406.473	561.387	668.152	547.703	0.300234	0.286784	0.52254
A0A0D9SEX9	Zinc finger protein GLIS1 OS=Homo sapiens GN=GLIS1 PE=1 SV=1	445.921	623.274	546.837	509.492	781.606	668.954	538.677	653.35	0.30032	-0.278436	0.522416
Q99726	Zinc transporter 3 OS=Homo sapiens GN=SLC30A3 PE=1 SV=2	435.099	568.452	603.094	496.893	687.714	798.151	535.548	660.919	0.300561	-0.303457	0.522068
Q53T59	HCLS1-binding protein 3 OS=Homo sapiens GN=HS1BP3 PE=1 SV=1	538.62	605.636	538.62	589.378	751.669	575.904	560.959	638.984	0.301025	-0.187885	0.521397
B4DDD6	Drebrin-like protein OS=Homo sapiens GN=DBNL PE=1 SV=1	697.802	602.19	624.55	483.993	680.515	493.15	641.514	552.553	0.301035	0.215368	0.521383
Q9Y576	Ankyrin repeat and SOCS box protein 1 OS=Homo sapiens GN=ASB1 PE=1 SV=1	591.762	609.799	567.402	614.752	585.498	646.071	589.654	615.44	0.301125	-0.0617486	0.521254
Q9H4A6	Golgi phosphoprotein 3 OS=Homo sapiens GN=GOLPH3 PE=1 SV=1	517.756	566.349	484.757	579.391	900.077	551.176	522.954	676.882	0.301268	-0.372219	0.521047
Q5T1V6	Probable ATP-dependent RNA helicase DDX59 OS=Homo sapiens GN=DDX59 PE=1 SV=1	474.456	495.955	548.395	518.714	957.546	599.353	506.269	691.871	0.301544	-0.4506	0.520649
Q15435	Protein phosphatase 1 regulatory subunit 7 OS=Homo sapiens GN=PPP1R7 PE=1 SV=1	599.464	607.674	631.705	547.059	607.25	603.183	612.948	585.83	0.30176	0.0652805	0.520338
Q9BXS9	Solute carrier family 26 member 6 OS=Homo sapiens GN=SLC26A6 PE=1 SV=1	442.899	631.474	549.401	583.657	806.406	572.044	541.258	654.036	0.301806	-0.273053	0.520273
Q15024	Exosome complex component RRP42 OS=Homo sapiens GN=EXOSC7 PE=1 SV=3	596.175	592.471	294.568	561.996	992.641	561.408	494.405	705.348	0.301814	-0.512644	0.52026
P78560	Death domain-containing protein CRADD OS=Homo sapiens GN=CRADD PE=1 SV=1	1151.79	609.34	566.391	729.927	70.4274	559.1	775.841	453.152	0.302837	0.775768	0.518791
O75607	Nucleoplasmin-3 OS=Homo sapiens GN=NPM3 PE=1 SV=3	426.732	596.68	563.71	534.066	852.326	606.244	529.041	664.212	0.302941	-0.328264	0.518643
Q9P0N9	TBC1 domain family member 7 OS=Homo sapiens GN=TBC1D7 PE=1 SV=1	504.431	601.11	580.252	539.64	717.198	647.737	561.931	634.858	0.303001	-0.176042	0.518555
Q8WYA1	Aryl hydrocarbon receptor nuclear translocator-like protein 2 OS=Homo sapiens GN=ARNTL2 PE=1 SV=2	674.377	398.953	584.002	772.543	703.681	551.999	552.444	676.074	0.303064	-0.291353	0.518466
A6NHL2	Tubulin alpha chain-like 3 OS=Homo sapiens GN=TUBAL3 PE=1 SV=2	571.998	626.175	519.267	661.067	683.753	553.639	572.48	632.819	0.303173	-0.144569	0.518309
P15927	Replication protein A 32 kDa subunit OS=Homo sapiens GN=RPA2 PE=1 SV=1	652.336	654.417	639.617	390.804	678.68	534.659	648.79	534.714	0.303355	0.278984	0.518049
Q9Y6R0	Numb-like protein OS=Homo sapiens GN=NUMBL PE=1 SV=1	580.175	565.601	528.034	702.676	740.928	515.565	557.937	653.056	0.303746	-0.227106	0.517489
Q96KC2	ADP-ribosylation factor-like protein 5B OS=Homo sapiens GN=ARL5B PE=1 SV=1	662.841	537.701	940.728	432.979	252.391	769.108	713.757	484.826	0.303752	0.557965	0.517481
O95707	Ribonuclease P protein subunit p29 OS=Homo sapiens GN=POP4 PE=1 SV=2	519.966	589.775	588.343	553.097	718.583	625.316	566.028	632.332	0.304096	-0.159809	0.516989
Q8WWI5	Choline transporter-like protein 1 OS=Homo sapiens GN=SLC44A1 PE=1 SV=1	715.783	578.064	737.548	669.353	337.287	603.035	677.132	536.558	0.304425	0.335701	0.51652
Q8NFH4	Nucleoporin Nup37 OS=Homo sapiens GN=NUP37 PE=1 SV=1	599.838	581.649	558.622	560.48	654.97	651.539	580.036	622.33	0.304837	-0.101536	0.515932
Q3V6T2	Girdin OS=Homo sapiens GN=CCDC88A PE=1 SV=2	603.527	579.236	538.967	612.703	710.336	569.991	573.91	631.01	0.305268	-0.136837	0.515318
Q5T9B7	Adenylate kinase isoenzyme 1 OS=Homo sapiens GN=AK1 PE=1 SV=1	721.74	564.021	649.118	644.263	478.26	578.331	644.96	566.951	0.305286	0.185984	0.515293
Q96CN9	GRIP and coiled-coil domain-containing protein 1 OS=Homo sapiens GN=GCC1 PE=1 SV=1	579.12	517.251	640.334	590.547	641.28	653.659	578.902	628.495	0.305318	-0.118583	0.515248
P56559	ADP-ribosylation factor-like protein 4C OS=Homo sapiens GN=ARL4C PE=1 SV=1	426.543	556.02	616.465	481.089	739.491	764.477	533.009	661.686	0.305642	-0.311986	0.514787
Q9BYG4	Partitioning defective 6 homolog gamma OS=Homo sapiens GN=PARD6G PE=1 SV=1	311.737	604.024	578.129	448.841	891.553	721.564	497.964	687.319	0.305983	-0.46494	0.514303
O95777	U6 snRNA-associated Sm-like protein LSm8 OS=Homo sapiens GN=LSM8 PE=1 SV=3	546.204	640.579	442.638	655.436	799.18	523.996	543.14	659.538	0.306282	-0.28013	0.513879
Q14696	LDLR chaperone MESD OS=Homo sapiens GN=MESDC2 PE=1 SV=2	571.283	674.086	851.698	430.883	265.394	774.325	699.022	490.201	0.306301	0.511966	0.513852
P17987	T-complex protein 1 subunit alpha OS=Homo sapiens GN=TCP1 PE=1 SV=1	562.882	661.903	642.092	504.919	621.911	579.287	622.292	568.706	0.306439	0.12991	0.513656
O43414	ERI1 exoribonuclease 3 OS=Homo sapiens GN=ERI3 PE=1 SV=2	492.142	680.61	778.109	481.783	533.12	593.411	650.287	536.105	0.306649	0.278561	0.513358
Q5VZE5	N-alpha-acetyltransferase 35, NatC auxiliary subunit OS=Homo sapiens GN=NAA35 PE=1 SV=1	532.561	603.105	574.571	547.166	689.044	648.001	570.079	628.07	0.306836	-0.139764	0.513093
P49790	Nuclear pore complex protein Nup153 OS=Homo sapiens GN=NUP153 PE=1 SV=2	696.197	565.903	678.499	656.034	464.13	575.08	646.866	565.081	0.306853	0.195009	0.51307
Q96GA3	Protein LTV1 homolog OS=Homo sapiens GN=LTV1 PE=1 SV=1	605.772	570.563	476.607	688.62	778.459	510.717	550.981	659.265	0.30691	-0.258857	0.512989
P35268	60S ribosomal protein L22 OS=Homo sapiens GN=RPL22 PE=1 SV=2	501.562	663.43	531.027	596.775	658.684	643.389	565.34	632.949	0.306987	-0.162972	0.51288
Q6ZUT1	Uncharacterized protein C11orf57 OS=Homo sapiens GN=C11orf57 PE=1 SV=2	531.462	576.296	468.864	580.501	893.23	549.046	525.541	674.259	0.307049	-0.359501	0.512792
P51665	26S proteasome non-ATPase regulatory subunit 7 OS=Homo sapiens GN=PSMD7 PE=1 SV=2	589.544	601.697	529.907	624.614	704.084	562.826	573.716	630.508	0.307177	-0.136177	0.512611
Q96KR1	Zinc finger RNA-binding protein OS=Homo sapiens GN=ZFR PE=1 SV=2	650.929	571.318	640.609	615.062	573.549	569.049	620.952	585.887	0.307221	0.0838604	0.512549
P48449	Lanosterol synthase OS=Homo sapiens GN=LSS PE=1 SV=1	617.797	600.066	611.072	590.056	576.135	615.494	609.645	593.895	0.307291	0.0377615	0.512451
F8W9L8	PHD finger protein 20-like protein 1 OS=Homo sapiens GN=PHF20L1 PE=1 SV=1	706.739	511.416	436.535	790.731	670.965	560.885	551.563	674.194	0.307363	-0.289636	0.512348
Q9NUL7	Probable ATP-dependent RNA helicase DDX28 OS=Homo sapiens GN=DDX28 PE=1 SV=2	650.969	605.958	694.879	566.512	421.946	670.538	650.602	552.998	0.307752	0.2345	0.511799
Q9NS69	Mitochondrial import receptor subunit TOM22 homolog OS=Homo sapiens GN=TOMM22 PE=1 SV=3	728.757	634.986	585.811	651.782	439.421	587.837	649.852	559.68	0.307778	0.215508	0.511763
Q8N4Q0	Zinc-binding alcohol dehydrogenase domain-containing protein 2 OS=Homo sapiens GN=ZADH2 PE=1 SV=1	461.544	611.608	613.988	565.963	675.075	664.57	562.38	635.203	0.307784	-0.175672	0.511753
Q96LJ7	Dehydrogenase/reductase SDR family member 1 OS=Homo sapiens GN=DHRS1 PE=1 SV=1	634.408	575.647	547.609	650.386	582.511	642.024	585.888	624.974	0.307845	-0.0931711	0.511669
Q8N5W9	Filamin-interacting protein FAM101B OS=Homo sapiens GN=FAM101B PE=1 SV=1	510.738	554.668	410.841	572.631	1024.04	524.102	492.083	706.925	0.308123	-0.522656	0.511276
Q9Y6A9	Signal peptidase complex subunit 1 OS=Homo sapiens GN=SPCS1 PE=1 SV=4	484.388	722.422	761.059	403.461	510.138	656.135	655.956	523.245	0.308274	0.326114	0.511063
Q9Y2L9	Leucine-rich repeat and calponin homology domain-containing protein 1 OS=Homo sapiens GN=LRCH1 PE=1 SV=3	650.791	439.979	579.305	820.736	544.042	662.622	556.692	675.8	0.308578	-0.279718	0.510636
Q99595	Mitochondrial import inner membrane translocase subunit Tim17-A OS=Homo sapiens GN=TIMM17A PE=1 SV=1	544.86	652.851	398.463	632.491	839.017	533.504	532.058	668.337	0.308759	-0.328993	0.51038
P48509	CD151 antigen OS=Homo sapiens GN=CD151 PE=1 SV=3	740.51	415.979	1130.69	663.876	154.624	556.094	762.392	458.198	0.308848	0.734561	0.510256
P30038	Delta-1-pyrroline-5-carboxylate dehydrogenase, mitochondrial OS=Homo sapiens GN=ALDH4A1 PE=1 SV=3	737.105	594.821	579.416	602.023	563.973	542.238	637.114	569.411	0.309088	0.16208	0.509918
Q9Y421	Protein FAM32A OS=Homo sapiens GN=FAM32A PE=1 SV=2	718.631	590.151	845.805	637.643	165.547	679.398	718.196	494.196	0.309381	0.539293	0.509506
O60884	DnaJ homolog subfamily A member 2 OS=Homo sapiens GN=DNAJA2 PE=1 SV=1	669.448	533.263	782.348	563.113	417.184	655.693	661.687	545.33	0.309459	0.279019	0.509397
Q08378	Golgin subfamily A member 3 OS=Homo sapiens GN=GOLGA3 PE=1 SV=2	622.333	541.559	599.702	612.286	639.067	609.719	587.865	620.357	0.309604	-0.0776149	0.509194
A0A087WZ62	Uncharacterized protein OS=Homo sapiens PE=4 SV=1	635.22	491.08	597.555	701.662	561.126	673.293	574.618	645.36	0.309703	-0.167501	0.509055
P53990	IST1 homolog OS=Homo sapiens GN=IST1 PE=1 SV=1	565.655	594.782	547.133	564.556	718.877	609.075	569.19	630.836	0.309793	-0.148354	0.508928
O96017	Serine/threonine-protein kinase Chk2 OS=Homo sapiens GN=CHEK2 PE=1 SV=1	639.677	523.923	572.104	706.303	633.746	573.675	578.568	637.908	0.310028	-0.140862	0.508599
Q13501	Sequestosome-1 OS=Homo sapiens GN=SQSTM1 PE=1 SV=1	584.279	480.024	454.072	667.551	978.7	469.235	506.125	705.162	0.310158	-0.478461	0.508416
P52739	Zinc finger protein 131 OS=Homo sapiens GN=ZNF131 PE=1 SV=2	444.525	757.278	792.833	366.095	639.1	509.143	664.879	504.779	0.310369	0.397439	0.508122
A8MT69	Centromere protein X OS=Homo sapiens GN=STRA13 PE=1 SV=1	555.371	680.992	328.67	657.665	843.204	538.78	521.678	679.883	0.31049	-0.382129	0.507952
Q9BY78	RING finger protein 26 OS=Homo sapiens GN=RNF26 PE=2 SV=1	495.135	712.403	406.16	636.461	730.572	614.221	537.899	660.418	0.310705	-0.296043	0.507651
Q86YT6	E3 ubiquitin-protein ligase MIB1 OS=Homo sapiens GN=MIB1 PE=1 SV=1	710.316	621.095	650.79	569.269	383.088	680.747	660.734	544.368	0.310928	0.279486	0.50734
Q9NUQ7	Ufm1-specific protease 2 OS=Homo sapiens GN=UFSP2 PE=1 SV=3	422.809	603.527	616.845	532.333	680.332	731.206	547.727	647.957	0.310929	-0.242442	0.507339
Q9Y546	Leucine-rich repeat-containing protein 42 OS=Homo sapiens GN=LRRC42 PE=1 SV=1	417.226	737.931	984.253	394.003	270.054	728.658	713.137	464.238	0.310962	0.619313	0.507293
Q8TF68	Zinc finger protein 384 OS=Homo sapiens GN=ZNF384 PE=1 SV=2	701.205	643.787	588.885	680.303	497.628	514.781	644.625	564.238	0.311014	0.192158	0.50722
Q8TBA6	Golgin subfamily A member 5 OS=Homo sapiens GN=GOLGA5 PE=1 SV=3	550.584	644.224	673.773	523.014	591.606	597.029	622.861	570.549	0.311749	0.126557	0.506195
P51636	Caveolin-2 OS=Homo sapiens GN=CAV2 PE=1 SV=2	663.387	566.211	660.211	634.463	530.829	572.276	629.937	579.189	0.311772	0.121171	0.506163
O00567	Nucleolar protein 56 OS=Homo sapiens GN=NOP56 PE=1 SV=4	624.175	523.011	583.427	579.745	696.519	612.863	576.871	629.709	0.311813	-0.126437	0.506105
P11413	Glucose-6-phosphate 1-dehydrogenase OS=Homo sapiens GN=G6PD PE=1 SV=4	612.439	622.662	589.743	600.181	581.701	601.632	608.281	594.505	0.311867	0.0330502	0.506031
A0A087X266	Transmembrane protein 120A OS=Homo sapiens GN=TMEM120A PE=1 SV=1	750.486	569.222	610.53	631.394	554.042	513.997	643.413	566.477	0.311932	0.183726	0.505941
O15530	3-phosphoinositide-dependent protein kinase 1 OS=Homo sapiens GN=PDPK1 PE=1 SV=1	472.135	682.492	443.005	600.981	826.423	559.444	532.544	662.282	0.312147	-0.314545	0.505641
Q9BY50	Signal peptidase complex catalytic subunit SEC11C OS=Homo sapiens GN=SEC11C PE=1 SV=3	668.398	442.072	560.97	816.151	546.038	664.09	557.146	675.426	0.31219	-0.277742	0.505581
P30085	UMP-CMP kinase OS=Homo sapiens GN=CMPK1 PE=1 SV=3	657.824	558.399	423.36	775.032	739.013	504.46	546.528	672.835	0.312629	-0.299958	0.50497
Q9BXK1	Krueppel-like factor 16 OS=Homo sapiens GN=KLF16 PE=1 SV=1	200.656	1057.58	994.541	228.457	506.803	414.292	750.927	383.184	0.312754	0.970636	0.504798
Q6NUK1	Calcium-binding mitochondrial carrier protein SCaMC-1 OS=Homo sapiens GN=SLC25A24 PE=1 SV=2	677.568	618.599	664.938	496.911	434.485	704.068	653.701	545.155	0.313074	0.261966	0.504353
Q9NXK8	F-box/LRR-repeat protein 12 OS=Homo sapiens GN=FBXL12 PE=1 SV=1	548.432	579.649	619.96	640.007	567.875	667.713	582.68	625.198	0.313139	-0.101609	0.504262
Q9HCC0	Methylcrotonoyl-CoA carboxylase beta chain, mitochondrial OS=Homo sapiens GN=MCCC2 PE=1 SV=1	559.705	597.27	591.502	566.57	650.429	636.14	582.826	617.713	0.31321	-0.0838722	0.504165
O77932	Decapping and exoribonuclease protein OS=Homo sapiens GN=DXO PE=2 SV=2	482.892	643.161	577.362	610.083	596.626	692.916	567.805	633.208	0.313243	-0.157284	0.504119
P17252	Protein kinase C alpha type OS=Homo sapiens GN=PRKCA PE=1 SV=4	608.514	605.746	637.465	604.018	542.136	614.44	617.242	586.865	0.313353	0.072808	0.503966
Q86W42	THO complex subunit 6 homolog OS=Homo sapiens GN=THOC6 PE=1 SV=1	582.689	711.037	754.809	596.979	272.426	679.598	682.845	516.334	0.31361	0.403252	0.50361
Q86SZ2	Trafficking protein particle complex subunit 6B OS=Homo sapiens GN=TRAPPC6B PE=1 SV=1	474.033	613.611	598.958	548.413	694.56	659.272	562.201	634.082	0.31384	-0.173584	0.503291
Q12792	Twinfilin-1 OS=Homo sapiens GN=TWF1 PE=1 SV=3	640.409	607.757	626.725	613.705	514.309	614.339	624.964	580.784	0.313955	0.10577	0.503133
Q96PD2	Discoidin, CUB and LCCL domain-containing protein 2 OS=Homo sapiens GN=DCBLD2 PE=1 SV=1	599.958	586.836	568.837	677.615	621.59	574.878	585.21	624.694	0.313996	-0.0941958	0.503076
P49257	Protein ERGIC-53 OS=Homo sapiens GN=LMAN1 PE=1 SV=2	730.613	632.624	545.806	566.657	581.508	547.972	636.347	565.379	0.314078	0.170596	0.502962
P01112	GTPase HRas OS=Homo sapiens GN=HRAS PE=1 SV=1	680.309	513.021	524.798	708.049	603.393	629.607	572.71	647.016	0.314105	-0.175998	0.502926
Q9GZT6	Coiled-coil domain-containing protein 90B, mitochondrial OS=Homo sapiens GN=CCDC90B PE=1 SV=2	600.127	642.006	684.138	605.855	439.998	636.144	642.09	560.666	0.314215	0.195635	0.502773
I3L3H0	Phosphatidylcholine transfer protein OS=Homo sapiens GN=PCTP PE=1 SV=1	772.274	634.55	794.031	688.522	102.928	653.895	733.618	481.781	0.314325	0.606651	0.502621
P42226	Signal transducer and activator of transcription 6 OS=Homo sapiens GN=STAT6 PE=1 SV=1	498.808	631.562	583.495	572.674	658.242	648.888	571.288	626.601	0.314508	-0.133329	0.502368
O60343	TBC1 domain family member 4 OS=Homo sapiens GN=TBC1D4 PE=1 SV=2	601.837	486.969	637.006	700.406	571.597	658.328	575.271	643.444	0.314626	-0.161573	0.502206
Q86VY9	Transmembrane protein 200A OS=Homo sapiens GN=TMEM200A PE=1 SV=1	469.151	577.668	519.601	661.851	896.976	483.744	522.14	680.857	0.314693	-0.382916	0.502112
Q9BV38	WD repeat-containing protein 18 OS=Homo sapiens GN=WDR18 PE=1 SV=2	624.751	562.556	759.436	627.022	456.678	593.674	648.914	559.125	0.314795	0.214857	0.501972
Q86YS6	Ras-related protein Rab-43 OS=Homo sapiens GN=RAB43 PE=1 SV=1	534.852	647.6	534.616	580.137	671.069	626.497	572.356	625.901	0.315058	-0.129022	0.50161
Q9BPZ3	Polyadenylate-binding protein-interacting protein 2 OS=Homo sapiens GN=PAIP2 PE=1 SV=1	721.214	509.848	906.864	608.097	217.615	678.038	712.642	501.25	0.316331	0.507646	0.499858
Q5VSY0	G kinase-anchoring protein 1 OS=Homo sapiens GN=GKAP1 PE=1 SV=2	898.991	567.217	717.845	679.732	149.627	651.567	728.018	493.642	0.316691	0.560509	0.499364
O14867	Transcription regulator protein BACH1 OS=Homo sapiens GN=BACH1 PE=1 SV=2	548.646	579.249	583.885	599.279	722.982	572.697	570.594	631.653	0.316879	-0.146668	0.499106
H7C561	Splicing factor 1 (Fragment) OS=Homo sapiens GN=SF1 PE=1 SV=6	891.324	486.293	911.895	793.088	73.7055	539.48	763.171	468.758	0.317114	0.703163	0.498785
Q8N1Q1	Carbonic anhydrase 13 OS=Homo sapiens GN=CA13 PE=1 SV=1	678.2	463.307	513.106	860.473	543.533	646.593	551.538	683.533	0.317429	-0.309552	0.498353
O94811	Tubulin polymerization-promoting protein OS=Homo sapiens GN=TPPP PE=1 SV=1	584.979	575.289	535.966	607.802	746.421	561.405	565.411	638.543	0.317707	-0.175482	0.497973
Q9Y617	Phosphoserine aminotransferase OS=Homo sapiens GN=PSAT1 PE=1 SV=2	697.829	638.621	549.504	565.153	591.833	558.887	628.652	571.957	0.317866	0.136353	0.497756
Q92538	Golgi-specific brefeldin A-resistance guanine nucleotide exchange factor 1 OS=Homo sapiens GN=GBF1 PE=1 SV=2	675.523	598.454	608.02	644.054	561.086	536.406	627.332	580.515	0.317908	0.111896	0.497698
F8WCT1	ADP-ribosylation factor-like protein 6-interacting protein 4 OS=Homo sapiens GN=ARL6IP4 PE=1 SV=1	611.661	498.309	432.334	751.796	923.521	434.294	514.101	703.204	0.317935	-0.45189	0.497661
Q6UWJ1	Transmembrane and coiled-coil domain-containing protein 3 OS=Homo sapiens GN=TMCO3 PE=2 SV=1	1188.09	469.877	656.026	685.378	149.47	549.957	771.332	461.602	0.31795	0.740702	0.497641
E7EX17	Eukaryotic translation initiation factor 4B OS=Homo sapiens GN=EIF4B PE=1 SV=1	997.219	507.113	693.383	761.822	247.709	483.237	732.572	497.589	0.317961	0.558014	0.497627
Q03001	Dystonin OS=Homo sapiens GN=DST PE=1 SV=4	643.51	584.005	613.927	591.579	578.863	602.806	613.814	591.083	0.31801	0.0544421	0.497559
H7C1Z7	Carboxy-terminal domain RNA polymerase II polypeptide A small phosphatase 1 (Fragment) OS=Homo sapiens GN=CTDSP1 PE=1 SV=1	557.094	609.563	562.832	702.372	551.54	650.881	576.496	634.931	0.318066	-0.139288	0.497482
P13284	Gamma-interferon-inducible lysosomal thiol reductase OS=Homo sapiens GN=IFI30 PE=1 SV=3	563.593	612.855	979.196	486.456	188.882	757.333	718.548	477.557	0.318166	0.589411	0.497347
Q9Y2G3	Probable phospholipid-transporting ATPase IF OS=Homo sapiens GN=ATP11B PE=1 SV=2	615.521	566.533	517.526	681.824	720.259	530.229	566.526	644.104	0.318239	-0.18515	0.497247
Q9H7B4	Histone-lysine N-methyltransferase SMYD3 OS=Homo sapiens GN=SMYD3 PE=1 SV=4	758.963	621.507	659.844	678.91	315.087	606.953	680.105	533.65	0.3189	0.349862	0.496346
Q9HC77	Centromere protein J OS=Homo sapiens GN=CENPJ PE=1 SV=2	618.821	681.684	606.193	657.154	482.056	565.844	635.566	568.351	0.319012	0.161259	0.496193
Q13884	Beta-1-syntrophin OS=Homo sapiens GN=SNTB1 PE=1 SV=3	814.262	538.94	855.273	658.345	107.686	684.06	736.159	483.364	0.319061	0.606907	0.496126
P04075	Fructose-bisphosphate aldolase A OS=Homo sapiens GN=ALDOA PE=1 SV=2	676.926	545.947	697.192	604.538	488.547	613.995	640.022	569.026	0.319153	0.169625	0.496001
Q96CS2	HAUS augmin-like complex subunit 1 OS=Homo sapiens GN=HAUS1 PE=1 SV=1	553.639	569.507	543.906	534.631	764.677	630.519	555.684	643.276	0.319192	-0.211172	0.495948
Q9NYV4	Cyclin-dependent kinase 12 OS=Homo sapiens GN=CDK12 PE=1 SV=2	607.132	579.988	820.79	589.294	361.893	656.077	669.303	535.755	0.319385	0.321087	0.495686
Q5VWJ9	Sorting nexin-30 OS=Homo sapiens GN=SNX30 PE=1 SV=1	574.416	580.349	562.35	609.909	717.664	566.355	572.372	631.31	0.319812	-0.141395	0.495105
Q9H116	GDNF-inducible zinc finger protein 1 OS=Homo sapiens GN=GZF1 PE=1 SV=1	791.54	563.206	795.728	709.425	187.183	613.469	716.825	503.359	0.31984	0.510033	0.495067
Q16644	MAP kinase-activated protein kinase 3 OS=Homo sapiens GN=MAPKAPK3 PE=1 SV=1	738.415	582.869	614.005	657.067	485.107	558.76	645.096	566.978	0.319988	0.186222	0.494867
P40121	Macrophage-capping protein OS=Homo sapiens GN=CAPG PE=1 SV=2	545.99	505.742	657.02	591.689	604.275	721.445	569.584	639.137	0.32014	-0.166215	0.49466
Q8NH93	Olfactory receptor 1L3 OS=Homo sapiens GN=OR1L3 PE=2 SV=1	517.116	641.122	560.415	604.38	587.163	694.92	572.884	628.821	0.320919	-0.134405	0.493605
Q9UHD8	Septin-9 OS=Homo sapiens GN=SEPT9 PE=1 SV=2	768.519	587.654	592.788	646.579	478.281	562.031	649.654	562.297	0.321066	0.208339	0.493406
P26599	Polypyrimidine tract-binding protein 1 OS=Homo sapiens GN=PTBP1 PE=1 SV=1	653.15	547.411	548.084	654.422	632.731	600.54	582.882	629.231	0.321168	-0.110387	0.493268
Q9H501	ESF1 homolog OS=Homo sapiens GN=ESF1 PE=1 SV=1	810.182	541.235	658.622	661.505	403.287	576.143	670.013	546.978	0.321219	0.292706	0.493199
Q96TA1	Niban-like protein 1 OS=Homo sapiens GN=FAM129B PE=1 SV=3	601.834	635.748	623.409	582.045	527.611	632.601	620.33	580.753	0.321268	0.0951127	0.493132
Q71RC2	La-related protein 4 OS=Homo sapiens GN=LARP4 PE=1 SV=3	830.783	539.128	670.922	698.769	381.862	538.063	680.278	539.565	0.321674	0.334328	0.492584
Q9HCG8	Pre-mRNA-splicing factor CWC22 homolog OS=Homo sapiens GN=CWC22 PE=1 SV=3	534.159	646.934	709.262	533.761	567.038	589.284	630.118	563.361	0.321906	0.161563	0.49227
R4GMX8	Ran-binding protein 10 OS=Homo sapiens GN=RANBP10 PE=1 SV=1	541.539	623.02	774.265	504.313	484.882	653.94	646.274	547.712	0.322015	0.23873	0.492124
Q9UBH6	Xenotropic and polytropic retrovirus receptor 1 OS=Homo sapiens GN=XPR1 PE=1 SV=1	472.837	634.769	595.743	616.703	594.872	689.848	567.783	633.808	0.322214	-0.158706	0.491856
Q16831	Uridine phosphorylase 1 OS=Homo sapiens GN=UPP1 PE=1 SV=1	544.791	626.308	586.084	618.32	629.097	601.746	585.727	616.388	0.322258	-0.0736086	0.491797
O15091	Mitochondrial ribonuclease P protein 3 OS=Homo sapiens GN=KIAA0391 PE=1 SV=2	509.934	572.998	515.306	514.819	853.601	620.225	532.746	662.882	0.322289	-0.315303	0.491755
Q9NVA1	Ubiquinol-cytochrome-c reductase complex assembly factor 1 OS=Homo sapiens GN=UQCC1 PE=1 SV=3	556.749	560.847	985.838	599.427	306.998	602.052	701.145	502.826	0.322526	0.479654	0.491436
Q6FIF0	AN1-type zinc finger protein 6 OS=Homo sapiens GN=ZFAND6 PE=1 SV=2	797.077	487.009	937.244	738.199	136.699	580.518	740.443	485.139	0.322826	0.609992	0.491032
O00762	Ubiquitin-conjugating enzyme E2 C OS=Homo sapiens GN=UBE2C PE=1 SV=1	533.603	677.899	362.231	671.127	851.932	507.425	524.578	676.828	0.322889	-0.367633	0.490947
Q9BZ95	Histone-lysine N-methyltransferase NSD3 OS=Homo sapiens GN=WHSC1L1 PE=1 SV=1	517.105	640.729	546.744	581.882	707.631	598.491	568.192	629.335	0.323021	-0.147448	0.490769
B4DP31	Phosphoribosyl pyrophosphate synthase-associated protein 1 OS=Homo sapiens GN=PRPSAP1 PE=1 SV=1	653.406	544.819	501.06	785.176	591.577	592.504	566.428	656.419	0.323382	-0.212724	0.490284
Q96LB3	Intraflagellar transport protein 74 homolog OS=Homo sapiens GN=IFT74 PE=1 SV=1	659.203	611.241	638.643	655.362	484.362	577.16	636.362	572.295	0.323464	0.15309	0.490174
O75436	Vacuolar protein sorting-associated protein 26A OS=Homo sapiens GN=VPS26A PE=1 SV=2	555.905	667.168	637.495	570.931	552.132	606.279	620.189	576.447	0.3243	0.10552	0.489054
O75937	DnaJ homolog subfamily C member 8 OS=Homo sapiens GN=DNAJC8 PE=1 SV=2	769.861	560.814	650.186	638.967	409.015	612.819	660.287	553.6	0.324417	0.254248	0.488897
Q9H2Y7	Zinc finger protein 106 OS=Homo sapiens GN=ZNF106 PE=1 SV=1	511.459	552.694	563.964	584.883	835.674	553.737	542.706	658.098	0.324434	-0.278132	0.488873
P07858	Cathepsin B OS=Homo sapiens GN=CTSB PE=1 SV=3	464.16	700.266	839.663	373.653	482.15	672.935	668.03	509.58	0.324514	0.390604	0.488766
Q9BVP2	Guanine nucleotide-binding protein-like 3 OS=Homo sapiens GN=GNL3 PE=1 SV=2	524.297	662.533	729.772	484.005	521.605	646.959	638.867	550.856	0.324693	0.21384	0.488527
Q15526	Surfeit locus protein 1 OS=Homo sapiens GN=SURF1 PE=1 SV=1	503.753	605.848	544.755	510.765	751.058	667.796	551.452	643.206	0.325039	-0.222047	0.488065
Q9HCJ5	Zinc finger SWIM domain-containing protein 6 OS=Homo sapiens GN=ZSWIM6 PE=1 SV=2	537.414	569.903	477.913	517.704	878.372	608.343	528.41	668.139	0.325198	-0.338491	0.487852
Q53S58	Transmembrane protein 177 OS=Homo sapiens GN=TMEM177 PE=2 SV=1	622.914	582.693	516.917	577.262	702.653	607.527	574.175	629.147	0.325267	-0.131908	0.48776
P08779	Keratin, type I cytoskeletal 16 OS=Homo sapiens GN=KRT16 PE=1 SV=4	561.109	640.141	668.779	541.562	541.914	635.666	623.343	573.047	0.32549	0.121372	0.487462
Q9H2P0	Activity-dependent neuroprotector homeobox protein OS=Homo sapiens GN=ADNP PE=1 SV=1	676.6	609.906	647.015	674.322	463.4	559.881	644.507	565.868	0.325734	0.187731	0.487137
P14618	Pyruvate kinase PKM OS=Homo sapiens GN=PKM PE=1 SV=4	544.769	598.641	588.41	553.741	658.099	654.615	577.273	622.152	0.325749	-0.108012	0.487117
Q14974	Importin subunit beta-1 OS=Homo sapiens GN=KPNB1 PE=1 SV=2	574.486	644.626	618.876	567.955	611.377	574.49	612.662	584.607	0.325791	0.0676241	0.487061
Q15397	Pumilio domain-containing protein KIAA0020 OS=Homo sapiens GN=KIAA0020 PE=1 SV=3	526.015	629.005	578.461	574.77	654.984	632.542	577.827	620.765	0.325954	-0.103409	0.486843
Q14CS0	UBX domain-containing protein 2B OS=Homo sapiens GN=UBXN2B PE=1 SV=1	687.894	659.818	573.841	528.982	678.042	452.535	640.518	553.186	0.326084	0.211473	0.486671
P29590	Protein PML OS=Homo sapiens GN=PML PE=1 SV=3	705.669	625.441	652.265	636.364	372.33	635.478	661.125	548.057	0.326182	0.270595	0.48654
Q8IWP9	Coiled-coil domain-containing protein 28A OS=Homo sapiens GN=CCDC28A PE=1 SV=1	704.719	581.611	911.08	716.651	113.098	625.58	732.47	485.11	0.326232	0.594458	0.486474
A0A0C4DG89	Probable ATP-dependent RNA helicase DDX46 OS=Homo sapiens GN=DDX46 PE=1 SV=1	640.36	542.645	567.189	688.412	621.402	583.004	583.398	630.939	0.326516	-0.113022	0.486095
Q5VSL9	Striatin-interacting protein 1 OS=Homo sapiens GN=STRIP1 PE=1 SV=1	666.774	630.866	620.051	630.338	456.375	616.035	639.23	567.583	0.326666	0.171505	0.485897
Q96MH6	Transmembrane protein 68 OS=Homo sapiens GN=TMEM68 PE=2 SV=2	443.988	663.012	551.019	550.323	666.563	708.154	552.673	641.68	0.327168	-0.215428	0.48523
J3QLP7	Protein UBBP4 OS=Homo sapiens GN=UBBP4 PE=1 SV=1	649.794	635.016	632.157	542.947	673.812	450.923	638.989	555.894	0.327297	0.200981	0.485058
P21399	Cytoplasmic aconitate hydratase OS=Homo sapiens GN=ACO1 PE=1 SV=3	740.023	529.979	713.319	639.425	413.322	607.095	661.107	553.281	0.327361	0.256872	0.484972
Q13488	V-type proton ATPase 116 kDa subunit a isoform 3 OS=Homo sapiens GN=TCIRG1 PE=1 SV=3	550	632.697	543.566	594.019	690.011	588.656	575.421	624.229	0.327477	-0.117457	0.48482
Q9NVH0	Exonuclease 3'-5' domain-containing protein 2 OS=Homo sapiens GN=EXD2 PE=1 SV=2	551.464	642.655	671.088	525.12	583.737	607.781	621.736	572.213	0.327694	0.119749	0.484531
P62906	60S ribosomal protein L10a OS=Homo sapiens GN=RPL10A PE=1 SV=2	548.047	530.961	554.185	548.543	829.364	591.503	544.397	656.47	0.3278	-0.270069	0.484392
Q3KQV9	UDP-N-acetylhexosamine pyrophosphorylase-like protein 1 OS=Homo sapiens GN=UAP1L1 PE=1 SV=2	634.462	541.795	578.155	639.127	658.45	578.064	584.804	625.213	0.32799	-0.0963951	0.48414
E9PPM1	Tumor protein p53-inducible protein 11 OS=Homo sapiens GN=TP53I11 PE=1 SV=1	657.055	546.827	517.714	722.04	556.837	657.189	573.865	645.355	0.328162	-0.169382	0.483911
A0A0C4DH03	Rho-related GTP-binding protein RhoQ OS=Homo sapiens GN=RHOQ PE=1 SV=1	404.586	606.926	1351.99	280.6	93.3439	788.678	787.833	387.541	0.32851	1.02354	0.483451
P51617	Interleukin-1 receptor-associated kinase 1 OS=Homo sapiens GN=IRAK1 PE=1 SV=2	596.954	607.855	670.499	571.504	516.894	641.16	625.103	576.519	0.328519	0.116725	0.48344
O00221	NF-kappa-B inhibitor epsilon OS=Homo sapiens GN=NFKBIE PE=1 SV=3	646.774	524.907	539.836	760.925	629.807	560.223	570.505	650.318	0.328775	-0.188906	0.483102
O43324	Eukaryotic translation elongation factor 1 epsilon-1 OS=Homo sapiens GN=EEF1E1 PE=1 SV=1	486.781	770.739	692.826	457.901	478.841	657.28	650.115	531.341	0.328779	0.291057	0.483096
Q14934	Nuclear factor of activated T-cells, cytoplasmic 4 OS=Homo sapiens GN=NFATC4 PE=1 SV=2	501.633	594.693	551.215	529.159	788.459	621.417	549.18	646.345	0.329391	-0.235024	0.482288
O15162	Phospholipid scramblase 1 OS=Homo sapiens GN=PLSCR1 PE=1 SV=1	530.973	676.456	721.957	393.977	651.175	564.937	643.129	536.696	0.329454	0.261002	0.482206
P02462	Collagen alpha-1(IV) chain OS=Homo sapiens GN=COL4A1 PE=1 SV=3	420.905	765.845	817.051	473.659	552.323	501.901	667.934	509.294	0.32959	0.391205	0.482026
Q9ULH0	Kinase D-interacting substrate of 220 kDa OS=Homo sapiens GN=KIDINS220 PE=1 SV=3	523.414	629.009	573.716	580.761	681.593	606.649	575.38	623.001	0.329626	-0.11472	0.481978
P63218	Guanine nucleotide-binding protein G(I)/G(S)/G(O) subunit gamma-5 OS=Homo sapiens GN=GNG5 PE=1 SV=3	971.722	524.341	805.886	834.776	56.1707	512.91	767.317	467.952	0.329663	0.71346	0.48193
Q9BPW8	Protein NipSnap homolog 1 OS=Homo sapiens GN=NIPSNAP1 PE=1 SV=1	724.321	606.328	584.067	602.249	625.733	468.749	638.239	565.577	0.329935	0.174372	0.481572
Q96B26	Exosome complex component RRP43 OS=Homo sapiens GN=EXOSC8 PE=1 SV=1	581.354	634.142	663.173	486.453	569.783	643.91	626.223	566.715	0.330023	0.144053	0.481456
Q5QJE6	Deoxynucleotidyltransferase terminal-interacting protein 2 OS=Homo sapiens GN=DNTTIP2 PE=1 SV=2	718.466	563.772	620.998	624.595	555.138	545.259	634.412	574.997	0.330117	0.141865	0.481332
O14639	Actin-binding LIM protein 1 OS=Homo sapiens GN=ABLIM1 PE=1 SV=3	693.223	638.242	577.977	525.087	673.512	477.555	636.481	558.718	0.330587	0.187996	0.480714
Q99720	Sigma non-opioid intracellular receptor 1 OS=Homo sapiens GN=SIGMAR1 PE=1 SV=1	470.809	630.634	531.106	497.52	684.483	766.86	544.183	649.621	0.331013	-0.255506	0.480156
Q9HBD4	SMARCA4 isoform 2 OS=Homo sapiens GN=SMARCA4 PE=1 SV=1	587.699	639.846	653.834	554.483	507.002	653.191	627.126	571.559	0.331203	0.133855	0.479906
Q96JM7	Lethal(3)malignant brain tumor-like protein 3 OS=Homo sapiens GN=L3MBTL3 PE=1 SV=2	470.911	613.168	548.292	525.128	801.21	621.457	544.124	649.265	0.331281	-0.254873	0.479804
O94762	ATP-dependent DNA helicase Q5 OS=Homo sapiens GN=RECQL5 PE=1 SV=2	519.227	800.725	616.101	420.366	553.377	621.216	645.351	531.653	0.331303	0.279599	0.479775
P35813	Protein phosphatase 1A OS=Homo sapiens GN=PPM1A PE=1 SV=1	579.451	611.928	649.507	557.267	613.943	582.871	613.629	584.694	0.331317	0.0696854	0.479757
P82921	28S ribosomal protein S21, mitochondrial OS=Homo sapiens GN=MRPS21 PE=1 SV=2	661.772	544.432	508.322	692.478	683.872	552.612	571.509	642.988	0.331654	-0.170015	0.479314
P31040	Succinate dehydrogenase [ubiquinone] flavoprotein subunit, mitochondrial OS=Homo sapiens GN=SDHA PE=1 SV=2	635.176	561.556	735.845	585.489	457.762	642.688	644.192	561.98	0.331672	0.196973	0.479291
O43657	Tetraspanin-6 OS=Homo sapiens GN=TSPAN6 PE=1 SV=1	421.011	720.489	897.838	331.774	681.257	446.752	679.78	486.595	0.331694	0.482347	0.479262
Q92600	Cell differentiation protein RCD1 homolog OS=Homo sapiens GN=RQCD1 PE=1 SV=1	362.452	1014.63	709.548	264.716	599.986	486.09	695.542	450.264	0.331711	0.627366	0.47924
Q9BSH4	Translational activator of cytochrome c oxidase 1 OS=Homo sapiens GN=TACO1 PE=1 SV=1	605.707	603.342	688.308	602.37	482.539	630.9	632.452	571.936	0.331818	0.145102	0.4791
P15104	Glutamine synthetase OS=Homo sapiens GN=GLUL PE=1 SV=4	335.3	636.091	515.745	502.243	590.724	1007.28	495.712	700.081	0.331943	-0.49802	0.478936
Q13637	Ras-related protein Rab-32 OS=Homo sapiens GN=RAB32 PE=1 SV=3	504.44	637.574	585.254	608.131	613.541	653.449	575.756	625.041	0.332185	-0.118493	0.478619
Q92558	Wiskott-Aldrich syndrome protein family member 1 OS=Homo sapiens GN=WASF1 PE=1 SV=1	441.496	602.475	612.655	525.221	674.08	731.172	552.209	643.491	0.332286	-0.220707	0.478489
P35222	Catenin beta-1 OS=Homo sapiens GN=CTNNB1 PE=1 SV=1	546.536	664.052	689.531	521.916	500.772	658.357	633.373	560.348	0.332416	0.176732	0.478318
Q9UNZ2	NSFL1 cofactor p47 OS=Homo sapiens GN=NSFL1C PE=1 SV=2	652.081	591.988	603.998	606.977	603.532	556.113	616.022	588.874	0.332842	0.0650236	0.477763
D6W601	HCG22695, isoform CRA_a OS=Homo sapiens GN=ADAT3 PE=1 SV=1	821.196	476.164	953.636	766.077	99.578	569.917	750.332	478.524	0.332884	0.648938	0.477707
Q9NXX6	Non-structural maintenance of chromosomes element 4 homolog A OS=Homo sapiens GN=NSMCE4A PE=1 SV=2	592.593	609.424	514.423	679.422	687.919	539.931	572.146	635.757	0.333011	-0.152092	0.477541
Q96P16	Regulation of nuclear pre-mRNA domain-containing protein 1A OS=Homo sapiens GN=RPRD1A PE=1 SV=1	686.772	576.556	629.048	474.216	639.792	582.707	630.792	565.572	0.333328	0.157454	0.477129
O15438	Canalicular multispecific organic anion transporter 2 OS=Homo sapiens GN=ABCC3 PE=1 SV=3	502.714	531.977	594.393	487.939	785.738	687.679	543.028	653.785	0.333473	-0.267791	0.47694
O43747	AP-1 complex subunit gamma-1 OS=Homo sapiens GN=AP1G1 PE=1 SV=5	574.006	654.167	634.442	502.637	632.837	576.24	620.872	570.571	0.33396	0.121888	0.476305
Q9HA38	Zinc finger matrin-type protein 3 OS=Homo sapiens GN=ZMAT3 PE=1 SV=1	593.945	573.397	770.495	646.782	503.198	532.395	645.946	560.791	0.334036	0.203948	0.476207
Q9Y2K7	Lysine-specific demethylase 2A OS=Homo sapiens GN=KDM2A PE=1 SV=3	530.861	647.309	529.699	559.716	681.927	640.959	569.29	627.534	0.334076	-0.14053	0.476154
E9PEB9	Dystonin OS=Homo sapiens GN=DST PE=1 SV=3	643.609	583.607	612.852	590.734	581.771	601.909	613.356	591.472	0.334207	0.0524166	0.475984
O43639	Cytoplasmic protein NCK2 OS=Homo sapiens GN=NCK2 PE=1 SV=2	516.068	569.409	620.755	557.927	716.561	617.592	568.744	630.693	0.33427	-0.149159	0.475903
P04424	Argininosuccinate lyase OS=Homo sapiens GN=ASL PE=1 SV=4	557.838	647.25	690.693	479.489	540.786	658.046	631.927	559.44	0.334299	0.175774	0.475865
Q3MIP1	Inositol 1,4,5-trisphosphate receptor-interacting protein-like 2 OS=Homo sapiens GN=ITPRIPL2 PE=1 SV=1	475.065	626.669	577.878	538.703	714.972	650.738	559.871	634.804	0.334615	-0.181218	0.475455
Q96QT4	Transient receptor potential cation channel subfamily M member 7 OS=Homo sapiens GN=TRPM7 PE=1 SV=1	575.261	623.863	570.697	642.016	612.485	590.101	589.94	614.867	0.334739	-0.0597072	0.475294
P41162	ETS translocation variant 3 OS=Homo sapiens GN=ETV3 PE=1 SV=2	379.28	680.558	532.336	539.899	803.256	631.272	530.725	658.143	0.335584	-0.310437	0.474198
P04114	Apolipoprotein B-100 OS=Homo sapiens GN=APOB PE=1 SV=2	610.412	607.656	722.268	611.876	423.655	640.07	646.778	558.533	0.335622	0.211628	0.47415
Q7Z388	Probable C-mannosyltransferase DPY19L4 OS=Homo sapiens GN=DPY19L4 PE=1 SV=1	601.306	525.497	499.164	912.977	500.125	664.567	541.989	692.556	0.33578	-0.353667	0.473946
Q9NZJ5	Eukaryotic translation initiation factor 2-alpha kinase 3 OS=Homo sapiens GN=EIF2AK3 PE=1 SV=3	503.704	625.566	574.229	546.849	689.231	649.033	567.833	628.371	0.335993	-0.146149	0.473669
O43447	Peptidyl-prolyl cis-trans isomerase H OS=Homo sapiens GN=PPIH PE=1 SV=1	647.133	587.324	751.491	653.714	373.862	617.284	661.983	548.287	0.336212	0.271863	0.473387
Q9Y388	RNA-binding motif protein, X-linked 2 OS=Homo sapiens GN=RBMX2 PE=1 SV=2	441.9	648.334	588.374	591.487	622.157	702.498	559.536	638.714	0.336552	-0.190939	0.472947
A0A0C4DH83	EH domain-containing protein 3 OS=Homo sapiens GN=EHD3 PE=1 SV=1	549.143	629.349	528.407	569.008	716.211	602.053	568.966	629.09	0.336554	-0.144924	0.472945
I3L1Q2	B-cell CLL/lymphoma 7 protein family member C (Fragment) OS=Homo sapiens GN=BCL7C PE=1 SV=1	543.279	612.012	501.321	519.505	768.366	642.438	552.204	643.436	0.336586	-0.220597	0.472904
Q12981	Vesicle transport protein SEC20 OS=Homo sapiens GN=BNIP1 PE=1 SV=3	714.492	552.104	649.622	637.881	575.798	499.61	638.739	571.096	0.337107	0.161492	0.472232
C9K0J5	Ras association (RalGDS/AF-6) and pleckstrin homology domains 1, isoform CRA_b OS=Homo sapiens GN=RAPH1 PE=1 SV=1	606.374	619.487	518.97	682.608	610.51	589.944	581.61	627.687	0.337448	-0.109994	0.471793
E7EMK3	Flotillin-2 OS=Homo sapiens GN=FLOT2 PE=1 SV=1	644.301	562.672	542.505	658.007	649.49	575.406	583.16	627.634	0.337529	-0.106034	0.471689
Q8TDN6	Ribosome biogenesis protein BRX1 homolog OS=Homo sapiens GN=BRIX1 PE=1 SV=2	564.313	577.134	622.192	659.316	622.259	578.45	587.879	620.008	0.33779	-0.0767667	0.471353
P29401	Transketolase OS=Homo sapiens GN=TKT PE=1 SV=3	696.07	573.9	623.272	602.727	508.809	620.041	631.081	577.192	0.337792	0.128772	0.471351
Q15555	Microtubule-associated protein RP/EB family member 2 OS=Homo sapiens GN=MAPRE2 PE=1 SV=1	898.116	559.637	589.332	689.76	456.579	461.305	682.362	535.881	0.338013	0.348624	0.471066
Q2M1P5	Kinesin-like protein KIF7 OS=Homo sapiens GN=KIF7 PE=1 SV=2	598.723	606.435	509.463	639.989	711.138	549.923	571.54	633.684	0.338302	-0.148907	0.470695
P78539	Sushi repeat-containing protein SRPX OS=Homo sapiens GN=SRPX PE=1 SV=1	422.509	582.684	637.712	519.024	686.984	738.37	547.635	648.126	0.338359	-0.24306	0.470622
P29372	DNA-3-methyladenine glycosylase OS=Homo sapiens GN=MPG PE=1 SV=3	525.635	592.269	574.454	527.436	712.589	658.959	564.119	632.995	0.338361	-0.166193	0.47062
Q53GT1	Kelch-like protein 22 OS=Homo sapiens GN=KLHL22 PE=1 SV=2	832.909	518.903	836.892	584.932	124.331	752.002	729.568	487.088	0.338421	0.582859	0.470543
E9PGC8	Microtubule-associated protein 1A OS=Homo sapiens GN=MAP1A PE=1 SV=1	558.334	650.646	647.195	519.791	607.865	595.245	618.725	574.301	0.338474	0.107492	0.470474
Q9H792	Pseudopodium-enriched atypical kinase 1 OS=Homo sapiens GN=PEAK1 PE=1 SV=4	574.917	593.288	487.329	650.082	794.765	515.085	551.845	653.311	0.338583	-0.243507	0.470334
C9J7E5	Transportin-3 OS=Homo sapiens GN=TNPO3 PE=1 SV=1	489.647	727.951	713.157	565.686	491.586	584.148	643.585	547.14	0.338855	0.234222	0.469986
Q53LP3	Ankyrin repeat domain-containing protein SOWAHC OS=Homo sapiens GN=SOWAHC PE=1 SV=1	723.264	597.347	604.568	673.509	517.59	517.558	641.726	569.552	0.339371	0.17213	0.469325
Q13084	39S ribosomal protein L28, mitochondrial OS=Homo sapiens GN=MRPL28 PE=1 SV=4	599.253	590.336	461.017	636.055	804.565	524.032	550.202	654.884	0.339662	-0.251277	0.468953
P20338	Ras-related protein Rab-4A OS=Homo sapiens GN=RAB4A PE=1 SV=3	574.588	587.605	580.716	641.433	556.754	685.371	580.97	627.853	0.339848	-0.111963	0.468716
Q9BVS5	tRNA (adenine(58)-N(1))-methyltransferase, mitochondrial OS=Homo sapiens GN=TRMT61B PE=1 SV=2	554.334	598.689	585.506	564.2	676.768	619.654	579.51	620.207	0.339895	-0.0979172	0.468655
O94855	Protein transport protein Sec24D OS=Homo sapiens GN=SEC24D PE=1 SV=2	529.166	638.218	736.076	530.576	536.738	611.289	634.487	559.534	0.340725	0.181364	0.467596
Q96E29	Transcription termination factor 3, mitochondrial OS=Homo sapiens GN=MTERF3 PE=1 SV=2	658.27	591.375	706.303	636.327	406.471	629.06	651.983	557.286	0.340812	0.226416	0.467485
Q13085	Acetyl-CoA carboxylase 1 OS=Homo sapiens GN=ACACA PE=1 SV=2	600.199	585.958	579.182	647.639	568.544	646.119	588.446	620.768	0.340954	-0.0771426	0.467304
Q8TEM1	Nuclear pore membrane glycoprotein 210 OS=Homo sapiens GN=NUP210 PE=1 SV=3	689.502	494.198	528.047	741.421	587.481	630.402	570.583	653.101	0.341108	-0.194871	0.467108
Q6ZRS2	Helicase SRCAP OS=Homo sapiens GN=SRCAP PE=1 SV=3	531.43	603.288	564.363	551.11	728.824	613.795	566.36	631.243	0.341413	-0.156476	0.46672
Q8NHY2	E3 ubiquitin-protein ligase RFWD2 OS=Homo sapiens GN=RFWD2 PE=1 SV=1	471.647	604.413	541.015	539.916	839.425	586.186	539.025	655.176	0.341688	-0.28153	0.46637
Q6P2C8	Mediator of RNA polymerase II transcription subunit 27 OS=Homo sapiens GN=MED27 PE=1 SV=1	605.7	567.643	829.744	604.942	366.566	645.334	667.696	538.947	0.341714	0.309046	0.466337
Q13952	Nuclear transcription factor Y subunit gamma OS=Homo sapiens GN=NFYC PE=1 SV=3	564.775	650.979	513.261	665.001	639.232	581.391	576.338	628.541	0.342014	-0.125092	0.465957
P62241	40S ribosomal protein S8 OS=Homo sapiens GN=RPS8 PE=1 SV=2	583.907	606.41	542.01	617.756	695.986	563.776	577.442	625.839	0.342257	-0.116116	0.465648
P62750	60S ribosomal protein L23a OS=Homo sapiens GN=RPL23A PE=1 SV=1	671.583	623.988	571.704	623.165	580.544	543.895	622.425	582.535	0.3426	0.0955557	0.465213
P55081	Microfibrillar-associated protein 1 OS=Homo sapiens GN=MFAP1 PE=1 SV=2	669.398	657.207	642.314	674.966	390.66	591.498	656.306	552.375	0.34299	0.248723	0.464718
Q9H147	Deoxynucleotidyltransferase terminal-interacting protein 1 OS=Homo sapiens GN=DNTTIP1 PE=1 SV=2	594.513	656.789	598.188	518.676	613.384	599.943	616.496	577.334	0.343073	0.0946852	0.464614
P34896	Serine hydroxymethyltransferase, cytosolic OS=Homo sapiens GN=SHMT1 PE=1 SV=1	643.856	544.422	751.17	598.333	459.454	626.535	646.483	561.441	0.343109	0.203478	0.464567
Q02127	Dihydroorotate dehydrogenase (quinone), mitochondrial OS=Homo sapiens GN=DHODH PE=1 SV=3	442.558	658.054	338.834	558.691	1073.98	498.52	479.815	710.398	0.343576	-0.566148	0.463977
O95391	Pre-mRNA-splicing factor SLU7 OS=Homo sapiens GN=SLU7 PE=1 SV=2	616.429	549.931	393.324	714.026	918.722	443.745	519.895	692.164	0.344245	-0.412895	0.463132
Q99614	Tetratricopeptide repeat protein 1 OS=Homo sapiens GN=TTC1 PE=1 SV=1	623.304	551.479	722.555	560.884	542.743	609.479	632.446	571.035	0.344295	0.147363	0.46307
Q9H082	Ras-related protein Rab-33B OS=Homo sapiens GN=RAB33B PE=1 SV=1	508.81	657.585	554.577	627.86	614.532	640.447	573.657	627.613	0.344393	-0.129687	0.462946
Q96AD5	Patatin-like phospholipase domain-containing protein 2 OS=Homo sapiens GN=PNPLA2 PE=1 SV=1	549.414	700.255	680.403	448.671	703.052	461.874	643.358	537.866	0.344729	0.258375	0.462523
P61964	WD repeat-containing protein 5 OS=Homo sapiens GN=WDR5 PE=1 SV=1	579.428	577.163	607.517	674.159	608.102	582.614	588.036	621.625	0.344857	-0.0801402	0.462361
Q9NVH1	DnaJ homolog subfamily C member 11 OS=Homo sapiens GN=DNAJC11 PE=1 SV=2	630.329	519.877	602.303	663.367	575.41	653.053	584.17	630.61	0.344989	-0.110361	0.462195
P20749	B-cell lymphoma 3 protein OS=Homo sapiens GN=BCL3 PE=1 SV=2	525.342	629.609	547.683	563.518	720.568	604.079	567.545	629.388	0.344993	-0.149216	0.46219
Q9UNM6	26S proteasome non-ATPase regulatory subunit 13 OS=Homo sapiens GN=PSMD13 PE=1 SV=2	559.012	616.459	693.257	570.07	586.79	569.019	622.909	575.293	0.345052	0.114725	0.462116
O94819	Kelch repeat and BTB domain-containing protein 11 OS=Homo sapiens GN=KBTBD11 PE=1 SV=1	417.098	546.567	656.589	552.505	821.597	595.565	540.084	656.555	0.345096	-0.281732	0.46206
P50613	Cyclin-dependent kinase 7 OS=Homo sapiens GN=CDK7 PE=1 SV=1	674.603	609.631	701.714	625.411	359.149	655.292	661.983	546.617	0.345199	0.276263	0.461931
F8VVA7	Coatomer subunit zeta-1 OS=Homo sapiens GN=COPZ1 PE=1 SV=1	1007.32	554.776	529.214	471.211	620.296	425.681	697.102	505.729	0.345219	0.463005	0.461906
Q5T3I0	G patch domain-containing protein 4 OS=Homo sapiens GN=GPATCH4 PE=1 SV=2	947.124	663.921	558.7	775.105	191.822	533.554	723.249	500.16	0.345267	0.532102	0.461845
J3QLS3	28S ribosomal protein S7, mitochondrial OS=Homo sapiens GN=MRPS7 PE=1 SV=1	568.082	603.696	500.535	551.988	772.994	597.81	557.438	640.931	0.346261	-0.201357	0.460597
Q15031	Probable leucine--tRNA ligase, mitochondrial OS=Homo sapiens GN=LARS2 PE=1 SV=2	640.423	623.105	652.744	600.754	449.73	647.432	638.757	565.972	0.346463	0.174537	0.460343
P27348	14-3-3 protein theta OS=Homo sapiens GN=YWHAQ PE=1 SV=1	610.938	605.349	670.223	591.498	493.096	640.242	628.837	574.945	0.34648	0.129261	0.460322
P62942	Peptidyl-prolyl cis-trans isomerase FKBP1A OS=Homo sapiens GN=FKBP1A PE=1 SV=2	554.293	638.949	726.87	397.435	614.483	619.851	640.037	543.923	0.346563	0.234754	0.460218
Q9BTX1	Nucleoporin NDC1 OS=Homo sapiens GN=NDC1 PE=1 SV=2	559.396	605.384	598.261	579.515	614.657	647.191	587.68	613.788	0.346686	-0.0627075	0.460063
P00403	Cytochrome c oxidase subunit 2 OS=Homo sapiens GN=MT-CO2 PE=1 SV=1	546.725	619.084	508.255	550.486	765.062	601.225	558.021	638.924	0.346781	-0.195324	0.459945
A0A0A0MST0	Myeloid differentiation primary response protein MyD88 OS=Homo sapiens GN=MYD88 PE=1 SV=1	432.436	620.153	593.189	510.847	728.11	692.63	548.592	643.862	0.346864	-0.231017	0.459841
P50749	Ras association domain-containing protein 2 OS=Homo sapiens GN=RASSF2 PE=1 SV=1	474.107	652.159	549.704	555.597	618.943	740.462	558.657	638.334	0.347288	-0.192349	0.45931
Q17RN3	Protein FAM98C OS=Homo sapiens GN=FAM98C PE=2 SV=1	579.493	637.623	692.674	546.183	467.477	671.446	636.597	561.702	0.347304	0.180575	0.45929
O75554	WW domain-binding protein 4 OS=Homo sapiens GN=WBP4 PE=1 SV=1	628.301	534.232	492.876	618.592	815.339	532.992	551.803	655.641	0.347443	-0.248752	0.459116
G5EA09	Syndecan binding protein (Syntenin), isoform CRA_a OS=Homo sapiens GN=SDCBP PE=1 SV=1	555.866	732.858	615.981	422.063	646.031	567.901	634.902	545.332	0.347822	0.2194	0.458643
P48681	Nestin OS=Homo sapiens GN=NES PE=1 SV=2	623.065	619.808	607.546	567.066	637.304	542.391	616.806	582.254	0.347868	0.0831697	0.458585
Q8IZD4	mRNA-decapping enzyme 1B OS=Homo sapiens GN=DCP1B PE=1 SV=2	529.522	605.435	582.893	573.833	711.023	593.76	572.617	626.205	0.347958	-0.129065	0.458474
Q9NP77	RNA polymerase II subunit A C-terminal domain phosphatase SSU72 OS=Homo sapiens GN=SSU72 PE=1 SV=1	777.909	549.875	621.219	633.644	490.187	566.467	649.668	563.432	0.348134	0.205459	0.458254
Q9P2G1	Ankyrin repeat and IBR domain-containing protein 1 OS=Homo sapiens GN=ANKIB1 PE=1 SV=3	718.5	605.84	631.097	639.588	408.285	628.55	651.812	558.808	0.348185	0.222105	0.45819
Q15528	Mediator of RNA polymerase II transcription subunit 22 OS=Homo sapiens GN=MED22 PE=1 SV=2	543.105	735.497	607.757	536.435	586.949	556.941	628.786	560.108	0.348217	0.166864	0.458151
Q9NYL9	Tropomodulin-3 OS=Homo sapiens GN=TMOD3 PE=1 SV=1	661.531	509.159	557.204	740.105	590.909	605.294	575.965	645.436	0.348335	-0.164294	0.458002
Q96EI5	Transcription elongation factor A protein-like 4 OS=Homo sapiens GN=TCEAL4 PE=1 SV=2	849.538	465.575	868.551	737.687	176.99	586.561	727.888	500.413	0.348491	0.540598	0.457808
Q16795	NADH dehydrogenase [ubiquinone] 1 alpha subcomplex subunit 9, mitochondrial OS=Homo sapiens GN=NDUFA9 PE=1 SV=2	615.343	664.632	569.478	586.714	604.941	554.627	616.484	582.094	0.34895	0.0828118	0.457237
Q8NI60	Atypical kinase ADCK3, mitochondrial OS=Homo sapiens GN=ADCK3 PE=1 SV=1	595.326	528.763	586.553	615.706	739.939	554.704	570.214	636.783	0.348962	-0.159298	0.457222
O95433	Activator of 90 kDa heat shock protein ATPase homolog 1 OS=Homo sapiens GN=AHSA1 PE=1 SV=1	626.157	591.67	662.378	626.534	507.1	607.107	626.735	580.247	0.348984	0.111188	0.457194
Q13620	Cullin-4B OS=Homo sapiens GN=CUL4B PE=1 SV=4	724.752	552.5	727.205	635.885	352.421	647.844	668.152	545.383	0.349069	0.292906	0.457089
P48059	LIM and senescent cell antigen-like-containing domain protein 1 OS=Homo sapiens GN=LIMS1 PE=1 SV=4	734.632	588.491	631.611	548.361	691.774	401.835	651.578	547.323	0.349416	0.251545	0.456657
A0A0G2JJX2	E3 ubiquitin-protein ligase TRIM31 OS=Homo sapiens GN=TRIM31 PE=1 SV=1	541.99	397.192	684.993	794.822	465.871	813.769	541.391	691.487	0.349606	-0.353031	0.456422
Q8IWV8	E3 ubiquitin-protein ligase UBR2 OS=Homo sapiens GN=UBR2 PE=1 SV=1	605.101	645.139	591.082	565.382	629.123	556.707	613.774	583.737	0.349747	0.0723878	0.456246
O94804	Serine/threonine-protein kinase 10 OS=Homo sapiens GN=STK10 PE=1 SV=1	725.722	568.435	653.685	645.774	433.632	610.941	649.281	563.449	0.349984	0.204558	0.455952
Q13748	Tubulin alpha-3C/D chain OS=Homo sapiens GN=TUBA3C PE=1 SV=3	555.937	589.01	551.788	568.588	747.454	586.638	565.579	634.227	0.35033	-0.165271	0.455523
G0XQ39	STIM1L OS=Homo sapiens GN=STIM1 PE=1 SV=1	1140.86	529.969	529.387	620.378	428.32	410.818	733.406	486.505	0.350351	0.592156	0.455497
O95365	Zinc finger and BTB domain-containing protein 7A OS=Homo sapiens GN=ZBTB7A PE=1 SV=1	473.526	718.421	746.735	413.871	635.296	543.762	646.227	530.976	0.35049	0.283395	0.455324
Q9UKD2	mRNA turnover protein 4 homolog OS=Homo sapiens GN=MRTO4 PE=1 SV=2	548.291	595.67	558.604	532.627	709.9	648.275	567.521	630.267	0.350785	-0.151289	0.454959
Q6J4K2	Sodium/potassium/calcium exchanger 6, mitochondrial OS=Homo sapiens GN=SLC8B1 PE=1 SV=2	578.315	589.014	533.62	529.106	710.23	656.461	566.983	631.932	0.350865	-0.156465	0.45486
Q96I24	Far upstream element-binding protein 3 OS=Homo sapiens GN=FUBP3 PE=1 SV=2	682.709	637.122	568.87	554.934	655.085	494.761	629.567	568.26	0.35089	0.147809	0.45483
Q96L50	Leucine-rich repeat protein 1 OS=Homo sapiens GN=LRR1 PE=1 SV=2	638.557	595.845	442.255	589.942	755.928	588.739	558.886	644.87	0.351009	-0.206455	0.454682
Q96RR1	Twinkle protein, mitochondrial OS=Homo sapiens GN=PEO1 PE=1 SV=1	521.235	618.331	539.646	531.765	744.944	630.229	559.737	635.646	0.351025	-0.183473	0.454662
H0Y4R1	Inosine-5'-monophosphate dehydrogenase 2 (Fragment) OS=Homo sapiens GN=IMPDH2 PE=1 SV=1	638.992	578.44	621.137	581.586	595.941	596.034	612.856	591.187	0.351083	0.051934	0.45459
Q9NX00	Transmembrane protein 160 OS=Homo sapiens GN=TMEM160 PE=1 SV=1	690.291	500.769	458.23	592.09	812.458	575.446	549.763	659.998	0.351272	-0.263651	0.454356
Q9UL54	Serine/threonine-protein kinase TAO2 OS=Homo sapiens GN=TAOK2 PE=1 SV=2	767.289	550.816	632.515	627.838	457.68	603.331	650.207	562.95	0.35139	0.207893	0.454211
Q5JPI3	Uncharacterized protein C3orf38 OS=Homo sapiens GN=C3orf38 PE=1 SV=1	683.987	649.252	601.254	693.301	472.535	528.115	644.831	564.65	0.352102	0.191564	0.453331
Q9Y3E0	Vesicle transport protein GOT1B OS=Homo sapiens GN=GOLT1B PE=1 SV=1	744.04	378.062	424.9	738.008	944.952	448.898	515.668	710.619	0.352151	-0.462636	0.45327
A0A096LNH6	Dedicator of cytokinesis protein 1 OS=Homo sapiens GN=DOCK1 PE=1 SV=1	587.176	564.154	607.33	662.082	561.301	651.577	586.22	624.987	0.352343	-0.0923834	0.453034
Q70IA6	MOB kinase activator 2 OS=Homo sapiens GN=MOB2 PE=1 SV=1	547.046	738.083	616.365	512.629	500.077	653.616	633.831	555.441	0.352543	0.190465	0.452788
Q8IZ83	Aldehyde dehydrogenase family 16 member A1 OS=Homo sapiens GN=ALDH16A1 PE=1 SV=2	666.835	559.248	753.87	618.574	380.2	651.75	659.984	550.175	0.352551	0.262541	0.452778
J3KNQ4	Alpha-parvin OS=Homo sapiens GN=PARVA PE=1 SV=1	405.386	806.685	813.132	380.658	414.057	695.569	675.067	496.761	0.352571	0.44248	0.452753
Q8N4Q1	Mitochondrial intermembrane space import and assembly protein 40 OS=Homo sapiens GN=CHCHD4 PE=1 SV=1	285.505	801.247	1204.05	243.419	108.954	838.604	763.602	396.992	0.352807	0.94371	0.452463
O00178	GTP-binding protein 1 OS=Homo sapiens GN=GTPBP1 PE=1 SV=3	635.501	555.495	561.007	685.373	563.836	643.138	584.001	630.782	0.352844	-0.111171	0.452417
Q6P158	Putative ATP-dependent RNA helicase DHX57 OS=Homo sapiens GN=DHX57 PE=1 SV=2	508.003	599.916	614.619	589.829	588.543	706.627	574.179	628.333	0.35318	-0.130028	0.452003
Q8NFW8	N-acylneuraminate cytidylyltransferase OS=Homo sapiens GN=CMAS PE=1 SV=2	581.622	617.34	672.746	638.938	531.473	571.601	623.903	580.671	0.353275	0.103601	0.451888
Q9HAJ7	Histone deacetylase complex subunit SAP30L OS=Homo sapiens GN=SAP30L PE=1 SV=1	636.777	457.395	564.543	827.787	480.032	734.138	552.905	680.652	0.353321	-0.299886	0.45183
Q9H0R6	Glutamyl-tRNA(Gln) amidotransferase subunit A, mitochondrial OS=Homo sapiens GN=QRSL1 PE=1 SV=2	509.512	612.569	604.367	564.433	632.846	673.395	575.483	623.558	0.353892	-0.115751	0.451129
Q8N108	Mesoderm induction early response protein 1 OS=Homo sapiens GN=MIER1 PE=1 SV=2	661.991	478.973	577.138	757.928	602.602	593.555	572.701	651.362	0.354109	-0.185677	0.450863
A0A0A0MTL5	S-phase kinase-associated protein 2 OS=Homo sapiens GN=SKP2 PE=1 SV=1	634.957	540.291	449.652	672.595	846.79	487.853	541.634	669.08	0.354499	-0.304861	0.450385
Q8IWJ2	GRIP and coiled-coil domain-containing protein 2 OS=Homo sapiens GN=GCC2 PE=1 SV=4	562.949	622.861	669.74	527.192	599.653	603.567	618.517	576.804	0.354631	0.100731	0.450223
Q9Y6Q9	Nuclear receptor coactivator 3 OS=Homo sapiens GN=NCOA3 PE=1 SV=1	608.086	564.581	528.378	608.931	751.623	553.587	567.015	638.047	0.354979	-0.170276	0.449797
Q86UW9	Probable E3 ubiquitin-protein ligase DTX2 OS=Homo sapiens GN=DTX2 PE=1 SV=3	598.38	596.321	667.228	607.48	531.331	612.765	620.643	583.859	0.355114	0.0881436	0.449632
P43304	Glycerol-3-phosphate dehydrogenase, mitochondrial OS=Homo sapiens GN=GPD2 PE=1 SV=3	601.488	621.248	516.703	688.274	631.161	568.142	579.813	629.192	0.355256	-0.117914	0.449458
Q8TCD5	5'(3')-deoxyribonucleotidase, cytosolic type OS=Homo sapiens GN=NT5C PE=1 SV=2	591.475	615.161	642.537	617.105	602.54	538.29	616.391	585.979	0.355431	0.0729978	0.449244
Q9H0J4	Glutamine-rich protein 2 OS=Homo sapiens GN=QRICH2 PE=1 SV=1	170.382	953.23	1100.8	198.989	515.691	472.697	741.469	395.792	0.355509	0.905643	0.449149
Q96PZ2	Protein FAM111A OS=Homo sapiens GN=FAM111A PE=1 SV=2	543.675	642.901	720.539	471.974	527.054	666.038	635.705	555.022	0.355529	0.195813	0.449125
P62280	40S ribosomal protein S11 OS=Homo sapiens GN=RPS11 PE=1 SV=3	703.34	582.592	657.224	656.477	431.774	604.939	647.719	564.397	0.355883	0.198657	0.448692
Q9BT25	HAUS augmin-like complex subunit 8 OS=Homo sapiens GN=HAUS8 PE=1 SV=3	650.725	560.199	473.444	749.198	705.555	512.199	561.456	655.651	0.355916	-0.223755	0.448653
O95487	Protein transport protein Sec24B OS=Homo sapiens GN=SEC24B PE=1 SV=2	505.223	637.39	842.561	468.475	427.747	688.868	661.725	528.363	0.355943	0.324701	0.448619
Q9NSK7	Protein C19orf12 OS=Homo sapiens GN=C19orf12 PE=1 SV=3	432.075	682.897	889.603	380.129	575.369	566.215	668.192	507.238	0.356019	0.397599	0.448527
Q12772	Sterol regulatory element-binding protein 2 OS=Homo sapiens GN=SREBF2 PE=1 SV=2	549.646	609.763	540.185	713.937	697.211	515.877	566.531	642.342	0.356139	-0.181186	0.448381
Q96T76	MMS19 nucleotide excision repair protein homolog OS=Homo sapiens GN=MMS19 PE=1 SV=2	601.952	607.039	671.369	591.237	499.941	638.581	626.786	576.586	0.356215	0.120438	0.448288
P80297	Metallothionein-1X OS=Homo sapiens GN=MT1X PE=1 SV=1	1184.62	185.536	1130.72	793.574	37.9907	424.756	833.626	418.774	0.356252	0.99323	0.448243
Q96G23	Ceramide synthase 2 OS=Homo sapiens GN=CERS2 PE=1 SV=1	737.395	576.618	771.078	717.206	245.538	607.483	695.03	523.409	0.356358	0.409138	0.448113
Q4VXU2	Polyadenylate-binding protein 1-like OS=Homo sapiens GN=PABPC1L PE=2 SV=1	593.074	560.253	610.36	578.346	654.214	615.086	587.896	615.882	0.356398	-0.0670938	0.448064
P61088	Ubiquitin-conjugating enzyme E2 N OS=Homo sapiens GN=UBE2N PE=1 SV=1	609.916	608.681	560.002	626.524	596.618	616.037	592.866	613.06	0.356416	-0.0483206	0.448043
Q13625	Apoptosis-stimulating of p53 protein 2 OS=Homo sapiens GN=TP53BP2 PE=1 SV=2	599.354	591.072	538.622	629.529	703.848	553.167	576.35	628.848	0.356417	-0.125767	0.448041
Q7Z7F7	39S ribosomal protein L55, mitochondrial OS=Homo sapiens GN=MRPL55 PE=1 SV=1	617.219	540.308	453.831	601.274	880.363	522.456	537.119	668.031	0.356668	-0.314672	0.447736
P49759	Dual specificity protein kinase CLK1 OS=Homo sapiens GN=CLK1 PE=1 SV=2	516.381	636.329	779.223	521.413	491.222	636.145	643.978	549.593	0.356724	0.228647	0.447668
A0A087WWF6	DNA polymerase delta subunit 2 OS=Homo sapiens GN=POLD2 PE=1 SV=1	613.179	571.137	702.052	539.317	530.477	648.012	628.79	572.602	0.356983	0.135044	0.447352
Q6ZNB6	NF-X1-type zinc finger protein NFXL1 OS=Homo sapiens GN=NFXL1 PE=1 SV=2	523.47	608.851	816.61	488.574	503.773	635.903	649.644	542.75	0.35703	0.259362	0.447295
Q8IWT6	Volume-regulated anion channel subunit LRRC8A OS=Homo sapiens GN=LRRC8A PE=1 SV=1	456.821	637.604	548.312	535.533	790.284	608.415	547.579	644.744	0.357364	-0.235659	0.446889
Q5JTH9	RRP12-like protein OS=Homo sapiens GN=RRP12 PE=1 SV=2	798.652	540.872	702.717	719.005	340.807	561.028	680.747	540.28	0.357526	0.333411	0.446692
O95644	Nuclear factor of activated T-cells, cytoplasmic 1 OS=Homo sapiens GN=NFATC1 PE=1 SV=3	510.96	655.757	761.05	433.82	545.397	649.757	642.589	542.991	0.357618	0.242968	0.446581
O00311	Cell division cycle 7-related protein kinase OS=Homo sapiens GN=CDC7 PE=1 SV=1	541.574	588.243	484.676	599.34	866.312	520.996	538.164	662.216	0.35769	-0.299255	0.446494
Q9BZF3	Oxysterol-binding protein-related protein 6 OS=Homo sapiens GN=OSBPL6 PE=1 SV=1	489.536	602.31	569.074	515.138	764.123	642.245	553.64	640.502	0.357719	-0.210254	0.446458
Q13405	39S ribosomal protein L49, mitochondrial OS=Homo sapiens GN=MRPL49 PE=1 SV=1	732.506	458.518	441.329	807.76	753.41	493.009	544.118	684.726	0.357739	-0.331608	0.446434
Q99615	DnaJ homolog subfamily C member 7 OS=Homo sapiens GN=DNAJC7 PE=1 SV=2	712.326	537.583	673.595	626.708	489.471	596.008	641.168	570.729	0.357777	0.167896	0.446387
Q69YN2	CWF19-like protein 1 OS=Homo sapiens GN=CWF19L1 PE=1 SV=2	521.68	697.639	674.41	485.085	543.784	641.105	631.243	556.658	0.357915	0.181404	0.44622
P14854	Cytochrome c oxidase subunit 6B1 OS=Homo sapiens GN=COX6B1 PE=1 SV=2	573.151	674.144	654.877	439.215	678.971	532.039	634.057	550.075	0.358027	0.204985	0.446084
P27986	Phosphatidylinositol 3-kinase regulatory subunit alpha OS=Homo sapiens GN=PIK3R1 PE=1 SV=2	549.326	491.005	666.877	638.678	558.887	736.554	569.069	644.706	0.358093	-0.180038	0.446004
M0R2B7	DNA polymerase OS=Homo sapiens GN=POLD1 PE=1 SV=1	541.062	627.211	583.411	581.407	626.682	639.76	583.895	615.95	0.358651	-0.0771042	0.445328
Q06203	Amidophosphoribosyltransferase OS=Homo sapiens GN=PPAT PE=1 SV=1	561.674	588.82	537.521	561.5	761.195	587.57	562.672	636.755	0.358674	-0.178446	0.4453
O60890	Oligophrenin-1 OS=Homo sapiens GN=OPHN1 PE=1 SV=1	834.065	510.466	841.613	775.131	148.771	575.399	728.715	499.767	0.358828	0.544099	0.445114
Q13608	Peroxisome assembly factor 2 OS=Homo sapiens GN=PEX6 PE=1 SV=2	472.794	660.855	560.227	570.811	654.977	668.412	564.625	631.4	0.359172	-0.161261	0.444697
O95292	Vesicle-associated membrane protein-associated protein B/C OS=Homo sapiens GN=VAPB PE=1 SV=3	780.763	522.754	662.241	658.782	491.628	530.93	655.253	560.447	0.359277	0.225474	0.444571
P11234	Ras-related protein Ral-B OS=Homo sapiens GN=RALB PE=1 SV=1	712.163	618.004	561.656	615.193	593.275	514.975	630.608	574.481	0.359347	0.134484	0.444486
Q16401	26S proteasome non-ATPase regulatory subunit 5 OS=Homo sapiens GN=PSMD5 PE=1 SV=3	594.345	670.072	613.981	492.414	665.927	531.27	626.133	563.204	0.359423	0.152811	0.444394
P04732	Metallothionein-1E OS=Homo sapiens GN=MT1E PE=1 SV=1	1088.72	172.897	1238.66	776.215	36.6419	433.695	833.423	415.517	0.360003	1.00414	0.443694
Q6IQ49	Protein SDE2 homolog OS=Homo sapiens GN=SDE2 PE=1 SV=1	838.839	547.747	668.292	732.931	340.178	539.553	684.959	537.554	0.360427	0.349609	0.443183
Q8TE73	Dynein heavy chain 5, axonemal OS=Homo sapiens GN=DNAH5 PE=1 SV=3	306.037	479.154	726.184	731.057	425.683	995.114	503.792	717.285	0.360601	-0.509719	0.442973
Q9BVK6	Transmembrane emp24 domain-containing protein 9 OS=Homo sapiens GN=TMED9 PE=1 SV=2	599.535	581.256	482.314	596.753	802.578	546.039	554.368	648.457	0.360643	-0.226165	0.442922
O76003	Glutaredoxin-3 OS=Homo sapiens GN=GLRX3 PE=1 SV=2	593.174	588.831	547.364	603.938	709.593	567.159	576.456	626.896	0.360726	-0.121016	0.442822
Q8NAT1	Protein O-linked-mannose beta-1,4-N-acetylglucosaminyltransferase 2 OS=Homo sapiens GN=POMGNT2 PE=1 SV=1	545.722	603.172	572.025	575.703	588.952	722.53	573.64	629.062	0.360983	-0.133057	0.442514
O43809	Cleavage and polyadenylation specificity factor subunit 5 OS=Homo sapiens GN=NUDT21 PE=1 SV=1	570.529	609.627	519.198	604.957	745.828	554.213	566.451	634.999	0.361359	-0.164803	0.442061
A0A087WZ30	ATP-dependent DNA helicase Q4 OS=Homo sapiens GN=RECQL4 PE=1 SV=1	636.242	532.741	770.688	557.797	475.921	642.538	646.557	558.752	0.361408	0.210569	0.442002
Q8WUB8	PHD finger protein 10 OS=Homo sapiens GN=PHF10 PE=1 SV=3	582.002	601.47	594.931	633.138	624.122	579.645	592.801	612.302	0.361568	-0.0466956	0.44181
Q7Z3K6	Mesoderm induction early response protein 3 OS=Homo sapiens GN=MIER3 PE=1 SV=2	601.528	639.615	679.514	620.751	434.872	636.151	640.219	563.924	0.361579	0.183064	0.441797
G3V4K3	Spermatogenesis-defective protein 39 homolog OS=Homo sapiens GN=VIPAS39 PE=1 SV=1	545.681	558.061	625.681	564.461	696.903	613.083	576.474	624.815	0.3618	-0.116174	0.441531
Q9NXC5	WD repeat-containing protein mio OS=Homo sapiens GN=MIOS PE=1 SV=2	539.82	499.063	602.212	874.308	469.344	711.045	547.032	684.899	0.36216	-0.324266	0.441099
P22681	E3 ubiquitin-protein ligase CBL OS=Homo sapiens GN=CBL PE=1 SV=2	494.57	674.292	752.382	432.833	622.906	569.503	640.415	541.748	0.362309	0.241386	0.440921
A0A0C4DGV4	Hepatitis B virus x interacting protein OS=Homo sapiens GN=LAMTOR5 PE=1 SV=1	659.522	669.391	632.809	449.441	739.537	403.164	653.908	530.714	0.362314	0.301152	0.440915
Q8TCS8	Polyribonucleotide nucleotidyltransferase 1, mitochondrial OS=Homo sapiens GN=PNPT1 PE=1 SV=2	639.58	543.706	556.356	727.696	567.761	620.126	579.881	638.528	0.362618	-0.138994	0.440551
Q9BUP3	Oxidoreductase HTATIP2 OS=Homo sapiens GN=HTATIP2 PE=1 SV=2	617.636	576.135	668.989	585.102	540.477	625.191	620.92	583.59	0.362702	0.0894519	0.44045
C9JEJ2	Choline-phosphate cytidylyltransferase A OS=Homo sapiens GN=PCYT1A PE=1 SV=1	497.899	604.407	575.236	601.746	771.465	546.532	559.18	639.914	0.363275	-0.194565	0.439765
Q9UBV8	Peflin OS=Homo sapiens GN=PEF1 PE=1 SV=1	603.05	664.264	615.869	550.056	497.195	663.073	627.728	570.108	0.36342	0.138904	0.439591
Q9P2J9	[Pyruvate dehydrogenase [acetyl-transferring]]-phosphatase 2, mitochondrial OS=Homo sapiens GN=PDP2 PE=2 SV=2	651.239	678.934	584.142	656.341	455.189	590.821	638.105	567.45	0.363696	0.1693	0.439262
Q9H410	Kinetochore-associated protein DSN1 homolog OS=Homo sapiens GN=DSN1 PE=1 SV=2	765.344	611.991	650.677	694.156	313.642	611.523	676.004	539.774	0.363812	0.324678	0.439123
P55084	Trifunctional enzyme subunit beta, mitochondrial OS=Homo sapiens GN=HADHB PE=1 SV=3	641.754	594.24	599.142	606.35	580.367	594.228	611.712	593.648	0.363933	0.043244	0.438978
Q96AP0	Adrenocortical dysplasia protein homolog OS=Homo sapiens GN=ACD PE=1 SV=3	583.504	584.404	566.997	603.801	702.546	568.654	578.302	625	0.363953	-0.112034	0.438955
Q01995	Transgelin OS=Homo sapiens GN=TAGLN PE=1 SV=4	639.1	700.031	541.012	605.15	573.763	536.897	626.714	571.937	0.363997	0.131952	0.438902
O95816	BAG family molecular chaperone regulator 2 OS=Homo sapiens GN=BAG2 PE=1 SV=1	611.614	581.985	594.324	619.989	587.807	625.124	595.974	610.973	0.364099	-0.0358595	0.438781
Q96BP2	Coiled-coil-helix-coiled-coil-helix domain-containing protein 1 OS=Homo sapiens GN=CHCHD1 PE=1 SV=1	700.17	357.483	503.408	893.982	858.746	399.062	520.353	717.263	0.36414	-0.463011	0.438731
Q14320	Protein FAM50A OS=Homo sapiens GN=FAM50A PE=1 SV=2	655.081	534.731	566.142	645.545	603.313	633.763	585.318	627.54	0.364346	-0.100488	0.438486
P09497	Clathrin light chain B OS=Homo sapiens GN=CLTB PE=1 SV=1	667.355	627.843	825.599	669.607	159.741	685.35	706.932	504.899	0.364798	0.485577	0.437947
Q92503	SEC14-like protein 1 OS=Homo sapiens GN=SEC14L1 PE=1 SV=2	334.634	706.687	499.43	463.254	823.381	718.928	513.584	668.521	0.36498	-0.380374	0.437731
A0A0A0MRT2	WW domain-containing adapter protein with coiled-coil OS=Homo sapiens GN=WAC PE=1 SV=1	626.392	626.188	591.827	563.954	635.688	552.475	614.802	584.039	0.365262	0.0740582	0.437396
P19532	Transcription factor E3 OS=Homo sapiens GN=TFE3 PE=1 SV=4	718.647	656.071	535.315	540.139	659.503	479.468	636.678	559.703	0.365289	0.185901	0.437363
Q15050	Ribosome biogenesis regulatory protein homolog OS=Homo sapiens GN=RRS1 PE=1 SV=2	728.825	567.995	631.604	646.952	465.801	596.619	642.808	569.791	0.365526	0.173956	0.437082
A0A087WW39	Protein AF-17 OS=Homo sapiens GN=MLLT6 PE=1 SV=1	541.479	621.041	491.465	618.336	805.118	523.793	551.328	649.082	0.365865	-0.23549	0.436679
Q9UL12	Sarcosine dehydrogenase, mitochondrial OS=Homo sapiens GN=SARDH PE=1 SV=1	591.495	587.217	734.066	502.007	500.958	677.023	637.592	559.996	0.366035	0.187219	0.436478
P84095	Rho-related GTP-binding protein RhoG OS=Homo sapiens GN=RHOG PE=1 SV=1	473.366	601.02	1043.19	404.294	294.989	743.839	705.859	481.041	0.366214	0.553222	0.436265
Q9Y2F9	BTB/POZ domain-containing protein 3 OS=Homo sapiens GN=BTBD3 PE=2 SV=1	430.379	584.467	537.954	451.81	906.389	654.038	517.6	670.746	0.366603	-0.373929	0.435804
Q9BRQ8	Apoptosis-inducing factor 2 OS=Homo sapiens GN=AIFM2 PE=1 SV=1	490.308	669.631	523.024	548.124	693.445	657.433	560.988	633.001	0.366668	-0.174238	0.435727
P78357	Contactin-associated protein 1 OS=Homo sapiens GN=CNTNAP1 PE=1 SV=1	468.036	713.385	445.852	566.465	760.678	621.15	542.424	649.431	0.366714	-0.259754	0.435673
Q9Y508	E3 ubiquitin-protein ligase RNF114 OS=Homo sapiens GN=RNF114 PE=1 SV=1	512.328	658.865	730.096	462.112	597.111	599.237	633.763	552.82	0.366846	0.197133	0.435516
O14777	Kinetochore protein NDC80 homolog OS=Homo sapiens GN=NDC80 PE=1 SV=1	653.717	585.17	637.922	644.521	524.399	581.184	625.603	583.368	0.367066	0.100842	0.435256
Q15788	Nuclear receptor coactivator 1 OS=Homo sapiens GN=NCOA1 PE=1 SV=3	653.275	499.26	491.971	822.488	743.674	464.408	548.169	676.857	0.367224	-0.304231	0.435069
Q86XJ5	JRK protein OS=Homo sapiens GN=JRK PE=1 SV=1	493.258	564.323	547.903	525.113	874.56	581.181	535.162	660.285	0.36749	-0.303114	0.434754
Q9H3C7	Gametogenetin-binding protein 2 OS=Homo sapiens GN=GGNBP2 PE=1 SV=1	417.975	651.476	515.014	558.015	882.862	547.298	528.155	662.725	0.3676	-0.327449	0.434624
Q6PHR2	Serine/threonine-protein kinase ULK3 OS=Homo sapiens GN=ULK3 PE=1 SV=2	505.018	623.564	527.026	531.003	788.582	606.878	551.87	642.154	0.367729	-0.218593	0.434472
Q9Y2C4	Nuclease EXOG, mitochondrial OS=Homo sapiens GN=EXOG PE=1 SV=2	920.718	593.858	655.77	778.781	157.044	575.866	723.449	503.897	0.367789	0.521761	0.434402
P02795	Metallothionein-2 OS=Homo sapiens GN=MT2A PE=1 SV=1	1139.32	177.8	1163.45	782.104	37.0312	453.884	826.855	424.34	0.368045	0.962415	0.434099
Q96CN4	EVI5-like protein OS=Homo sapiens GN=EVI5L PE=1 SV=1	612.845	598.569	510.784	632.05	710.06	551.943	574.066	631.351	0.368114	-0.137226	0.434018
Q969T7	7-methylguanosine phosphate-specific 5'-nucleotidase OS=Homo sapiens GN=NT5C3B PE=1 SV=4	560.299	617.559	509.974	568.753	759.133	579.469	562.611	635.785	0.368654	-0.176402	0.433381
H0Y9X1	Translation machinery-associated protein 16 (Fragment) OS=Homo sapiens GN=TMA16 PE=1 SV=1	472.03	706.806	800.215	487.073	402.936	693.07	659.684	527.693	0.368932	0.322074	0.433054
Q9BY43	Charged multivesicular body protein 4a OS=Homo sapiens GN=CHMP4A PE=1 SV=3	891.582	454.018	755.99	605.093	280.98	676.535	700.53	520.869	0.369105	0.427526	0.43285
Q712K3	Ubiquitin-conjugating enzyme E2 R2 OS=Homo sapiens GN=UBE2R2 PE=1 SV=1	499.677	606.756	872.407	400.781	661.025	503.281	659.613	521.696	0.369175	0.338412	0.432767
Q96P48	Arf-GAP with Rho-GAP domain, ANK repeat and PH domain-containing protein 1 OS=Homo sapiens GN=ARAP1 PE=1 SV=3	519.351	598.157	619.558	574.838	614.531	676.445	579.022	621.938	0.369305	-0.103153	0.432615
Q5JWF2	Guanine nucleotide-binding protein G(s) subunit alpha isoforms XLas OS=Homo sapiens GN=GNAS PE=1 SV=2	501.453	638.933	568.853	552.351	685.311	640.284	569.746	625.982	0.369608	-0.135801	0.432259
Q96QD9	UAP56-interacting factor OS=Homo sapiens GN=FYTTD1 PE=1 SV=3	600.856	580.148	208.739	689.674	1173.71	365.727	463.248	743.037	0.369931	-0.68165	0.431879
P49454	Centromere protein F OS=Homo sapiens GN=CENPF PE=1 SV=2	497.794	667.652	531.484	586.508	596.692	716.591	565.643	633.264	0.370055	-0.162914	0.431734
H3BR70	Pyruvate kinase OS=Homo sapiens GN=PKM PE=1 SV=1	574.883	556.839	600.773	544.877	677.574	649.526	577.498	623.992	0.370211	-0.111712	0.431551
Q16667	Cyclin-dependent kinase inhibitor 3 OS=Homo sapiens GN=CDKN3 PE=1 SV=1	747.987	537.508	702.188	721.469	455.789	489.545	662.561	555.601	0.37022	0.254004	0.43154
Q16822	Phosphoenolpyruvate carboxykinase [GTP], mitochondrial OS=Homo sapiens GN=PCK2 PE=1 SV=3	500.008	607.965	561.935	544.816	776.65	595.052	556.636	638.839	0.370348	-0.198718	0.43139
Q5QPA5	28S ribosomal protein S18a, mitochondrial (Fragment) OS=Homo sapiens GN=MRPS18A PE=1 SV=7	850.298	548.361	766.67	819.225	188.794	514.528	721.776	507.516	0.37066	0.508098	0.431024
Q96Q42	Alsin OS=Homo sapiens GN=ALS2 PE=1 SV=2	595.315	948.019	471.019	560.066	538.255	423.811	671.451	507.377	0.370778	0.404223	0.430886
Q9NW68	BSD domain-containing protein 1 OS=Homo sapiens GN=BSDC1 PE=1 SV=1	736.353	535.589	646.114	618.947	535.954	560.677	639.352	571.859	0.370783	0.160951	0.430881
P54687	Branched-chain-amino-acid aminotransferase, cytosolic OS=Homo sapiens GN=BCAT1 PE=1 SV=3	657.746	622.442	618.542	431.397	657.825	581.172	632.91	556.798	0.370833	0.184846	0.430822
Q86VU5	Catechol O-methyltransferase domain-containing protein 1 OS=Homo sapiens GN=COMTD1 PE=1 SV=1	512.732	547.272	611.365	498.661	688.185	737.118	557.123	641.321	0.371001	-0.203051	0.430625
P09622	Dihydrolipoyl dehydrogenase, mitochondrial OS=Homo sapiens GN=DLD PE=1 SV=2	747.059	551.781	612.77	595.902	579.44	537.933	637.203	571.092	0.371637	0.158032	0.429881
Q8NFZ8	Cell adhesion molecule 4 OS=Homo sapiens GN=CADM4 PE=1 SV=1	621.03	620.582	636.344	462.603	637.123	597.351	625.985	565.692	0.371756	0.146111	0.429742
Q8WVQ1	Soluble calcium-activated nucleotidase 1 OS=Homo sapiens GN=CANT1 PE=1 SV=1	467.165	619.84	610.68	557.607	631.83	705.872	565.895	631.77	0.371809	-0.158865	0.42968
Q8TAK5	GA-binding protein subunit beta-2 OS=Homo sapiens GN=GABPB2 PE=1 SV=1	465.936	808.002	713.785	288.131	726.306	479.955	662.574	498.131	0.371897	0.411558	0.429578
H0YE88	Transcriptional enhancer factor TEF-1 OS=Homo sapiens GN=TEAD1 PE=1 SV=1	927.151	614.505	541.357	747.136	349.534	485.603	694.338	527.424	0.371957	0.396673	0.429508
Q7Z3T8	Zinc finger FYVE domain-containing protein 16 OS=Homo sapiens GN=ZFYVE16 PE=1 SV=3	548.37	695.507	624.477	547.817	632.887	524.354	622.785	568.353	0.37196	0.131947	0.429504
Q8IYD1	Eukaryotic peptide chain release factor GTP-binding subunit ERF3B OS=Homo sapiens GN=GSPT2 PE=1 SV=2	518.114	678.777	726.764	512.547	462.816	676.446	641.218	550.603	0.372211	0.219804	0.429211
O43852	Calumenin OS=Homo sapiens GN=CALU PE=1 SV=2	561.363	619.153	715.593	544.549	496.357	657.535	632.036	566.147	0.372294	0.158831	0.429114
H7BYY1	Tropomyosin 1 (Alpha), isoform CRA_m OS=Homo sapiens GN=TPM1 PE=1 SV=1	584.824	562.156	602.686	570.327	678.117	609.858	583.222	619.434	0.372547	-0.0869056	0.428819
Q9Y657	Spindlin-1 OS=Homo sapiens GN=SPIN1 PE=1 SV=3	475.747	567.676	585.658	490.678	814.512	646.224	543.027	650.471	0.372614	-0.260462	0.428741
Q5VW38	Protein GPR107 OS=Homo sapiens GN=GPR107 PE=1 SV=1	549.438	596.977	860.145	444.155	390.317	736.492	668.854	523.655	0.372663	0.353074	0.428684
Q6PJW8	Consortin OS=Homo sapiens GN=CNST PE=1 SV=3	316.44	757.669	1027.59	241.701	640.838	480.242	700.566	454.26	0.372858	0.625	0.428457
Q9BUE6	Iron-sulfur cluster assembly 1 homolog, mitochondrial OS=Homo sapiens GN=ISCA1 PE=2 SV=1	577.483	634.774	638.077	546.793	556.845	639.001	616.778	580.88	0.373098	0.086512	0.428177
Q9H0N0	Ras-related protein Rab-6C OS=Homo sapiens GN=RAB6C PE=1 SV=2	740.412	664.249	514.848	559.378	635.229	480.618	639.836	558.408	0.373147	0.196383	0.42812
Q86TX2	Acyl-coenzyme A thioesterase 1 OS=Homo sapiens GN=ACOT1 PE=1 SV=1	655.227	574.196	480.756	760.334	628.345	556.82	570.059	648.5	0.373292	-0.185994	0.427952
Q8NEY1	Neuron navigator 1 OS=Homo sapiens GN=NAV1 PE=1 SV=2	704.99	608.295	579.533	636.954	589.507	501.125	630.94	575.862	0.37333	0.131779	0.427907
P30039	Phenazine biosynthesis-like domain-containing protein OS=Homo sapiens GN=PBLD PE=1 SV=2	464.099	597.641	631.493	545.609	689.991	660.858	564.411	632.153	0.373406	-0.163528	0.427818
Q9Y5Q9	General transcription factor 3C polypeptide 3 OS=Homo sapiens GN=GTF3C3 PE=1 SV=1	494.896	627.141	572.826	541.764	720.435	627.729	564.954	629.976	0.373472	-0.157163	0.427742
P49321	Nuclear autoantigenic sperm protein OS=Homo sapiens GN=NASP PE=1 SV=2	820.15	530.952	639.58	680.128	448.064	536.194	663.561	554.795	0.373792	0.258274	0.42737
Q5T2W1	Na(+)/H(+) exchange regulatory cofactor NHE-RF3 OS=Homo sapiens GN=PDZK1 PE=1 SV=2	648.795	646.394	597.56	432.264	644.32	596.882	630.916	557.822	0.373889	0.177644	0.427258
A8MT02	Small nuclear ribonucleoprotein-associated proteins B and B' OS=Homo sapiens GN=SNRPB PE=1 SV=3	425.83	654.932	563.728	533.334	765.373	629.479	548.163	642.729	0.37445	-0.229604	0.426606
Q13523	Serine/threonine-protein kinase PRP4 homolog OS=Homo sapiens GN=PRPF4B PE=1 SV=3	671.043	581.337	642.597	639.555	490.873	604.034	631.659	578.154	0.374512	0.127692	0.426535
P12956	X-ray repair cross-complementing protein 6 OS=Homo sapiens GN=XRCC6 PE=1 SV=2	686.674	589.271	600.26	632.007	533.061	585.187	625.402	583.418	0.374518	0.100253	0.426527
Q9ULD9	Zinc finger protein 608 OS=Homo sapiens GN=ZNF608 PE=1 SV=4	637.966	538.564	1042.33	691.89	58.6361	681.582	739.619	477.369	0.374789	0.631677	0.426213
Q9UGP5	DNA polymerase lambda OS=Homo sapiens GN=POLL PE=1 SV=1	357.354	504.514	664.375	433.282	927.329	680.652	508.748	680.421	0.374796	-0.419478	0.426206
P30419	Glycylpeptide N-tetradecanoyltransferase 1 OS=Homo sapiens GN=NMT1 PE=1 SV=2	705.368	573.99	599.372	597.934	575.961	568.045	626.243	580.646	0.374941	0.109063	0.426037
Q8NEJ9	Neuroguidin OS=Homo sapiens GN=NGDN PE=1 SV=1	568.427	608.962	523.609	611.936	746.448	546.003	567	634.796	0.375056	-0.162944	0.425903
Q9NQ88	Fructose-2,6-bisphosphatase TIGAR OS=Homo sapiens GN=TIGAR PE=1 SV=1	518.898	619.731	541.875	524.528	746.62	632.456	560.168	634.535	0.375258	-0.17984	0.42567
Q92624	Amyloid protein-binding protein 2 OS=Homo sapiens GN=APPBP2 PE=1 SV=2	607.256	577.62	484.453	618.289	797.749	528.355	556.443	648.131	0.375285	-0.220052	0.425639
Q96SK2	Transmembrane protein 209 OS=Homo sapiens GN=TMEM209 PE=1 SV=2	492.188	744.645	682.85	482.724	496.435	655.865	639.895	545.008	0.375299	0.231557	0.425623
Q9NQ29	Putative RNA-binding protein Luc7-like 1 OS=Homo sapiens GN=LUC7L PE=1 SV=1	922.113	488.889	709.471	733.82	264.812	566.547	706.825	521.726	0.375684	0.438059	0.425178
Q9ULF5	Zinc transporter ZIP10 OS=Homo sapiens GN=SLC39A10 PE=1 SV=2	453.181	753.662	739.421	388.145	556.628	633.845	648.755	526.206	0.375805	0.302046	0.425037
K7EMZ9	Protein LSM14 homolog A (Fragment) OS=Homo sapiens GN=LSM14A PE=1 SV=2	877.247	557.872	671.538	747.898	241.688	579.851	702.219	523.146	0.375857	0.424709	0.424977
E9PJN9	40S ribosomal protein S3 (Fragment) OS=Homo sapiens GN=RPS3 PE=1 SV=1	753.665	403.512	1036.79	661.884	183.087	630.885	731.321	491.952	0.376027	0.571989	0.42478
Q2NL82	Pre-rRNA-processing protein TSR1 homolog OS=Homo sapiens GN=TSR1 PE=1 SV=1	582.845	636.062	608.964	566.879	590.946	610.476	609.29	589.434	0.376291	0.0477998	0.424476
A0A087WZN1	Isocitrate dehydrogenase [NAD] subunit, mitochondrial OS=Homo sapiens GN=IDH3B PE=1 SV=1	574.386	604.008	495.052	600.432	788.278	541.323	557.815	643.344	0.37641	-0.205803	0.424339
P28845	Corticosteroid 11-beta-dehydrogenase isozyme 1 OS=Homo sapiens GN=HSD11B1 PE=1 SV=3	281.058	583.511	547.81	430.91	1114.82	583.545	470.793	709.759	0.376545	-0.592235	0.424183
J3QLM1	StAR-related lipid transfer protein 3 OS=Homo sapiens GN=STARD3 PE=1 SV=1	520.978	627.768	556.418	542.436	626.672	719.626	568.388	629.578	0.376555	-0.14751	0.424172
P27695	DNA-(apurinic or apyrimidinic site) lyase OS=Homo sapiens GN=APEX1 PE=1 SV=2	578.955	596.927	729.973	584.758	475.404	642.145	635.285	567.436	0.376567	0.162947	0.424158
F2Z2J1	Ribosomal protein S6 kinase OS=Homo sapiens GN=RPS6KA2 PE=1 SV=1	512.368	617.199	603.889	604.223	579.125	691.023	577.818	624.79	0.376701	-0.112756	0.424004
O76054	SEC14-like protein 2 OS=Homo sapiens GN=SEC14L2 PE=1 SV=1	529.563	672.98	671.35	507.489	567.6	623.265	624.631	566.118	0.376969	0.141902	0.423695
P49411	Elongation factor Tu, mitochondrial OS=Homo sapiens GN=TUFM PE=1 SV=2	645.579	561.099	748.681	570.021	409.128	684.184	651.787	554.445	0.377161	0.233356	0.423473
O00267	Transcription elongation factor SPT5 OS=Homo sapiens GN=SUPT5H PE=1 SV=1	625.84	569.793	568.229	685.187	581.829	607.899	587.954	624.972	0.377214	-0.0880875	0.423412
O14910	Protein lin-7 homolog A OS=Homo sapiens GN=LIN7A PE=1 SV=2	683.646	553.34	638.53	581.676	556.23	607.141	625.172	581.682	0.377259	0.104023	0.42336
P61313	60S ribosomal protein L15 OS=Homo sapiens GN=RPL15 PE=1 SV=2	773.751	609.307	580.823	690.958	436.085	552.518	654.627	559.854	0.377431	0.225623	0.423162
P09496	Clathrin light chain A OS=Homo sapiens GN=CLTA PE=1 SV=1	983.069	438.697	799.983	775.722	140.536	570.965	740.583	495.741	0.377546	0.579074	0.423031
P51884	Lumican OS=Homo sapiens GN=LUM PE=1 SV=2	470.069	724.766	415.041	661.952	796.951	521.688	536.626	660.197	0.37766	-0.29898	0.422899
A0A096LNX8	Scavenger receptor class F member 2 OS=Homo sapiens GN=SCARF2 PE=1 SV=1	801.569	518.364	661	664.466	447.353	560.386	660.311	557.402	0.377906	0.244428	0.422616
P31942	Heterogeneous nuclear ribonucleoprotein H3 OS=Homo sapiens GN=HNRNPH3 PE=1 SV=2	847.976	563.768	594.134	694.052	541.508	405.216	668.626	546.925	0.378041	0.289857	0.422461
G3V3D1	Epididymal secretory protein E1 (Fragment) OS=Homo sapiens GN=NPC2 PE=1 SV=1	449.133	718.499	864.791	421.792	341.751	750.405	677.474	504.649	0.378087	0.424885	0.422408
Q14114	Low-density lipoprotein receptor-related protein 8 OS=Homo sapiens GN=LRP8 PE=1 SV=4	632.741	606.858	457.344	762.05	524.457	674.508	565.648	653.671	0.378218	-0.208662	0.422258
Q96ND0	Protein FAM210A OS=Homo sapiens GN=FAM210A PE=1 SV=2	686.27	672.463	721.586	626.364	198.625	717.063	693.439	514.017	0.378295	0.431953	0.42217
Q9BZE9	Tether containing UBX domain for GLUT4 OS=Homo sapiens GN=ASPSCR1 PE=1 SV=1	605.845	602.873	693.449	621.344	465.901	628.334	634.056	571.86	0.378323	0.148948	0.422138
Q9NZE8	39S ribosomal protein L35, mitochondrial OS=Homo sapiens GN=MRPL35 PE=1 SV=3	517.422	626.843	534.225	561.315	769.07	579.288	559.497	636.558	0.378363	-0.186161	0.422091
Q13610	Periodic tryptophan protein 1 homolog OS=Homo sapiens GN=PWP1 PE=1 SV=1	486.122	662.505	503.677	542.607	781.438	600.809	550.768	641.618	0.378619	-0.22027	0.421797
P12081	Histidine--tRNA ligase, cytoplasmic OS=Homo sapiens GN=HARS PE=1 SV=2	609.408	557.631	570.857	704.374	536.654	669.413	579.299	636.814	0.378837	-0.136564	0.421548
Q71RG4	Transmembrane and ubiquitin-like domain-containing protein 2 OS=Homo sapiens GN=TMUB2 PE=1 SV=2	569.505	626.427	692.382	564.79	490.821	655.134	629.438	570.249	0.378974	0.142474	0.42139
J3KQ32	Obg-like ATPase 1 OS=Homo sapiens GN=OLA1 PE=1 SV=1	732.533	566.386	630.284	644.975	460.219	604.015	643.068	569.736	0.379039	0.174677	0.421316
P20472	Parvalbumin alpha OS=Homo sapiens GN=PVALB PE=1 SV=2	496.236	742.851	706.408	350.392	699.364	517.196	648.498	522.317	0.379427	0.312177	0.420872
P17050	Alpha-N-acetylgalactosaminidase OS=Homo sapiens GN=NAGA PE=1 SV=2	509.844	668.775	417.483	570.203	873.68	540.891	532.034	661.591	0.379429	-0.314422	0.42087
O95602	DNA-directed RNA polymerase I subunit RPA1 OS=Homo sapiens GN=POLR1A PE=1 SV=2	585.761	605.774	636.397	579.886	587.512	608.579	609.311	591.993	0.37974	0.0415989	0.420513
P13995	Bifunctional methylenetetrahydrofolate dehydrogenase/cyclohydrolase, mitochondrial OS=Homo sapiens GN=MTHFD2 PE=1 SV=2	605.592	569.93	767.445	571.251	430.305	668.484	647.656	556.68	0.379812	0.218379	0.420431
Q8WTS6	Histone-lysine N-methyltransferase SETD7 OS=Homo sapiens GN=SETD7 PE=1 SV=1	571.358	564.711	598.058	560.715	698.912	610.311	578.042	623.313	0.379878	-0.108782	0.420356
O95573	Long-chain-fatty-acid--CoA ligase 3 OS=Homo sapiens GN=ACSL3 PE=1 SV=3	535.898	635.268	569.467	591.849	670.917	593.737	580.211	618.834	0.380027	-0.0929756	0.420186
Q05655	Protein kinase C delta type OS=Homo sapiens GN=PRKCD PE=1 SV=2	613.755	556.728	833.13	547.739	353.083	708.244	667.871	536.355	0.380139	0.31638	0.420057
O15511	Actin-related protein 2/3 complex subunit 5 OS=Homo sapiens GN=ARPC5 PE=1 SV=3	726.437	565.773	626.106	629.126	473.234	614.107	639.439	572.156	0.38032	0.160399	0.419851
Q96T58	Msx2-interacting protein OS=Homo sapiens GN=SPEN PE=1 SV=1	566.132	621.525	719.774	554.641	468.665	667.076	635.81	563.461	0.38033	0.174281	0.41984
Q9BU19	Zinc finger protein 692 OS=Homo sapiens GN=ZNF692 PE=1 SV=1	654.997	487.044	562.605	556.973	739.464	621.672	568.215	639.369	0.380603	-0.170212	0.419528
Q16204	Coiled-coil domain-containing protein 6 OS=Homo sapiens GN=CCDC6 PE=1 SV=2	891.863	516.533	628.582	686.004	410.366	531.271	678.992	542.547	0.380643	0.323647	0.419482
Q9BSL1	Ubiquitin-associated domain-containing protein 1 OS=Homo sapiens GN=UBAC1 PE=1 SV=1	551.312	590.185	787.387	484.106	507.085	663.213	642.961	551.468	0.380741	0.221455	0.419371
Q92541	RNA polymerase-associated protein RTF1 homolog OS=Homo sapiens GN=RTF1 PE=1 SV=4	733.568	634.551	631.711	735.265	371.398	539.675	666.61	548.779	0.381031	0.280616	0.41904
Q07021	Complement component 1 Q subcomponent-binding protein, mitochondrial OS=Homo sapiens GN=C1QBP PE=1 SV=1	648.234	543.713	508.229	608.252	758.192	555.13	566.725	640.525	0.381035	-0.176605	0.419035
Q5SQI0	Alpha-tubulin N-acetyltransferase 1 OS=Homo sapiens GN=ATAT1 PE=1 SV=1	883.55	615.387	646.403	755.49	157.712	614.105	715.113	509.102	0.381067	0.490216	0.418999
Q05639	Elongation factor 1-alpha 2 OS=Homo sapiens GN=EEF1A2 PE=1 SV=1	762.285	608.312	569.697	668.25	468.664	560.332	646.764	565.749	0.381118	0.19308	0.41894
Q8NI37	Protein phosphatase PTC7 homolog OS=Homo sapiens GN=PPTC7 PE=2 SV=1	591.478	605.386	544.331	652.719	676.659	547.551	580.398	625.643	0.381197	-0.108296	0.41885
Q53HL2	Borealin OS=Homo sapiens GN=CDCA8 PE=1 SV=2	625.996	611.952	407.449	708.709	787.855	487.885	548.466	661.483	0.381281	-0.270302	0.418755
P43251	Biotinidase OS=Homo sapiens GN=BTD PE=1 SV=2	513.239	660.182	550.655	596.619	621.901	654.531	574.692	624.351	0.381322	-0.119568	0.418708
Q5VUJ6	Leucine-rich repeat and calponin homology domain-containing protein 2 OS=Homo sapiens GN=LRCH2 PE=2 SV=2	574.185	625.379	653.752	524.698	574.578	635.743	617.772	578.34	0.381424	0.0951577	0.418592
P26022	Pentraxin-related protein PTX3 OS=Homo sapiens GN=PTX3 PE=1 SV=3	545.975	633.837	554.614	556.378	646.835	656.414	578.142	619.876	0.381531	-0.100555	0.418471
Q9GZS1	DNA-directed RNA polymerase I subunit RPA49 OS=Homo sapiens GN=POLR1E PE=1 SV=2	610.549	624.284	634.353	614.431	506.352	623.025	623.062	581.269	0.381597	0.100169	0.418395
Q9UJU6	Drebrin-like protein OS=Homo sapiens GN=DBNL PE=1 SV=1	716.106	561.821	623.641	530.185	668.34	501.675	633.856	566.734	0.382044	0.161484	0.417886
Q08752	Peptidyl-prolyl cis-trans isomerase D OS=Homo sapiens GN=PPID PE=1 SV=3	565.756	625.572	648.369	553.828	599.054	599.551	613.232	584.144	0.382059	0.0701083	0.41787
E7EXA6	Chromosome transmission fidelity protein 18 homolog OS=Homo sapiens GN=CHTF18 PE=1 SV=2	724.742	509.884	734.202	631.023	422.552	621.285	656.276	558.287	0.382463	0.233296	0.41741
Q14966	Zinc finger protein 638 OS=Homo sapiens GN=ZNF638 PE=1 SV=2	692.434	604.017	578.156	626.203	585.083	533.752	624.869	581.679	0.382506	0.10333	0.417361
Q9NVP2	Histone chaperone ASF1B OS=Homo sapiens GN=ASF1B PE=1 SV=1	699.566	320.495	564.748	990.543	418.25	775.945	528.27	728.246	0.382643	-0.463152	0.417206
P22083	Alpha-(1,3)-fucosyltransferase 4 OS=Homo sapiens GN=FUT4 PE=2 SV=3	496.307	680.815	469.872	507.68	682.028	740.257	548.998	643.322	0.383189	-0.228738	0.416586
P53611	Geranylgeranyl transferase type-2 subunit beta OS=Homo sapiens GN=RABGGTB PE=1 SV=2	530.477	567.011	578.835	554.117	785.734	580.127	558.774	639.993	0.383287	-0.19579	0.416476
O75147	Obscurin-like protein 1 OS=Homo sapiens GN=OBSL1 PE=1 SV=4	562.977	548.629	639.665	619.314	574.242	680.421	583.757	624.659	0.383346	-0.0977008	0.416409
P46019	Phosphorylase b kinase regulatory subunit alpha, liver isoform OS=Homo sapiens GN=PHKA2 PE=1 SV=1	622.547	538.762	592.846	672.818	554.005	662.985	584.718	629.936	0.383426	-0.107464	0.416318
O75528	Transcriptional adapter 3 OS=Homo sapiens GN=TADA3 PE=1 SV=1	659.551	658.378	563.242	591.969	638.89	484.729	627.057	571.862	0.383711	0.132929	0.415996
P49189	4-trimethylaminobutyraldehyde dehydrogenase OS=Homo sapiens GN=ALDH9A1 PE=1 SV=3	521.332	560.437	633.819	540.144	693.545	648.669	571.863	627.453	0.38377	-0.133838	0.415929
Q13472	DNA topoisomerase 3-alpha OS=Homo sapiens GN=TOP3A PE=1 SV=1	544.156	652.681	524.024	571.093	680.59	619.575	573.62	623.753	0.38386	-0.120878	0.415827
H0YIS7	Protein RNASEK-C17orf49 (Fragment) OS=Homo sapiens GN=RNASEK-C17orf49 PE=4 SV=1	611.775	760.796	575.866	390.105	739.159	447.177	649.479	525.48	0.383929	0.305646	0.415749
P53992	Protein transport protein Sec24C OS=Homo sapiens GN=SEC24C PE=1 SV=3	530.776	730.94	625.772	482.85	649.911	530.832	629.163	554.531	0.384052	0.182164	0.41561
A0A0A0MTS2	Glucose-6-phosphate isomerase (Fragment) OS=Homo sapiens GN=GPI PE=1 SV=1	542.101	659.15	496.023	586.156	725.155	583.526	565.758	631.613	0.384065	-0.158854	0.415595
Q9Y276	Mitochondrial chaperone BCS1 OS=Homo sapiens GN=BCS1L PE=1 SV=1	622.968	537.742	548.006	756.763	508.113	693.601	569.572	652.826	0.384249	-0.196821	0.415388
Q5VW26	Nuclear factor 1 OS=Homo sapiens GN=NFIB PE=1 SV=1	752.998	519.305	811.413	684.881	238.772	652.995	694.572	525.549	0.384383	0.402298	0.415236
Q9NRR4	Ribonuclease 3 OS=Homo sapiens GN=DROSHA PE=1 SV=2	438.712	677.626	545.15	542.356	709.236	662.044	553.829	637.879	0.384486	-0.203841	0.415119
Q01433	AMP deaminase 2 OS=Homo sapiens GN=AMPD2 PE=1 SV=2	605.986	626.463	593.892	560.695	615.259	594.658	608.78	590.204	0.384501	0.0447082	0.415102
Q9NVK5	FGFR1 oncogene partner 2 OS=Homo sapiens GN=FGFR1OP2 PE=1 SV=1	651.181	538.658	466.34	748.249	777.062	469.689	552.06	665	0.384517	-0.26853	0.415085
P0DI82	Trafficking protein particle complex subunit 2B OS=Homo sapiens GN=TRAPPC2B PE=1 SV=1	499.865	658.864	559.493	592.198	610.657	675.49	572.741	626.115	0.384599	-0.128546	0.414992
O95372	Acyl-protein thioesterase 2 OS=Homo sapiens GN=LYPLA2 PE=1 SV=1	770.234	518.216	658.424	626.142	491.129	578.059	648.958	565.11	0.384627	0.199594	0.414961
P61764	Syntaxin-binding protein 1 OS=Homo sapiens GN=STXBP1 PE=1 SV=1	547.36	632.181	764.964	427.822	479.185	715.185	648.168	540.73	0.384694	0.261459	0.414885
B0YIW2	Apolipoprotein C-III OS=Homo sapiens GN=APOC3 PE=1 SV=1	408.055	731.945	325.647	459.693	1010.55	604.133	488.549	691.459	0.385034	-0.501141	0.414501
Q9BZE1	39S ribosomal protein L37, mitochondrial OS=Homo sapiens GN=MRPL37 PE=1 SV=2	570.463	612.153	562.532	559.947	668.877	623.917	581.716	617.58	0.385094	-0.086312	0.414434
Q9BVS4	Serine/threonine-protein kinase RIO2 OS=Homo sapiens GN=RIOK2 PE=1 SV=2	596.074	600.876	574.475	668.648	591.353	595.148	590.475	618.383	0.3852	-0.0666255	0.414314
Q9NPF5	DNA methyltransferase 1-associated protein 1 OS=Homo sapiens GN=DMAP1 PE=1 SV=1	587.414	526.815	595.795	559.298	744.469	595.83	570.008	633.199	0.385226	-0.151677	0.414284
Q8N766	ER membrane protein complex subunit 1 OS=Homo sapiens GN=EMC1 PE=1 SV=1	533.609	664.311	528.315	612.792	643.111	617.505	575.412	624.47	0.385389	-0.118037	0.414101
Q9NXS2	Glutaminyl-peptide cyclotransferase-like protein OS=Homo sapiens GN=QPCTL PE=1 SV=2	535.839	623.813	580.472	560.451	657.653	635.876	580.041	617.993	0.385475	-0.0914351	0.414003
Q3SY69	Mitochondrial 10-formyltetrahydrofolate dehydrogenase OS=Homo sapiens GN=ALDH1L2 PE=1 SV=2	555.079	624.49	588.409	595.309	614.627	625.659	589.326	611.865	0.385478	-0.0541475	0.414001
P05198	Eukaryotic translation initiation factor 2 subunit 1 OS=Homo sapiens GN=EIF2S1 PE=1 SV=3	601.44	579.48	668.284	589.519	580.793	590.664	616.402	586.992	0.385592	0.0705298	0.413872
Q92995	Ubiquitin carboxyl-terminal hydrolase 13 OS=Homo sapiens GN=USP13 PE=1 SV=2	520.387	651.818	554.49	593.933	675.242	598.34	575.565	622.505	0.385594	-0.113107	0.41387
Q9NPH3	Interleukin-1 receptor accessory protein OS=Homo sapiens GN=IL1RAP PE=1 SV=2	492.268	621.929	490.626	539.646	879.067	556.117	534.941	658.277	0.385628	-0.299315	0.413832
Q16531	DNA damage-binding protein 1 OS=Homo sapiens GN=DDB1 PE=1 SV=1	552.681	611.925	584.489	658.662	550.639	665.376	583.032	624.892	0.386226	-0.100033	0.413159
Q9NTI2	Phospholipid-transporting ATPase IB OS=Homo sapiens GN=ATP8A2 PE=1 SV=2	452.984	595.687	606.218	506.568	768.49	648.517	551.63	641.192	0.386247	-0.217055	0.413134
P52657	Transcription initiation factor IIA subunit 2 OS=Homo sapiens GN=GTF2A2 PE=1 SV=1	696.952	626.913	804.989	678.888	132.302	701.713	709.618	504.301	0.386295	0.492758	0.413081
P52789	Hexokinase-2 OS=Homo sapiens GN=HK2 PE=1 SV=2	672.244	544.041	507.819	754.134	592.675	591.661	574.701	646.157	0.386352	-0.169072	0.413017
O94967	WD repeat-containing protein 47 OS=Homo sapiens GN=WDR47 PE=1 SV=1	593.004	570.318	889.908	485.394	290.452	768.72	684.41	514.855	0.386509	0.410694	0.41284
Q68EM7	Rho GTPase-activating protein 17 OS=Homo sapiens GN=ARHGAP17 PE=1 SV=1	609.025	628.536	734.651	580.944	357.041	699.219	657.404	545.735	0.38656	0.268581	0.412783
F5H619	HEAT repeat-containing protein 5A OS=Homo sapiens GN=HEATR5A PE=1 SV=1	708.95	666.243	645.459	734.225	316.79	569.605	673.551	540.207	0.386674	0.318275	0.412655
Q8N612	FTS and Hook-interacting protein OS=Homo sapiens GN=FAM160A2 PE=1 SV=3	732.575	523.398	421.333	784.967	622.063	594.512	559.102	667.181	0.386852	-0.254966	0.412455
Q96MW7	Tigger transposable element-derived protein 1 OS=Homo sapiens GN=TIGD1 PE=1 SV=1	527.335	645.013	547.09	662.416	686.214	540.472	573.146	629.701	0.386875	-0.135764	0.412429
Q9UHA4	Ragulator complex protein LAMTOR3 OS=Homo sapiens GN=LAMTOR3 PE=1 SV=1	562.241	528.919	611.884	536.262	740.06	624.07	567.681	633.464	0.38699	-0.158181	0.4123
Q08AM6	Protein VAC14 homolog OS=Homo sapiens GN=VAC14 PE=1 SV=1	506.552	630.828	782.962	523.058	547.908	586.089	640.114	552.352	0.387345	0.212743	0.411902
J3KN59	BCL2/adenovirus E1B 19 kDa protein-interacting protein 2 OS=Homo sapiens GN=BNIP2 PE=1 SV=1	507.098	700.701	454.013	638.106	738.259	555.62	553.937	643.995	0.387456	-0.217327	0.411777
O94929	Actin-binding LIM protein 3 OS=Homo sapiens GN=ABLIM3 PE=1 SV=3	589.304	543.135	971.162	362.722	284.314	824.451	701.2	490.496	0.387512	0.515586	0.411715
Q96BT7	Alkylated DNA repair protein alkB homolog 8 OS=Homo sapiens GN=ALKBH8 PE=1 SV=2	223.608	987.855	905.421	215.036	610.083	473.663	705.628	432.927	0.387582	0.704784	0.411637
Q9BV57	1,2-dihydroxy-3-keto-5-methylthiopentene dioxygenase OS=Homo sapiens GN=ADI1 PE=1 SV=1	551.022	663.776	497.764	627.49	690.622	570.845	570.854	629.653	0.387794	-0.141434	0.411399
Q7Z7E8	Ubiquitin-conjugating enzyme E2 Q1 OS=Homo sapiens GN=UBE2Q1 PE=1 SV=1	649.831	584.358	719.676	713.549	446.474	525.74	651.288	561.921	0.387923	0.212928	0.411255
P40763	Signal transducer and activator of transcription 3 OS=Homo sapiens GN=STAT3 PE=1 SV=2	565.118	595.189	611.026	583.609	608.447	643.76	590.444	611.939	0.387981	-0.0515859	0.41119
P12268	Inosine-5'-monophosphate dehydrogenase 2 OS=Homo sapiens GN=IMPDH2 PE=1 SV=2	629.799	576.612	628.277	574.373	600.214	600.873	611.563	591.82	0.388097	0.0473416	0.41106
Q9NT99	Leucine-rich repeat-containing protein 4B OS=Homo sapiens GN=LRRC4B PE=2 SV=3	487.576	625.153	513.558	495.309	824.316	627.044	542.096	648.89	0.388131	-0.259426	0.411022
Q9BY49	Peroxisomal trans-2-enoyl-CoA reductase OS=Homo sapiens GN=PECR PE=1 SV=2	751.575	648.414	758.778	802.815	126.652	576.784	719.589	502.084	0.388184	0.519245	0.410963
Q9Y6K1	DNA (cytosine-5)-methyltransferase 3A OS=Homo sapiens GN=DNMT3A PE=1 SV=4	688.669	592.75	603.313	513.784	671.212	522.585	628.244	569.194	0.388295	0.142406	0.410838
O75427	Leucine-rich repeat and calponin homology domain-containing protein 4 OS=Homo sapiens GN=LRCH4 PE=1 SV=2	773.225	710.575	624.14	770.907	187.83	583.933	702.647	514.224	0.388311	0.450403	0.41082
B1PBA3	SKNY protein OS=Homo sapiens GN=SMPD4 PE=1 SV=1	597.496	638.564	648.779	629.247	481.44	617.471	628.28	576.053	0.388411	0.125206	0.410708
Q8NBM8	Prenylcysteine oxidase-like OS=Homo sapiens GN=PCYOX1L PE=1 SV=2	807.277	503.924	847.63	689.713	129.914	693.033	719.61	504.22	0.388454	0.513163	0.41066
Q15464	SH2 domain-containing adapter protein B OS=Homo sapiens GN=SHB PE=1 SV=2	722.654	591.193	628.767	704.985	527.002	463.924	647.538	565.304	0.388489	0.195939	0.410622
P32119	Peroxiredoxin-2 OS=Homo sapiens GN=PRDX2 PE=1 SV=5	672.082	509.925	542.716	659.756	702.249	554.745	574.908	638.916	0.388584	-0.152296	0.410515
Q9Y6Y8	SEC23-interacting protein OS=Homo sapiens GN=SEC23IP PE=1 SV=1	724.878	555.86	619.78	605.949	516.77	606.583	633.506	576.434	0.388873	0.136203	0.410192
E9PCX5	Transmembrane protein 161B OS=Homo sapiens GN=TMEM161B PE=1 SV=1	614.564	691.469	576.261	549.498	664.339	481.025	627.431	564.954	0.388913	0.151324	0.410148
Q9ULJ3	Zinc finger and BTB domain-containing protein 21 OS=Homo sapiens GN=ZBTB21 PE=1 SV=2	578.108	622.874	641.829	617.557	554.127	594.523	614.271	588.735	0.389306	0.0612551	0.409709
Q9C0B1	Alpha-ketoglutarate-dependent dioxygenase FTO OS=Homo sapiens GN=FTO PE=1 SV=3	509.856	618.996	593.638	566.404	696.313	606.627	574.164	623.115	0.389398	-0.118036	0.409607
P67809	Nuclease-sensitive element-binding protein 1 OS=Homo sapiens GN=YBX1 PE=1 SV=3	564.404	617.6	814.601	493.755	353.751	744.63	665.535	530.712	0.38949	0.326585	0.409504
O14495	Lipid phosphate phosphohydrolase 3 OS=Homo sapiens GN=PPAP2B PE=1 SV=1	894.695	520.589	611.692	682.406	450.572	501.258	675.659	544.745	0.389904	0.310712	0.409042
P49736	DNA replication licensing factor MCM2 OS=Homo sapiens GN=MCM2 PE=1 SV=4	622.928	566.277	587.088	661.421	602.362	591.891	592.098	618.558	0.389914	-0.0630739	0.409031
O00231	26S proteasome non-ATPase regulatory subunit 11 OS=Homo sapiens GN=PSMD11 PE=1 SV=3	551.071	657.987	674.594	499.871	526.197	667.998	627.884	564.689	0.39024	0.153042	0.408668
Q9H668	CST complex subunit STN1 OS=Homo sapiens GN=OBFC1 PE=1 SV=2	748.65	516.9	907.869	798.5	140.504	569.838	724.473	502.947	0.390338	0.526524	0.408559
O00399	Dynactin subunit 6 OS=Homo sapiens GN=DCTN6 PE=1 SV=1	505.936	578.076	604.319	530.667	750.079	620.563	562.777	633.77	0.390413	-0.171395	0.408475
Q5T011	Protein SZT2 OS=Homo sapiens GN=SZT2 PE=1 SV=3	537.395	579.524	536.729	542.619	819.527	576.202	551.216	646.116	0.39049	-0.229176	0.40839
Q92917	G patch domain and KOW motifs-containing protein OS=Homo sapiens GN=GPKOW PE=1 SV=2	777.803	589.967	581.91	684.187	536.612	468.324	649.893	563.041	0.390587	0.206963	0.408282
E9PL17	Polyribonucleotide 5'-hydroxyl-kinase Clp1 OS=Homo sapiens GN=CLP1 PE=1 SV=1	517.45	720.168	643.619	527.754	557.147	601.596	627.079	562.166	0.390687	0.157652	0.408171
Q9BUE0	Mediator of RNA polymerase II transcription subunit 18 OS=Homo sapiens GN=MED18 PE=1 SV=1	1006.75	443.396	757.427	733.864	135.09	627.682	735.858	498.879	0.390961	0.560739	0.407867
Q8TF01	Arginine/serine-rich protein PNISR OS=Homo sapiens GN=PNISR PE=1 SV=2	866.115	548.849	679.022	770.122	266.031	549.568	697.995	528.574	0.391133	0.401112	0.407676
Q9Y6M5	Zinc transporter 1 OS=Homo sapiens GN=SLC30A1 PE=1 SV=3	567.504	692.087	642.185	496.57	696.811	463.295	633.925	552.226	0.391188	0.199056	0.407614
P36915	Guanine nucleotide-binding protein-like 1 OS=Homo sapiens GN=GNL1 PE=1 SV=2	528.371	611.198	789.701	497.092	492.823	662.136	643.09	550.684	0.391428	0.223796	0.407348
Q6PJF5	Inactive rhomboid protein 2 OS=Homo sapiens GN=RHBDF2 PE=1 SV=2	670.432	541.714	730.318	676.225	456.413	566.3	647.488	566.313	0.391453	0.193254	0.40732
Q8N2G6	Zinc finger CCHC domain-containing protein 24 OS=Homo sapiens GN=ZCCHC24 PE=1 SV=1	492.143	913.765	564.085	370.442	638.162	513.319	656.664	507.308	0.391573	0.372295	0.407188
A0A075B716	40S ribosomal protein S17 OS=Homo sapiens GN=RPS17 PE=1 SV=1	750.082	527.18	648.868	618.618	514.939	577.536	642.043	570.364	0.391747	0.170787	0.406995
Q8ND82	Zinc finger protein 280C OS=Homo sapiens GN=ZNF280C PE=1 SV=1	843.349	554.632	578.747	646.119	536.496	482.006	658.909	554.874	0.391808	0.247919	0.406927
Q86UK7	Zinc finger protein 598 OS=Homo sapiens GN=ZNF598 PE=1 SV=1	702.091	587.068	623.751	667.625	478.353	577.48	637.637	574.486	0.39188	0.150462	0.406847
Q99594	Transcriptional enhancer factor TEF-5 OS=Homo sapiens GN=TEAD3 PE=1 SV=2	947.053	585.414	572.213	762.987	286.234	524.097	701.56	524.439	0.391956	0.419791	0.406763
A0A0A0MT83	Isovaleryl-CoA dehydrogenase, mitochondrial OS=Homo sapiens GN=IVD PE=1 SV=1	730.953	593.859	610.777	532.387	444.238	701.321	645.196	559.315	0.392063	0.206077	0.406645
Q68CZ6	HAUS augmin-like complex subunit 3 OS=Homo sapiens GN=HAUS3 PE=1 SV=1	510.485	621.168	605.37	577.012	656.145	625.373	579.008	619.51	0.392237	-0.097544	0.406452
P32004	Neural cell adhesion molecule L1 OS=Homo sapiens GN=L1CAM PE=1 SV=2	426.416	547.584	623.725	438.541	807.114	728.788	532.575	658.148	0.392697	-0.305426	0.405942
A0A0G2JH66	HLA class I histocompatibility antigen, alpha chain F OS=Homo sapiens GN=HLA-F PE=1 SV=1	591.188	586.614	559.843	559.914	694.199	610.729	579.215	621.614	0.392993	-0.10192	0.405615
Q9H6R4	Nucleolar protein 6 OS=Homo sapiens GN=NOL6 PE=1 SV=2	632.981	580.037	516.741	619.778	709.14	559.581	576.586	629.5	0.3931	-0.126669	0.405497
P26885	Peptidyl-prolyl cis-trans isomerase FKBP2 OS=Homo sapiens GN=FKBP2 PE=1 SV=2	912.392	425.517	722.002	570.548	428.947	596.442	686.637	531.979	0.393287	0.368178	0.405291
Q86Z02	Homeodomain-interacting protein kinase 1 OS=Homo sapiens GN=HIPK1 PE=1 SV=1	558.9	627.502	476.502	530.198	787.605	605.286	554.302	641.03	0.393351	-0.20972	0.40522
Q96JJ7	Protein disulfide-isomerase TMX3 OS=Homo sapiens GN=TMX3 PE=1 SV=2	519.768	685.893	714.032	386.894	567.592	668.765	639.898	541.083	0.393383	0.24199	0.405184
Q147X3	N-alpha-acetyltransferase 30 OS=Homo sapiens GN=NAA30 PE=1 SV=1	619.089	588.769	537.71	566.592	677.659	616.947	581.856	620.4	0.393457	-0.0925357	0.405102
Q9BWU1	Cyclin-dependent kinase 19 OS=Homo sapiens GN=CDK19 PE=1 SV=1	617.443	692.018	551.965	580.74	602.239	545.377	620.475	576.118	0.393758	0.107008	0.40477
O43719	HIV Tat-specific factor 1 OS=Homo sapiens GN=HTATSF1 PE=1 SV=1	680.241	516.564	750.799	642.287	456.568	593.024	649.201	563.96	0.394216	0.203074	0.404265
Q9UBQ5	Eukaryotic translation initiation factor 3 subunit K OS=Homo sapiens GN=EIF3K PE=1 SV=1	647.012	629.225	577.533	621.091	601.833	534.004	617.924	585.643	0.39435	0.0774072	0.404118
Q4G0S7	Coiled-coil domain-containing protein 152 OS=Homo sapiens GN=CCDC152 PE=2 SV=3	450.442	667.533	479.473	523.615	869.417	576.33	532.482	656.454	0.394491	-0.301961	0.403963
O00505	Importin subunit alpha-4 OS=Homo sapiens GN=KPNA3 PE=1 SV=2	495.386	727.805	672.832	488.228	553.301	618.547	632.008	553.359	0.394524	0.191727	0.403927
P19419	ETS domain-containing protein Elk-1 OS=Homo sapiens GN=ELK1 PE=1 SV=2	1004.19	697.743	585.867	971.995	85.4092	361.208	762.599	472.87	0.394856	0.689479	0.403561
Q13163	Dual specificity mitogen-activated protein kinase kinase 5 OS=Homo sapiens GN=MAP2K5 PE=1 SV=2	682.162	559.451	648.449	602.86	501.957	631.679	630.021	578.832	0.394914	0.122253	0.403498
Q9Y4J8	Dystrobrevin alpha OS=Homo sapiens GN=DTNA PE=1 SV=2	486.608	629.81	554.387	533.644	769.893	605.729	556.935	636.422	0.394918	-0.192475	0.403493
O15228	Dihydroxyacetone phosphate acyltransferase OS=Homo sapiens GN=GNPAT PE=1 SV=1	488.264	655.626	792.611	495.388	484.586	653.769	645.5	544.581	0.395111	0.245272	0.403281
Q32MZ4	Leucine-rich repeat flightless-interacting protein 1 OS=Homo sapiens GN=LRRFIP1 PE=1 SV=2	725.903	531.48	742.726	679.135	355.847	617.13	666.703	550.704	0.395184	0.275767	0.4032
Q96PK6	RNA-binding protein 14 OS=Homo sapiens GN=RBM14 PE=1 SV=2	604.605	579.647	567.901	626.622	679.635	558.994	584.051	621.75	0.39555	-0.0902411	0.402799
P53367	Arfaptin-1 OS=Homo sapiens GN=ARFIP1 PE=1 SV=2	448.655	640.707	581.154	516.875	671.76	720.155	556.839	636.263	0.395906	-0.192365	0.402408
P34932	Heat shock 70 kDa protein 4 OS=Homo sapiens GN=HSPA4 PE=1 SV=4	640.378	615.99	596.35	589.176	634.604	527.135	617.573	583.639	0.396255	0.0815342	0.402025
P0CG12	Chromosome transmission fidelity protein 8 homolog isoform 2 OS=Homo sapiens GN=CHTF8 PE=1 SV=1	1050.54	442.774	748.654	821.277	128.344	531.16	747.324	493.594	0.396258	0.598409	0.402022
Q9NYG5	Anaphase-promoting complex subunit 11 OS=Homo sapiens GN=ANAPC11 PE=1 SV=1	633.549	494.531	937.911	571.437	294.753	696.216	688.664	520.802	0.396337	0.403064	0.401936
P23786	Carnitine O-palmitoyltransferase 2, mitochondrial OS=Homo sapiens GN=CPT2 PE=1 SV=2	585.676	559.887	600.832	664.076	541.526	685.059	582.132	630.221	0.396497	-0.114512	0.40176
Q9NZQ3	NCK-interacting protein with SH3 domain OS=Homo sapiens GN=NCKIPSD PE=1 SV=1	587.583	646.128	924.313	514.643	88.0438	837.76	719.342	480.149	0.396552	0.583195	0.4017
Q9C0B5	Palmitoyltransferase ZDHHC5 OS=Homo sapiens GN=ZDHHC5 PE=1 SV=2	772.77	677.507	505.276	657.935	575.686	426.949	651.851	553.523	0.39664	0.235898	0.401603
Q9NRP4	Succinate dehydrogenase assembly factor 3, mitochondrial OS=Homo sapiens GN=SDHAF3 PE=1 SV=1	374.228	587.024	549.231	440.264	992.704	610.181	503.494	681.05	0.396803	-0.435785	0.401426
Q7Z4G1	COMM domain-containing protein 6 OS=Homo sapiens GN=COMMD6 PE=1 SV=1	596.682	439.496	665.891	567.639	652.968	710.927	567.357	643.844	0.396864	-0.182456	0.401359
O00330	Pyruvate dehydrogenase protein X component, mitochondrial OS=Homo sapiens GN=PDHX PE=1 SV=3	504.512	602.605	548.488	525.421	805.291	596.622	551.868	642.445	0.396955	-0.219248	0.401259
Q13616	Cullin-1 OS=Homo sapiens GN=CUL1 PE=1 SV=2	471.359	763.878	687.73	429.457	665.823	507.816	640.989	534.366	0.396996	0.262473	0.401214
Q96RE7	Nucleus accumbens-associated protein 1 OS=Homo sapiens GN=NACC1 PE=1 SV=1	670.728	529.047	733.33	618.093	456.183	625.868	644.369	566.715	0.397228	0.185263	0.40096
P11233	Ras-related protein Ral-A OS=Homo sapiens GN=RALA PE=1 SV=1	679.747	548.827	669.718	622.371	497.499	613.19	632.764	577.687	0.397477	0.13138	0.400688
Q96Q89	Kinesin-like protein KIF20B OS=Homo sapiens GN=KIF20B PE=1 SV=3	655.363	545.408	518.768	782.564	579.842	585.51	573.179	649.305	0.39757	-0.179909	0.400586
Q5T5H1	Alpha-endosulfine OS=Homo sapiens GN=ENSA PE=1 SV=1	818.438	633.227	536.83	641.174	636.144	351.105	662.831	542.808	0.397734	0.288201	0.400408
Q86X83	COMM domain-containing protein 2 OS=Homo sapiens GN=COMMD2 PE=1 SV=2	756.223	709.459	508.098	683.266	396.534	573.362	657.927	551.054	0.398263	0.255732	0.39983
Q96A33	Coiled-coil domain-containing protein 47 OS=Homo sapiens GN=CCDC47 PE=1 SV=1	525.25	565.876	636.487	546.954	672.338	652.557	575.871	623.95	0.398289	-0.115684	0.399801
Q53RE8	Ankyrin repeat domain-containing protein 39 OS=Homo sapiens GN=ANKRD39 PE=1 SV=1	587.371	623.453	466.918	536.937	765.451	611.069	559.248	637.819	0.399409	-0.189661	0.398582
Q5THK1	Protein PRR14L OS=Homo sapiens GN=PRR14L PE=1 SV=1	610.492	650.168	598.663	588.059	639.379	507.525	619.774	578.321	0.399537	0.0998714	0.398443
Q05932	Folylpolyglutamate synthase, mitochondrial OS=Homo sapiens GN=FPGS PE=1 SV=3	306.328	344.784	391.471	335.508	421.449	1848.17	347.527	868.376	0.399589	-1.32119	0.398387
P16083	Ribosyldihydronicotinamide dehydrogenase [quinone] OS=Homo sapiens GN=NQO2 PE=1 SV=5	603.109	617.675	662.213	484.903	541.797	675.363	627.666	567.354	0.399929	0.145746	0.398017
G3V325	Protein ATP5J2-PTCD1 OS=Homo sapiens GN=ATP5J2-PTCD1 PE=4 SV=1	608.543	637.842	611.217	528.978	657.628	539.409	619.201	575.338	0.39994	0.105996	0.398006
O43741	5'-AMP-activated protein kinase subunit beta-2 OS=Homo sapiens GN=PRKAB2 PE=1 SV=1	427.682	611.703	609.298	513.328	777.371	635.202	549.561	641.967	0.400007	-0.22422	0.397933
P68104	Elongation factor 1-alpha 1 OS=Homo sapiens GN=EEF1A1 PE=1 SV=1	716.233	591.323	591.594	648.064	504.366	580.856	633.05	577.762	0.400043	0.131843	0.397894
P55040	GTP-binding protein GEM OS=Homo sapiens GN=GEM PE=1 SV=1	553.277	588.74	777.678	481.48	514.163	668.05	639.898	554.564	0.40008	0.206488	0.397853
Q5VZL5	Zinc finger MYM-type protein 4 OS=Homo sapiens GN=ZMYM4 PE=1 SV=1	544.943	643.804	547.985	645.289	669.236	555.906	578.91	623.477	0.400143	-0.106996	0.397785
Q9Y3U8	60S ribosomal protein L36 OS=Homo sapiens GN=RPL36 PE=1 SV=3	664.099	520.334	566.987	681.738	624.159	589.908	583.807	631.935	0.400374	-0.114284	0.397534
Q9HC52	Chromobox protein homolog 8 OS=Homo sapiens GN=CBX8 PE=1 SV=3	833.064	623.973	529.41	676.284	570.524	398.456	662.149	548.421	0.400443	0.271871	0.397459
Q14999	Cullin-7 OS=Homo sapiens GN=CUL7 PE=1 SV=2	476.612	637.574	578.247	529.317	697.981	661.285	564.144	629.528	0.400511	-0.158206	0.397385
Q7L311	Armadillo repeat-containing X-linked protein 2 OS=Homo sapiens GN=ARMCX2 PE=2 SV=1	1157.51	495.853	628.508	884.033	148.703	417.159	760.623	483.298	0.40052	0.654268	0.397376
Q9UN86	Ras GTPase-activating protein-binding protein 2 OS=Homo sapiens GN=G3BP2 PE=1 SV=2	809.759	595.277	535.152	543.216	629.497	495.085	646.729	555.933	0.400611	0.218252	0.397278
Q8TAG9	Exocyst complex component 6 OS=Homo sapiens GN=EXOC6 PE=1 SV=3	549.294	632.846	560.55	571.879	670.411	609.946	580.897	617.412	0.400739	-0.0879525	0.397139
P20339	Ras-related protein Rab-5A OS=Homo sapiens GN=RAB5A PE=1 SV=2	587.615	632.725	530.627	690.552	581.844	603.91	583.655	625.435	0.40085	-0.0997442	0.397018
O15381	Nuclear valosin-containing protein-like OS=Homo sapiens GN=NVL PE=1 SV=1	578.295	616.976	634.654	589.786	575.493	608.879	609.975	591.386	0.401096	0.0446504	0.396751
O60930	Ribonuclease H1 OS=Homo sapiens GN=RNASEH1 PE=1 SV=2	716.432	532.682	407.231	729.478	766.481	503.394	552.115	666.451	0.40122	-0.27153	0.396617
Q15102	Platelet-activating factor acetylhydrolase IB subunit gamma OS=Homo sapiens GN=PAFAH1B3 PE=1 SV=1	468.967	682.127	525.78	609.238	737.32	563.041	558.958	636.533	0.401391	-0.187495	0.396433
O43184	Disintegrin and metalloproteinase domain-containing protein 12 OS=Homo sapiens GN=ADAM12 PE=1 SV=3	429.354	630.537	507.56	446.233	894.954	647.767	522.484	662.984	0.401548	-0.343589	0.396263
O95425	Supervillin OS=Homo sapiens GN=SVIL PE=1 SV=2	580.324	594.408	608.789	613.615	584.154	634.031	594.507	610.6	0.401551	-0.0385334	0.396259
P84103	Serine/arginine-rich splicing factor 3 OS=Homo sapiens GN=SRSF3 PE=1 SV=1	758.853	491.013	788.65	691.233	322.686	611.12	679.506	541.679	0.401629	0.327046	0.396175
Q9H9S3	Protein transport protein Sec61 subunit alpha isoform 2 OS=Homo sapiens GN=SEC61A2 PE=2 SV=3	1597.4	347.001	568.973	790.533	133.805	324.895	837.79	416.411	0.401865	1.00858	0.39592
P50213	Isocitrate dehydrogenase [NAD] subunit alpha, mitochondrial OS=Homo sapiens GN=IDH3A PE=1 SV=1	655.906	579.216	610.792	611.187	584.846	577.547	615.305	591.193	0.401867	0.0576711	0.395918
H0UI80	Negative elongation factor C/D OS=Homo sapiens GN=TH1L PE=1 SV=1	551.417	628.758	712.478	594.856	482.32	633.099	630.884	570.092	0.401909	0.146181	0.395872
Q9BVI4	Nucleolar complex protein 4 homolog OS=Homo sapiens GN=NOC4L PE=1 SV=1	806.819	173.036	542.358	1193.05	486.309	639.132	507.404	772.831	0.401989	-0.607018	0.395786
F5H0C4	Proteasomal ATPase-associated factor 1 OS=Homo sapiens GN=PAAF1 PE=1 SV=1	412.618	688.033	896.741	385.469	499.644	648.647	665.797	511.253	0.402392	0.381045	0.395351
P15056	Serine/threonine-protein kinase B-raf OS=Homo sapiens GN=BRAF PE=1 SV=4	727.946	635.687	636.526	673.617	318.306	645.928	666.72	545.95	0.402438	0.288311	0.395301
A0A0A0MQU4	Selenocysteine lyase OS=Homo sapiens GN=SCLY PE=1 SV=1	610.235	586.095	569.469	582.057	660.44	600.685	588.599	614.394	0.402469	-0.0618776	0.395268
Q99633	Pre-mRNA-splicing factor 18 OS=Homo sapiens GN=PRPF18 PE=1 SV=1	617.526	605.609	678.193	594.989	459.173	658.596	633.776	570.919	0.402575	0.150686	0.395154
Q0IIM8	TBC1 domain family member 8B OS=Homo sapiens GN=TBC1D8B PE=1 SV=2	474.322	645.513	588.016	569.852	683.001	626.417	569.284	626.423	0.402882	-0.13799	0.394822
Q9NUN5	Probable lysosomal cobalamin transporter OS=Homo sapiens GN=LMBRD1 PE=1 SV=1	455.864	579.644	607.434	482.233	785.928	665.157	547.647	644.439	0.403006	-0.234797	0.394688
Q96A19	Coiled-coil domain-containing protein 102A OS=Homo sapiens GN=CCDC102A PE=1 SV=2	478.451	600.118	588.608	500.008	756.138	655.662	555.725	637.269	0.403046	-0.197531	0.394645
Q8WUK0	Phosphatidylglycerophosphatase and protein-tyrosine phosphatase 1 OS=Homo sapiens GN=PTPMT1 PE=1 SV=1	408.812	717.906	862.782	408.691	471	664.167	663.167	514.619	0.403101	0.365866	0.394586
P02533	Keratin, type I cytoskeletal 14 OS=Homo sapiens GN=KRT14 PE=1 SV=4	520.518	659.793	734.991	494.291	479.558	685.434	638.434	553.094	0.403202	0.207012	0.394477
Q16512	Serine/threonine-protein kinase N1 OS=Homo sapiens GN=PKN1 PE=1 SV=2	738.511	540.91	680.737	669.705	415.163	603.679	653.386	562.849	0.403232	0.215188	0.394445
P46940	Ras GTPase-activating-like protein IQGAP1 OS=Homo sapiens GN=IQGAP1 PE=1 SV=1	633.228	553.104	578.907	591.96	658.434	602.795	588.413	617.73	0.403295	-0.0701468	0.394377
P67812	Signal peptidase complex catalytic subunit SEC11A OS=Homo sapiens GN=SEC11A PE=1 SV=1	1022.83	564.395	507.474	676.015	461.412	427.111	698.235	521.513	0.403381	0.421009	0.394284
C9JIZ6	Prosaposin OS=Homo sapiens GN=PSAP PE=1 SV=2	423.519	741.857	796.719	342.738	658.379	542.841	654.032	514.652	0.403503	0.345762	0.394154
Q9UJC5	SH3 domain-binding glutamic acid-rich-like protein 2 OS=Homo sapiens GN=SH3BGRL2 PE=1 SV=2	440.785	788.818	706.297	396.177	595.076	590.337	645.3	527.197	0.403566	0.291629	0.394086
P29084	Transcription initiation factor IIE subunit beta OS=Homo sapiens GN=GTF2E2 PE=1 SV=1	617.948	575.609	588.179	600.689	593.927	642.485	593.912	612.367	0.403691	-0.0441477	0.393951
Q96FK6	WD repeat-containing protein 89 OS=Homo sapiens GN=WDR89 PE=2 SV=1	655.456	588.457	669.318	664.875	459.256	595.252	637.744	573.128	0.403792	0.15412	0.393842
P09972	Fructose-bisphosphate aldolase C OS=Homo sapiens GN=ALDOC PE=1 SV=2	557.531	555.739	822.939	536.279	584.448	535.479	645.403	552.069	0.403813	0.225352	0.393819
Q9UNW1	Multiple inositol polyphosphate phosphatase 1 OS=Homo sapiens GN=MINPP1 PE=1 SV=1	411.282	809.104	762.077	404.426	434.298	700.777	660.821	513.167	0.40387	0.364831	0.393759
Q9Y6M4	Casein kinase I isoform gamma-3 OS=Homo sapiens GN=CSNK1G3 PE=1 SV=2	504.086	656.051	570.123	611.055	606.067	652.978	576.753	623.367	0.404092	-0.112127	0.393519
Q6P2E9	Enhancer of mRNA-decapping protein 4 OS=Homo sapiens GN=EDC4 PE=1 SV=1	630.055	624.527	599.926	574.447	645.142	523.461	618.169	581.017	0.404309	0.089423	0.393286
P15170	Eukaryotic peptide chain release factor GTP-binding subunit ERF3A OS=Homo sapiens GN=GSPT1 PE=1 SV=1	481.5	713.242	715.77	452.235	540.159	647.246	636.837	546.546	0.40484	0.22058	0.392716
H3BST1	Biogenesis of lysosome-related organelles complex 1 subunit 6 OS=Homo sapiens GN=BLOC1S6 PE=1 SV=1	431.836	807.926	706.863	375.094	647.761	535.182	648.875	519.346	0.404891	0.321246	0.392661
P51116	Fragile X mental retardation syndrome-related protein 2 OS=Homo sapiens GN=FXR2 PE=1 SV=2	776.23	574.324	569.294	596.057	556.716	552.709	639.949	568.494	0.405133	0.170812	0.392402
P50895	Basal cell adhesion molecule OS=Homo sapiens GN=BCAM PE=1 SV=2	607.92	553.341	554.279	554.331	738.231	598.458	571.847	630.34	0.405235	-0.140502	0.392293
Q9UII2	ATPase inhibitor, mitochondrial OS=Homo sapiens GN=ATPIF1 PE=1 SV=1	1249.76	523.269	620.249	1017.95	73.644	273.688	797.759	455.095	0.405416	0.809786	0.392099
Q9H6Q4	Cytosolic Fe-S cluster assembly factor NARFL OS=Homo sapiens GN=NARFL PE=1 SV=1	659.965	507.689	580.059	667.664	567.078	668.499	582.571	634.413	0.40559	-0.122989	0.391913
Q9H4A3	Serine/threonine-protein kinase WNK1 OS=Homo sapiens GN=WNK1 PE=1 SV=2	622.824	633.714	657.105	633.595	435.07	636.061	637.881	568.242	0.405693	0.166782	0.391802
Q8NCN4	E3 ubiquitin-protein ligase RNF169 OS=Homo sapiens GN=RNF169 PE=1 SV=2	931.403	553.401	620.126	783.55	276.073	521.597	701.643	527.074	0.406303	0.412733	0.39115
E5RI94	TBC1 domain family member 31 OS=Homo sapiens GN=TBC1D31 PE=1 SV=1	517.286	754.284	632.702	397.089	628.224	600.779	634.757	542.031	0.406395	0.227831	0.391052
Q6PI48	Aspartate--tRNA ligase, mitochondrial OS=Homo sapiens GN=DARS2 PE=1 SV=1	719.343	592.305	579.522	636.933	530.434	570.537	630.39	579.301	0.406537	0.121931	0.3909
Q15853	Upstream stimulatory factor 2 OS=Homo sapiens GN=USF2 PE=1 SV=1	491.427	529.334	651.614	498.161	740.328	680.942	557.458	639.81	0.407057	-0.19878	0.390344
Q9GZR5	Elongation of very long chain fatty acids protein 4 OS=Homo sapiens GN=ELOVL4 PE=1 SV=1	795.128	549.579	795.375	731.597	131.826	668.886	713.361	510.77	0.407066	0.481958	0.390335
Q99569	Plakophilin-4 OS=Homo sapiens GN=PKP4 PE=1 SV=2	700.123	513.047	511.27	695.41	656.403	577.774	574.813	643.196	0.407467	-0.162164	0.389908
O95785	Protein Wiz OS=Homo sapiens GN=WIZ PE=1 SV=2	615.548	688.198	571.749	550.259	663.211	489.573	625.165	567.681	0.407756	0.139158	0.3896
P02788	Lactotransferrin OS=Homo sapiens GN=LTF PE=1 SV=6	500.451	823.857	677.652	264.222	803.144	401.949	667.32	489.772	0.407807	0.446269	0.389546
K7EIZ3	Pleckstrin homology domain-containing family J member 1 OS=Homo sapiens GN=PLEKHJ1 PE=1 SV=1	463.306	620.376	523.532	505.751	874.554	583.374	535.738	654.56	0.407888	-0.288998	0.389459
P40123	Adenylyl cyclase-associated protein 2 OS=Homo sapiens GN=CAP2 PE=1 SV=1	587.177	650.982	602.442	523.171	612.838	606.683	613.534	580.897	0.407906	0.0788596	0.38944
Q9NRA8	Eukaryotic translation initiation factor 4E transporter OS=Homo sapiens GN=EIF4ENIF1 PE=1 SV=2	927.229	552.868	598.684	786.11	424.246	387.592	692.927	532.649	0.407941	0.379517	0.389403
Q9NR31	GTP-binding protein SAR1a OS=Homo sapiens GN=SAR1A PE=1 SV=1	646.546	531.378	537.037	800.107	544.862	615.289	571.654	653.42	0.408096	-0.192868	0.389237
O43143	Pre-mRNA-splicing factor ATP-dependent RNA helicase DHX15 OS=Homo sapiens GN=DHX15 PE=1 SV=2	592.443	603.739	591.942	589.964	623.673	605.337	596.042	606.325	0.408376	-0.0246775	0.38894
Q8WV44	E3 ubiquitin-protein ligase TRIM41 OS=Homo sapiens GN=TRIM41 PE=1 SV=3	555.195	672.356	432.966	593.134	779.947	557.642	553.506	643.574	0.408433	-0.217508	0.38888
Q96LR5	Ubiquitin-conjugating enzyme E2 E2 OS=Homo sapiens GN=UBE2E2 PE=1 SV=1	518.372	709.683	680.705	419.838	695.888	511.557	636.254	542.428	0.408461	0.230171	0.38885
P13674	Prolyl 4-hydroxylase subunit alpha-1 OS=Homo sapiens GN=P4HA1 PE=1 SV=2	526.804	638.28	537.573	553.032	732.155	598.852	567.552	628.013	0.408462	-0.146042	0.388849
Q53EZ4	Centrosomal protein of 55 kDa OS=Homo sapiens GN=CEP55 PE=1 SV=3	629.959	616.72	586.903	598.236	616.987	558.33	611.194	591.185	0.408566	0.0480211	0.388738
Q13310	Polyadenylate-binding protein 4 OS=Homo sapiens GN=PABPC4 PE=1 SV=1	660.571	522.992	528.426	663.549	736.027	525.821	570.663	641.799	0.408575	-0.169482	0.388728
Q86UA1	Pre-mRNA-processing factor 39 OS=Homo sapiens GN=PRPF39 PE=1 SV=3	655.985	570.974	506.729	671.214	678.837	549.903	577.896	633.318	0.408732	-0.132121	0.388561
A0A087WVC6	Protein-tyrosine-phosphatase OS=Homo sapiens GN=PTPRJ PE=1 SV=1	542.141	611.058	560.015	562.824	731.61	585.832	571.072	626.755	0.408763	-0.13423	0.388528
Q96EK5	KIF1-binding protein OS=Homo sapiens GN=KIF1BP PE=1 SV=1	646.644	567.339	699.76	630.672	453.715	630.906	637.915	571.764	0.408925	0.157943	0.388357
Q9BRT6	Protein LLP homolog OS=Homo sapiens GN=LLPH PE=1 SV=1	509.84	600.552	541.118	555.005	827.634	553.756	550.503	645.465	0.409007	-0.229589	0.388269
J3KN32	REST corepressor 1 OS=Homo sapiens GN=RCOR1 PE=1 SV=1	521.169	587.691	606.833	541.189	713.321	622.089	571.898	625.533	0.40917	-0.129329	0.388096
Q9BSY9	Desumoylating isopeptidase 2 OS=Homo sapiens GN=DESI2 PE=1 SV=1	482.602	693.933	904.857	377.793	245.399	844.267	693.797	489.153	0.40947	0.504227	0.387778
Q66LE6	Serine/threonine-protein phosphatase 2A 55 kDa regulatory subunit B delta isoform OS=Homo sapiens GN=PPP2R2D PE=2 SV=1	462.912	708.405	764.411	359.761	646.699	579.131	645.243	528.53	0.409583	0.287857	0.387658
Q14BN4	Sarcolemmal membrane-associated protein OS=Homo sapiens GN=SLMAP PE=1 SV=1	563.529	591.169	623.926	616.912	592.446	626.583	592.875	611.98	0.409683	-0.0457577	0.387553
E9PAU2	Ribonucleoprotein PTB-binding 1 OS=Homo sapiens GN=RAVER1 PE=1 SV=1	587.521	547.428	598.76	580.193	717.002	579.699	577.903	625.631	0.409851	-0.114485	0.387374
Q9NX24	H/ACA ribonucleoprotein complex subunit 2 OS=Homo sapiens GN=NHP2 PE=1 SV=1	652.877	500.536	558.573	814.039	571.844	583.526	570.662	656.47	0.409897	-0.202092	0.387325
J3QK89	Calcium homeostasis endoplasmic reticulum protein OS=Homo sapiens GN=CHERP PE=1 SV=1	549.139	613.256	602.98	580.333	625.383	630.214	588.458	611.977	0.410059	-0.056537	0.387154
Q6DCA0	AMMECR1-like protein OS=Homo sapiens GN=AMMECR1L PE=1 SV=1	755.893	542.788	750.777	734.13	281.689	600.305	683.153	538.708	0.410165	0.342706	0.387042
Q9NUU6	Inactive ubiquitin thioesterase FAM105A OS=Homo sapiens GN=FAM105A PE=2 SV=1	484.062	709.97	781.355	559.504	351.353	694.527	658.463	535.128	0.410422	0.299217	0.386769
Q6PI26	Protein SHQ1 homolog OS=Homo sapiens GN=SHQ1 PE=1 SV=2	477.414	616.28	516.218	511.791	877.332	574.561	536.637	654.561	0.410878	-0.286581	0.386287
J3KND3	Myosin light polypeptide 6 OS=Homo sapiens GN=MYL6 PE=1 SV=1	632.222	613.918	643.633	615.363	639.986	459.59	629.924	571.646	0.410898	0.140056	0.386266
Q96IY1	Kinetochore-associated protein NSL1 homolog OS=Homo sapiens GN=NSL1 PE=1 SV=3	767.512	479.791	871.487	530.32	187.439	803.582	706.263	507.113	0.410983	0.477898	0.386177
Q9H172	ATP-binding cassette sub-family G member 4 OS=Homo sapiens GN=ABCG4 PE=1 SV=2	20.6304	23.8598	29.8459	34.6336	86.1081	3522.54	24.7787	1214.43	0.410993	-5.61503	0.386166
Q13769	THO complex subunit 5 homolog OS=Homo sapiens GN=THOC5 PE=1 SV=2	509.126	647.265	575.705	584.748	610.024	669.95	577.365	621.574	0.41101	-0.106441	0.386148
O00233	26S proteasome non-ATPase regulatory subunit 9 OS=Homo sapiens GN=PSMD9 PE=1 SV=3	842.228	571.629	579.508	712.233	514.748	431.049	664.455	552.676	0.411168	0.265737	0.385981
Q9C0C4	Semaphorin-4C OS=Homo sapiens GN=SEMA4C PE=1 SV=2	369.794	638.515	508.312	443.578	984.527	601.19	505.54	676.432	0.411275	-0.420118	0.385867
P11047	Laminin subunit gamma-1 OS=Homo sapiens GN=LAMC1 PE=1 SV=3	602.147	531.152	631.123	608.397	646.194	603.978	588.141	619.523	0.411488	-0.0749953	0.385643
Q9UKR5	Probable ergosterol biosynthetic protein 28 OS=Homo sapiens GN=C14orf1 PE=1 SV=1	579.244	610.357	539.529	756.503	557.964	602.399	576.377	638.955	0.411554	-0.148702	0.385573
Q92876	Kallikrein-6 OS=Homo sapiens GN=KLK6 PE=1 SV=1	444.446	581.192	587.807	450.553	821.5	683.015	537.815	651.689	0.411848	-0.277074	0.385263
H3BMS5	PH domain leucine-rich repeat-containing protein phosphatase 2 OS=Homo sapiens GN=PHLPP2 PE=1 SV=1	382.113	762.972	409.928	577.932	881.192	543.81	518.338	667.645	0.411988	-0.365188	0.385116
Q13426	DNA repair protein XRCC4 OS=Homo sapiens GN=XRCC4 PE=1 SV=2	374.975	891.362	726.771	276.408	596.35	602.023	664.369	491.594	0.412025	0.434519	0.385076
Q96FQ6	Protein S100-A16 OS=Homo sapiens GN=S100A16 PE=1 SV=1	835.761	516.22	736.647	742.924	239.593	608.142	696.209	530.22	0.412116	0.392931	0.384981
Q99732	Lipopolysaccharide-induced tumor necrosis factor-alpha factor OS=Homo sapiens GN=LITAF PE=1 SV=2	724.068	545.929	768.33	699.358	279.99	638.831	679.442	539.393	0.412217	0.333015	0.384874
Q9Y5N6	Origin recognition complex subunit 6 OS=Homo sapiens GN=ORC6 PE=1 SV=1	877.762	464.549	842.71	801.519	127.724	589.298	728.34	506.18	0.41225	0.524961	0.384839
Q8N8S7	Protein enabled homolog OS=Homo sapiens GN=ENAH PE=1 SV=2	437.848	801.632	703.661	351.566	600.994	610.066	647.713	520.876	0.412257	0.314417	0.384832
O95352	Ubiquitin-like modifier-activating enzyme ATG7 OS=Homo sapiens GN=ATG7 PE=1 SV=1	517.711	696.976	672.432	436.64	601.181	625.381	629.039	554.401	0.412438	0.182222	0.384641
Q8NHH9	Atlastin-2 OS=Homo sapiens GN=ATL2 PE=1 SV=2	671.651	624.796	563.433	594.718	541.692	616.77	619.96	584.393	0.412496	0.0852359	0.38458
Q9NXD2	Myotubularin-related protein 10 OS=Homo sapiens GN=MTMR10 PE=1 SV=3	366.081	659.558	507.862	464.443	957.021	592.038	511.167	671.167	0.412756	-0.392877	0.384306
Q9NYB0	Telomeric repeat-binding factor 2-interacting protein 1 OS=Homo sapiens GN=TERF2IP PE=1 SV=1	683.507	512.633	731.424	648.072	520.761	541.649	642.521	570.161	0.412919	0.172376	0.384135
P69905	Hemoglobin subunit alpha OS=Homo sapiens GN=HBA1 PE=1 SV=2	481.118	514.896	689.293	536.938	718.489	660.318	561.769	638.582	0.412942	-0.184894	0.384111
Q13905	Rap guanine nucleotide exchange factor 1 OS=Homo sapiens GN=RAPGEF1 PE=1 SV=3	685.953	511.054	519.406	750.063	524.296	683.525	572.138	652.628	0.412991	-0.189898	0.384059
O75131	Copine-3 OS=Homo sapiens GN=CPNE3 PE=1 SV=1	510.924	654.96	740.171	538.583	486.415	651.891	635.352	558.963	0.413099	0.184802	0.383946
Q7Z6B7	SLIT-ROBO Rho GTPase-activating protein 1 OS=Homo sapiens GN=SRGAP1 PE=1 SV=1	555.979	610.887	555.717	616.6	721.38	544.448	574.194	627.476	0.413391	-0.128021	0.383639
P61513	60S ribosomal protein L37a OS=Homo sapiens GN=RPL37A PE=1 SV=2	662.102	568.975	673.506	673.223	492.729	565.396	634.861	577.116	0.41341	0.13758	0.383619
O60885	Bromodomain-containing protein 4 OS=Homo sapiens GN=BRD4 PE=1 SV=2	552.223	600.63	536.163	564.466	775.642	565.735	563.006	635.281	0.413452	-0.174245	0.383575
Q8IUX4	DNA dC->dU-editing enzyme APOBEC-3F OS=Homo sapiens GN=APOBEC3F PE=1 SV=3	560.405	683.636	648.189	546.739	470.968	677.144	630.743	564.95	0.413639	0.158928	0.383378
K7EM18	Eukaryotic translation initiation factor 1 OS=Homo sapiens GN=EIF1 PE=1 SV=1	476.184	623.805	542.545	501.358	812.794	616.129	547.512	643.427	0.413675	-0.232887	0.38334
Q96RT1	Protein LAP2 OS=Homo sapiens GN=ERBB2IP PE=1 SV=2	715.258	605.652	564.195	599.581	621.628	506.552	628.368	575.92	0.414002	0.125741	0.382998
P43897	Elongation factor Ts, mitochondrial OS=Homo sapiens GN=TSFM PE=1 SV=2	566.898	525.686	927.106	582.085	371.463	643.509	673.23	532.353	0.414056	0.338718	0.38294
Q12923	Tyrosine-protein phosphatase non-receptor type 13 OS=Homo sapiens GN=PTPN13 PE=1 SV=2	398.422	564.144	501.761	469.887	1107.63	517.914	488.109	698.475	0.414082	-0.517006	0.382914
Q16825	Tyrosine-protein phosphatase non-receptor type 21 OS=Homo sapiens GN=PTPN21 PE=1 SV=2	413.719	741.115	850.45	352.447	419.531	745.153	668.428	505.71	0.414261	0.402462	0.382725
Q8N556	Actin filament-associated protein 1 OS=Homo sapiens GN=AFAP1 PE=1 SV=2	783.908	549.025	690.563	722.13	321.868	596.465	674.499	546.821	0.414602	0.302746	0.382368
Q8N3J3	Uncharacterized protein C17orf53 OS=Homo sapiens GN=C17orf53 PE=1 SV=1	399.049	586.191	593.856	433.39	869.071	677.565	526.365	660.009	0.414769	-0.326421	0.382194
P03915	NADH-ubiquinone oxidoreductase chain 5 OS=Homo sapiens GN=MT-ND5 PE=1 SV=2	725.335	470.001	818.684	520.82	370.645	724.263	671.34	538.576	0.415056	0.317894	0.381893
Q9Y3Q3	Transmembrane emp24 domain-containing protein 3 OS=Homo sapiens GN=TMED3 PE=1 SV=1	656.896	638.623	648.999	631.841	385.38	660.264	648.173	559.162	0.415118	0.213112	0.381829
Q92625	Ankyrin repeat and SAM domain-containing protein 1A OS=Homo sapiens GN=ANKS1A PE=1 SV=4	558.465	614.137	508.723	598.279	786.653	533.195	560.441	639.376	0.415142	-0.1901	0.381804
Q9Y3P9	Rab GTPase-activating protein 1 OS=Homo sapiens GN=RABGAP1 PE=1 SV=3	602.274	535.405	770.675	533.303	579.055	581.294	636.118	564.551	0.415208	0.172191	0.381734
O95168	NADH dehydrogenase [ubiquinone] 1 beta subcomplex subunit 4 OS=Homo sapiens GN=NDUFB4 PE=1 SV=3	487.032	628.599	509.174	504.132	848.768	594.51	541.602	649.136	0.415317	-0.261289	0.38162
P42765	3-ketoacyl-CoA thiolase, mitochondrial OS=Homo sapiens GN=ACAA2 PE=1 SV=2	586.164	579.661	599.014	577.399	662.099	602.398	588.28	613.965	0.415332	-0.0616543	0.381605
O15254	Peroxisomal acyl-coenzyme A oxidase 3 OS=Homo sapiens GN=ACOX3 PE=1 SV=2	688.805	602.828	630.929	656.603	435.213	618.794	640.854	570.203	0.415559	0.168519	0.381367
P30711	Glutathione S-transferase theta-1 OS=Homo sapiens GN=GSTT1 PE=1 SV=4	472.679	598.647	639.9	554.962	657.929	669.092	570.409	627.328	0.415577	-0.137223	0.381348
Q96G46	tRNA-dihydrouridine(47) synthase [NAD(P)(+)]-like OS=Homo sapiens GN=DUS3L PE=1 SV=2	778.139	624.767	540.991	681.4	539.383	468.425	647.966	563.069	0.415728	0.202605	0.381191
Q92626	Peroxidasin homolog OS=Homo sapiens GN=PXDN PE=1 SV=2	500.859	738.604	648.791	461.01	604.171	592.996	629.418	552.726	0.415939	0.187455	0.38097
Q12765	Secernin-1 OS=Homo sapiens GN=SCRN1 PE=1 SV=2	558.688	612.773	702.519	547.851	526.366	647.119	624.66	573.779	0.416082	0.122576	0.380821
Q9H944	Mediator of RNA polymerase II transcription subunit 20 OS=Homo sapiens GN=MED20 PE=1 SV=1	825.201	546.396	691.841	737.454	264.669	606.989	687.813	536.371	0.416174	0.358786	0.380726
Q99627	COP9 signalosome complex subunit 8 OS=Homo sapiens GN=COPS8 PE=1 SV=1	513.605	582.601	564.733	500.864	794.972	625.944	553.646	640.593	0.416381	-0.210445	0.380509
O15047	Histone-lysine N-methyltransferase SETD1A OS=Homo sapiens GN=SETD1A PE=1 SV=3	524.765	619.023	576.988	566.248	715.648	589.182	573.592	623.693	0.416397	-0.12081	0.380492
P26196	Probable ATP-dependent RNA helicase DDX6 OS=Homo sapiens GN=DDX6 PE=1 SV=2	527.511	612.685	616.692	597.05	624.315	624.96	585.629	615.442	0.41648	-0.0716345	0.380406
Q9Y5L4	Mitochondrial import inner membrane translocase subunit Tim13 OS=Homo sapiens GN=TIMM13 PE=1 SV=1	601.336	602.174	636.307	544.612	637.053	573.009	613.272	584.891	0.416632	0.0683594	0.380247
Q9BWM7	Sideroflexin-3 OS=Homo sapiens GN=SFXN3 PE=1 SV=2	657.52	505.53	580.426	637.32	565.733	699.266	581.159	634.106	0.416855	-0.125793	0.380015
Q9Y3A0	Ubiquinone biosynthesis protein COQ4 homolog, mitochondrial OS=Homo sapiens GN=COQ4 PE=1 SV=3	118.514	192.239	321.717	163.791	283.185	2585.41	210.823	1010.8	0.416942	-2.26138	0.379924
A8MUM1	Protein TSSC1 OS=Homo sapiens GN=TSSC1 PE=1 SV=2	543.205	651.923	765.633	567.108	365.333	703.863	653.587	545.435	0.416955	0.260973	0.37991
P38432	Coilin OS=Homo sapiens GN=COIL PE=1 SV=1	764.288	563.22	620.56	696.244	464.538	540.913	649.356	567.232	0.417166	0.195072	0.379691
Q9UM11	Fizzy-related protein homolog OS=Homo sapiens GN=FZR1 PE=1 SV=2	712.116	377.605	598.131	661.405	628.606	697.254	562.617	662.422	0.417203	-0.235596	0.379652
Q9C0B7	Transport and Golgi organization protein 6 homolog OS=Homo sapiens GN=TANGO6 PE=1 SV=2	553.015	576.61	609.284	580.122	581.731	712.17	579.636	624.674	0.417211	-0.107957	0.379644
Q12899	Tripartite motif-containing protein 26 OS=Homo sapiens GN=TRIM26 PE=1 SV=1	595.572	559.41	617.926	650.679	568.085	639.685	590.969	619.483	0.417253	-0.067982	0.379601
Q9Y251	Heparanase OS=Homo sapiens GN=HPSE PE=1 SV=2	510.729	644.581	551.431	529.228	679.418	668.124	568.914	625.59	0.417352	-0.137008	0.379497
Q5SRD1	Putative mitochondrial import inner membrane translocase subunit Tim23B OS=Homo sapiens GN=TIMM23B PE=5 SV=2	607.308	683.449	559.425	572.68	589.497	578.175	616.727	580.117	0.417655	0.0882885	0.379182
P49354	Protein farnesyltransferase/geranylgeranyltransferase type-1 subunit alpha OS=Homo sapiens GN=FNTA PE=1 SV=1	420.958	694.32	539.158	539.838	717.886	658.046	551.478	638.59	0.417852	-0.211586	0.378977
P53618	Coatomer subunit beta OS=Homo sapiens GN=COPB1 PE=1 SV=3	486.115	618.619	611.421	547.145	653.7	672.846	572.052	624.564	0.41788	-0.126703	0.378948
Q14129	Protein DGCR6 OS=Homo sapiens GN=DGCR6 PE=1 SV=3	819.832	585.986	660.827	751.023	250.496	601.08	688.882	534.2	0.417914	0.366877	0.378913
E9PL71	Elongation factor 1-delta (Fragment) OS=Homo sapiens GN=EEF1D PE=1 SV=1	768.589	573.304	588.289	669.862	507.519	534.117	643.394	570.5	0.418145	0.173476	0.378673
Q8IW19	Aprataxin and PNK-like factor OS=Homo sapiens GN=APLF PE=1 SV=1	608.745	610.098	482.091	630.337	750.537	530.432	566.978	637.102	0.418175	-0.168232	0.378642
A0A0D2X7Z3	Cryptochrome-2 OS=Homo sapiens GN=CRY2 PE=1 SV=1	607.748	472.552	649.878	713.774	540.934	678.666	576.726	644.458	0.418234	-0.1602	0.378581
O95965	Integrin beta-like protein 1 OS=Homo sapiens GN=ITGBL1 PE=2 SV=1	637.036	457.209	1043.74	462.91	209.763	804.458	712.661	492.377	0.418579	0.533453	0.378223
Q8IX90	Spindle and kinetochore-associated protein 3 OS=Homo sapiens GN=SKA3 PE=1 SV=2	579.955	560.155	550.315	612.993	784.401	524.377	563.475	640.59	0.418848	-0.185051	0.377943
Q9UL03	Integrator complex subunit 6 OS=Homo sapiens GN=INTS6 PE=1 SV=1	583.345	641.888	625.321	508.094	585.503	638.721	616.851	577.439	0.418941	0.0952535	0.377847
Q15051	IQ calmodulin-binding motif-containing protein 1 OS=Homo sapiens GN=IQCB1 PE=1 SV=1	611.186	605.799	535.407	621.959	674.367	564.745	584.13	620.357	0.419136	-0.0868085	0.377645
Q9BQD7	Protein FAM173A OS=Homo sapiens GN=FAM173A PE=2 SV=1	538.351	502.404	547.327	422.946	885.602	685.067	529.36	664.538	0.419288	-0.328102	0.377488
P35790	Choline kinase alpha OS=Homo sapiens GN=CHKA PE=1 SV=3	638.207	592.71	678.969	671.625	461.968	588.128	636.628	573.907	0.419317	0.149633	0.377457
P60709	Actin, cytoplasmic 1 OS=Homo sapiens GN=ACTB PE=1 SV=1	696.878	545.048	637.066	590.981	562.045	592.134	626.331	581.72	0.419914	0.1066	0.37684
Q01518	Adenylyl cyclase-associated protein 1 OS=Homo sapiens GN=CAP1 PE=1 SV=5	713.242	560.578	714.291	694.516	350.949	617.101	662.704	554.189	0.420127	0.257986	0.376619
Q86UE4	Protein LYRIC OS=Homo sapiens GN=MTDH PE=1 SV=2	561.533	637.155	639.407	544.854	595.984	609.659	612.698	583.499	0.420314	0.0704456	0.376426
O60711	Leupaxin OS=Homo sapiens GN=LPXN PE=1 SV=1	1149.51	430.282	639.964	802.178	279.733	418.845	739.919	500.252	0.420621	0.564712	0.376109
O00463	TNF receptor-associated factor 5 OS=Homo sapiens GN=TRAF5 PE=1 SV=2	476.268	621.372	564.183	520.06	791.8	603.15	553.941	638.337	0.420687	-0.204586	0.376041
P78345	Ribonuclease P protein subunit p38 OS=Homo sapiens GN=RPP38 PE=1 SV=2	767.183	728.157	462.674	469.455	714.207	419.425	652.671	534.362	0.421155	0.288538	0.375558
O14907	Tax1-binding protein 3 OS=Homo sapiens GN=TAX1BP3 PE=1 SV=2	538.036	749.264	609.668	428.824	680.495	529.298	632.323	546.206	0.421204	0.211217	0.375508
Q92552	28S ribosomal protein S27, mitochondrial OS=Homo sapiens GN=MRPS27 PE=1 SV=3	492.46	699.924	704.765	525.571	508.655	639.259	632.383	557.828	0.421375	0.180978	0.375331
P43360	Melanoma-associated antigen 6 OS=Homo sapiens GN=MAGEA6 PE=1 SV=1	585.599	618.695	488.321	538.755	755.517	604.825	564.205	633.032	0.421442	-0.166059	0.375262
Q8NEL9	Phospholipase DDHD1 OS=Homo sapiens GN=DDHD1 PE=1 SV=2	502.513	628.011	605.521	657.65	551.903	671.569	578.682	627.041	0.421445	-0.115789	0.375259
[truncated: 5,538 more rows]

## Sheet: Phos
Protein	Description	Annotated Sequence	DeltaM [ppm]	PhosphoRS: Best Site Probabilities	(+)(+)1	(+)(+)2	(+)(+)3	(+)(-)1	(+)(-)2	(+)(-)3	AVG (+)(+)	AVG (+)(-)	t.test p-value	log 2 (+)(+)/(-)(-)	(-)log p-value
Q13595	Transformer-2 protein homolog alpha OS=Homo sapiens GN=TRA2A PE=1 SV=1	[R].rRsPsPYYSR.[GY]	0.731224	S5(Phospho): 99.75; Y7(Phospho): 97.47	1.58915	1.45956	0.58256	181.004	0.609314	17.4225	1.21042	66.3454	0.375059	-5.77641	0.425901	TRA2A
P62995	Transformer-2 protein homolog beta OS=Homo sapiens GN=TRA2B PE=1 SV=1	[R].rRsPsPYYSR.[GY]	0.731224	S5(Phospho): 99.75; Y7(Phospho): 97.47	1.58915	1.45956	0.58256	181.004	0.609314	17.4225	1.21042	66.3454	0.375059	-5.77641	0.425901	TRA2B
P35606	Coatomer subunit beta' OS=Homo sapiens GN=COPB2 PE=1 SV=2	[R].sTAQQELDGkPAsPTPVIVASHTANkEEk.[QS]	1.42982	S13(Phospho): 50; T15(Phospho): 50	1.45311	2.62573	0.532692	147.283	22.1038	29.2645	1.53718	66.2173	0.25202	-5.42885	0.598566	COPB2
Q14103	Heterogeneous nuclear ribonucleoprotein D0 OS=Homo sapiens GN=HNRNPD PE=1 SV=1	[K].iDASkNEEDEGHSNSsPR.[H]	-0.742898	S15(Phospho): 49.26; S16(Phospho): 49.26	1.16403	3.10967	1.19481	172.57	0.446317	25.7455	1.82284	66.254	0.352754	-5.18375	0.452528	HNRNPD
Q13595	Transformer-2 protein homolog alpha OS=Homo sapiens GN=TRA2A PE=1 SV=1	[R].rRsPsPYYSR.[GY]	0.44479	S3(Phospho): 99.39; S5(Phospho): 99.89	1.4888	3.54498	0.545776	183.643	0.570841	14.2146	1.85985	66.1428	0.388929	-5.15232	0.41013	TRA2A
P62995	Transformer-2 protein homolog beta OS=Homo sapiens GN=TRA2B PE=1 SV=1	[R].rRsPsPYYSR.[GY]	0.44479	S3(Phospho): 99.39; S5(Phospho): 99.89	1.4888	3.54498	0.545776	183.643	0.570841	14.2146	1.85985	66.1428	0.388929	-5.15232	0.41013	TRA2B
P17096	High mobility group protein HMG-I/HMG-Y OS=Homo sapiens GN=HMGA1 PE=1 SV=3	[K].kLEkEEEEGISQEsSEEEQ.[-]	-1.15562	S14(Phospho): 50; S15(Phospho): 50	0.627206	5.71169	2.87407	141.044	0.240485	57.5194	3.07099	66.2679	0.262079	-4.43154	0.581568	HMGA1
P06400	Retinoblastoma-associated protein OS=Homo sapiens GN=RB1 PE=1 SV=2	[K].tLQTDSIDSFETQRtPRk.[S]	-1.66701	T15(Phospho): 99.97	3.88147	7.0137	1.4229	1.56222	124.218	67.5614	4.10602	64.4473	0.230575	-3.97231	0.637187	RB1
P06400	Retinoblastoma-associated protein OS=Homo sapiens GN=RB1 PE=1 SV=2	[R].eGPTDHLESAcPLNLPLQNNHTAADMYLsPVRsPk.[K]	1.11288	S29(Phospho): 98.56; S33(Phospho): 100	6.14929	3.03115	3.28569	82.1974	74.078	35.2086	4.15538	63.828	0.0536528	-3.94114	1.27041	RB1
M0R088	Serine/arginine repetitive matrix protein 1 (Fragment) OS=Homo sapiens GN=SRRM1 PE=1 SV=1	[R].rYsPsPPPk.[R]	-0.145474	Y2(Phospho): 50.11; S3(Phospho): 50.11; S5(Phospho): 99.77	7.00615	0.584147	5.32577	162.535	0.555051	29.6153	4.30536	64.235	0.352364	-3.89916	0.453008	SRRM1
A9Z1X7	Serine/arginine repetitive matrix protein 1 OS=Homo sapiens GN=SRRM1 PE=1 SV=1	[R].rYsPsPPPk.[R]	-0.145474	Y2(Phospho): 50.11; S3(Phospho): 50.11; S5(Phospho): 99.77	7.00615	0.584147	5.32577	162.535	0.555051	29.6153	4.30536	64.235	0.352364	-3.89916	0.453008	SRRM1
Q14103	Heterogeneous nuclear ribonucleoprotein D0 OS=Homo sapiens GN=HNRNPD PE=1 SV=1	[K].iDASkNEEDEGHSNsSPR.[H]	-4.166	S15(Phospho): 48.63; S16(Phospho): 48.63	2.87108	8.09513	2.28717	180.472	0.238113	14.2562	4.41779	64.9887	0.405193	-3.87879	0.392338	HNRNPD
P06400	Retinoblastoma-associated protein OS=Homo sapiens GN=RB1 PE=1 SV=2	[R].eGPTDHLESAcPLNLPLQNNHTAADMYLsPVRsPk.[K]	5.32283	Y27(Phospho): 53.91; S29(Phospho): 53.91; S33(Phospho): 91.76	3.7562	6.78733	3.67188	82.4275	69.4564	39.8601	4.73847	63.9147	0.0416438	-3.75365	1.38045	RB1
P06400	Retinoblastoma-associated protein OS=Homo sapiens GN=RB1 PE=1 SV=2	[R].lFLDHDkTLQTDSIDsFETQRTPR.[K]	0.188656	T22(Phospho): 82.05	5.37735	7.47439	1.51636	111.603	66.7072	13.2574	4.78937	63.8558	0.172838	-3.73691	0.76236	RB1
P17096	High mobility group protein HMG-I/HMG-Y OS=Homo sapiens GN=HMGA1 PE=1 SV=3	[K].kLEkEEEEGISQEssEEEQ.[-]	1.14273	S14(Phospho): 99.54; S15(Phospho): 99.91	7.46312	5.42589	2.67858	166.015	7.41971	19.8874	5.1892	64.4408	0.364575	-3.63439	0.438213	HMGA1
P06400	Retinoblastoma-associated protein OS=Homo sapiens GN=RB1 PE=1 SV=2	[R].iPGGNIYIsPLksPYk.[I]	0.267638	Y7(Phospho): 50; S9(Phospho): 50; S13(Phospho): 98.51	5.23198	6.48942	5.99666	42.8873	103.192	40.9867	5.90602	62.3554	0.109739	-3.40026	0.959638	RB1
P23193	Transcription elongation factor A protein 1 OS=Homo sapiens GN=TCEA1 PE=1 SV=2	[K].kkEPAITSQNsPEAR.[E]	-0.275634	S11(Phospho): 97.73	3.3443	6.04305	8.70444	158.612	1.28228	29.301	6.0306	63.065	0.360251	-3.38647	0.443395	TCEA1
G3V4C1	Heterogeneous nuclear ribonucleoproteins C1/C2 OS=Homo sapiens GN=HNRNPC PE=1 SV=1	[K].nDksEEEQSSSSVk.[K]	0.842118	S4(Phospho): 99.97	7.92263	7.32707	4.42415	165.781	3.94387	21.3479	6.55795	63.6911	0.381243	-3.27977	0.418798	HNRNPC
B4DY08	Heterogeneous nuclear ribonucleoproteins C1/C2 OS=Homo sapiens GN=HNRNPC PE=1 SV=1	[K].nDksEEEQSSSSVk.[K]	0.842118	S4(Phospho): 99.97	7.92263	7.32707	4.42415	165.781	3.94387	21.3479	6.55795	63.6911	0.381243	-3.27977	0.418798	HNRNPC
P28749	Retinoblastoma-like protein 1 OS=Homo sapiens GN=RBL1 PE=1 SV=3	[K].vkSPVSLTAHsLIGAsPk.[Q]	0.954199	S3(Phospho): 82.69; S16(Phospho): 99.99	8.16903	8.32259	4.74366	80.4417	80.9094	25.5183	7.07843	62.2898	0.0947186	-3.1375	1.02356	RBL1
Q9UHB6	LIM domain and actin-binding protein 1 OS=Homo sapiens GN=LIMA1 PE=1 SV=1	[K].sEVQQPVHPkPLsPDSR.[A]	-0.12511	S13(Phospho): 98.78	6.50037	10.7399	5.52933	157.391	8.13545	24.1339	7.58986	63.22	0.360657	-3.05823	0.442906	LIMA1
P06400	Retinoblastoma-associated protein OS=Homo sapiens GN=RB1 PE=1 SV=2	[R].iPGGNIYIsPLksPYk.[I]	0.356558	S9(Phospho): 100; S13(Phospho): 99.58	10.3972	5.13449	6.98942	48.0532	87.6943	49.8463	7.50704	61.8646	0.0503337	-3.0428	1.29814	RB1
P06400	Retinoblastoma-associated protein OS=Homo sapiens GN=RB1 PE=1 SV=2	[R].iPGGNIYIsPLk.[S]	-1.25093	S9(Phospho): 100	12.6868	4.82556	7.88157	31.9407	103.478	47.3846	8.46463	60.9345	0.135648	-2.84774	0.867587	RB1
P11388	DNA topoisomerase 2-alpha OS=Homo sapiens GN=TOP2A PE=1 SV=3	[K].ikNENTEGsPQEDGVELEGLk.[Q]	-3.63252	S9(Phospho): 98.46	5.2629	13.1086	8.92449	121.409	30.5086	33.5357	9.09867	61.8177	0.21843	-2.76429	0.660687	TOP2A
P06748	Nucleophosmin OS=Homo sapiens GN=NPM1 PE=1 SV=2	[K].cGSGPVHIsGQHLVAVEEDAEsEDEEEEDVk.[L]	5.72493	S9(Phospho): 95.18; S22(Phospho): 99.7	3.62652	22.1034	3.98214	8.99188	29.9158	159.534	9.90403	66.1471	0.354474	-2.73959	0.450416	NPM1
E5RI98	Nucleophosmin (Fragment) OS=Homo sapiens GN=NPM1 PE=1 SV=1	[K].cGSGPVHIsGQHLVAVEEDAEsEDEEEEDVk.[L]	5.72493	S9(Phospho): 95.18; S22(Phospho): 99.7	3.62652	22.1034	3.98214	8.99188	29.9158	159.534	9.90403	66.1471	0.354474	-2.73959	0.450416	NPM1
Q15149	Plectin OS=Homo sapiens GN=PLEC PE=1 SV=3	[R].sSSVGssSSYPISPAVSR.[T]	-0.0768316	S6(Phospho): 74.47; S7(Phospho): 74.47	16.5005	7.92109	9.85699	27.5158	20.7026	140.895	11.4262	63.0378	0.316356	-2.46387	0.499824	PLEC
Q9C0C7	Activating molecule in BECN1-regulated autophagy protein 1 OS=Homo sapiens GN=AMBRA1 PE=1 SV=2	[R].lELSsSASPQEER.[T]	1.84266	S8(Phospho): 99.89	13.827	10.2391	11.809	60.3606	50.1377	70.6169	11.9584	60.3717	0.0125813	-2.33585	1.90027	AMBRA1
A0A0A0MRM9	Nucleolar and coiled-body phosphoprotein 1 (Fragment) OS=Homo sapiens GN=NOLC1 PE=1 SV=1	[K].ikLQtPNtFPk.[R]	-0.157632	T5(Phospho): 100; T8(Phospho): 100	7.77609	18.1775	12.9337	44.9308	101.034	29.1302	12.9624	58.3649	0.170693	-2.17076	0.767785	NOLC1
P06400	Retinoblastoma-associated protein OS=Homo sapiens GN=RB1 PE=1 SV=2	[R].kSNLDEEVNVIPPHtPVR.[T]	0.477794	T15(Phospho): 100	13.482	20.733	6.81075	76.4174	58.1014	47.8883	13.6753	60.8024	0.0161855	-2.15256	1.79087	RB1
P17096	High mobility group protein HMG-I/HMG-Y OS=Homo sapiens GN=HMGA1 PE=1 SV=3	[K].kLEkEEEEGIsQESSEEEQ.[-]	0.672725	S14(Phospho): 49.66; S15(Phospho): 49.66	24.1274	3.7578	12.8261	111.587	6.58092	60.5871	13.5704	59.585	0.266298	-2.13448	0.574633	HMGA1
O94916	Nuclear factor of activated T-cells 5 OS=Homo sapiens GN=NFAT5 PE=1 SV=1	[K].rHTVLYIsPPPEDLLDNSR.[M]	-0.821274	T3(Phospho): 86.34	5.218	9.42876	24.7027	16.8158	117.062	30.5794	13.1165	54.819	0.314103	-2.06329	0.502929	NFAT5
Q9UKJ3	G patch domain-containing protein 8 OS=Homo sapiens GN=GPATCH8 PE=1 SV=2	[K].aTGPPSQNSNIGtGRGSEGDcSPEDk.[N]	2.48845	S17(Phospho): 88.9	3.05436	5.51913	33.6853	10.3091	1.63912	159.187	14.0863	57.045	0.490885	-2.01781	0.30902	GPATCH8
P49450	Histone H3-like centromeric protein A OS=Homo sapiens GN=CENPA PE=1 SV=1	[R].rRsPsPTPTPGPSR.[R]	0.505099	S3(Phospho): 75.6; S13(Phospho): 74.07	18.381	20.1576	7.0739	155.385	1.95846	24.0417	15.2042	60.4618	0.444546	-1.99156	0.352083
A0A075B6F8	Microcephalin OS=Homo sapiens GN=MCPH1 PE=1 SV=1	[K].gHDDDLTPLEGsLEEMk.[E]	-0.300133	S12(Phospho): 100	10.1815	17.4991	16.4936	12.7538	120.792	36.3499	14.7248	56.6319	0.329419	-1.94337	0.482252
Q8NFQ8	Torsin-1A-interacting protein 2 OS=Homo sapiens GN=TOR1AIP2 PE=1 SV=1	[K].gHHLPSENLGkEPLDPDPsHSPSDk.[V]	0.386282	S19(Phospho): 49; S21(Phospho): 49	14.5012	13.8969	15.4158	30.1208	124.613	13.6176	14.6046	56.1171	0.352825	-1.94201	0.45244
Q6XZF7	Dynamin-binding protein OS=Homo sapiens GN=DNMBP PE=1 SV=1	[R].tNAVsPk.[L]	-0.0687149	S5(Phospho): 100	33.8311	0.837555	11.2068	172.108	0.213118	1.08018	15.2918	57.8005	0.536075	-1.91832	0.270775
P17096	High mobility group protein HMG-I/HMG-Y OS=Homo sapiens GN=HMGA1 PE=1 SV=3	[K].kLEkEEEEGIsQESSEEEQ.[-]	0.180691	S14(Phospho): 85.72	6.70779	17.3223	22.7811	44.3232	3.47389	128.992	15.6037	58.9296	0.361686	-1.9171	0.441668
Q6ZRI6	Uncharacterized protein C15orf39 OS=Homo sapiens GN=C15orf39 PE=1 SV=3	[R].kPTAEAsPVk.[A]	-0.784075	S7(Phospho): 100	37.9345	1.60573	8.11081	156.586	2.34608	17.0663	15.8837	58.6661	0.47804	-1.88498	0.320536
Q96NE9	FERM domain-containing protein 6 OS=Homo sapiens GN=FRMD6 PE=1 SV=1	[R].hSLsLDDIRLYQk.[D]	-0.857576	S4(Phospho): 98.79	21.8661	19.1497	6.18358	3.83633	159.307	9.17193	15.7332	57.4384	0.499482	-1.86821	0.30148
O00499	Myc box-dependent-interacting protein 1 OS=Homo sapiens GN=BIN1 PE=1 SV=1	[R].vNHEPEPAGGATPGATLPksPSQLRk.[G]	1.91272	S20(Phospho): 83.4	20.5015	11.706	13.954	27.0358	128.724	11.9475	15.3871	55.9024	0.384341	-1.86118	0.415283
Q03111	Protein ENL OS=Homo sapiens GN=MLLT1 PE=1 SV=2	[R].sPEScSkPEk.[I]	0.530295	S1(Phospho): 99.94	41.5858	5.02527	3.25842	166.227	0.381195	12.2443	16.6231	59.6175	0.508165	-1.84254	0.293995
P06400	Retinoblastoma-associated protein OS=Homo sapiens GN=RB1 PE=1 SV=2	[K].tLQTDSIDsFETQRTPRk.[S]	0.167696	T15(Phospho): 88.85	5.16581	27.8415	14.9624	8.8173	121.71	41.0499	15.9899	57.1925	0.344117	-1.83866	0.463294
Q99661	Kinesin-like protein KIF2C OS=Homo sapiens GN=KIF2C PE=1 SV=2	[R].mEGAEINksLLALk.[E]	-0.817601	S9(Phospho): 100	18.1386	21.2761	9.22886	45.1663	103.591	25.1351	16.2145	57.9642	0.215956	-1.83788	0.665634
O60832	H/ACA ribonucleoprotein complex subunit 4 OS=Homo sapiens GN=DKC1 PE=1 SV=3	[K].aGLESGAEPGDGDsDTTkk.[K]	-0.438399	S14(Phospho): 99.88	12.9707	12.7822	22.9382	65.5948	1.13849	106.936	16.2304	57.8897	0.308134	-1.83461	0.51126
P42575	Caspase-2 OS=Homo sapiens GN=CASP2 PE=1 SV=2	[K].nHAGsPGcEESDAGkEk.[L]	1.411	S5(Phospho): 100	29.0232	2.5819	16.9683	147.049	0.547857	22.5191	16.1911	56.7055	0.469168	-1.80828	0.328671
P06400	Retinoblastoma-associated protein OS=Homo sapiens GN=RB1 PE=1 SV=2	[K].dREGPTDHLESAcPLNLPLQNNHTAADMYLsPVR.[S]	-0.371346	S31(Phospho): 86.87	22.3563	11.4435	15.0626	32.767	89.8836	47.5935	16.2875	56.748	0.137422	-1.80081	0.861945
O76021	Ribosomal L1 domain-containing protein 1 OS=Homo sapiens GN=RSL1D1 PE=1 SV=3	[K].eksPSLGk.[K]	0.193948	S3(Phospho): 95.88	39.4868	2.34599	9.16178	141.046	0.123984	34.2027	16.9982	58.4576	0.434208	-1.78201	0.362302
Q7RTP6	Protein-methionine sulfoxide oxidase MICAL3 OS=Homo sapiens GN=MICAL3 PE=1 SV=2	[K].sPQDEGLHLLkPLSIPk.[R]	1.39041	S1(Phospho): 100	19.3384	15.4373	14.0803	37.2482	117.069	13.5829	16.2854	55.9667	0.332485	-1.78099	0.478228
Q6UN15	Pre-mRNA 3'-end-processing factor FIP1 OS=Homo sapiens GN=FIP1L1 PE=1 SV=1	[R].dHSPTPSVFNsDEERYR.[Y]	-0.97376	S3(Phospho): 88.9	5.64084	10.1928	31.1094	62.2368	67.893	29.3072	15.6477	53.1456	0.0691744	-1.764	1.16005
Q9Y3Z3	Deoxynucleoside triphosphate triphosphohydrolase SAMHD1 OS=Homo sapiens GN=SAMHD1 PE=1 SV=2	[R].nFTkPQDGDVIAPLItPQkk.[E]	-1.21709	T16(Phospho): 100	11.2146	23.8266	16.2963	51.8806	66.5424	53.7896	17.1125	57.4042	0.00283855	-1.74611	2.5469
E9PK25	Cofilin-1 OS=Homo sapiens GN=CFL1 PE=1 SV=1	[R].ksSTPEEVk.[K]	2.78897	S2(Phospho): 48.31; S3(Phospho): 48.31	49.6261	3.32102	0.308465	177.048	0.322631	1.08052	17.7519	59.4838	0.555978	-1.74452	0.254942
Q01518	Adenylyl cyclase-associated protein 1 OS=Homo sapiens GN=CAP1 PE=1 SV=5	[R].gYADsPSk.[AG]	0.741065	S5(Phospho): 100	46.9437	1.58761	4.08472	169.779	0.110413	6.25728	17.5387	58.7154	0.54003	-1.7432	0.267582
Q16763	Ubiquitin-conjugating enzyme E2 S OS=Homo sapiens GN=UBE2S PE=1 SV=2	[K].dFPAsPPkGYFLTk.[I]	-0.410622	S5(Phospho): 99.89	23.8347	14.7594	13.2953	57.9154	72.5202	40.7996	17.2965	57.0784	0.0370053	-1.72247	1.43174
O76021	Ribosomal L1 domain-containing protein 1 OS=Homo sapiens GN=RSL1D1 PE=1 SV=3	[K].eksPSLGk.[K]	-0.1928	S3(Phospho): 99.99	42.0123	0.9545	9.94202	143.495	0.0566086	29.9625	17.6363	57.838	0.458158	-1.71347	0.338984
Q9NYF3	Protein FAM53C OS=Homo sapiens GN=FAM53C PE=1 SV=1	[R].lRPsLDFDk.[M]	0.443977	S4(Phospho): 100	15.9071	11.1423	22.9703	11.9929	125.666	23.0586	16.6732	53.5725	0.415266	-1.68396	0.381674
P24534	Elongation factor 1-beta OS=Homo sapiens GN=EEF1B2 PE=1 SV=3	[K].yGPADVEDTTGSGATDSkDDDDIDLFGsDDEEESEEAkR.[L]	-0.0930686	S28(Phospho): 99.4	7.27389	47.7985	2.66651	123.478	38.7667	20.1921	19.2463	60.8123	0.324988	-1.65978	0.488132
P42575	Caspase-2 OS=Homo sapiens GN=CASP2 PE=1 SV=2	[K].nHAGsPGcEESDAGkEk.[L]	1.99296	S5(Phospho): 99.94	32.2278	3.06058	18.4812	137.422	0.649428	29.4722	17.9232	55.8479	0.45991	-1.63968	0.337327
Q8N3D4	EH domain-binding protein 1-like protein 1 OS=Homo sapiens GN=EHBP1L1 PE=1 SV=2	[R].aSsPEkAEEDR.[R]	-1.86372	S3(Phospho): 99.62	43.6788	2.99722	9.05052	151.988	0.271533	20.4245	18.5755	57.5615	0.502359	-1.6317	0.298986
Q96RT1	Protein LAP2 OS=Homo sapiens GN=ERBB2IP PE=1 SV=2	[K].sHSITNMEIGGLk.[I]	-0.111772	S1(Phospho): 48.65; S3(Phospho): 48.65	9.09121	16.9843	25.3622	11.1765	127.179	20.9544	17.1459	53.1033	0.435504	-1.63094	0.361008
O15355	Protein phosphatase 1G OS=Homo sapiens GN=PPM1G PE=1 SV=1	[R].kLEEVLsTEGAEENGNSDkk.[K]	1.11641	T8(Phospho): 89.99	19.3599	20.234	16.4403	81.9668	19.9694	71.1803	18.6781	57.7055	0.177626	-1.62736	0.750494
Q96JP5	E3 ubiquitin-protein ligase ZFP91 OS=Homo sapiens GN=ZFP91 PE=1 SV=1	[K].sPsPVQGk.[K]	1.11856	S3(Phospho): 100	53.4061	1.35613	2.43511	171.542	0.191225	3.47476	19.0658	58.4026	0.564881	-1.61505	0.248043
Q5JSZ5	Protein PRRC2B OS=Homo sapiens GN=PRRC2B PE=1 SV=2	[K].lkFsDDEEEEEVVkDGRPk.[W]	-0.375719	S4(Phospho): 100	24.0652	23.2288	9.84332	115.721	26.2978	32.7586	19.0458	58.259	0.305365	-1.61301	0.515181
P43487	Ran-specific GTPase-activating protein OS=Homo sapiens GN=RANBP1 PE=1 SV=1	[K].dTHEDHDTsTENTDEsNHDPQFEPIVSLPEQEIk.[T]	-1.12338	T10(Phospho): 59.34; T13(Phospho): 49.98; S16(Phospho): 49.98	6.80121	12.2896	32.2551	42.5202	86.056	27.6492	17.1153	52.0751	0.173755	-1.60531	0.760063
P27816	Microtubule-associated protein 4 OS=Homo sapiens GN=MAP4 PE=1 SV=3	[K].dMsPLSETEmALGk.[D]	-1.74098	S6(Phospho): 48.21; T8(Phospho): 48.21	7.70052	9.29958	34.3307	14.3576	86.6144	55.1912	17.1103	52.0544	0.231384	-1.60516	0.635666
E7EVA0	Microtubule-associated protein OS=Homo sapiens GN=MAP4 PE=1 SV=1	[K].dMsPLSETEmALGk.[D]	-1.74098	S6(Phospho): 48.21; T8(Phospho): 48.21	7.70052	9.29958	34.3307	14.3576	86.6144	55.1912	17.1103	52.0544	0.231384	-1.60516	0.635666
Q13310	Polyadenylate-binding protein 4 OS=Homo sapiens GN=PABPC4 PE=1 SV=1	[K].eFsPFGSITSAk.[V]	-2.31184	S3(Phospho): 100	11.2311	12.4127	28.4777	9.69035	107.215	41.5876	17.3738	52.8308	0.34169	-1.60446	0.466368
Q9H9J4	Ubiquitin carboxyl-terminal hydrolase 42 OS=Homo sapiens GN=USP42 PE=1 SV=3	[R].rHDsVENSDSHVEkk.[A]	-0.738978	S4(Phospho): 82.67	46.8881	2.17742	7.67104	161.65	0.391115	10.3313	18.9122	57.4576	0.541387	-1.60318	0.266492
Q9NYF8	Bcl-2-associated transcription factor 1 OS=Homo sapiens GN=BCLAF1 PE=1 SV=2	[K].dLFDYsPPLHk.[N]	1.57271	S6(Phospho): 91.88	8.30095	7.34871	34.9257	8.36148	105.847	39.4274	16.8585	51.2121	0.355586	-1.60301	0.449055
Q09666	Neuroblast differentiation-associated protein AHNAK OS=Homo sapiens GN=AHNAK PE=1 SV=2	[K].isMPDLDLHLk.[S]	0.71185	S2(Phospho): 100	14.5284	23.6145	15.9264	5.99779	147.949	10.2727	18.0231	54.7398	0.513628	-1.60274	0.289352
Q99661	Kinesin-like protein KIF2C OS=Homo sapiens GN=KIF2C PE=1 SV=2	[KR].sLLALk.[TEL]	-0.797948	S1(Phospho): 100	5.10916	16.2682	31.6449	11.1072	82.7698	65.6542	17.6741	53.1771	0.236895	-1.58917	0.625445
O00139	Kinesin-like protein KIF2A OS=Homo sapiens GN=KIF2A PE=1 SV=3	[KR].sLLALk.[TEL]	-0.797948	S1(Phospho): 100	5.10916	16.2682	31.6449	11.1072	82.7698	65.6542	17.6741	53.1771	0.236895	-1.58917	0.625445
Q8IWI9	MAX gene-associated protein OS=Homo sapiens GN=MGA PE=1 SV=3	[K].sILPYPVsPk.[Q]	-0.557625	S8(Phospho): 100	21.8286	8.93914	22.7994	28.1122	106.352	25.6945	17.8557	53.3861	0.310935	-1.58008	0.507331
P17096	High mobility group protein HMG-I/HMG-Y OS=Homo sapiens GN=HMGA1 PE=1 SV=3	[K].kLEkEEEEGISQEssEEEQ.[-]	0.881119	S14(Phospho): 99.98; S15(Phospho): 100	24.6008	21.5626	12.9344	91.0311	0.434731	85.0424	19.6993	58.8361	0.31222	-1.57856	0.505539
Q8WVC0	RNA polymerase-associated protein LEO1 OS=Homo sapiens GN=LEO1 PE=1 SV=1	[K].kLTsDEEGEPSGkR.[K]	1.52197	S4(Phospho): 92.38	42.3107	6.35267	9.16378	148.582	0.173801	23.8544	19.2757	57.5366	0.496469	-1.5777	0.304107
Q8WUA2	Peptidyl-prolyl cis-trans isomerase-like 4 OS=Homo sapiens GN=PPIL4 PE=1 SV=1	[K].tHHcsEEkEDEDYMPIk.[N]	0.37889	S5(Phospho): 90.21	16.0855	10.4121	27.6591	40.8623	61.5384	58.9781	18.0522	53.7929	0.0139909	-1.57524	1.85416
Q15361	Transcription termination factor 1 OS=Homo sapiens GN=TTF1 PE=1 SV=3	[K].dFQHLIsSPLkk.[S]	1.68844	S7(Phospho): 50; S8(Phospho): 50	14.0509	14.6755	25.3566	27.6728	95.6552	37.2192	18.0277	53.5157	0.234574	-1.56975	0.62972
Q5VUA4	Zinc finger protein 318 OS=Homo sapiens GN=ZNF318 PE=1 SV=2	[R].tksPkPAESPQSATk.[Q]	-1.13829	S9(Phospho): 82.21	31.9968	10.7623	14.6652	132.658	2.58989	35.1673	19.1414	56.8052	0.437515	-1.56933	0.359007
Q9NYF8	Bcl-2-associated transcription factor 1 OS=Homo sapiens GN=BCLAF1 PE=1 SV=2	[K].kETQsPEQVkSEk.[L]	0.057498	S5(Phospho): 99.06	45.7492	6.0059	6.76624	153.947	0.150856	19.5345	19.5071	57.8774	0.514821	-1.569	0.288343
Q09666	Neuroblast differentiation-associated protein AHNAK OS=Homo sapiens GN=AHNAK PE=1 SV=2	[K].aPkIsMPDFDLHLk.[G]	-0.320357	S5(Phospho): 100	6.6294	35.6757	14.0394	3.79782	147.85	15.5098	18.7815	55.7193	0.509501	-1.56887	0.292855
Q12834	Cell division cycle protein 20 homolog OS=Homo sapiens GN=CDC20 PE=1 SV=2	[K].eNQPENSQtPTkk.[E]	0.319139	T9(Phospho): 49.45; T11(Phospho): 49.45	46.0851	5.07736	7.30676	148.657	0.477665	24.2951	19.4897	57.8099	0.496479	-1.5686	0.3041
Q3BDU5	Prelamin-A/C OS=Homo sapiens GN=LMNA PE=1 SV=1	[R].aSsHsSQTQGGGSVTk.[K]	-4.88483	S2(Phospho): 90.14; S3(Phospho): 76.17	46.5944	8.34303	4.50547	154.338	0.667971	20.2742	19.8143	58.4267	0.512144	-1.56009	0.290608
P02545	Prelamin-A/C OS=Homo sapiens GN=LMNA PE=1 SV=1	[R].aSsHsSQTQGGGSVTk.[K]	-4.88483	S2(Phospho): 90.14; S3(Phospho): 76.17	46.5944	8.34303	4.50547	154.338	0.667971	20.2742	19.8143	58.4267	0.512144	-1.56009	0.290608
O76024	Wolframin OS=Homo sapiens GN=WFS1 PE=1 SV=2	[R].lVsSESk.[N]	0.899361	S3(Phospho): 93.75	50.9642	0.987272	6.92166	162.836	0.20949	8.66599	19.6244	57.2373	0.556258	-1.54431	0.254724
Q9NS91	E3 ubiquitin-protein ligase RAD18 OS=Homo sapiens GN=RAD18 PE=1 SV=2	[R].nHLLQFALEsPAkSPASSSSk.[N]	-2.28635	S10(Phospho): 98.77	33.6576	12.4847	12.043	105.804	43.6976	19.6011	19.3951	56.3675	0.284167	-1.53917	0.546426
P25686	DnaJ homolog subfamily B member 2 OS=Homo sapiens GN=DNAJB2 PE=1 SV=3	[R].gEATkRsPsPEEk.[A]	0.0974752	T4(Phospho): 89.42; S9(Phospho): 99.77	48.6683	2.08657	8.11458	162.492	0.693177	7.81156	19.6232	56.999	0.557161	-1.53838	0.254019
P42166	Lamina-associated polypeptide 2, isoform alpha OS=Homo sapiens GN=TMPO PE=1 SV=2	[K].lAsERNLFISck.[S]	-1.52091	S3(Phospho): 100	19.6557	25.7067	11.8636	11.938	146.881	7.16574	19.0753	55.3282	0.511903	-1.53631	0.290812
Q96RT1	Protein LAP2 OS=Homo sapiens GN=ERBB2IP PE=1 SV=2	[K].sHsITNmEIGGLk.[I]	1.34547	S3(Phospho): 91.61	17.311	19.2888	19.4625	18.814	126.182	16.7209	18.6874	53.9057	0.432633	-1.52837	0.363881
Q9UIG0	Tyrosine-protein kinase BAZ1B OS=Homo sapiens GN=BAZ1B PE=1 SV=2	[R].rQsLELQkcEEILHk.[I]	0.181149	S3(Phospho): 100	6.15538	17.8061	30.1085	7.56848	136.467	9.81524	18.0233	51.2837	0.517943	-1.50863	0.285718
G3V1S3	DENN domain-containing protein 5B OS=Homo sapiens GN=DENND5B PE=1 SV=1	[R].rLsITSLTGk.[N]	-1.81345	S3(Phospho): 99.44	24.0997	8.84336	23.2996	32.0796	93.2472	34.6738	18.7475	53.3335	0.221039	-1.50834	0.655531
Q14315	Filamin-C OS=Homo sapiens GN=FLNC PE=1 SV=3	[R].mTsPSRRPIPckLEPGGGAEAQAVR.[Y]	-0.768811	S5(Phospho): 72.15	23.8473	7.54998	24.3316	33.969	98.6385	25.7532	18.5763	52.7869	0.273505	-1.50672	0.563035
Q13428	Treacle protein OS=Homo sapiens GN=TCOF1 PE=1 SV=3	[R].akkPEEESESSEEGSEsEEEAPAGTR.[S]	-0.395599	S17(Phospho): 99.95	2.66319	6.19067	46.3134	6.3097	0.135968	150.28	18.3891	52.2418	0.566716	-1.50636	0.246635
E7ETY2	Treacle protein OS=Homo sapiens GN=TCOF1 PE=1 SV=1	[R].akkPEEESESSEEGSEsEEEAPAGTR.[S]	-0.395599	S17(Phospho): 99.95	2.66319	6.19067	46.3134	6.3097	0.135968	150.28	18.3891	52.2418	0.566716	-1.50636	0.246635
Q16555	Dihydropyrimidinase-related protein 2 OS=Homo sapiens GN=DPYSL2 PE=1 SV=1	[R].gLYDGPVcEVSVtPk.[T]	2.26414	T13(Phospho): 97.32	14.9213	8.19358	31.6886	21.9823	89.1904	44.3389	18.2678	51.8372	0.225525	-1.50468	0.646805
Q9H2Y7	Zinc finger protein 106 OS=Homo sapiens GN=ZNF106 PE=1 SV=1	[R].rHsAQLSSDHIIPLMHLAk.[D]	-0.804515	S3(Phospho): 96.36	16.7263	12.3925	26.574	29.1065	104.784	23.319	18.5643	52.403	0.32558	-1.49712	0.487342
Q9BWT3	Poly(A) polymerase gamma OS=Homo sapiens GN=PAPOLG PE=1 SV=2	[K].hYGITsPISLASPk.[E]	0.0376345	T5(Phospho): 47.12; S6(Phospho): 47.12	24.4924	6.16247	25.4128	25.0544	101.153	31.2794	18.6892	52.4958	0.298307	-1.49	0.525337
P46013	Antigen KI-67 OS=Homo sapiens GN=MKI67 PE=1 SV=2	[R].kADtEEEFLAFRk.[Q]	0.24707	T4(Phospho): 100	33.4508	18.8494	7.77946	50.4777	108.3	9.76726	20.0266	56.1816	0.332757	-1.48818	0.477873
P48651	Phosphatidylserine synthase 1 OS=Homo sapiens GN=PTDSS1 PE=1 SV=1	[K].gsEDSPPkHAGNNESHSSR.[R]	3.66334	S2(Phospho): 98.53	47.6942	3.28824	9.86087	145.494	0.697735	24.1641	20.2811	56.7854	0.506811	-1.48538	0.295154
Q9BY89	Uncharacterized protein KIAA1671 OS=Homo sapiens GN=KIAA1671 PE=1 SV=2	[R].kEEsDEEETASk.[A]	0.122359	S4(Phospho): 100	47.234	2.85381	10.8059	133.478	1.66	35.192	20.2979	56.7765	0.459754	-1.48396	0.337475
Q86YV5	Tyrosine-protein kinase SgK223 OS=Homo sapiens GN=SGK223 PE=1 SV=4	[K].sAsFAFEFPk.[D]	0.0226379	S3(Phospho): 100	5.79411	27.4334	23.8508	4.42255	137.941	16.776	19.0261	53.0465	0.509409	-1.47928	0.292933
Q5JRA6	Melanoma inhibitory activity protein 3 OS=Homo sapiens GN=MIA3 PE=1 SV=1	[R].sEFGSVDGPLPHPR.[W]	-0.441578	S5(Phospho): 100	36.6257	9.78826	12.3973	24.3171	124.177	15.3233	19.6038	54.6058	0.422988	-1.47793	0.373672
Q13200	26S proteasome non-ATPase regulatory subunit 2 OS=Homo sapiens GN=PSMD2 PE=1 SV=3	[R].dkAPVQPQQsPAAAPGGTDEkPSGk.[E]	-0.414137	S10(Phospho): 99.94	30.9169	4.3827	23.6352	103.875	2.75932	57.3422	19.6449	54.659	0.35372	-1.4763	0.451341
P53621	Coatomer subunit alpha OS=Homo sapiens GN=COPA PE=1 SV=2	[R].aSNLENSTYDLYTIPkDADsQNPDAPEGkR.[S]	-1.82112	Y12(Phospho): 32.67; T13(Phospho): 32.67; S20(Phospho): 32.67	20.1422	12.5507	24.7864	28.2711	98.0499	32.4163	19.1598	52.9125	0.272491	-1.46553	0.564648
Q5T7N3	KN motif and ankyrin repeat domain-containing protein 4 OS=Homo sapiens GN=KANK4 PE=2 SV=1	[-].mEkTDAkDQSsQGDEEk.[D]	5.76562	T4(Phospho): 77.73	5.79977	10.1483	41.7763	11.3726	0.0347651	148	19.2415	53.1357	0.553284	-1.46546	0.257052
P48681	Nestin OS=Homo sapiens GN=NES PE=1 SV=2	[R].sLEEDLETLksLEk.[E]	1.13844	S11(Phospho): 100	3.69374	29.6177	24.887	7.14471	124.464	28.2285	19.3995	53.2792	0.448819	-1.45755	0.347928
Q8WYP5	Protein ELYS OS=Homo sapiens GN=AHCTF1 PE=1 SV=3	[K].eTRIsFVEEDVHPk.[W]	2.52176	S5(Phospho): 94.46	1.79151	33.8734	22.7976	6.34384	139.053	14.8874	19.4875	53.428	0.514122	-1.45505	0.288934
Q96JM3	Chromosome alignment-maintaining phosphoprotein 1 OS=Homo sapiens GN=CHAMP1 PE=1 SV=2	[K].cDILVQEELLAsPkk.[L]	1.04714	S12(Phospho): 100	3.35633	25.4721	29.5854	1.35086	92.6508	65.9777	19.4713	53.3264	0.337976	-1.4535	0.471114
O43852	Calumenin OS=Homo sapiens GN=CALU PE=1 SV=2	[K].vHNDAQsFDYDHDAFLGAEEAk.[T]	-2.79798	S7(Phospho): 98.26	12.8265	24.7393	21.2403	17.9912	121.857	21.0263	19.602	53.6248	0.424001	-1.4519	0.372633
Q8IWI9	MAX gene-associated protein OS=Homo sapiens GN=MGA PE=1 SV=3	[K].gLPFYAGLsPAGk.[L]	-0.197134	S9(Phospho): 100	10.5553	19.4608	28.0253	25.1444	92.4073	40.8217	19.3471	52.7912	0.23768	-1.44818	0.624007
O60499	Syntaxin-10 OS=Homo sapiens GN=STX10 PE=1 SV=1	[K].dHMVsPTAVAFLER.[N]	0.0807611	S5(Phospho): 100	17.0853	7.74929	31.843	45.8602	74.3475	34.3998	18.8925	51.5359	0.0922623	-1.44776	1.03498
O43852	Calumenin OS=Homo sapiens GN=CALU PE=1 SV=2	[K].vHNDAQsFDYDHDAFLGAEEAk.[T]	1.64771	S7(Phospho): 98.2	8.00792	14.4701	33.5391	15.6147	109.219	27.8756	18.6724	50.9029	0.388056	-1.44684	0.411105
Q96RT1	Protein LAP2 OS=Homo sapiens GN=ERBB2IP PE=1 SV=2	[R].tYsIDGPNASRPQSARPSINEIPER.[T]	-0.165148	S3(Phospho): 82.49	12.8046	28.7577	18.3672	36.4759	111.515	15.2598	19.9765	54.4168	0.359264	-1.44575	0.444586
Q02539	Histone H1.1 OS=Homo sapiens GN=HIST1H1A PE=1 SV=3	[KR].gTGAsGSFk.[L]	0.210558	S5(Phospho): 50; S7(Phospho): 50	48.7868	2.16807	11.0356	150.456	0.180909	17.8176	20.6635	56.1516	0.537984	-1.44224	0.269231
P16403	Histone H1.2 OS=Homo sapiens GN=HIST1H1C PE=1 SV=2	[KR].gTGAsGSFk.[L]	0.210558	S5(Phospho): 50; S7(Phospho): 50	48.7868	2.16807	11.0356	150.456	0.180909	17.8176	20.6635	56.1516	0.537984	-1.44224	0.269231
P10412	Histone H1.4 OS=Homo sapiens GN=HIST1H1E PE=1 SV=2	[KR].gTGAsGSFk.[L]	0.210558	S5(Phospho): 50; S7(Phospho): 50	48.7868	2.16807	11.0356	150.456	0.180909	17.8176	20.6635	56.1516	0.537984	-1.44224	0.269231
Q9H8U3	AN1-type zinc finger protein 3 OS=Homo sapiens GN=ZFAND3 PE=1 SV=1	[R].scGTDSQSENEAsPVkRPR.[L]	0.202377	S13(Phospho): 99.89	52.1549	0.402101	9.61644	152.875	0.462236	15.5391	20.7245	56.292	0.546656	-1.4416	0.262286
A0A0A0MRM9	Nucleolar and coiled-body phosphoprotein 1 (Fragment) OS=Homo sapiens GN=NOLC1 PE=1 SV=1	[K].lQtPNtFPk.[R]	1.36253	T3(Phospho): 100; T6(Phospho): 100	19.3956	12.2291	27.6863	89.7384	23.3637	47.6062	19.7703	53.5695	0.21944	-1.43807	0.658685
O43491	Band 4.1-like protein 2 OS=Homo sapiens GN=EPB41L2 PE=1 SV=1	[R].eVRsPTkAPHLQLIEGk.[KSI]	-0.214599	S4(Phospho): 82.8	45.6095	7.95152	9.19983	147.439	12.0185	9.85351	20.9203	56.4371	0.521016	-1.43174	0.283149
Q9NY27	Serine/threonine-protein phosphatase 4 regulatory subunit 2 OS=Homo sapiens GN=PPP4R2 PE=1 SV=3	[K].eANLQQNEEkNHSDSSTSESEVSSVsPLk.[N]	-0.496389	S26(Phospho): 97.99	31.2719	12.644	17.4122	132.345	18.8642	13.7454	20.4427	54.9847	0.467063	-1.42744	0.330625
Q9UBG0	C-type mannose receptor 2 OS=Homo sapiens GN=MRC2 PE=1 SV=2	[R].sSSsPTEATEk.[N]	0.79679	T6(Phospho): 99.13	57.6531	1.82405	4.59436	151.711	0.387048	20.0866	21.3572	57.3948	0.537314	-1.4262	0.269772
A0A087X1R1	Smoothelin OS=Homo sapiens GN=SMTN PE=1 SV=1	[R].vNkAPEGRSPLsAEELmTIEDEGVLDk.[M]	4.00308	S12(Phospho): 86.85	13.0335	35.0591	13.9866	25.2255	119.699	21.6861	20.6931	55.5367	0.391748	-1.42429	0.406993
Q9HB96	Fanconi anemia group E protein OS=Homo sapiens GN=FANCE PE=1 SV=1	[R].rkDSEEEAAsPEGk.[R]	1.97097	S10(Phospho): 99.92	56.18	2.80129	5.08209	156.047	0.594409	15.0146	21.3545	57.2188	0.553104	-1.42195	0.257193
E7EX17	Eukaryotic translation initiation factor 4B OS=Homo sapiens GN=EIF4B PE=1 SV=1	[R].sQSsDTEQQsPTSGGGk.[V]	5.22678	S4(Phospho): 92.03; S10(Phospho): 99.99	49.2172	9.58244	5.63474	162.774	2.03331	6.89024	21.4781	57.2326	0.572511	-1.41397	0.242216
P35251	Replication factor C subunit 1 OS=Homo sapiens GN=RFC1 PE=1 SV=4	[K].sLDFkEQVAEETSGDSk.[A]	-0.455283	S1(Phospho): 100	27.2991	31.1868	5.66201	60.5456	103.049	7.07401	21.3826	56.8896	0.328714	-1.41173	0.483181
P17706	Tyrosine-protein phosphatase non-receptor type 2 OS=Homo sapiens GN=PTPN2 PE=1 SV=2	[R].wkELSkEDLSPAFDHsPNk.[I]	0.957067	S16(Phospho): 99.9	33.6822	14.2191	13.9759	53.3321	91.1847	19.7146	20.6257	54.7438	0.235183	-1.40825	0.628594
P17096	High mobility group protein HMG-I/HMG-Y OS=Homo sapiens GN=HMGA1 PE=1 SV=3	[K].kLEkEEEEGISQEssEEEQ.[-]	2.09256	S14(Phospho): 99.25; S15(Phospho): 99.93	21.5494	28.3102	15.4583	93.4862	0.1937	79.3966	21.7726	57.6922	0.341256	-1.40586	0.46692
P11940	Polyadenylate-binding protein 1 OS=Homo sapiens GN=PABPC1 PE=1 SV=2	[K].eFsPFGTITSAk.[VK]	-0.901578	S3(Phospho): 100	9.54083	17.9594	31.0194	10.6626	106.107	38.193	19.5065	51.6542	0.374858	-1.40493	0.426133
Q9HB96	Fanconi anemia group E protein OS=Homo sapiens GN=FANCE PE=1 SV=1	[R].rkDSEEEAAsPEGk.[R]	4.04654	S10(Phospho): 99.74	55.0959	2.40425	6.8589	153.289	0.51016	16.5433	21.453	56.7808	0.550109	-1.40422	0.259551
Q13185	Chromobox protein homolog 3 OS=Homo sapiens GN=CBX3 PE=1 SV=4	[K].rksLsDSESDDSk.[S]	1.10134	S3(Phospho): 100; S5(Phospho): 99.73	49.6691	4.77674	9.89698	139.943	0.124259	29.5292	21.4476	56.5322	0.502965	-1.39826	0.298462
P22234	Multifunctional protein ADE2 OS=Homo sapiens GN=PAICS PE=1 SV=3	[R].dLkEVtPEGLQMVk.[K]	1.059	T6(Phospho): 100	29.341	18.7523	15.0632	60.1426	73.1496	32.2638	21.0522	55.1853	0.0922803	-1.39031	1.03489
Q03188	Centromere protein C OS=Homo sapiens GN=CENPC PE=1 SV=2	[R].sWITIPR.[K]	0.0802595	S1(Phospho): 99.32	23.6653	30.0201	10.1673	41.3097	114.477	11.3942	21.2842	55.727	0.377599	-1.38859	0.422969
O75717	WD repeat and HMG-box DNA-binding protein 1 OS=Homo sapiens GN=WDHD1 PE=1 SV=1	[R].sHILEDDENsVDISMLk.[T]	0.458332	S10(Phospho): 99.8	24.6684	8.88578	25.9002	40.2664	99.0044	16.0369	19.8181	51.7692	0.32308	-1.38527	0.49069
Q6PCE3	Glucose 1,6-bisphosphate synthase OS=Homo sapiens GN=PGM2L1 PE=1 SV=3	[K].aVAGVmITAsHNR.[K]	-0.613372	S10(Phospho): 99.99	30.0084	10.9691	21.6635	56.2795	44.6792	62.3507	20.8803	54.4365	0.0114688	-1.38243	1.94048
Q13185	Chromobox protein homolog 3 OS=Homo sapiens GN=CBX3 PE=1 SV=4	[K].rksLsDSESDDSk.[S]	0.989403	S3(Phospho): 99.94; S5(Phospho): 92.6	47.4931	4.26716	12.7233	128.809	1.67957	37.4766	21.4945	55.9885	0.464653	-1.38116	0.332871
Q9H410	Kinetochore-associated protein DSN1 homolog OS=Homo sapiens GN=DSN1 PE=1 SV=2	[K].tHDHQLESSLsPVEVFAk.[T]	0.750721	S11(Phospho): 100	28.6449	6.99555	24.575	49.3956	84.4966	22.8953	20.0718	52.2625	0.205497	-1.38061	0.687195
Q13185	Chromobox protein homolog 3 OS=Homo sapiens GN=CBX3 PE=1 SV=4	[R].ksLsDSESDDSkSk.[K]	0.843887	S2(Phospho): 100; S4(Phospho): 99.86	61.1396	4.60028	0.762419	170.923	0.208321	1.97112	22.1674	57.7008	0.602818	-1.38015	0.219814
P46013	Antigen KI-67 OS=Homo sapiens GN=MKI67 PE=1 SV=2	[K].tPVQYSQQQNsPQkHk.[N]	-0.42582	S11(Phospho): 100	56.2885	4.57547	4.873	161.858	0.175919	9.01132	21.9123	57.015	0.579861	-1.3796	0.236676
Q09666	Neuroblast differentiation-associated protein AHNAK OS=Homo sapiens GN=AHNAK PE=1 SV=2	[R].isMSEVDLNVAAPk.[V]	0.504466	S4(Phospho): 95.22	21.7309	32.8515	9.33796	2.68644	155.198	8.0984	21.3068	55.3277	0.567205	-1.37669	0.24626
Q9BTA9	WW domain-containing adapter protein with coiled-coil OS=Homo sapiens GN=WAC PE=1 SV=3	[R].rSDSPENkYsDSTGHSk.[A]	2.0402	Y9(Phospho): 43.81; S10(Phospho): 43.81	45.3985	5.61893	13.6172	133.711	0.271664	33.3202	21.5449	55.7677	0.488394	-1.37208	0.311229
Q6VMQ6	Activating transcription factor 7-interacting protein 1 OS=Homo sapiens GN=ATF7IP PE=1 SV=3	[R].sksEDmDNVQSk.[R]	-0.00572145	S3(Phospho): 99.53	42.9605	5.80816	15.5124	132.4	0.390833	33.3682	21.427	55.3863	0.486091	-1.3701	0.313282
Q13310	Polyadenylate-binding protein 4 OS=Homo sapiens GN=PABPC4 PE=1 SV=1	[K].vGAVAAATs.[-]	0.518909	S9(Phospho): 99.99	31.8237	5.76358	24.9704	109.807	1.22298	50.3949	20.8525	53.8085	0.405265	-1.36761	0.392261
Q7Z4V5	Hepatoma-derived growth factor-related protein 2 OS=Homo sapiens GN=HDGFRP2 PE=1 SV=1	[K].fALkVDsPDVk.[R]	-0.705403	S7(Phospho): 100	11.9577	30.811	19.6921	15.3651	129.071	16.4542	20.8203	53.6302	0.4769	-1.36506	0.321573
P49802	Regulator of G-protein signaling 7 OS=Homo sapiens GN=RGS7 PE=1 SV=3	[R].sHSPTHTPTPETkPPTEDELQQQIk.[Y]	-0.737813	S1(Phospho): 92.31	15.322	23.224	24.3309	36.2401	73.1943	51.9797	20.9589	53.8047	0.083222	-1.36017	1.07976
P22234	Multifunctional protein ADE2 OS=Homo sapiens GN=PAICS PE=1 SV=3	[K].tkEVYELLDsPGkVLLQSk.[D]	-0.0236684	S10(Phospho): 100	44.89	5.11526	13.5015	83.1024	66.9401	12.9556	21.1689	54.3327	0.262817	-1.35987	0.580347
Q96E09	Protein FAM122A OS=Homo sapiens GN=FAM122A PE=1 SV=1	[R].sNSAPLIHGLSDTSPVFQAEAPSAR.[R]	1.60494	S3(Phospho): 99.5	31.7153	12.0534	18.6553	24.2737	111.155	24.2668	20.808	53.232	0.379504	-1.35516	0.420783
Q15643	Thyroid receptor-interacting protein 11 OS=Homo sapiens GN=TRIP11 PE=1 SV=3	[R].dIsLDSELHDLR.[L]	-0.789523	S3(Phospho): 100	19.4264	16.5488	25.8007	36.1962	86.9874	34.537	20.592	52.5735	0.20184	-1.35225	0.694993
Q9UQ35	Serine/arginine repetitive matrix protein 2 OS=Homo sapiens GN=SRRM2 PE=1 SV=2	[R].eIssSPTSk.[N]	-0.428095	S3(Phospho): 99.4; S4(Phospho): 93.14	52.76	7.56314	6.47059	158.021	0.183674	12.0547	22.2646	56.7532	0.572887	-1.34995	0.241931
Q9HC52	Chromobox protein homolog 8 OS=Homo sapiens GN=CBX8 PE=1 SV=3	[R].vDDkPsSPGDSSkk.[R]	-0.686427	S7(Phospho): 93.45	45.1063	9.96005	11.0894	146.228	0.194951	22.013	22.0519	56.1454	0.535404	-1.34826	0.271318
P17096	High mobility group protein HMG-I/HMG-Y OS=Homo sapiens GN=HMGA1 PE=1 SV=3	[K].kLEkEEEEGIsQEsSEEEQ.[-]	-2.77535	S11(Phospho): 94.98; S14(Phospho): 52.51; S15(Phospho): 52.51	12.2307	34.3358	21.3077	32.5205	5.61343	134.545	22.6247	57.5596	0.468477	-1.34716	0.329312
Q16763	Ubiquitin-conjugating enzyme E2 S OS=Homo sapiens GN=UBE2S PE=1 SV=2	[K].dFPAsPPkGYFLTk.[I]	-0.619712	S5(Phospho): 100	22.7596	15.1702	24.4388	43.8589	86.2566	27.6145	20.7895	52.5767	0.20815	-1.33857	0.681623
Q9H307	Pinin OS=Homo sapiens GN=PNN PE=1 SV=4	[K].sLSPGkENVSALDMEk.[E]	-0.271909	S3(Phospho): 99.98	7.23062	17.9072	34.8164	8.64828	110.764	31.6288	19.9847	50.3471	0.431943	-1.33301	0.364573
Q16763	Ubiquitin-conjugating enzyme E2 S OS=Homo sapiens GN=UBE2S PE=1 SV=2	[K].dFPAsPPkGYFLTk.[I]	2.39171	S5(Phospho): 99.86	28.3056	14.2416	20.9721	44.4483	83.4391	32.078	21.1731	53.3218	0.166658	-1.33249	0.778175
P41252	Isoleucine--tRNA ligase, cytoplasmic OS=Homo sapiens GN=IARS PE=1 SV=2	[K].aPLkPYPVSPsDkVLIQEk.[T]	1.22518	S9(Phospho): 99.12	32.3687	10.4194	21.4058	79.3248	39.7028	42.5925	21.398	53.8733	0.108971	-1.3321	0.962688
O95747	Serine/threonine-protein kinase OSR1 OS=Homo sapiens GN=OXSR1 PE=1 SV=1	[R].lHkTEDGGWEWsDDEFDEESEEGkAAISQLR.[S]	4.33579	S12(Phospho): 100	39.245	10.1968	15.8756	130.487	20.5884	12.746	21.7725	54.607	0.481156	-1.32658	0.317714
Q09666	Neuroblast differentiation-associated protein AHNAK OS=Homo sapiens GN=AHNAK PE=1 SV=2	[K].isMPDFDLHLk.[G]	0.564172	S2(Phospho): 100	11.2667	33.8185	19.0461	2.81152	143.67	13.8149	21.3771	53.4322	0.553153	-1.32164	0.257155
Q14739	Lamin-B receptor OS=Homo sapiens GN=LBR PE=1 SV=2	[R].sASASHQADIk.[E]	1.06715	S1(Phospho): 33.33; S3(Phospho): 33.33; S5(Phospho): 33.33	53.9829	5.02602	8.53209	154.09	0.223682	13.8826	22.5137	56.0653	0.572422	-1.31631	0.242284
A0A087X1R1	Smoothelin OS=Homo sapiens GN=SMTN PE=1 SV=1	[R].vNkAPEGRSPLsAEELmTIEDEGVLDk.[M]	0.298782	S12(Phospho): 74.24	13.0705	43.6945	11.2009	26.8683	113.763	27.8263	22.6553	56.1526	0.367907	-1.3095	0.434262
Q14669	E3 ubiquitin-protein ligase TRIP12 OS=Homo sapiens GN=TRIP12 PE=1 SV=1	[K].sPTTTQsPk.[S]	3.35355	S7(Phospho): 99.98	64.5913	1.76623	2.52641	169.966	0.169331	0.145902	22.9613	56.7603	0.620895	-1.30568	0.206982
Q14694	Ubiquitin carboxyl-terminal hydrolase 10 OS=Homo sapiens GN=USP10 PE=1 SV=2	[K].nHSVNEEEQEEQGEGsEDEWEQVGPR.[N]	-1.17995	S16(Phospho): 100	10.5188	8.7572	40.4724	42.1129	72.6896	32.7126	19.9161	49.1717	0.140635	-1.30389	0.851907
Q16555	Dihydropyrimidinase-related protein 2 OS=Homo sapiens GN=DPYSL2 PE=1 SV=1	[R].gLYDGPVcEVSVtPk.[T]	0.159779	T13(Phospho): 93.4	7.3827	13.3403	39.3548	22.0571	90.588	35.6562	20.0259	49.4338	0.297852	-1.30363	0.525999
P46821	Microtubule-associated protein 1B OS=Homo sapiens GN=MAP1B PE=1 SV=2	[R].sVNFSLtPNEIk.[V]	-1.74597	T7(Phospho): 100	29.9847	21.1784	14.5444	15.206	124.389	22.4956	21.9025	54.0303	0.458682	-1.30267	0.338488
Q6KC79	Nipped-B-like protein OS=Homo sapiens GN=NIPBL PE=1 SV=2	[K].aAMYDIISsPSk.[D]	-1.13107	S9(Phospho): 99.96	3.28167	20.0564	37.384	5.65007	108.482	35.5932	20.2407	49.9086	0.438064	-1.30203	0.358463
Q5JSZ5	Protein PRRC2B OS=Homo sapiens GN=PRRC2B PE=1 SV=2	[R].sNkGcsEDHSGLDAk.[S]	-0.325279	S6(Phospho): 89.36	63.9005	0.451028	4.46065	156.102	0.176136	13.3825	22.9374	56.5535	0.582705	-1.30191	0.234551
Q05519	Serine/arginine-rich splicing factor 11 OS=Homo sapiens GN=SRSF11 PE=1 SV=1	[K].kPIETGsPk.[T]	-0.459812	S7(Phospho): 96.27	52.2649	1.0676	13.5292	145.904	0.104499	18.6131	22.2872	54.874	0.558435	-1.29991	0.253027
Q9UDY2	Tight junction protein ZO-2 OS=Homo sapiens GN=TJP2 PE=1 SV=2	[R].rHQYSDYDYHssSEkLk.[E]	-1.04886	Y9(Phospho): 88.43; S12(Phospho): 47.69; S13(Phospho): 47.69	30.057	3.1006	29.9753	133.956	0.287619	20.9637	21.0443	51.7358	0.539589	-1.29773	0.267937
P06400	Retinoblastoma-associated protein OS=Homo sapiens GN=RB1 PE=1 SV=2	[K].sNLDEEVNVIPPHtPVR.[T]	1.10809	T14(Phospho): 99.84	11.0723	26.2194	27.2911	12.0704	93.1116	53.1152	21.5276	52.7657	0.312232	-1.29342	0.505523
O75822	Eukaryotic translation initiation factor 3 subunit J OS=Homo sapiens GN=EIF3J PE=1 SV=2	[K].rLEEPEEPkVLtPEEQLADk.[L]	-0.940799	T12(Phospho): 100	6.97374	35.5718	22.7763	12.2471	118.016	29.6677	21.7739	53.3102	0.439255	-1.29181	0.357283
Q5JTV8	Torsin-1A-interacting protein 1 OS=Homo sapiens GN=TOR1AIP1 PE=1 SV=2	[R].dSHssEEDEASSQTDLSQTISkk.[T]	1.12945	S2(Phospho): 94.18; S4(Phospho): 49.97; S5(Phospho): 49.97	30.8592	10.2598	23.2464	82.6122	59.4466	15.2776	21.4551	52.4455	0.253217	-1.2895	0.596507
P11388	DNA topoisomerase 2-alpha OS=Homo sapiens GN=TOP2A PE=1 SV=3	[K].tQMAEVLPsPR.[G]	-0.445456	S9(Phospho): 100	19.3978	29.2126	17.8194	32.3198	102.978	27.0546	22.1433	54.1174	0.320841	-1.28922	0.493711
Q12888	Tumor suppressor p53-binding protein 1 OS=Homo sapiens GN=TP53BP1 PE=1 SV=2	[K].aADIsLDNLVEGkR.[K]	4.01266	S5(Phospho): 100	30.7363	18.404	17.394	34.7505	94.7251	31.9421	22.1781	53.8059	0.259972	-1.27863	0.585073
Q66K74	Microtubule-associated protein 1S OS=Homo sapiens GN=MAP1S PE=1 SV=2	[R].kAPSTSHSGFPPVANGPRsPPSLR.[C]	1.03343	S19(Phospho): 82.76	19.9008	20.4414	24.8937	66.256	70.5639	20.6785	21.7453	52.4995	0.192727	-1.2716	0.715057
Q9UFC0	Leucine-rich repeat and WD repeat-containing protein 1 OS=Homo sapiens GN=LRWD1 PE=1 SV=2	[K].rPDDVPLSLsPSk.[R]	0.857387	S10(Phospho): 50; S12(Phospho): 50	2.19575	30.9689	31.4235	3.00149	101.797	50.8878	21.5294	51.8954	0.40223	-1.2693	0.395526
P46013	Antigen KI-67 OS=Homo sapiens GN=MKI67 PE=1 SV=2	[K].mkTPVQYSQQQNsPQk.[H]	0.555551	S13(Phospho): 100	33.7386	10.7528	22.7378	94.0194	12.5505	55.2003	22.4097	53.9234	0.311023	-1.26679	0.507208
Q7KZF4	Staphylococcal nuclease domain-containing protein 1 OS=Homo sapiens GN=SND1 PE=1 SV=1	[K].vEsPAkIHVFYIDYGNR.[E]	0.599697	S3(Phospho): 99.81	26.2415	5.68237	31.1436	82.539	54.5519	14.6525	21.0225	50.5811	0.269746	-1.26667	0.569045
G3V2U7	Acylphosphatase OS=Homo sapiens GN=ACYP1 PE=1 SV=1	[R].hMQEWLETRGsPk.[S]	2.72675	S11(Phospho): 92.19	6.58905	40.2517	20.4729	12.6449	116.074	33.198	22.4379	53.9724	0.427082	-1.26628	0.369489
Q9Y2W1	Thyroid hormone receptor-associated protein 3 OS=Homo sapiens GN=THRAP3 PE=1 SV=2	[K].ksSSkDSRPSQAAGDNQGDEAk.[E]	-1.84259	S2(Phospho): 69.43	54.8762	2.21657	12.0869	131.232	0.470335	34.2817	23.0599	55.3281	0.508252	-1.26263	0.293921
P52926	High mobility group protein HMGI-C OS=Homo sapiens GN=HMGA2 PE=1 SV=1	[R].kQQQEPTGEPsPk.[R]	-1.51707	T7(Phospho): 50; S11(Phospho): 50	40.3603	5.67339	21.3256	120.299	0.182977	40.9125	22.4531	53.7983	0.471706	-1.26065	0.326328
P06400	Retinoblastoma-associated protein OS=Homo sapiens GN=RB1 PE=1 SV=2	[K].tAVIPINGsPR.[T]	0.706072	S9(Phospho): 100	12.1457	24.0905	30.2765	35.5969	45.7896	77.7641	22.1709	53.0502	0.121269	-1.25869	0.916251
Q01433	AMP deaminase 2 OS=Homo sapiens GN=AMPD2 PE=1 SV=2	[K].hFPLDLRTsMDGk.[C]	-0.489629	T8(Phospho): 50; S9(Phospho): 50	20.6553	19.2361	24.8677	19.0809	119.88	15.7311	21.5864	51.5639	0.472941	-1.25624	0.325193
Q9UFC0	Leucine-rich repeat and WD repeat-containing protein 1 OS=Homo sapiens GN=LRWD1 PE=1 SV=2	[K].rPDDVPLSLsPSkR.[A]	-0.824657	S8(Phospho): 82.92	40.7231	7.26763	19.1855	79.9323	46.8163	33.6662	22.3921	53.4716	0.147256	-1.25579	0.831928
Q13428	Treacle protein OS=Homo sapiens GN=TCOF1 PE=1 SV=3	[K].sLGNILQAkPTsSPAk.[G]	-1.37685	S12(Phospho): 47.46; S13(Phospho): 47.46	3.75999	37.9715	25.1178	3.72728	111.025	44.779	22.2831	53.177	0.431123	-1.25485	0.365399
E7ETY2	Treacle protein OS=Homo sapiens GN=TCOF1 PE=1 SV=1	[K].sLGNILQAkPTsSPAk.[G]	-1.37685	S12(Phospho): 47.46; S13(Phospho): 47.46	3.75999	37.9715	25.1178	3.72728	111.025	44.779	22.2831	53.177	0.431123	-1.25485	0.365399
P07900	Heat shock protein HSP 90-alpha OS=Homo sapiens GN=HSP90AA1 PE=1 SV=5	[K].hLEINPDHsIIETLR.[Q]	0.757681	S9(Phospho): 100	7.51792	13.5847	40.7025	35.4701	75.8362	36.1763	20.6017	49.1609	0.169117	-1.25475	0.771813
Q14315	Filamin-C OS=Homo sapiens GN=FLNC PE=1 SV=3	[R].hIGISFtPk.[E]	0.169945	T7(Phospho): 100	25.9183	8.26226	29.3586	14.7037	108.691	28.122	21.1797	50.5055	0.424233	-1.25375	0.372395
P51003	Poly(A) polymerase alpha OS=Homo sapiens GN=PAPOLA PE=1 SV=4	[K].hYGITsPISLAAPk.[E]	-1.98623	S6(Phospho): 99.18	18.4974	14.7349	31.1154	22.0936	92.4562	38.0923	21.4492	50.8807	0.299403	-1.2462	0.523744
Q8NDT2	Putative RNA-binding protein 15B OS=Homo sapiens GN=RBM15B PE=1 SV=3	[R].tFLEGDWTsPSk.[S]	3.72632	S9(Phospho): 46.85; S11(Phospho): 46.85	24.3622	26.81	16.9403	27.8154	108.503	25.1254	22.7041	53.8146	0.373247	-1.24504	0.428003
P57772	Selenocysteine-specific elongation factor OS=Homo sapiens GN=EEFSEC PE=1 SV=4	[K].iHIPGGLsPESkk.[I]	-0.666919	S8(Phospho): 100	23.9545	8.61583	31.4077	33.2575	84.0606	34.3213	21.326	50.5465	0.216691	-1.245	0.66416
Q9NUY8	TBC1 domain family member 23 OS=Homo sapiens GN=TBC1D23 PE=1 SV=3	[R].ekVIsFIENTSTPVDR.[M]	-0.272413	S5(Phospho): 96.77	23.6606	28.131	15.8674	10.6228	137.173	12.4993	22.553	53.4318	0.538012	-1.24438	0.269208
P18858	DNA ligase 1 OS=Homo sapiens GN=LIG1 PE=1 SV=1	[K].eWNGVVSESDsPVk.[R]	-0.0864528	S11(Phospho): 100	4.77793	33.7642	27.7706	7.20667	109.395	40.3103	22.1042	52.304	0.424308	-1.2426	0.372319
J3KPJ3	Calcium/calmodulin-dependent protein kinase kinase 1 OS=Homo sapiens GN=CAMKK1 PE=1 SV=1	[R].sMSAPGNLLVk.[E]	0.708514	S3(Phospho): 94.28	12.9942	26.3833	26.5561	14.1911	110.154	31.5851	21.9779	51.9767	0.416819	-1.24181	0.380053
O60499	Syntaxin-10 OS=Homo sapiens GN=STX10 PE=1 SV=1	[K].dHmVsPTAVAFLER.[N]	-0.938959	S5(Phospho): 99.95	18.1187	7.8557	36.8733	36.1698	77.6586	34.6712	20.9492	49.4999	0.173025	-1.24053	0.76189
P38435	Vitamin K-dependent gamma-carboxylase OS=Homo sapiens GN=GGCX PE=1 SV=2	[R].tsPSSDkVQk.[D]	-0.0748389	S2(Phospho): 91.47	69.4661	2.03871	0.652723	168.807	0.432596	1.13253	24.0525	56.7906	0.630358	-1.23947	0.200413
Q9UKV3	Apoptotic chromatin condensation inducer in the nucleus OS=Homo sapiens GN=ACIN1 PE=1 SV=2	[K].kASLVALPEQTASEEEtPPPLLTk.[E]	-2.92353	T17(Phospho): 100	11.756	41.1425	16.4456	15.2739	120.99	27.1249	23.1147	54.4628	0.450434	-1.23646	0.346369
Q9UNL4	Inhibitor of growth protein 4 OS=Homo sapiens GN=ING4 PE=1 SV=1	[R].skGkNsDEEAPk.[T]	-0.481445	S1(Phospho): 50; S6(Phospho): 50	66.7008	3.66353	1.89017	166.307	0.252427	3.37122	24.0848	56.6437	0.624116	-1.23379	0.204735
Q13428	Treacle protein OS=Homo sapiens GN=TCOF1 PE=1 SV=3	[K].sLGNILQAkPTSsPAk.[G]	-0.55599	S12(Phospho): 47.71; S13(Phospho): 47.71	4.78302	39.7567	23.665	1.92508	113.714	44.5263	22.7349	53.3884	0.45023	-1.23162	0.346566
E7ETY2	Treacle protein OS=Homo sapiens GN=TCOF1 PE=1 SV=1	[K].sLGNILQAkPTSsPAk.[G]	-0.55599	S12(Phospho): 47.71; S13(Phospho): 47.71	4.78302	39.7567	23.665	1.92508	113.714	44.5263	22.7349	53.3884	0.45023	-1.23162	0.346566
P55265	Double-stranded RNA-specific adenosine deaminase OS=Homo sapiens GN=ADAR PE=1 SV=4	[R].tmLLLsRSPEAQPk.[T]	-0.659086	S8(Phospho): 91.61	17.3034	28.7582	21.2895	13.7296	123.272	21.0533	22.4504	52.6849	0.482897	-1.23065	0.316145
P39687	Acidic leucine-rich nuclear phosphoprotein 32 family member A OS=Homo sapiens GN=ANP32A PE=1 SV=1	[R].nRTPsDVk.[E]	1.45264	S5(Phospho): 93.83	57.2515	6.40575	7.76012	151.269	0.390894	15.8943	23.8058	55.8514	0.581096	-1.23028	0.235752
O75717	WD repeat and HMG-box DNA-binding protein 1 OS=Homo sapiens GN=WDHD1 PE=1 SV=1	[R].sHILEDDENsVDISMLk.[T]	0.586643	S10(Phospho): 100	22.6231	32.9259	14.1027	31.6807	113.589	17.8632	23.2172	54.3775	0.406912	-1.22781	0.3905
Q9H6K1	Uncharacterized protein C6orf106 OS=Homo sapiens GN=C6orf106 PE=1 SV=2	[R].kVEGNFNPFAsPQk.[N]	3.06796	S11(Phospho): 100	23.4755	23.7472	21.213	59.7386	69.6561	30.7226	22.8119	53.3724	0.119624	-1.22631	0.922183
H0YG16	Kinesin light chain 1 (Fragment) OS=Homo sapiens GN=KLC1 PE=1 SV=1	[K].rAsSLNVLNVGGk.[A]	3.27777	S4(Phospho): 99.43	17.6021	8.4219	36.7344	15.778	104.919	26.0766	20.9195	48.9244	0.427784	-1.22571	0.368775
O00567	Nucleolar protein 56 OS=Homo sapiens GN=NOP56 PE=1 SV=4	[R].lIAHAGsLTNLAk.[Y]	0.149129	S7(Phospho): 99.89	33.571	4.12561	28.2993	34.1259	68.064	52.0351	21.9986	51.4084	0.092781	-1.22459	1.03254
Q13439	Golgin subfamily A member 4 OS=Homo sapiens GN=GOLGA4 PE=1 SV=1	[R].vPsVESLFR.[S]	1.46408	S3(Phospho): 100	25.5883	21.0032	20.4391	16.086	128.134	12.3034	22.3435	52.1744	0.5147	-1.22349	0.288446
E7EVX2	Golgin subfamily A member 4 (Fragment) OS=Homo sapiens GN=GOLGA4 PE=1 SV=1	[R].vPsVESLFR.[S]	1.46408	S3(Phospho): 100	25.5883	21.0032	20.4391	16.086	128.134	12.3034	22.3435	52.1744	0.5147	-1.22349	0.288446
Q9H4L7	SWI/SNF-related matrix-associated actin-dependent regulator of chromatin subfamily A containing DEAD/H box 1 OS=Homo sapiens GN=SMARCAD1 PE=1 SV=2	[R].rNDDIsELEDLSELEDLkDAk.[L]	-0.347454	S6(Phospho): 99.95	57.2529	8.42742	5.99842	96.5018	47.1068	23.6533	23.8929	55.754	0.310051	-1.22249	0.508567
Q16763	Ubiquitin-conjugating enzyme E2 S OS=Homo sapiens GN=UBE2S PE=1 SV=2	[K].dFPAsPPkGYFLTk.[I]	0.00755748	S5(Phospho): 99.64	29.5801	14.8694	23.2922	43.6041	74.6624	39.4548	22.5805	52.5738	0.0999332	-1.21926	1.00029
Q9Y6J0	Calcineurin-binding protein cabin-1 OS=Homo sapiens GN=CABIN1 PE=1 SV=1	[K].aYHELLEAsLLR.[E]	0.149363	S9(Phospho): 100	24.858	10.8984	30.0801	30.3048	79.0024	43.8398	21.9455	51.049	0.172636	-1.21796	0.762868
O75385	Serine/threonine-protein kinase ULK1 OS=Homo sapiens GN=ULK1 PE=1 SV=2	[R].lHsAPNLSDLHVVRPk.[L]	-0.241519	S3(Phospho): 100	29.2351	19.3968	19.4731	39.4316	100.453	18.3947	22.7017	52.7597	0.346022	-1.21664	0.460897
Q9UK61	Protein TASOR OS=Homo sapiens GN=FAM208A PE=1 SV=3	[R].kksVGGDsDTEDmR.[S]	1.67962	S3(Phospho): 100; T10(Phospho): 90.95	51.0629	14.4801	7.31003	153.603	3.11577	11.5825	24.2843	56.1005	0.586529	-1.20799	0.231711
Q6WCQ1	Myosin phosphatase Rho-interacting protein OS=Homo sapiens GN=MPRIP PE=1 SV=3	[K].vRVEsGYFSLEk.[T]	-0.9055	S5(Phospho): 99.89	18.3939	28.4636	21.2462	17.235	124.753	15.2588	22.7013	52.4157	0.498007	-1.20723	0.302765
Q07960	Rho GTPase-activating protein 1 OS=Homo sapiens GN=ARHGAP1 PE=1 SV=1	[K].sDDSkSsSPELVTHLk.[W]	0.94465	S8(Phospho): 87	30.2515	15.672	23.7572	86.1874	19.0687	55.392	23.2269	53.5494	0.255724	-1.20507	0.592228
Q9Y490	Talin-1 OS=Homo sapiens GN=TLN1 PE=1 SV=3	[K].skDHFGLEGDEESTMLEDsVSPkk.[S]	0.152228	S21(Phospho): 95.73	7.12989	53.4751	12.3284	36.0019	103.082	28.9598	24.3111	56.0145	0.32921	-1.20418	0.482526
O75554	WW domain-binding protein 4 OS=Homo sapiens GN=WBP4 PE=1 SV=1	[K].nkNsDGGsDPETQkEk.[S]	1.1371	S4(Phospho): 100; S8(Phospho): 98.7	67.8492	5.40271	0.664138	168.736	0.132806	1.42828	24.6387	56.7655	0.635063	-1.20409	0.197183
Q6P0N0	Mis18-binding protein 1 OS=Homo sapiens GN=MIS18BP1 PE=1 SV=1	[K].tPFNTDLGENsGIGk.[L]	-0.0559409	S11(Phospho): 100	8.47785	48.5836	14.8969	21.6448	110.374	33.7251	23.9861	55.2479	0.385587	-1.20372	0.413878
H7C1N3	BET1 homolog (Fragment) OS=Homo sapiens GN=BET1 PE=1 SV=1	[K].sLSIEIGHEVk.[T]	-0.202864	S3(Phospho): 99.99	18.7119	21.7509	26.6802	18.2546	107.202	29.0349	22.381	51.4971	0.408018	-1.20222	0.38932
Q12906	Interleukin enhancer-binding factor 3 OS=Homo sapiens GN=ILF3 PE=1 SV=3	[K].rPmEEDGEEksPSk.[K]	0.512552	S11(Phospho): 99.67	26.6329	11.5882	30.665	78.4838	0.239078	79.3297	22.962	52.6842	0.374881	-1.19812	0.426107
O95067	G2/mitotic-specific cyclin-B2 OS=Homo sapiens GN=CCNB2 PE=1 SV=1	[K].dLASPLIGRs.[-]	1.68625	S10(Phospho): 99.99	29.6683	12.3525	25.8921	45.6826	69.3538	40.7077	22.6376	51.9147	0.059213	-1.19742	1.22758
P33316	Deoxyuridine 5'-triphosphate nucleotidohydrolase, mitochondrial OS=Homo sapiens GN=DUT PE=1 SV=4	[R].gSGGFGsTGkN.[-]	0.0843954	S7(Phospho): 99.58	66.3017	1.61324	5.058	160.586	0.07227	6.65233	24.3243	55.7702	0.621659	-1.19709	0.206448
P35568	Insulin receptor substrate 1 OS=Homo sapiens GN=IRS1 PE=1 SV=1	[R].tHsAGTsPTITHQk.[T]	3.48094	S7(Phospho): 99.27; T9(Phospho): 99.26	58.1101	0.983752	12.2841	145.787	0.232684	17.5545	23.7927	54.5247	0.582651	-1.19639	0.234591
Q09666	Neuroblast differentiation-associated protein AHNAK OS=Homo sapiens GN=AHNAK PE=1 SV=2	[K].aPsLDIkGPEVDVSGPk.[L]	-0.462083	S3(Phospho): 100	23.0739	28.9295	18.2613	46.4105	89.9492	24.5629	23.4216	53.6409	0.254774	-1.1955	0.593845
P27816	Microtubule-associated protein 4 OS=Homo sapiens GN=MAP4 PE=1 SV=3	[K].dmEsPTkLDVTLAk.[D]	0.252677	S4(Phospho): 90.85	29.0822	9.04354	28.189	49.8363	84.641	17.3095	22.1049	50.5956	0.277729	-1.19465	0.556379
E7EVA0	Microtubule-associated protein OS=Homo sapiens GN=MAP4 PE=1 SV=1	[K].dmEsPTkLDVTLAk.[D]	0.252677	S4(Phospho): 90.85	29.0822	9.04354	28.189	49.8363	84.641	17.3095	22.1049	50.5956	0.277729	-1.19465	0.556379
Q9Y2W1	Thyroid hormone receptor-associated protein 3 OS=Homo sapiens GN=THRAP3 PE=1 SV=2	[K].ksSSkDSRPSQAAGDNQGDEAk.[E]	0.277381	S3(Phospho): 46.29; S4(Phospho): 46.29	59.1553	3.38123	10.0937	133.071	0.204585	32.8266	24.2101	55.3672	0.531399	-1.19342	0.274579
O60271	C-Jun-amino-terminal kinase-interacting protein 4 OS=Homo sapiens GN=SPAG9 PE=1 SV=4	[R].sAsQSSLDkLDQELkEQQk.[E]	0.623125	S3(Phospho): 52.18; S5(Phospho): 89.38; S6(Phospho): 47.82	21.4495	34.1499	17.4555	73.1072	32.3992	61.2364	24.3516	55.581	0.107711	-1.19057	0.967738
A0A087X2D8	C-Jun-amino-terminal kinase-interacting protein 4 OS=Homo sapiens GN=SPAG9 PE=1 SV=1	[R].sAsQSSLDkLDQELkEQQk.[E]	0.623125	S3(Phospho): 52.18; S5(Phospho): 89.38; S6(Phospho): 47.82	21.4495	34.1499	17.4555	73.1072	32.3992	61.2364	24.3516	55.581	0.107711	-1.19057	0.967738
Q5SNT2	Transmembrane protein 201 OS=Homo sapiens GN=TMEM201 PE=1 SV=1	[R].aLsLGTIPSLTR.[A]	0.0302097	S3(Phospho): 99.81	32.5724	23.8048	14.2217	22.7953	121.066	16.7155	23.533	53.5255	0.469557	-1.18554	0.328311
P27816	Microtubule-associated protein 4 OS=Homo sapiens GN=MAP4 PE=1 SV=3	[K].etERASPIkmDLAPSk.[D]	0.41515	S6(Phospho): 98.65	44.413	5.35432	20.5973	81.4781	27.8465	50.6186	23.4549	53.3144	0.202277	-1.18464	0.694054
E7EVA0	Microtubule-associated protein OS=Homo sapiens GN=MAP4 PE=1 SV=1	[K].etERASPIkmDLAPSk.[D]	0.41515	S6(Phospho): 98.65	44.413	5.35432	20.5973	81.4781	27.8465	50.6186	23.4549	53.3144	0.202277	-1.18464	0.694054
P57772	Selenocysteine-specific elongation factor OS=Homo sapiens GN=EEFSEC PE=1 SV=4	[K].iHIPGGLsPESk.[K]	0.319974	S8(Phospho): 100	23.1944	8.82853	33.7382	29.8795	84.1618	35.3666	21.9204	49.8026	0.243162	-1.18395	0.614104
Q09666	Neuroblast differentiation-associated protein AHNAK OS=Homo sapiens GN=AHNAK PE=1 SV=2	[K].msLPDVDLDLk.[G]	0.160304	S2(Phospho): 100	12.3702	36.5522	20.5073	1.5077	142.549	13.6246	23.1433	52.5605	0.582883	-1.18339	0.234419
E7EX17	Eukaryotic translation initiation factor 4B OS=Homo sapiens GN=EIF4B PE=1 SV=1	[R].sQSsDTEQQsPTSGGGk.[V]	1.92889	T6(Phospho): 84.97; S10(Phospho): 99.21	60.4803	6.55035	6.73727	151.987	0.721732	14.5234	24.5893	55.7441	0.594966	-1.18079	0.225508
O14867	Transcription regulator protein BACH1 OS=Homo sapiens GN=BACH1 PE=1 SV=2	[R].eDSSVASSDRsSVEREVAEHLAk.[G]	0.831729	S4(Phospho): 55.44	12.5514	14.8462	38.2642	36.4271	69.0797	43.175	21.8873	49.5606	0.101061	-1.1791	0.995414
Q9BTU6	Phosphatidylinositol 4-kinase type 2-alpha OS=Homo sapiens GN=PI4K2A PE=1 SV=1	[R].vAAAAGSGPsPPGsPGHDRERQPLLDR.[A]	-1.00413	S10(Phospho): 99.74; S14(Phospho): 100	22.613	10.716	32.766	15.0619	100.67	33.6133	22.0317	49.7816	0.398726	-1.17603	0.399325
P43243	Matrin-3 OS=Homo sapiens GN=MATR3 PE=1 SV=2	[K].tDGSQkTEsSTEGkEQEEk.[S]	-0.849244	T11(Phospho): 78.34	61.2692	3.98372	8.31539	150.558	0.10361	15.1681	24.5228	55.2767	0.597085	-1.17255	0.223964
A8MXP9	Matrin-3 OS=Homo sapiens GN=MATR3 PE=1 SV=1	[K].tDGSQkTEsSTEGkEQEEk.[S]	-0.849244	T11(Phospho): 78.34	61.2692	3.98372	8.31539	150.558	0.10361	15.1681	24.5228	55.2767	0.597085	-1.17255	0.223964
Q8IY33	MICAL-like protein 2 OS=Homo sapiens GN=MICALL2 PE=1 SV=1	[R].tscSPQkAQEANk.[A]	0.265254	S2(Phospho): 48.13; S4(Phospho): 48.13	62.1715	5.75509	6.22839	155.133	0.398085	11.5645	24.7183	55.6984	0.607859	-1.17205	0.216197
O60664	Perilipin-3 OS=Homo sapiens GN=PLIN3 PE=1 SV=3	[K].eLVsSkVSGAQEmVSSAk.[D]	1.45634	S4(Phospho): 33.33; S5(Phospho): 33.33; S8(Phospho): 33.33	35.419	14.0451	20.9367	58.2541	63.0008	37.315	23.467	52.8566	0.0462558	-1.17145	1.33483
Q9Y3M8	StAR-related lipid transfer protein 13 OS=Homo sapiens GN=STARD13 PE=1 SV=2	[R].mHEFHsQENLVVHIPk.[D]	0.0815306	S6(Phospho): 100	16.4483	12.3307	36.6694	40.8514	84.8073	21.4538	21.8161	49.0375	0.28207	-1.16849	0.549643
O60524	Nuclear export mediator factor NEMF OS=Homo sapiens GN=NEMF PE=1 SV=4	[R].nPYLLsEEEDDDVDGDVNVEkNETEPPkGk.[K]	0.0892166	S6(Phospho): 87.85	18.3172	46.7064	11.151	88.6637	34.6648	47.7363	25.3915	57.0216	0.191422	-1.16716	0.718008
Q01433	AMP deaminase 2 OS=Homo sapiens GN=AMPD2 PE=1 SV=2	[K].hFPLDLRTsMDGk.[C]	-0.199172	S9(Phospho): 92.89	20.3372	16.8794	29.9606	17.8519	110.169	22.7063	22.3924	50.2424	0.451662	-1.1659	0.345187
Q29RF7	Sister chromatid cohesion protein PDS5 homolog A OS=Homo sapiens GN=PDS5A PE=1 SV=1	[K].sALcNADsPkDPVLPMk.[F]	0.543706	S8(Phospho): 99.97	7.79648	18.0049	39.887	17.4305	86.8604	42.9174	21.8961	49.0694	0.316109	-1.16415	0.500164
Q9H8U3	AN1-type zinc finger protein 3 OS=Homo sapiens GN=ZFAND3 PE=1 SV=1	[R].scGTDSQSENEAsPVkRPR.[L]	3.26837	S13(Phospho): 100	58.2569	6.40867	9.19292	150.44	0.503401	14.5311	24.6195	55.158	0.597269	-1.16377	0.22383
Q5SRQ6	Casein kinase II subunit beta OS=Homo sapiens GN=CSNK2B PE=1 SV=2	[K].iHPMAYQLQLQAASNFksPVk.[T]	-0.815664	S18(Phospho): 84.77	23.0055	28.0713	20.341	41.3897	82.8623	35.7462	23.8059	53.3327	0.182654	-1.1637	0.738372
P42566	Epidermal growth factor receptor substrate 15 OS=Homo sapiens GN=EPS15 PE=1 SV=2	[K].rSINkLDsPDPFk.[L]	-0.408268	S8(Phospho): 99.99	1.94503	43.4301	24.2473	0.308076	145.725	9.77708	23.2075	51.9368	0.60738	-1.16217	0.216539
Q16666	Gamma-interferon-inducible protein 16 OS=Homo sapiens GN=IFI16 PE=1 SV=3	[R].lkTEPEEVSIEDsAQSDLk.[E]	-2.14215	S9(Phospho): 49.92; S13(Phospho): 49.92	28.7239	14.2372	27.1372	21.4299	64.1052	71.2124	23.3661	52.2492	0.197774	-1.16099	0.703831
Q58FF8	Putative heat shock protein HSP 90-beta 2 OS=Homo sapiens GN=HSP90AB2P PE=1 SV=2	[K].iEDVGsDEEDDSGkDkk.[K]	2.13627	S6(Phospho): 99.5	36.0903	6.0128	27.864	107.692	1.04543	47.5458	23.3224	52.0946	0.453309	-1.15942	0.343605
P08238	Heat shock protein HSP 90-beta OS=Homo sapiens GN=HSP90AB1 PE=1 SV=4	[K].iEDVGsDEEDDSGkDkk.[K]	2.13627	S6(Phospho): 99.5	36.0903	6.0128	27.864	107.692	1.04543	47.5458	23.3224	52.0946	0.453309	-1.15942	0.343605
P26599	Polypyrimidine tract-binding protein 1 OS=Homo sapiens GN=PTBP1 PE=1 SV=1	[K].eLkTDSsPNQAR.[A]	-0.207596	S7(Phospho): 91.28	48.15	11.6058	13.974	125.586	1.8593	37.2214	24.5766	54.8888	0.502581	-1.15922	0.298794
Q8N163	Cell cycle and apoptosis regulator protein 2 OS=Homo sapiens GN=CCAR2 PE=1 SV=2	[R].sVAsNQSEMEFSSLQDMPk.[E]	0.440275	S4(Phospho): 93.39	10.5231	20.8291	36.0801	32.8694	72.0873	45.6302	22.4774	50.1956	0.125692	-1.15908	0.900692
Q9Y5B0	RNA polymerase II subunit A C-terminal domain phosphatase OS=Homo sapiens GN=CTDP1 PE=1 SV=3	[R].eNsPAAFPDREGVPPTALFHPMPVLPk.[A]	-2.79421	S3(Phospho): 99.2	18.2117	27.8129	24.7598	35.0947	78.8919	43.9204	23.5948	52.6356	0.157011	-1.15757	0.804069
Q9NYF8	Bcl-2-associated transcription factor 1 OS=Homo sapiens GN=BCLAF1 PE=1 SV=2	[K].eTQsPEQVkSEk.[L]	-0.823917	S4(Phospho): 98.91	60.5089	4.13287	9.45693	144.091	0.541062	20.5768	24.6996	55.0696	0.580257	-1.15677	0.23638
P49802	Regulator of G-protein signaling 7 OS=Homo sapiens GN=RGS7 PE=1 SV=3	[R].sHSPTHTPTPETkPPTEDELQQQIk.[Y]	1.50398	S3(Phospho): 44.25; T5(Phospho): 44.25	14.6881	19.9012	33.072	36.9956	84.6795	28.9433	22.5537	50.2061	0.248535	-1.1545	0.604612
Q14103	Heterogeneous nuclear ribonucleoprotein D0 OS=Homo sapiens GN=HNRNPD PE=1 SV=1	[K].iDASkNEEDEGHsNSSPR.[H]	1.45083	S15(Phospho): 49.82; S16(Phospho): 49.82	30.3294	11.1416	29.0958	96.3829	0.221131	60.454	23.5223	52.3527	0.413179	-1.15424	0.383861
Q5T200	Zinc finger CCCH domain-containing protein 13 OS=Homo sapiens GN=ZC3H13 PE=1 SV=1	[R].nTEESsSPVRk.[E]	-0.838967	S7(Phospho): 99.98	72.9086	0.906723	1.7768	163.865	0.192399	4.1736	25.1974	56.0768	0.639593	-1.15413	0.194096
Q8WUR7	UPF0235 protein C15orf40 OS=Homo sapiens GN=C15orf40 PE=1 SV=2	[K].vLELRksDVVLDk.[KG]	1.09227	S7(Phospho): 100	14.6072	21.919	31.8903	22.0252	89.6191	40.4175	22.8055	50.6873	0.29939	-1.15224	0.523763
A0A0A0MQU4	Selenocysteine lyase OS=Homo sapiens GN=SCLY PE=1 SV=1	[K].gHTGGHHsPVk.[G]	0.411783	S8(Phospho): 99.23	57.5155	1.75936	13.3856	157.754	0.373321	3.29231	24.2201	53.8065	0.634185	-1.15157	0.197784
A0A087X1R1	Smoothelin OS=Homo sapiens GN=SMTN PE=1 SV=1	[R].vNkAPEGRsPLSAEELmTIEDEGVLDk.[M]	-0.141676	S9(Phospho): 99.91	16.8582	38.1381	17.7067	42.9979	96.7921	21.6465	24.2343	53.8122	0.315946	-1.15088	0.500387
Q12768	WASH complex subunit strumpellin OS=Homo sapiens GN=KIAA0196 PE=1 SV=1	[K].tLMNAVsPLk.[S]	0.168921	S7(Phospho): 100	22.4499	12.4716	33.7316	23.815	63.2492	64.964	22.8844	50.676	0.16309	-1.14694	0.787571
Q9UFC0	Leucine-rich repeat and WD repeat-containing protein 1 OS=Homo sapiens GN=LRWD1 PE=1 SV=2	[K].rPDDVPLSLsPSk.[R]	2.73631	S10(Phospho): 99.99	2.24429	44.5012	25.8273	5.37023	88.8831	66.269	24.1909	53.5074	0.370851	-1.14527	0.4308
Q99733	Nucleosome assembly protein 1-like 4 OS=Homo sapiens GN=NAP1L4 PE=1 SV=1	[R].lDNVPHTPSsYIETLPk.[A]	-0.28442	Y11(Phospho): 89.79	25.6286	12.8519	29.9296	22.7494	93.0354	35.4967	22.8034	50.4272	0.328789	-1.14495	0.483083
Q9H0B6	Kinesin light chain 2 OS=Homo sapiens GN=KLC2 PE=1 SV=1	[K].rASsLNFLNk.[S]	0.677235	S4(Phospho): 95.67	6.52396	30.0284	31.9446	10.4048	112.995	28.0131	22.8323	50.4711	0.477954	-1.14438	0.320613
Q5UIP0	Telomere-associated protein RIF1 OS=Homo sapiens GN=RIF1 PE=1 SV=2	[K].sPLHIkDDVLPk.[Q]	0.744036	S1(Phospho): 100	19.4084	20.2332	29.0482	25.2495	103.744	22.6797	22.8966	50.5578	0.407782	-1.1428	0.389572
[truncated: 22,747 more rows]
